# Supplementary material
Source: PubMed Central journal article supplement (PMC5545780)
Supplement: NIHMS880374-supplement.pdf [file NIHMS880374-supplement.pdf]

**Supplementary Materials:**

**Supplementary Figures**

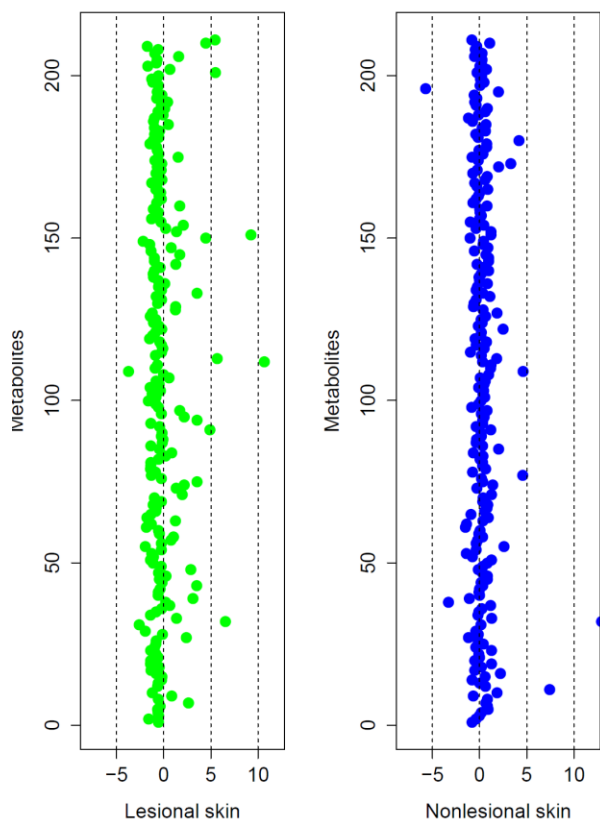

**Supplementary Figure 1. Z-scores for negatively charged metabolites**

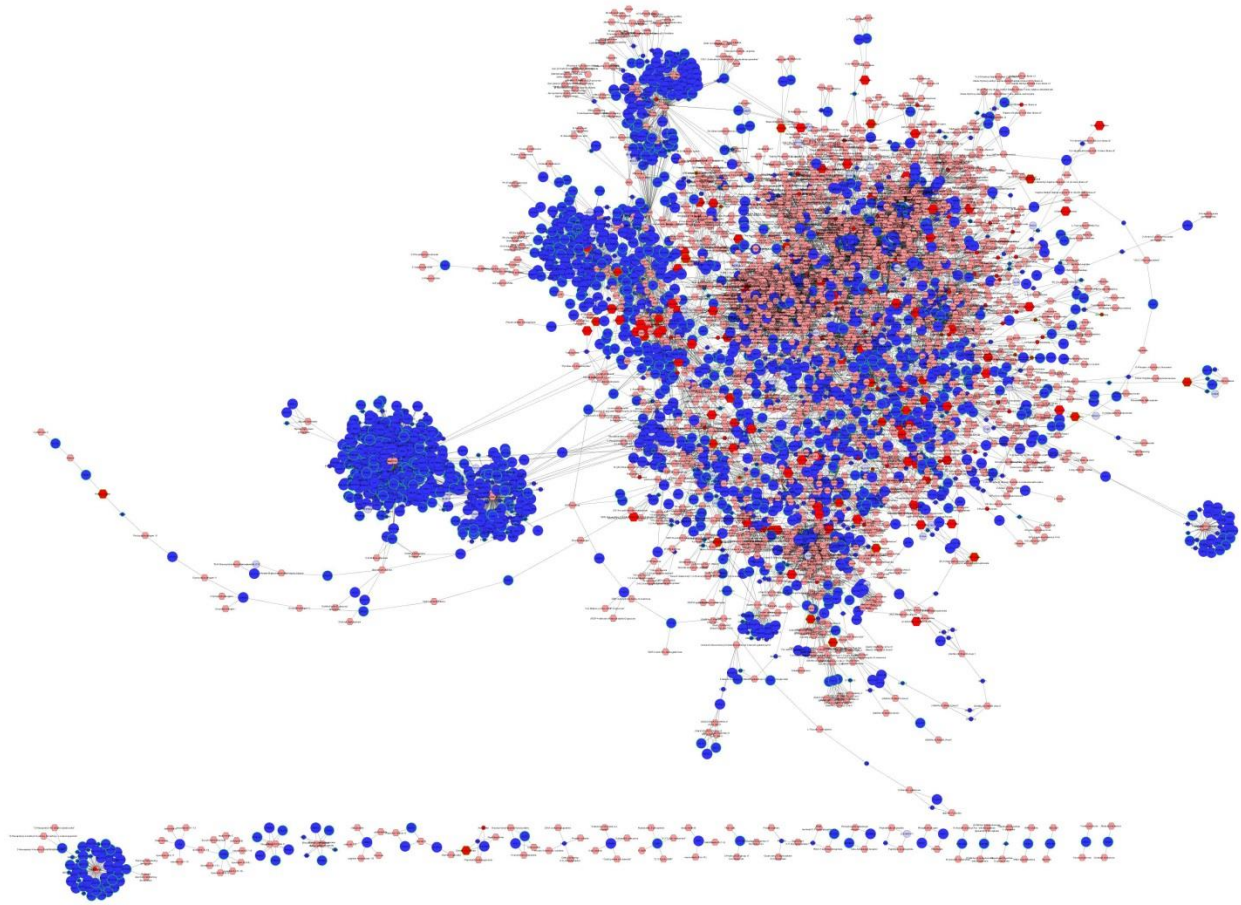

**Supplementary Figure 2. Global view of transcriptional and metabolomic changes in psoriatic skin.** Genome wide expression analysis of mRNA expression by RNA-seq in psoriasis vs normal skin (blue) against metabolomic profiling of psoriatic vs normal skin (red). Smaller circles represent decreased expression, smaller hexagons represents decreased levels of compound in psoriatic skin.

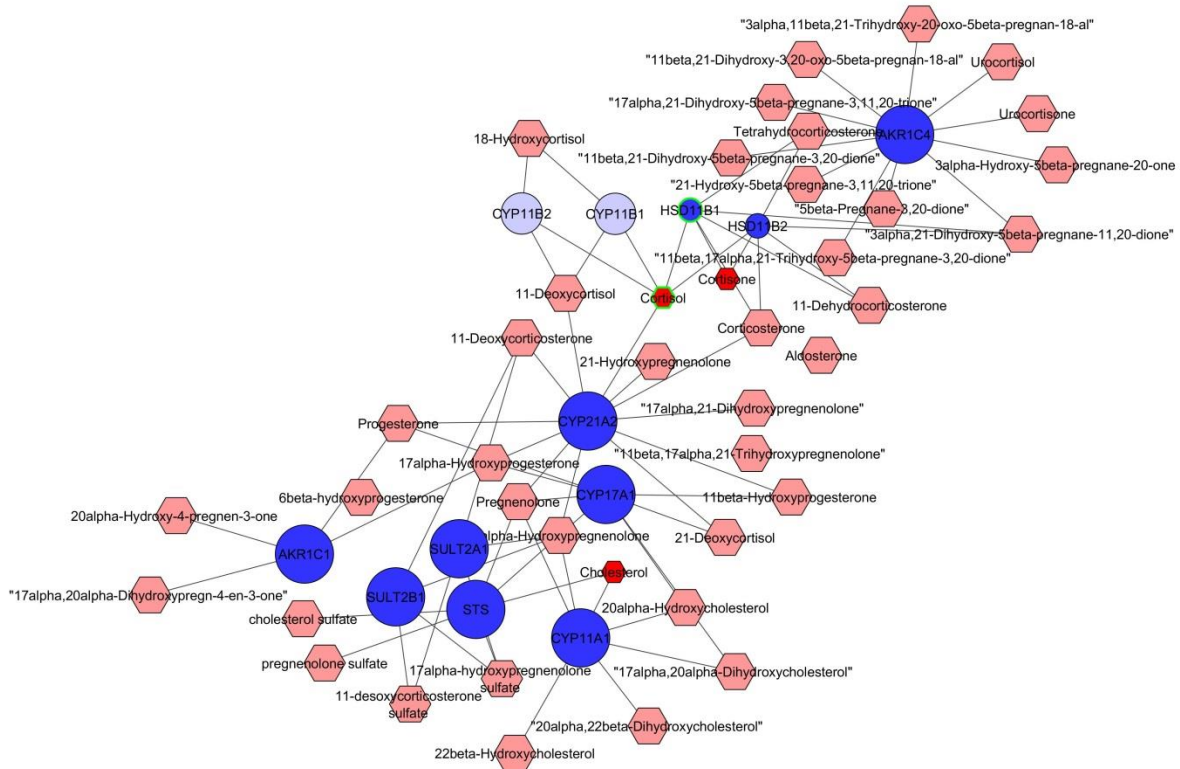

**Supplementary Figure 3: Steroid biosynthetic pathway.** Cross-analysis of mRNA expression by RNA-seq in psoriasis vs normal skin (blue) against metabolomic profiling of psoriatic vs normal skin (red). Smaller circles represent decreased expression, smaller hexagons represents decreased levels of compound in psoriatic skin.

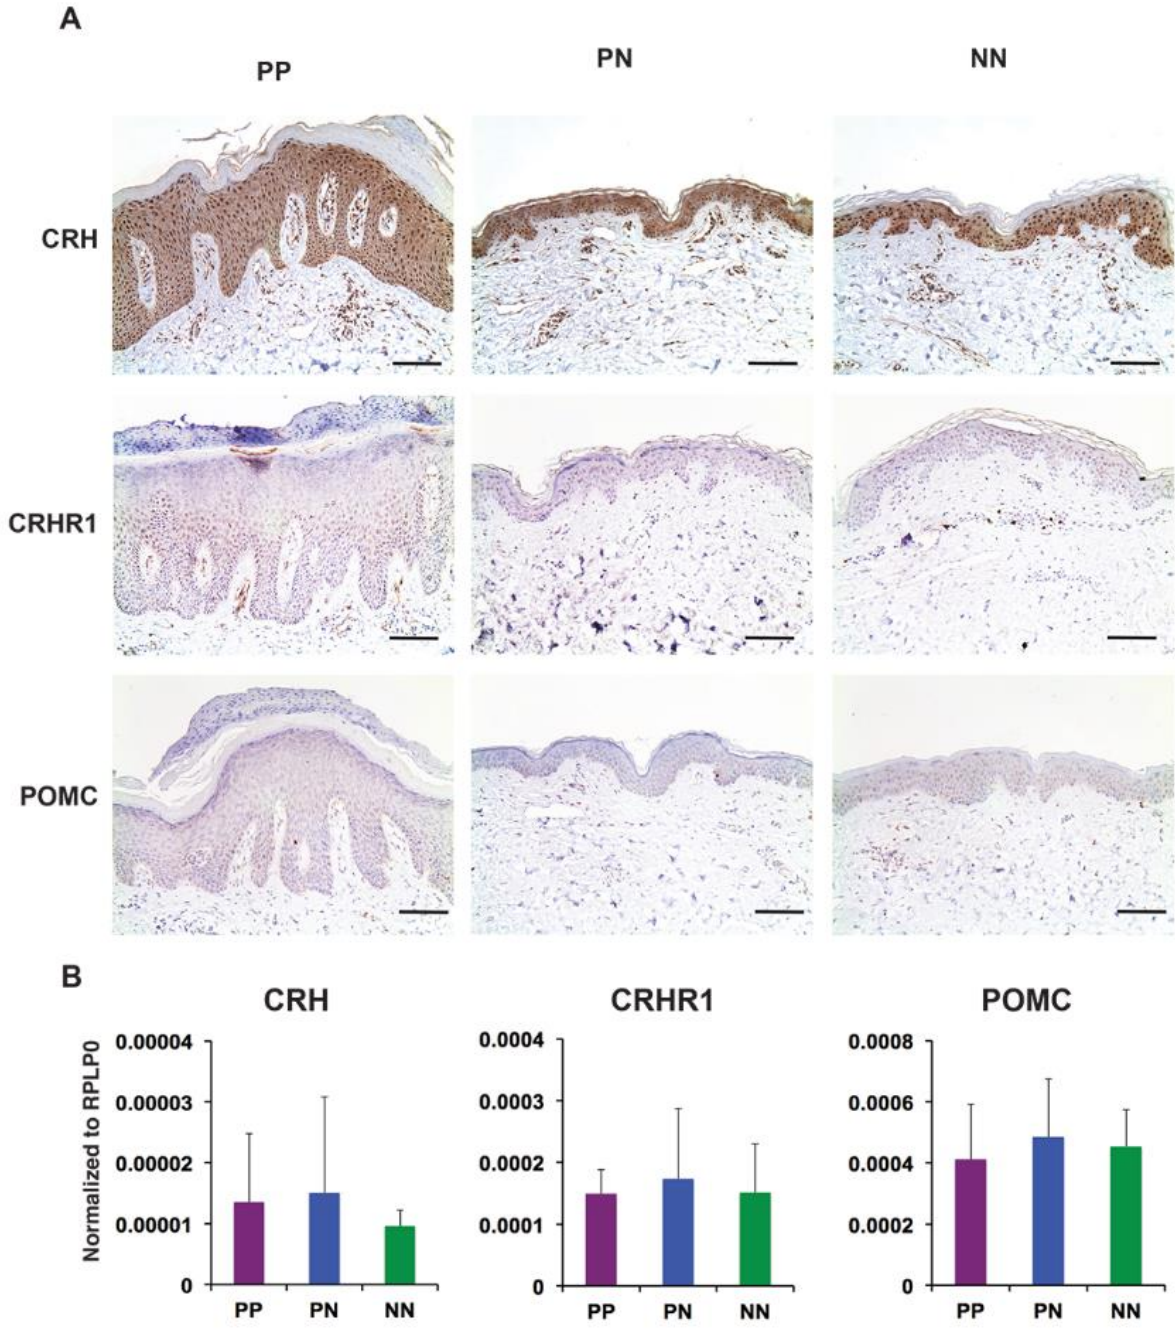

**Supplementary Figure 4: HPA axis in psoriasis.** We were unable to detect differences in the protein (A) or mRNA expression of the HPA axis members CRH, CRHR1 and POMC in psoriatic skin. Data are shown with SEM, n=4 for each experiment. For IHC representative figures are shown (n=3).

# HSD11B1

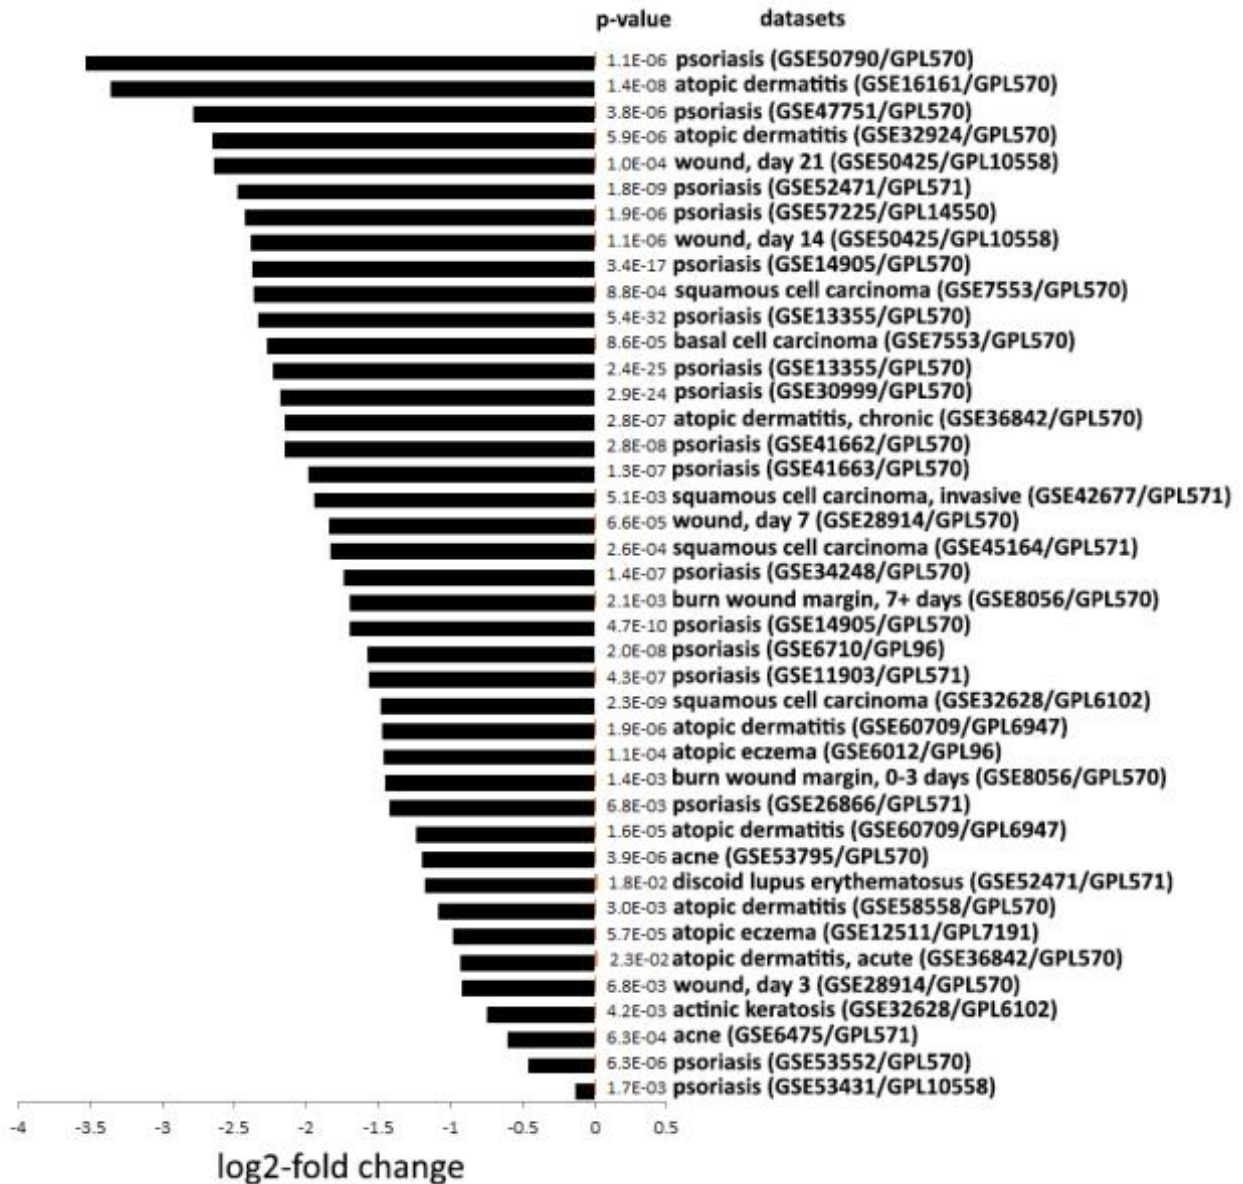

Supplementary Figure 5 – related to Figure 3. HSD11B1 expression across skin disease datasets. Geo accession numbers (<http://www.ncbi.nlm.nih.gov/gds>) are listed in parentheses.

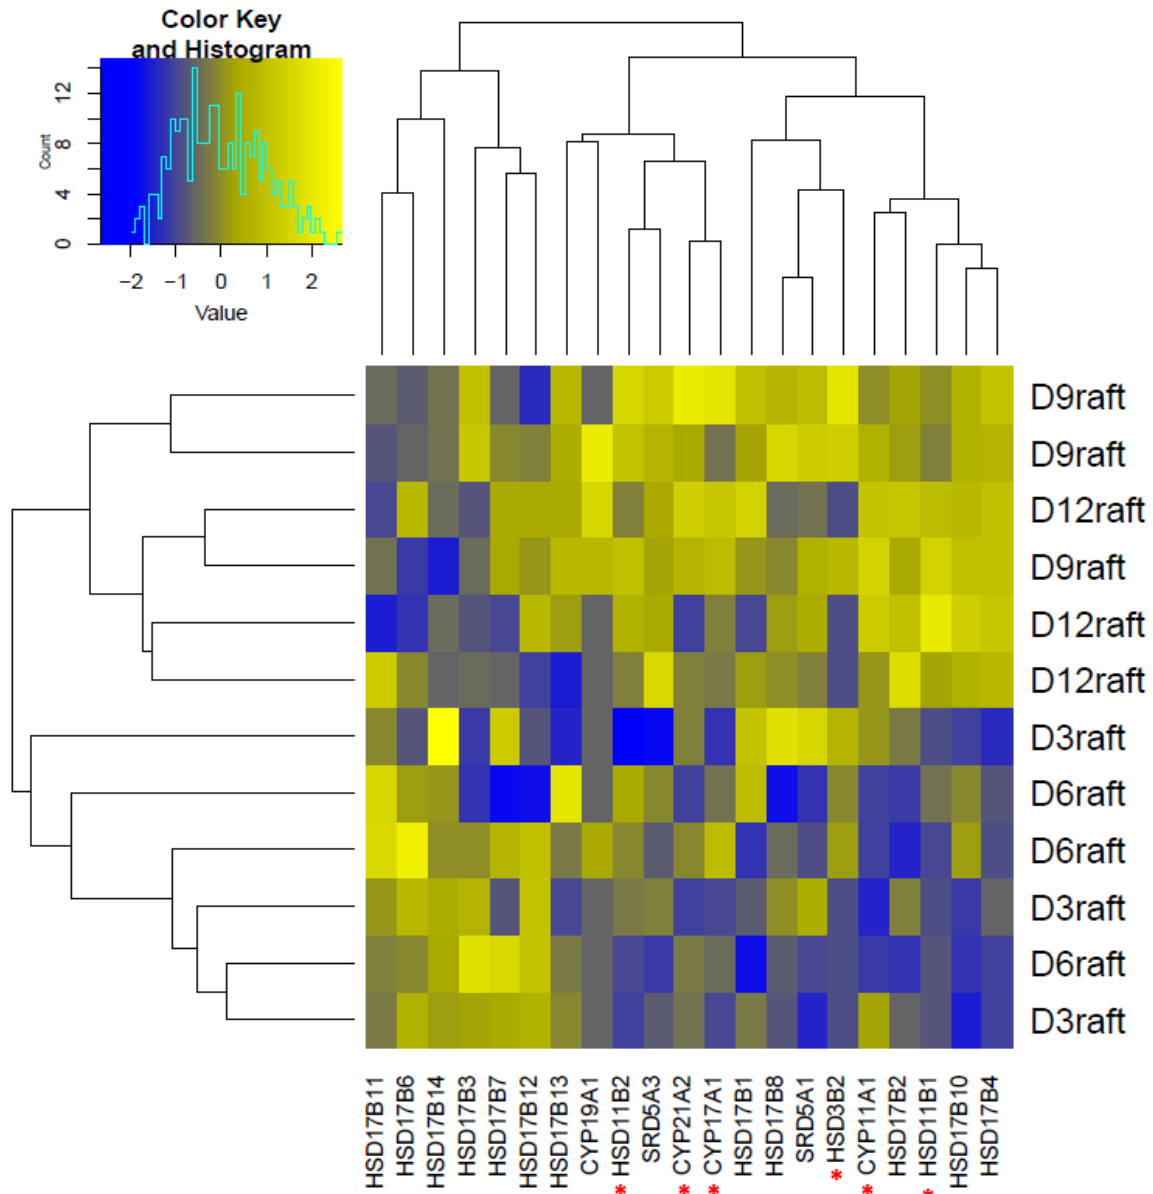

**Supplementary Figure 6. Expression of steroid biosynthesis genes in 3D skin cultures** is dependent upon the differentiation stage of the epidermal rafts. Using hierarchical clustering the rafts grouped according to differentiation stage. The majority of critical enzymes in glucocorticoid biosynthesis (red asterisk) are more highly expressed in in differentiated (Day9-Day12 rafts) compared to less differentiated rafts (Day 3-Day6).

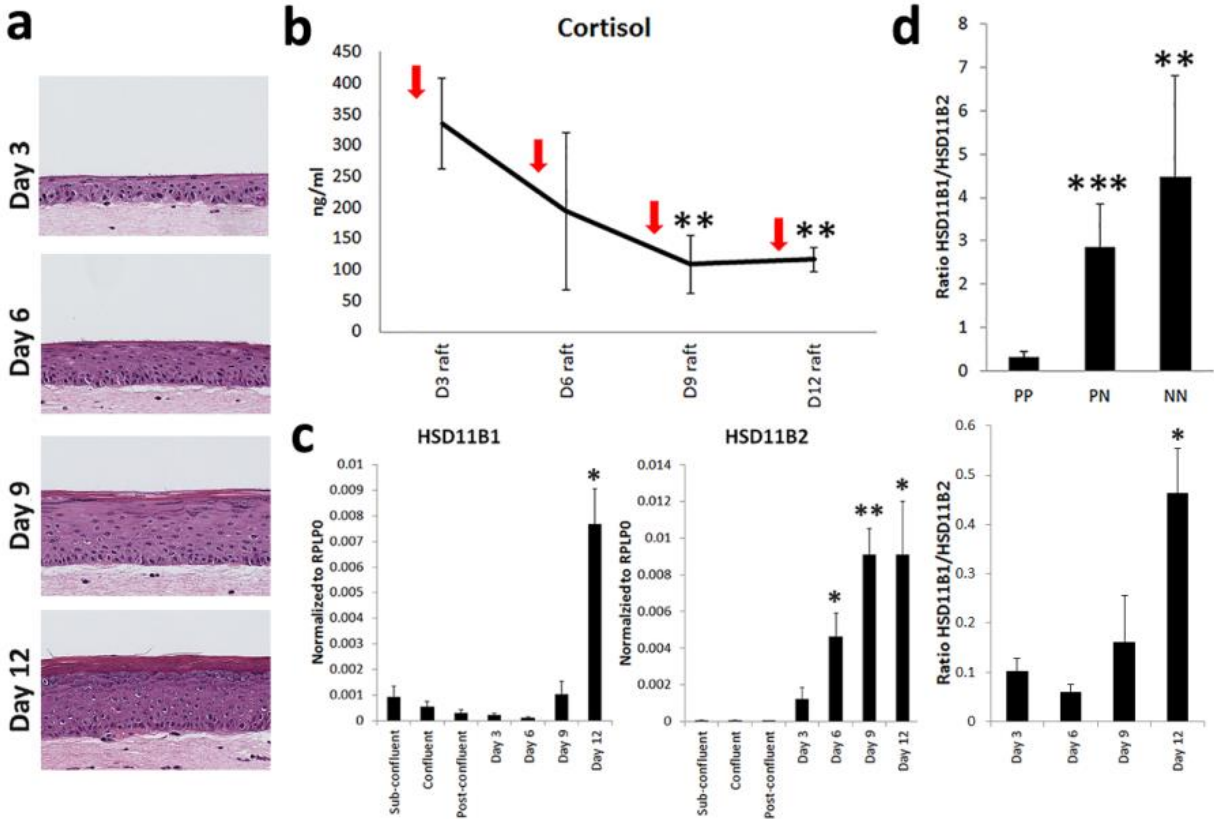

**Supplementary Figure 7. Steroid biosynthesis and utilization is dependent upon differentiation state of the epidermis.** (a) In the 3-D human epidermal tissue culture model the keratinocyte monolayer is rebuilt into a fully stratified epidermis in 12 days. (b) Cortisol levels in culture supernatants progressively decrease with progression of epidermal development. (Note that these cultures are supplemented with 1000nM of hydrocortisone; red arrows indicate time of supplementation). (c) Differentiation was closely associated with increased gene expression of HSD11B1 and HSD11B2. (d) As HSD11B1 regulates synthesis of cortisol and HSD11B2 facilitates conversion of biologically active cortisol to inactive cortisone we determined the ratio between HSD11B1 and HSD11B2 in both psoriatic (PP), uninvolved (PN) and normal skin (NN)(D) and at different stages of epidermal development, with the ratio in fully developed rafts trending toward a pattern seen in normal skin. (Data are shown with SEM, n=3 for each experiment, \*p<0.05, \*\*p<0.01).

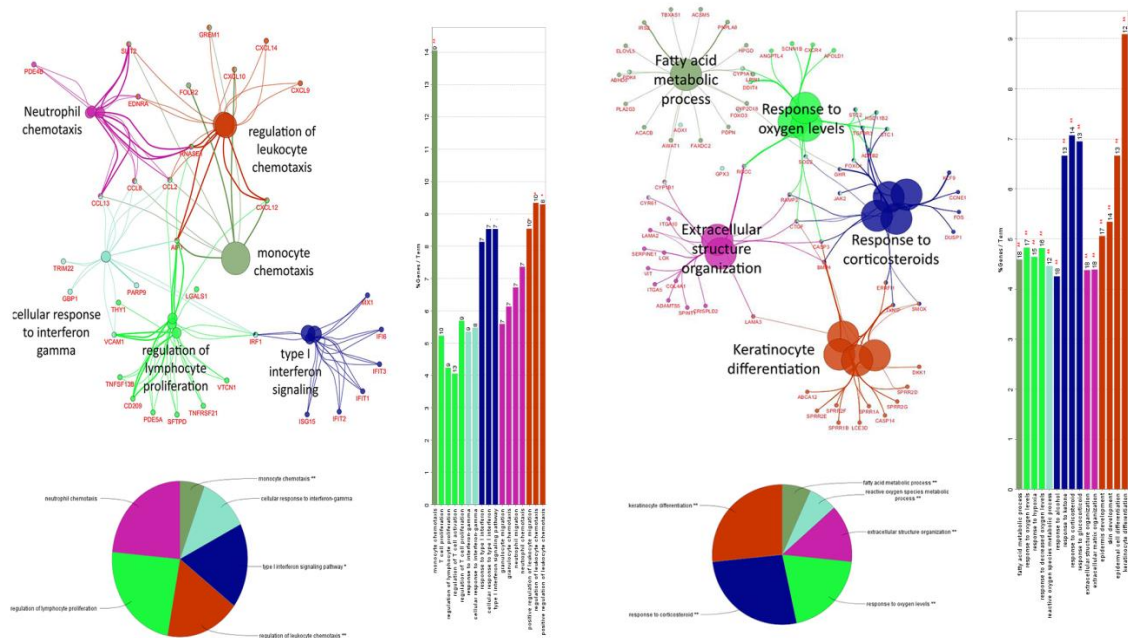

**Supplementary Figure 8. Genes suppressed (left) and induced (right) with topical application of steroids in normal skin.** The analysis was performed using Cytoscape and ClueGo on 328 genes suppressed and 427 genes induced in normal skin following topical application of glucocorticoid for 24 hours ( $p < 0.05$ ). The figures shows enriched biologic categories along with associated genes amongst glucocorticoid suppressed (left) and induced (right) genes.

### Supplementary Data Files.

Supplementary data file 1. Compounds identified in positive mode (positively charged compounds)

Supplementary data file 2. Compounds identified in negative mode (negatively charged compounds)

Supplementary data file 3. Gene ontology of genes expressed in psoriatic and normal skin against # of TF binding sites.



## **SUPPLEMENTARY MATERIALS AND METHODS**

### **Patient cohort**

Nine patients with moderate chronic plaque psoriasis were enrolled for this study. Patients were off all systemic treatment at least 4 weeks and off all topical treatments 2 weeks prior to enrollment. Two biopsies were taken under local anesthesia from each psoriatic patient and each healthy control, with one biopsy submitted for RNA-sequencing and the other matching biopsy for metabolomic profiling. For the steroid treated cohort (n=3) patients underwent a single six millimeter punch biopsy prior to initiation of treatment and after 7 days of topical steroid use (triamcinolone acetate 0.1%). For healthy subjects, clobetasol propionate was applied topically as a 0.05% cream to the skin of right arm of healthy human volunteers once as described (Baida *et al.*, 2015). Untreated left arm skin was used as control. Biopsies were taken 24h after treatment.

### **3-D human epidermal tissue cultures**

Normal human epidermal keratinocytes were isolated from a pool of neonatal foreskins (n=3) and grown using a J2-3T3 mouse fibroblasts as feeder layer as originally described by Rheinwald and Green (Nature, 1977). 3-D human epidermal raft cultures seeded in collagen hydrogels were prepared using three distinct donor pools as described previously (Arnette Getsios *et al.* 2016) and grown at air-liquid interface for 12 days in E-Medium (DMEM/DMEM-F12 (1:1), 5% Fetal Bovine Serum, , adenine (180 $\mu$ M), Bovine pancreatic insulin (5 $\mu$ g/ml), Human apo-transferrin (5 $\mu$ g/ml), triiodothyronine (5 $\mu$ g/ml), L-Glutamine (4mM), Cholera toxin (10ng/ml),

Gentamicin (10 $\mu$ g/ml), Amphotericin B (0.25 $\mu$ g/ml)) supplemented with various concentrations of hydrocortisone or cortisol as indicated in the text. In some experiments, the cultures were treated with an HSD11B1 inhibitor PF915275 (10 $\mu$ M). For cytokine stimulations the 3-D RHE cultures were established as previously described (Simpson *et al.*, 2010). After 9 days at an air-liquid-interface to allow for epidermal maturation, the RHEs were treated with 0.1% BSA/phosphate-buffered saline (Sigma Aldrich, St Louis, MO) as a vehicle control or 10.0 ng/ml TNF- $\alpha$ , IL-17A, IL-22 (R&D Systems, Minneapolis, MN) alone or as a combination for 72 h, harvested, and analyzed for changes in gene expression as described (Gordon *et al.*, 2013). At harvest, culture medium conditioned for 24hr media was collected and stored at -80 for further analysis. Epidermal tissues were separated from the collagen scaffold and lysed in QIAzol for RNA isolation. For histological analysis, rafts were fixed in 10% neutral buffered formalin for 24hr and embedded in paraffin (Arnette *et al.*, 2016).

### **Serum analyses and ELISAs**

Serum was obtained from 37 patients with moderate-to-severe psoriasis and 43 healthy non-psoriatic controls. These samples were obtained at evaluation of patients recruited into our psoriasis genetic cohort database (Li *et al.*, 2014) and stored at -80°C until analysis. Serum and culture supernatants cortisol levels were measured using a competitive enzyme immunoassay (R&D Systems, cat# KGE008). ELISA kit for CXCL9 and CXCL10 was obtained from R&D Systems (cat# DY392 and DY266).

### **RNA-seq processing, QRT-PCR, statistical and bioinformatics analyses**

Six millimeter punch biopsies from six psoriatic patients (both lesional, and non-lesional skin) and six healthy normal controls were obtained. Skin was anaesthetized with lidocaine with epinephrine (1:10,000). Matching biopsies were taken and snap frozen in liquid nitrogen. Biopsy tissue was stored at -80°C until processing. At processing, tissue was homogenized and RNA isolated with RNeasy Plus Mini kit (Qiagen). RNA was isolated from epidermal rafts in a similar manner as described above. RNA quality was assessed using the Agilent 2100 Bioanalyzer (Agilent) and only samples with RNA-quality above RIN of 7 were subjected to RNA-sequencing. 50 nucleotide single-end read was performed using Illumina Hi-Seq 2000 Genome Analyzer (Illumina). The reads were mapped by Cufflinks (Trapnell *et al.*, 2010) and TopHat (Trapnell *et al.*, 2009) and gene expression levels were expressed as fragments per kilobase of region per million mapped reads (FPKM). Genomic location binding sites for NR3C1 were identified using HOMER (<http://homer.salk.edu/homer/>). For skin from healthy individuals treated with topical clobetasol RNA was hybridized with the Human Whole-Genome Gene Expression BeadChips HT-12v4.0 (Illumina). Data processing was performed using the Limma package and differentially expressed probes were identified using the linear model implemented in Limma. For QRT-PCR RNA was reverse transcribed using a High Capacity cDNA Transcription kit (Applied Biosystems). qRT-PCR was performed using the 7900HT Fast Real-Time PCR system (Applied Biosystems) with Taqman primers purchased from Applied Biosystems (CXCL1: Hs00236937\_m1; CXCL8: Hs00174103; CXCL9: Hs0017065; CXCL10: Hs01124251; RPLP0: Hs99999902; HSD11B1: Hs01547870; HSD11B2: Hs00388669; IVL: Hs00846307\_s1; LOR: Hs01894962; FLG: Hs00856927; DEFB4: HS00175474; IL36G: Hs00219742; CRH: Hs01921237\_s1; CRHR1: Hs00366363\_m1; POMC: Hs01596743\_m1.

## **Immunohistochemistry and immunofluorescence**

Immunohistochemistry was performed on 5 µm thick paraffin sections from skin and epidermal rafts using antibodies against CYP21A2 (LifeSpan Biosciences # LS-B9758), HSD3B2 (Fisher Scientific # PIPA527791), HSD11B1 (LifeSpan Biosciences # LS-C172267), NR3C1 (Abnova Corp # MAB0119), Cortisol (Sigma-Aldrich # c8409), CRH (Abcam # ab8901), CRHR1 (ThermoFisher # 720290), POMC (Santa Cruz # Sc-20148), hBD2 (PeproTech Inc # 500-P161G), CXCL9 (Novus Biologicals # NBP1-31155), CXCL10 (PeproTech Inc # 500-P93), FLG (LifeSpan Biosciences # LS-C153448), E-cadherin (HECD1; Gift from M. Takeichi and O. Abe, RIKEN Center for Developmental Biology, Kobe, Japan), DSG1/2 (4B2 supernatant, anti-Dsg1 cytodomain (Dusek *et al.*, 2006); LOR (BioLegend). Secondary antibodies for immunofluorescence were obtained from (Life technologies, Alexa Flour 555 and 488).

## **Metabolomic profiling**

For untargeted metabolomic profiling tissue was homogenized and cell pellet was resuspended in a 1.5ml microcentrifuge tube with 500µl of extraction solvent composed of methanol, chloroform and water at 8:1:1 ratios. Samples were kept on ice and sonicated briefly and then centrifuged for 10 min at 15,000 rpm at 4°C. 250µl of supernatant was transferred to another 1.5ml microcentrifuge tube and dried under nitrogen stream at room temperature. Sample was then reconstituted in 100µl of reconstitution solvent composed of methanol and water at 1:1 ratio. Samples were subsequently vortexed for 5 minutes and then centrifuged for 5 min at 15,000 rpm. Supernatants were then transferred to autosampler vials. Chromatography was

performed on 1290 Infinity Binary LC System from Agilent together with Waters Acquity UPLC HSST3 1.8 $\mu$ m 2.1 x 100 mm column in connection with a Water Acquity UPLC HSS T3 1.8 $\mu$ m VanGuard Pre-column. Mass spectrometry was performed using Agilent Technologies 6530 Accurate-Mass Q-ToF with a dual ASJ ESI ion source.

For targeted steroid profiling samples were prepared for analysis by protein precipitation followed by liquid-liquid extraction. Protein was precipitated with 300  $\mu$ l acetonitrile and methanol (2:1 ratio). The mixture was spiked with internal standard solution and then centrifuged for 10 minutes at 14,000 rpm. The supernatant was transferred to a 2 ml vial for extraction. 1 ml of methyl- t-butyl ether (MTBE) was added to the 2 ml vial and the steroid analytes extracted via vigorous mixing with a vortex mixer. After extraction, 0.5 ml of deionized water which was added to the 2 ml vial and vigorously stirred on a vortex mixer to wash the organic phase and to enhance phase separation. The MTBE organic phase was transferred to a clean 2 ml vial and the MTBE dried down with highly purified N<sub>2</sub>. The dried extract was reconstituted with 100  $\mu$ l of 50:50 methanol: deionized water, transferred to an autosampler vial, and analyzed by LC/MS (MRM mode). Samples were analyzed with an Agilent 1290 HPLC and 6490 QqQ LC/MS using ESI with positive/negative polarity switching ionization mode. The steroids were resolved on a Phenomenex Biphenyl 50 x 2.1 mm column. A methanol-Di H<sub>2</sub>O gradient was used for elution of the steroids from the reversed phase column. Mobile phase A was Di H<sub>2</sub>O with 0.25  $\mu$ M ammonium fluoride and mobile phase B was methanol with 0.20 $\mu$ M ammonium fluoride.

## **Statistics**

For all experiments described, 2-tailed Student's t tests were performed. Graphs are presented as mean  $\pm$  SEM. P-values less than 0.05 were considered statistically significant. Raw data processing of metabolomic data was done using Agilent software (MassHunter Qual, and ProFinder). Quality of analysis was performed by visual inspection of the chromatographic traces and relative quantification of internal standards. Analysis reproducibility was also evaluated using comparison of multiple injections of the pooled sample created by combining aliquots of all the samples included in the set and pooled human blood sample plasma samples. Data analysis was performed with Agilent MassProfiler Pro package using recursive analysis workflow. Data were processed using MassHunter Quantitative analysis version B.07.00. Steroids were identified by compound-specific MRM, normalized to a the nearest isotope labeled internal standard, and quantitated using 2 replicated injections of 10 standards to create a linear calibration curve with accuracy better than 80% for each standard.

## **Study approval**

Informed consent was obtained from all patients and controls, under protocols approved by the Institutional Review Board of the University of Michigan Medical School, and Northwestern University Institutional Review Board. This study was conducted according to the Declaration of Helsinki Principles.

| <b>Sample ID</b> | <b>Name</b> | <b>GROUP</b>  | <b>FILE</b>                   |
|------------------|-------------|---------------|-------------------------------|
| S00001201        |             | POOLED PLASMA | Neg_Human Plasma Extraction_0 |
| S00001201        |             | POOLED PLASMA | Neg_Human Plasma Extraction_1 |
| S00001201        |             | POOLED PLASMA | Neg_Human Plasma Extraction_2 |
| S00001201        |             | POOLED PLASMA | Neg_Human Plasma Extraction_3 |
| S00001201        |             | POOLED PLASMA | Neg_Human Plasma Extraction_4 |
| S00001201        |             | POOLED PLASMA | Neg_Human Plasma Extraction_5 |
| S00001201        |             | POOLED PLASMA | Neg_Human Plasma Extraction_6 |
| S00016763        |             | POOLED        | Neg Pool QC 1                 |
| S00016763        |             | POOLED        | Neg Pool QC 2                 |
| S00016763        |             | POOLED        | Neg Pool QC 3                 |
| S00016763        |             | POOLED        | Neg Pool QC 4                 |
| S00015447        | 5022PP      | Lesional      | Neg_S00015447_1               |
| S00015448        | 5258PP      | Lesional      | Neg_S00015448_2               |
| S00015449        | 5311PP      | Lesional      | Neg_S00015449_3               |
| S00015450        | 5397PP      | Lesional      | Neg_S00015450_4               |
| S00015451        | TR PP       | Lesional      | Neg_S00015451_5               |
| S00015452        | KB PP       | Lesional      | Neg_S00015452_6               |
| S00015453        | 5022PN      | Nonlesional   | Neg_S00015453_7               |
| S00015454        | 5258PN      | Nonlesional   | Neg_S00015454_8               |
| S00015455        | 5311PN      | Nonlesional   | Neg_S00015455_9               |
| S00015456        | 5397PN      | Nonlesional   | Neg_S00015456_10              |
| S00015457        | TR PN       | Nonlesional   | Neg_S00015457_11              |
| S00015458        | KB PN       | Nonlesional   | Neg_S00015458_12              |
| S00015459        | 6108 C      | Healthy       | Neg_S00015459_13              |
| S00015460        | 5660 C      | Healthy       | Neg_S00015460_14              |
| S00015461        | 4480 C      | Healthy       | Neg_S00015461_15              |
| S00015462        | 6609 C      | Healthy       | Neg_S00015462_16              |
| S00015463        | 6998 C      | Healthy       | Neg_S00015463_17              |
| S00015464        | DM NN       | Healthy       | Neg_S00015464_18              |

| Compound                                    | Alignment Value                       | Annotations                           | CAS Number                              | CHEBI ID         | CompoundSpectrum                                                                                         | Compound Name                                       | KEGG ID          | CompoundAlgo  | Frequency | Ionization mode | Mass      | METUN ID | PubChem ID | Retention time |
|---------------------------------------------|---------------------------------------|---------------------------------------|-----------------------------------------|------------------|----------------------------------------------------------------------------------------------------------|-----------------------------------------------------|------------------|---------------|-----------|-----------------|-----------|----------|------------|----------------|
| (S)-3-METHYL-2-OXOPENTANOATE                | CAS# 146 (S)-3-METHYL-2-OXOPENTANOATE | CAS# 146 (S)-3-METHYL-2-OXOPENTANOATE | CAS# 1460-34-0                          | (M)-H            | (129.0591, 22849.188)(130.0762, 1548.8589)(131.06252, 1548.8589)                                         | (S)-3-METHYL-2-OXOPENTANOATE [CAS# 1460-34-0] (M)-H | C00671           | FindByFormula | 22        | -               | 130.0631  |          |            | 4.4240836      |
| (S)-DIHYDRODIOTATE                          | CAS# 5988-19-2                        | (M)-H                                 | (S)-DIHYDRODIOTATE                      | CAS# 5988-19-2   | (M)-H                                                                                                    | (S)-DIHYDRODIOTATE                                  | CAS# 5988-19-2   | (M)-H         | 1         | -               | 158.0333  |          |            | 0.8360995      |
| 1,2-DIOXECAN-5-OXOGLYCEROL-3-PHOSPHOIC ACID | CAS# 5415-44-1                        | 1,3,7-TRIMETHYLURIC ACID              | CAS# 5415-44-1                          | (M)-H            | (157.0254, 742.122)(158.0339, 78.9131)                                                                   | (S)-DIHYDRODIOTATE [CAS# 5988-19-2] (M)-H           | C00377           | FindByFormula | 1         | -               | 158.0333  |          |            | 4.9668863      |
| 1,3-DITHIOLURIC ACID                        | CAS# 5415-44-1                        | 1,3,7-TRIMETHYLURIC ACID              | CAS# 5415-44-1                          | (M)-H            | (157.0254, 742.122)(158.0339, 78.9131)                                                                   | (S)-DIHYDRODIOTATE [CAS# 5988-19-2] (M)-H           | C00377           | FindByFormula | 1         | -               | 158.0333  |          |            | 4.9668863      |
| 1,3-DIMETHYLURIC ACID                       | CAS# 944-73-0                         | (N)-1,3-DIMETHYLURIC ACID             | CAS# 944-73-0                           | (M)-H            | (209.0679, 3860.4912)(210.0684, 372.9791)(211.0602, 301.13, 7-TRIMETHYLURIC ACID [CAS# 5415-44-1] (M)-H) | (S)-DIHYDRODIOTATE [CAS# 5988-19-2] (M)-H           | C00377           | FindByFormula | 11        | -               | 210.0747  |          |            | 1.9543386      |
| 1,7-DIMETHYLURIC ACID                       | CAS# 33888-03-0                       | 1,7-DIMETHYLURIC ACID                 | CAS# 33888-03-0                         | (M)-H            | (195.05246, 1263.7914)(196.05211, 118.73999)                                                             | 1,3-DIMETHYLURIC ACID [CAS# 944-73-0] (M)-H         |                  | FindByFormula | 6         | -               | 196.0527  |          |            | 3.2079918      |
| 101.5556(9.998)                             |                                       |                                       |                                         |                  | (195.05237, 3812.3406)(196.05241, 452.16888)(197.05211, 41.7)                                            | 1,7-DIMETHYLURIC ACID [CAS# 33888-03-0] (M)-H       |                  | FindByFormula | 6         | -               | 196.0527  |          |            | 4.033669       |
| 1054.5459(8.1190805)                        |                                       |                                       |                                         |                  | (204.7854, 3103.019)(205.7207, 64.92)                                                                    | 1,7-DIMETHYLURIC ACID [CAS# 33888-03-0] (M)-H       |                  | FindByFormula | 6         | -               | 196.0527  |          |            | 4.5691595      |
| 1057.5635(8.565948)                         |                                       |                                       |                                         |                  | (526.2657, 1753.4933)(526.7685, 1094.9083)                                                               | 1054.5459(8.1190805)                                |                  | FindByFormula | 6         | -               | 1054.5459 |          |            | 11.908605      |
| 10-HYDROXYDECANOATE                         | CAS# 1679-53-4                        | 10-HYDROXYDECANOATE                   | CAS# 1679-53-4                          | (M)-H            | (547.7747, 3104.0935)(548.27594, 1937.8448)(548.77814, 71.1097)                                          | 10-HYDROXYDECANOATE [CAS# 1679-53-4] (M)-H          | C02774           | FindByFormula | 6         | -               | 1057.5635 |          |            | 8.856948       |
| 11-DEOXYCORTISOL                            | CAS# 152-58-9                         | (M)-H                                 | 11-DEOXYCORTISOL                        | CAS# 152-58-9    | (M)-H                                                                                                    | 11-DEOXYCORTISOL                                    | CAS# 152-58-9    | (M)-H         | 5         | -               | 346.2121  |          |            | 15.37562       |
| 1216.686(0.212625)                          |                                       |                                       |                                         |                  | (391.2173, 689.3999)(392.2136, 192.01)(393.20673, 84.11)                                                 | 11-DEOXYCORTISOL [CAS# 152-58-9] (M)-H              |                  | FindByFormula | 6         | -               | 1216.686  |          |            | 12.016485      |
| 1232.6279(0.218259)                         |                                       |                                       |                                         |                  | (615.30707, 1082.5183)(615.80927, 752.0884)                                                              | 1232.6279(0.218259)                                 |                  | FindByFormula | 6         | -               | 1232.6279 |          |            | 10.128259      |
| 1395.5635(0.11952295)                       |                                       |                                       |                                         |                  | (696.7736, 2589.9468)(697.2746, 1929.1816)(697.77783, 891.1395)                                          | 1395.5635(0.11952295)                               |                  | FindByFormula | 6         | -               | 1395.5635 |          |            | 11.952295      |
| 1435.7188(0.21801547)                       |                                       |                                       |                                         |                  | (716.85226, 271.6651)(717.35504, 1614.4252)(717.8545, 84.1435)                                           | 1435.7188(0.21801547)                               |                  | FindByFormula | 6         | -               | 1435.7188 |          |            | 12.801547      |
| 1535.682(0.9177126)                         |                                       |                                       |                                         |                  | (785.2653, 3181.2917)(787.3374, 2415.0667)(787.8378, 121.1535)                                           | 1535.682(0.9177126)                                 |                  | FindByFormula | 4         | -               | 1535.682  |          |            | 9.177126       |
| 1557.6479(0.176014)                         |                                       |                                       |                                         |                  | (777.8265, 1460.3251)(778.3272, 1068.3027)(778.8284, 835.1157)                                           | 1557.6479(0.176014)                                 |                  | FindByFormula | 4         | -               | 1557.6479 |          |            | 1.917614       |
| 160 LYSO PC                                 | CAS# 17364-16-8                       | (M)-C                                 | 160 LYSO PC                             | CAS# 17364-16-8  | (M)-C                                                                                                    | 160 LYSO PC                                         | CAS# 17364-16-8  | (M)-C         | 16        | -               | 495.3349  |          |            | 22.27187       |
| 160 LYSO PE                                 | CAS# 17364-16-8                       | (M)-H                                 | 160 LYSO PE                             | CAS# 17364-16-8  | (M)-H                                                                                                    | 160 LYSO PE                                         | CAS# 17364-16-8  | (M)-H         | 28        | -               | 495.3333  |          |            | 22.20294       |
| 160-180 PC                                  | CAS# 59403-51-9                       | (M)-C                                 | 160-180 PC                              | CAS# 59403-51-9  | (M)-C                                                                                                    | 160-180 PC                                          | CAS# 59403-51-9  | (M)-C         | 8         | -               | 761.5864  |          |            | 25.72194       |
| 160-180 PE                                  | CAS# 59403-51-9                       | (M)-H                                 | 160-180 PE                              | CAS# 59403-51-9  | (M)-H                                                                                                    | 160-180 PE                                          | CAS# 59403-51-9  | (M)-H         | 17        | -               | 761.5896  |          |            | 25.37854       |
| 180 LYSO PE                                 | CAS# 69747-55-3                       | (M)-H                                 | 180 LYSO PE                             | CAS# 69747-55-3  | (M)-H                                                                                                    | 180 LYSO PE                                         | CAS# 69747-55-3  | (M)-H         | 27        | -               | 481.3177  |          |            | 22.67387       |
| 196.8179(0.7106276)                         |                                       |                                       |                                         |                  | (195.88393, 9212.413)(196.88449, 2058.0652)(197.88092, 1.196)                                            | 196.8179(0.7106276)                                 |                  | FindByFormula | 27        | -               | 196.8179  |          |            | 0.7106276      |
| 1-HYDROXY-2-NAPHTHOATE                      | CAS# 86-48-6                          | 1-HYDROXY-2-NAPHTHOATE                | CAS# 86-48-6                            | (M)-H            | (187.041, 593.0738)(188.0379, 85.35166)                                                                  | 1-HYDROXY-2-NAPHTHOATE [CAS# 86-48-6] (M)-H         | C03203           | FindByFormula | 6         | -               | 188.0465  |          |            | 15.720319      |
| 1-METHYLADEOSINE                            | CAS# 15783-06-1                       | (N)-1-METHYLADEOSINE                  | CAS# 15783-06-1                         | (M)-H            | (181.08145, 342.48998)(187.08706, 113.3131)                                                              | 1-METHYLADEOSINE [CAS# 15783-06-1] (M)-H            |                  | FindByFormula | 4         | -               | 281.1097  |          |            | 2.980495       |
| 1-METHYLADEOSINE                            | CAS# 15783-06-1                       | (N)-1-METHYLADEOSINE                  | CAS# 15783-06-1                         | (M)-H            | (181.08145, 342.48998)(187.08706, 113.3131)                                                              | 1-METHYLADEOSINE [CAS# 15783-06-1] (M)-H            |                  | FindByFormula | 4         | -               | 281.1097  |          |            | 2.980495       |
| 1-METHYLURIC ACID                           | CAS# 708-79-2                         | (2M)-H                                | 1-METHYLURIC ACID                       | CAS# 708-79-2    | (2M)-H                                                                                                   | 1-METHYLURIC ACID                                   | CAS# 708-79-2    | (2M)-H        | 6         | -               | 182.0436  |          |            | 2.202326       |
| 1-METHYLURIC ACID                           | CAS# 708-79-2                         | (M)-H                                 | 1-METHYLURIC ACID                       | CAS# 708-79-2    | (M)-H                                                                                                    | 1-METHYLURIC ACID                                   | CAS# 708-79-2    | (M)-H         | 6         | -               | 182.0436  |          |            | 2.202326       |
| 1-OLEOYL-RAC-GLYCEROL                       | CAS# 111-03-5                         | (1)-OLEOYL-RAC-GLYCEROL               | CAS# 111-03-5                           | (M)-H            | (181.0362, 898.3651)(182.0369, 65.585)                                                                   | 1-METHYLURIC ACID [CAS# 708-79-2] (M)-H             |                  | FindByFormula | 2         | -               | 182.0436  |          |            | 2.202326       |
| 2'-CYCLIC CMP                               | CAS# 15738-51-1                       | (M)-H                                 | 2'-CYCLIC CMP                           | CAS# 15738-51-1  | (M)-H                                                                                                    | 2'-CYCLIC CMP                                       | CAS# 15738-51-1  | (M)-H         | 2         | -               | 356.2919  |          |            | 22.731297      |
| 2,3-DIHYDROXY-2-PHOSPHONOPROPANOIC ACID     | CAS# 2553-59-5                        | (M)-H                                 | 2,3-DIHYDROXY-2-PHOSPHONOPROPANOIC ACID | CAS# 2553-59-5   | (M)-H                                                                                                    | 2,3-DIHYDROXY-2-PHOSPHONOPROPANOIC ACID             | CAS# 2553-59-5   | (M)-H         | 1         | -               | 185.9491  |          |            | 0.869          |
| 2,3-DIHYDROXYBENZATE                        | CAS# 303-38-8                         | (M)-H                                 | 2,3-DIHYDROXYBENZATE                    | CAS# 303-38-8    | (M)-H                                                                                                    | 2,3-DIHYDROXYBENZATE                                | CAS# 303-38-8    | (M)-H         | 11        | -               | 154.0266  |          |            | 4.87388        |
| 2',4'-DIHYDROXYACETOPHENONE                 | CAS# 89-84-9                          | (M)-H                                 | 2',4'-DIHYDROXYACETOPHENONE             | CAS# 89-84-9     | (M)-H                                                                                                    | 2',4'-DIHYDROXYACETOPHENONE                         | CAS# 89-84-9     | (M)-H         | 6         | -               | 152.0469  |          |            | 7.436485       |
| 2,5-DIOXOPIPRAZINE                          | CAS# 106-57-0                         | (M)-H                                 | 2,5-DIOXOPIPRAZINE                      | CAS# 106-57-0    | (M)-H                                                                                                    | 2,5-DIOXOPIPRAZINE                                  | CAS# 106-57-0    | (M)-H         | 1         | -               | 114.043   |          |            | 0.7239896      |
| 200 LYSO PC                                 | CAS# 108241-80-0                      | (M)-C                                 | 200 LYSO PC                             | CAS# 108241-80-0 | (M)-C                                                                                                    | 200 LYSO PC                                         | CAS# 108241-80-0 | (M)-C         | 3         | -               | 551.3929  |          |            | 22.17962       |
| 240 SM (D18:1724)                           | CAS# 60037-60-7                       | (M)-H                                 | 240 SM (D18:1724)                       | CAS# 60037-60-7  | (M)-H                                                                                                    | 240 SM (D18:1724)                                   | CAS# 60037-60-7  | (M)-H         | 21        | -               | 814.6953  |          |            | 27.89458       |
| 265.2973(0.282048)                          |                                       |                                       |                                         |                  | (859.69226, 653.77374)(860.6929, 227.12668)(861.69366, 84.240 SM (D18:1724))                             | 265.2973(0.282048)                                  |                  | FindByFormula | 28        | -               | 265.2973  |          |            | 22.82048       |
| 2-AMINOETHYL DIHYDROGEN PHOSPHATE           | CAS# 1071-23-4                        | (M)-H                                 | 2-AMINOETHYL DIHYDROGEN PHOSPHATE       | CAS# 1071-23-4   | (M)-H                                                                                                    | 2-AMINOETHYL DIHYDROGEN PHOSPHATE                   | CAS# 1071-23-4   | (M)-H         | 19        | -               | 141.0195  |          |            | 0.8782667      |
| 2-DEOXY-D-GULOSE                            | CAS# 570-020-9                        | (M)-H                                 | 2-DEOXY-D-GULOSE                        | CAS# 570-020-9   | (M)-H                                                                                                    | 2-DEOXY-D-GULOSE                                    | CAS# 570-020-9   | (M)-H         | 12        | -               | 164.0673  |          |            | 0.7944426      |
| 2-DEOXYINOSINE                              | CAS# 890-38-0                         | (M)-H                                 | 2-DEOXYINOSINE                          | CAS# 890-38-0    | (M)-H                                                                                                    | 2-DEOXYINOSINE                                      | CAS# 890-38-0    | (M)-H         | 9         | -               | 252.0869  |          |            | 1.924869       |
| 2-HYDROXY-3-METHYLBUTYRIC ACID              | CAS# 4026-18-0                        | (M)-H                                 | 2-HYDROXY-3-METHYLBUTYRIC ACID          | CAS# 4026-18-0   | (M)-H                                                                                                    | 2-HYDROXY-3-METHYLBUTYRIC ACID                      | CAS# 4026-18-0   | (M)-H         | 25        | -               | 118.6627  |          |            | 3.4881255      |
| 2-HYDROXY-4-(METHYLTHIO)BUTYRIC ACID        | CAS# 583-913-5                        | (M)-H                                 | 2-HYDROXY-4-(METHYLTHIO)BUTYRIC ACID    | CAS# 583-913-5   | (M)-H                                                                                                    | 2-HYDROXY-4-(METHYLTHIO)BUTYRIC ACID                | CAS# 583-913-5   | (M)-H         | 2         | -               | 150.0337  |          |            | 3.3519962      |
| 2-HYDROXYBUTYRATE                           | CAS# 106-57-0                         | (M)-H                                 | 2-HYDROXYBUTYRATE                       | CAS# 106-57-0    | (M)-H                                                                                                    | 2-HYDROXYBUTYRATE                                   | CAS# 106-57-0    | (M)-H         | 4         | -               | 104.0478  |          |            | 1.777481       |
| 2-METHYLACETYLACETATE                       | CAS# 1869-17-5                        | (M)-H                                 | 2-METHYLACETYLACETATE                   | CAS# 1869-17-5   | (M)-H                                                                                                    | 2-METHYLACETYLACETATE                               | CAS# 1869-17-5   | (M)-H         | 1         | -               | 185.9491  |          |            | 4.825264       |
| 2-METHYLMALATE                              | CAS# 498-23-7                         | (M)-H                                 | 2-METHYLMALATE                          | CAS# 498-23-7    | (M)-H                                                                                                    | 2-METHYLMALATE                                      | CAS# 498-23-7    | (M)-H         | 3         | -               | 102.0723  |          |            | 1.939443       |
| 2-OXOADIPATE                                | CAS# 3184-35-8                        | (M)-H                                 | 2-OXOADIPATE                            | CAS# 3184-35-8   | (M)-H                                                                                                    | 2-OXOADIPATE                                        | CAS# 3184-35-8   | (M)-H         | 1         | -               | 160.0356  |          |            | 1.600001       |
| 3-(4-HYDROXYPHENYL)ACETATE                  | CAS# 6482-93-4                        | (M)-H                                 | 3-(4-HYDROXYPHENYL)ACETATE              | CAS# 6482-93-4   | (M)-H                                                                                                    | 3-(4-HYDROXYPHENYL)ACETATE                          | CAS# 6482-93-4   | (M)-H         | 25        | -               | 182.0756  |          |            | 3.8730707      |
| 3,4-DITHIOVALINE                            | CAS# 55-DM-3                          | (M)-H                                 | 3,4-DITHIOVALINE                        | CAS# 55-DM-3     | (M)-H                                                                                                    | 3,4-DITHIOVALINE                                    | CAS# 55-DM-3     | (M)-H         | 1         | -               | 296.0877  |          |            | 1.2929988      |
| 3-HYDROXYBENZALDEHYDE                       | CAS# 99-50-3                          | (M)-H                                 | 3-HYDROXYBENZALDEHYDE                   | CAS# 99-50-3     | (M)-H                                                                                                    | 3-HYDROXYBENZALDEHYDE                               | CAS# 99-50-3     | (M)-H         | 1         | -               | 142.0464  |          |            | 2.025096       |
| 3-PHENYLAMINE                               | CAS# 59-92-7                          | (M)-H                                 | 3-PHENYLAMINE                           | CAS# 59-92-7     | (M)-H                                                                                                    | 3-PHENYLAMINE                                       | CAS# 59-92-7     | (M)-H         | 2         | -               | 107.0704  |          |            | 0.6704993      |
| 3,4-DIHYDROXYPHENYLACETATE                  | CAS# 102-32-9                         | (M)-H                                 | 3,4-DIHYDROXYPHENYLACETATE              | CAS# 102-32-9    | (M)-H                                                                                                    | 3,4-DIHYDROXYPHENYLACETATE                          | CAS# 102-32-9    | (M)-H         | 1         | -               | 168.0422  |          |            | 3.5270038      |
| 3,4-DIHYDROXYPHENYLETHYLENEGLYCOL           | CAS# 28822-73-3                       | (M)-H                                 | 3,4-DIHYDROXYPHENYLETHYLENEGLYCOL       | CAS# 28822-73-3  | (M)-H                                                                                                    | 3,4-DIHYDROXYPHENYLETHYLENEGLYCOL                   | CAS# 28822-73-3  | (M)-H         | 2         | -               | 170.0564  |          |            | 1.2264997      |
| 3'-CYCLIC AMP                               | CAS# 60-92-4                          | (M)-H                                 | 3'-CYCLIC AMP                           | CAS# 60-92-4     | (M)-H                                                                                                    | 3'-CYCLIC AMP                                       | CAS# 60-92-4     | (M)-H         | 2         | -               | 320.6506  |          |            | 2.025096       |
| 3,5-DIBROMO-4-HYDROXYBENZOTRIFURAN          | CAS# 1689-84-5                        | (M)-H                                 | 3,5-DIBROMO-4-HYDROXYBENZOTRIFURAN      | CAS# 1689-84-5   | (M)-H                                                                                                    | 3,5-DIBROMO-4-HYDROXYBENZOTRIFURAN                  | CAS# 1689-84-5   | (M)-H         | 1         | -               | 274.86    |          |            | 12.529603      |
| 317.9225(0.1930616)                         |                                       |                                       |                                         |                  | (317.7696, 2327.616)(318.1779, 1697.1886)(319.761, 25929.317)                                            | 317.9225(0.1930616)                                 |                  | FindByFormula | 7         | -               | 317.9225  |          |            | 19.306116      |
| 3BETA-HYDROXY-SALPHA-PREGNAN-20-ONE         | CAS# 516-55-2                         | (M)-H                                 | 3BETA-HYDROXY-SALPHA-PREGNAN-20-ONE     | CAS# 516-55-2    | (M)-H                                                                                                    | 3BETA-HYDROXY-SALPHA-PREGNAN-20-ONE                 | CAS# 516-55-2    | (M)-H         | 24        | -               | 370.1825  |          |            | 23.00424       |
| 3BETA-HYDROXY-5-EN-17-ONE-3-SULFATE         | CAS# 1                                | (M)-H                                 | 3BETA-HYDROXY-5-EN-17-ONE-3-SULFATE     | CAS# 1           | (M)-H                                                                                                    | 3BETA-HYDROXY-5-EN-17-ONE-3-SULFATE                 | CAS# 1           | (M)-H         | 5         | -               | 318.2539  |          |            | 21.089184      |
| 3-CMP                                       | CAS# 63-37-6                          | (M)-H                                 | 3-CMP                                   | CAS# 63-37-6     | (M)-H                                                                                                    | 3-CMP                                               | CAS# 63-37-6     | (M)-H         | 17        | -               | 323.0158  |          |            | 0.8807637      |
| 3-DEHYDROSHIMMATE                           | CAS# 2922-42-1                        | (M)-H                                 | 3-DEHYDROSHIMMATE                       | CAS# 2922-42-1   | (M)-H                                                                                                    | 3-DEHYDROSHIMMATE                                   | CAS# 2922-42-1   | (M)-H         | 5         | -               | 173.036   |          |            | 0.9125991      |
| 3-HYDROXY-3-METHYLGUTARATE                  | CAS# 503-49-1                         | (M)-H                                 | 3-HYDROXY-3-METHYLGUTARATE              | CAS# 503-49-1    | (M)-H                                                                                                    | 3-HYDROXY-3-METHYLGUTARATE                          | CAS# 503-49-1    | (M)-H         | 17        | -               | 162.0517  |          |            | 1.6098232      |
| 3-HYDROXYMETHYLADEOSINE                     | CAS# 2147-61-7                        | (M)-H                                 | 3-HYDROXYMETHYLADEOSINE                 | CAS# 2147-61-7   | (M)-H                                                                                                    | 3                                                   |                  |               |           |                 |           |          |            |                |

























|                    |        |        |        |        |        |        |        |        |        |        |        |        |       |       |        |        |        |        |        |        |        |       |        |        |        |        |  |
|--------------------|--------|--------|--------|--------|--------|--------|--------|--------|--------|--------|--------|--------|-------|-------|--------|--------|--------|--------|--------|--------|--------|-------|--------|--------|--------|--------|--|
| 769.5533@25.231102 | 56300  | 55389  | 62360  | 56671  | 23452  | 22292  | 23399  | 26228  | 30101  | 26463  | 85279  | 95100  | 68513 | 56910 | 114471 | 51974  | 71924  | 127643 | 95995  | 144189 | 17500  | 51560 | 48668  | 75155  | 41730  | 139050 |  |
| 771.3164@22.434029 | 5496   | 4406   | 4298   | 6214   | 79025  | 74743  | 73508  | 69488  | 66515  | 62429  | 7809   | 8538   | 3939  | 4619  | 3076   | 6939   | 6023   | 22500  | 26644  | 14395  | 22531  | 32945 | 13416  | 31886  | 22063  | 28507  |  |
| 772.1086@22.449924 | 21025  | 18590  | 20345  | 20560  | 17891  | 18639  | 19785  | 20327  | 20842  | 20028  | 14324  | 17069  | 12030 | 20694 | 17716  | 14977  | 23816  | 27162  | 28014  | 22500  | 26644  | 14395 | 22531  | 32945  | 13416  | 31886  |  |
| 773.3314@22.663164 |        | 2620   |        |        | 15410  | 14557  | 14319  | 12849  | 13028  | 11591  |        |        |       |       |        |        |        |        |        |        |        |       |        |        |        |        |  |
| 773.3329@22.743011 |        | 2684   |        |        | 61203  | 55465  | 60279  | 57799  | 55289  | 54485  |        |        |       |       |        |        |        |        |        |        |        |       |        |        |        |        |  |
| 773.335@22.795414  |        |        |        |        |        |        |        |        |        |        |        |        |       |       |        |        |        |        |        |        |        |       |        |        |        |        |  |
| 773.5369@24.573845 | 5272   | 4608   | 8032   | 6289   | 81558  | 77264  | 81345  | 93093  | 92767  | 79875  | 7733   | 8527   | 3189  |       | 11904  | 24700  | 34328  | 31743  | 41022  |        |        |       |        |        |        |        |  |
| 774.1318@22.694763 | 22113  | 19214  | 19101  | 26142  | 11377  | 11008  | 10651  | 9605   | 9807   | 9494   | 24859  | 22127  | 3976  | 11091 | 24019  | 19252  | 22658  | 27060  | 21314  | 28863  | 10828  | 25926 | 21969  |        |        |        |  |
| 774.1361@22.876322 |        |        |        |        |        |        |        |        |        |        |        |        |       |       |        |        |        |        |        |        |        |       |        |        |        |        |  |
| 774.5898@24.286057 | 7496   | 7712   | 6720   | 5445   | 56197  | 56009  | 57665  | 53928  | 55339  | 51077  | 7861   | 2948   | 2878  | 2890  | 2379   | 11217  | 15474  | 12458  | 17412  | 19542  |        | 10014 | 7894   |        |        |        |  |
| 775.5406@23.993422 | 6635   | 4900   | 4763   | 6329   | 39100  | 40146  | 39815  | 39608  | 40115  | 34996  | 8261   | 7488   |       |       |        |        |        |        |        |        |        | 9113  |        |        |        |        |  |
| 775.5501@25.273186 |        |        |        |        |        |        |        |        |        |        |        |        |       |       |        |        |        |        |        |        |        |       |        |        |        |        |  |
| 775.5523@25.12754  | 5553   | 9079   | 10307  | 9574   | 128489 | 122427 | 128645 | 131011 | 129607 | 122624 | 8519   |        |       |       |        |        |        |        |        |        |        |       |        |        |        |        |  |
| 776.1531@13.099658 | 31037  | 29303  | 34714  | 27471  | 9727   | 9229   | 12437  | 9495   | 13437  | 9803   | 27980  | 30305  | 21437 |       |        |        |        |        |        |        |        |       |        |        |        |        |  |
| 776.602@24.71119   | 18090  | 17515  | 18076  | 16412  | 18363  | 16753  |        |        |        |        | 19840  | 7475   |       |       |        |        |        |        |        |        |        |       |        |        |        |        |  |
| 777.5507@24.352367 | 24178  | 21771  | 21570  | 21793  | 82415  | 79425  | 77436  | 78248  | 81160  | 75832  | 48225  | 22793  |       |       |        |        |        |        |        |        |        |       |        |        |        |        |  |
| 779.5681@24.801208 | 55450  | 49958  | 54247  | 52170  | 22475  | 22294  | 26207  | 25164  | 29145  | 25696  | 100313 | 36351  | 1227  | 41309 | 28021  | 22308  | 60693  | 70542  | 102675 | 113762 | 138632 | 12562 | 79798  | 42974  |        |        |  |
| 780.4092@22.723911 | 15170  | 14633  | 14569  | 14182  | 56557  | 55124  | 54266  | 56661  | 57333  | 54267  | 12501  | 20808  |       |       |        |        |        |        |        |        |        |       |        |        |        |        |  |
| 782.2537@8.460257  | 74974  | 70302  | 70587  | 68495  | 19673  | 18813  | 20323  | 19392  | 18462  | 17778  | 60124  | 67865  | 42472 | 84386 | 59999  | 48007  | 38267  | 60325  | 110916 | 41645  | 67505  | 64804 | 112398 | 83263  | 176380 |        |  |
| 783.5687@25.759329 | 59650  | 56633  | 63691  | 60051  |        |        |        |        |        |        | 54130  | 68044  |       |       |        |        |        |        |        |        |        |       |        |        |        |        |  |
| 784.4399@22.926924 | 25023  | 25024  | 24773  | 24440  | 75555  | 69218  | 74927  | 72921  | 74563  | 71191  | 21877  | 44384  | 2107  | 16069 | 20436  | 8689   | 26096  | 40745  | 36860  | 41722  | 49683  | 2861  | 46778  | 37851  |        |        |  |
| 785.5021@8.227946  | 38233  | 35924  | 34911  | 36137  |        |        |        |        |        |        | 17197  | 6835   | 5209  | 8319  | 62529  | 25301  | 40663  | 30722  | 63733  | 17485  | 88834  | 19270 | 36277  | 67374  | 10743  |        |  |
| 785.5479@24.86617  | 76714  | 78922  | 81445  | 79037  | 216158 | 216213 | 223417 | 227999 | 238304 | 219313 | 126019 | 126196 | 2128  | 78904 | 76054  | 106094 | 108519 | 153651 | 285641 | 186174 | 420736 | 40146 | 77496  | 74242  |        |        |  |
| 785.5833@26.954992 | 48863  | 39875  | 52572  | 45971  |        |        |        |        |        |        | 37440  | 36714  |       |       |        |        |        |        |        |        |        |       |        |        |        |        |  |
| 786.4252@22.721195 | 22173  | 21184  | 21411  | 20661  | 97100  | 92947  | 93790  | 91851  | 97644  | 96851  | 15955  | 30296  |       |       |        |        |        |        |        |        |        |       |        |        |        |        |  |
| 787.5625@25.745083 | 54157  | 51227  | 61401  | 52711  |        |        |        |        |        |        | 40933  | 53850  |       |       |        |        |        |        |        |        |        |       |        |        |        |        |  |
| 787.5717@24.559904 |        |        |        |        |        |        |        |        |        |        |        |        |       |       |        |        |        |        |        |        |        |       |        |        |        |        |  |
| 787.5729@24.754206 |        |        |        |        |        |        |        |        |        |        |        |        |       |       |        |        |        |        |        |        |        |       |        |        |        |        |  |
| 788.4697@23.181292 | 14856  | 16281  | 14734  | 14247  | 12037  | 12822  | 12299  | 12745  | 12404  | 12744  | 16624  | 18207  | 8978  | 14567 | 11730  | 14376  | 14076  | 11568  | 11236  | 18127  | 19713  | 7183  | 21732  | 14579  | 5556   |        |  |
| 788.5303@23.708025 | 7691   | 8243   | 4549   | 3638   | 32514  | 28983  | 33190  | 30606  | 27103  | 28400  | 7531   | 3689   |       |       |        |        |        |        |        |        |        |       |        |        |        |        |  |
| 789.5494@24.23396  | 7680   | 4853   | 7503   | 6040   |        |        |        |        |        |        | 22903  |        |       |       |        |        |        |        |        |        |        |       |        |        |        |        |  |
| 789.5799@24.9088   |        |        |        |        |        |        |        |        |        |        |        |        |       |       |        |        |        |        |        |        |        |       |        |        |        |        |  |
| 789.5848@25.24628  |        |        |        |        |        |        |        |        |        |        |        |        |       |       |        |        |        |        |        |        |        |       |        |        |        |        |  |
| 789.9816@24.124975 |        |        |        |        |        |        |        |        |        |        |        |        |       |       |        |        |        |        |        |        |        |       |        |        |        |        |  |
| 789.982@23.816015  |        |        |        |        |        |        |        |        |        |        |        |        |       |       |        |        |        |        |        |        |        |       |        |        |        |        |  |
| 789.9827@24.123894 |        |        |        |        |        |        |        |        |        |        |        |        |       |       |        |        |        |        |        |        |        |       |        |        |        |        |  |
| 789.9832@23.233425 | 68741  | 92770  | 78774  | 91381  | 443012 | 228317 | 218700 | 192531 | 176410 | 195865 | 61689  | 144817 | 40345 | 87407 | 87712  | 89486  | 47370  | 101493 | 94139  | 74785  | 94531  | 91793 | 85331  | 108419 | 17242  |        |  |
| 789.9837@23.188755 | 68741  | 92770  | 78774  | 91381  | 245605 | 121899 | 97242  | 102273 | 91037  | 98089  | 92485  | 156423 | 40345 | 87407 | 87712  | 89486  | 47370  | 101493 | 94139  | 74785  | 94531  | 91793 | 85331  | 108419 | 17242  |        |  |
| 789.9851@23.19702  | 68741  | 92770  | 78774  | 91381  |        |        |        |        |        |        |        |        |       |       |        |        |        |        |        |        |        |       |        |        |        |        |  |
| 789.9853@23.433258 |        |        |        |        |        |        |        |        |        |        |        |        |       |       |        |        |        |        |        |        |        |       |        |        |        |        |  |
| 790.4564@22.92349  | 35458  | 34257  | 35514  | 35207  | 129117 | 122409 | 130732 | 125813 | 131975 | 129647 | 33511  | 64827  |       |       |        |        |        |        |        |        |        |       |        |        |        |        |  |
| 790.4627@23.183979 |        |        |        |        |        |        |        |        |        |        |        |        |       |       |        |        |        |        |        |        |        |       |        |        |        |        |  |
| 791.5117@24.541157 | 23862  | 23922  | 22449  | 23225  | 135181 | 139094 | 141757 | 137875 | 150686 | 132872 | 37126  | 15132  |       |       |        |        |        |        |        |        |        |       |        |        |        |        |  |
| 791.5359@24.590044 |        |        |        |        |        |        |        |        |        |        |        |        |       |       |        |        |        |        |        |        |        |       |        |        |        |        |  |
| 791.5372@24.788036 |        |        |        |        |        |        |        |        |        |        |        |        |       |       |        |        |        |        |        |        |        |       |        |        |        |        |  |
| 792.1075@22.582975 | 25961  | 26352  | 24604  | 27895  | 35133  | 34889  | 35949  | 38757  | 34523  | 36830  | 28363  | 41485  | 5075  | 19615 | 24071  | 11193  | 22544  | 39474  | 36537  | 30041  | 32847  | 7419  | 31085  | 31722  | 1645   |        |  |
| 793.3004@22.121735 | 3962   |        |        |        | 2721   | 20465  | 18432  | 20106  | 20056  | 18827  | 18201  | 4245   | 4026  |       |        |        |        |        |        |        |        |       |        |        |        |        |  |
| 793.4574@25.23036  | 3224   | 1544   | 3667   |        | 49722  | 46521  | 50464  | 57971  | 57187  | 53829  |        |        |       |       |        |        |        |        |        |        |        |       |        |        |        |        |  |
| 794.1233@22.874426 | 61254  | 59329  | 62150  | 58441  | 24890  | 34360  | 20330  | 20514  | 22823  | 18576  | 58677  | 67387  | 70597 | 74351 | 63033  | 71819  | 70521  | 19254  | 66738  | 56910  | 38433  | 67464 | 39470  | 64641  | 72719  |        |  |
| 794.4872@23.182186 | 12604  | 14501  | 15370  | 13995  | 14674  | 14977  | 15632  | 16385  | 14215  | 15718  | 18052  | 19500  | 8130  | 11970 | 9214   | 13502  | 13060  | 10766  | 11456  | 18711  | 18620  | 6274  | 22185  | 12588  | 3289   |        |  |
| 795.4708@25.864923 | 4211   | 5255   | 4244   | 3993   | 30391  | 30402  | 33655  | 32372  | 35150  | 34942  | 9998   | 1359   |       |       |        |        |        |        |        |        |        |       |        |        |        |        |  |
| 796.17@1.0048324   |        |        |        |        |        |        |        |        |        |        |        |        |       |       |        |        |        |        |        |        |        |       |        |        |        |        |  |
| 796.3649@22.58109  | 4556   | 3841   | 5144   | 4966   | 16859  | 14080  | 15008  | 16709  | 15798  | 14161  | 5051   | 12759  |       |       |        |        |        |        |        |        |        |       |        |        |        |        |  |
| 796.3704@22.851322 |        |        |        |        |        |        |        |        |        |        |        |        |       |       |        |        |        |        |        |        |        |       |        |        |        |        |  |
| 797.5844@26.244934 | 140950 | 138122 | 162390 | 136566 |        |        |        |        |        |        |        |        |       |       |        |        |        |        |        |        |        |       |        |        |        |        |  |
| 798.126@22.58789   | 15321  | 17054  | 16478  | 17652  | 20960  | 21892  | 20434  | 21160  | 22425  | 22704  | 13366  | 29598  | 3851  | 15091 | 14450  | 14059  | 14267  | 22983  | 25104  | 20051  | 20926  | 2050  | 19273  | 16134  |        |        |  |
| 798.6694@16.161427 |        |        |        |        |        |        |        |        |        |        |        |        |       |       |        |        |        |        |        |        |        |       |        |        |        |        |  |
| 799.5634@25.208157 | 63285  | 64937  | 69253  | 69130  | 34560  | 36771  | 37643  | 31475  | 32091  | 33357  |        |        |       |       |        |        |        |        |        |        |        |       |        |        |        |        |  |
| 799.5993@27.654818 | 86199  | 79179  | 81510  | 67967  |        |        |        |        |        |        |        |        |       |       |        |        |        |        |        |        |        |       |        |        |        |        |  |
| 800.1383@22.869429 | 61730  | 59132  | 63289  | 56618  | 24263  | 24135  | 39141  | 22005  | 20569  | 23470  | 53142  | 55078  | 57672 |       |        |        |        |        |        |        |        |       |        |        |        |        |  |
| 800.3695@15.587159 | 31716  | 30960  | 30217  | 29750  |        |        |        |        |        |        |        |        |       |       |        |        |        |        |        |        |        |       |        |        |        |        |  |
| 800.3953@22.848757 | 74770  | 73435  | 73228  | 71705  | 93041  | 82961  | 94430  | 87127  | 92370  | 88580  | 65746  | 77923  | 52452 | 68451 | 57389  | 58802  | 76625  | 73797  | 74849  | 84082  | 91959  | 44519 | 91521  | 80753  | 32854  |        |  |
| 801.5529@24.131777 | 9036   | 7551   | 8445   | 7030   | 121827 | 118983 | 1      |        |        |        |        |        |       |       |        |        |        |        |        |        |        |       |        |        |        |        |  |

|                     |       |       |       |       |        |        |        |        |        |        |       |       |       |       |       |        |        |        |        |        |        |       |       |        |       |        |        |        |  |
|---------------------|-------|-------|-------|-------|--------|--------|--------|--------|--------|--------|-------|-------|-------|-------|-------|--------|--------|--------|--------|--------|--------|-------|-------|--------|-------|--------|--------|--------|--|
| 855.5999@25.083378  | 43810 | 42399 | 45096 | 42852 | 674007 | 651378 | 657982 | 648049 | 662312 | 625054 | 63492 | 19110 | 11083 | 82824 | 73937 | 105226 | 74700  | 164864 | 7894   | 43808  | 32318  | 43469 | 12682 | 140243 |       |        |        |        |  |
| 856.4573@23.18165   | 28941 | 29538 | 27735 | 27003 | 25882  | 23806  | 25504  | 23039  | 25299  | 25463  | 34345 | 38642 | 17302 | 25990 | 24780 | 27214  | 25418  | 23294  | 22892  | 35222  | 37950  | 13158 | 40842 | 27657  | 11278 | 29673  | 55347  | 29434  |  |
| 856.5126@23.707132  | 4444  |       |       |       | 20296  | 18979  | 18493  | 22158  | 21615  | 19731  | 3221  | 1843  |       |       |       |        | 4377   | 7742   | 7782   | 8747   | 15486  |       | 8563  | 4427   |       | 7891   |        | 14328  |  |
| 856.6719@25.828072  | 25231 | 24135 | 29182 | 26337 | 70996  | 70297  | 73837  | 71079  | 75243  | 66774  | 39904 | 19293 |       | 14305 | 15011 | 42249  | 47848  | 51981  | 69398  | 89827  | 6116   | 42604 | 30017 | 36196  | 14525 | 85007  |        |        |  |
| 857.6144@25.13311   |       |       |       |       |        |        |        |        |        |        |       |       |       |       |       |        |        |        |        |        |        |       |       |        |       |        |        |        |  |
| 857.6148@25.444185  | 9002  | 12481 | 9593  | 9517  | 239142 | 213162 | 238313 | 230896 | 232577 | 205370 | 5067  | 3031  |       |       |       | 19058  | 18824  | 24119  | 34049  | 32214  |        | 13002 | 8232  |        | 16970 |        | 27525  |        |  |
| 858.4442@22.92771   | 25118 | 24870 | 26565 | 25891 | 89313  | 86766  | 88132  | 87801  | 89220  | 88303  | 23351 | 47802 |       | 16373 | 21046 | 9172   | 27894  | 46667  | 41863  | 50701  | 59884  |       | 53810 | 39407  |       | 52822  | 31724  | 71096  |  |
| 859.5004@24.543152  | 14298 | 16716 | 15778 | 14953 |        |        |        |        |        |        | 22213 | 9776  |       | 12726 | 11234 | 7693   | 24435  | 24587  | 42257  | 38891  | 65694  |       | 21946 | 13530  |       | 22796  | 11323  | 58524  |  |
| 860.0948@22.581999  | 19136 | 17966 | 19142 | 18241 | 24148  | 24620  | 24665  | 24262  | 24879  | 22906  | 19958 | 27546 | 4804  | 14138 | 20569 | 7202   | 16666  | 26123  | 24544  | 18926  | 18016  | 7324  | 21437 | 22673  |       | 23200  | 16020  | 28860  |  |
| 862.1093@22.847621  | 32552 | 28484 | 31742 | 29454 | 8086   | 8868   | 8509   | 12169  | 9944   | 13864  | 26218 | 27260 | 34385 | 33509 | 30238 | 33384  | 35514  | 28323  | 32195  | 19426  | 14194  | 36970 | 16887 | 24598  | 36432 | 25615  | 17908  | 20265  |  |
| 862.3615@22.861217  | 16946 | 17246 | 16257 | 16015 | 12980  | 16839  | 13853  | 15087  | 16990  | 14200  | 16657 | 17419 | 18279 | 16037 | 12701 | 15096  | 18519  | 16131  | 19939  | 15871  | 17321  | 12270 | 18100 | 18377  | 10452 | 17133  | 15924  | 17506  |  |
| 862.4706@22.896145  |       |       |       |       |        |        |        |        |        |        | 1350  |       |       |       |       |        |        |        |        |        |        |       |       |        |       |        |        |        |  |
| 862.4753@23.181692  | 17114 | 16380 | 15148 | 14966 |        | 13634  | 13338  | 11845  |        | 24127  | 7912  |       |       | 14765 | 15760 | 13409  |        | 19945  | 24909  | 7462   | 22602  | 14878 | 4231  | 18209  | 29691 |        | 18209  | 29691  |  |
| 864.353@22.580797   | 3861  | 3542  | 4069  |       | 16770  | 12572  | 13548  | 14153  | 13390  | 12560  | 3878  | 11498 |       | 2342  | 3950  | 2494   | 6692   | 7265   | 5767   | 6423   |        | 4823  | 4693  |        | 6638  | 2771   | 14900  |        |  |
| 868.1262@22.870573  | 30334 | 26566 | 25965 | 28885 | 17264  | 10150  | 10078  | 10000  | 10526  | 16214  | 27987 | 29208 | 26482 | 27833 | 27721 | 27132  | 29501  | 30186  | 29346  | 14171  | 22458  | 27137 | 12787 | 26147  | 25823 | 13497  | 25939  | 13927  |  |
| 868.3824@22.852972  | 51055 | 51266 | 51134 | 50950 | 56096  | 53597  | 55753  | 55851  | 54997  | 52479  | 44840 | 53158 | 38199 | 48466 | 39983 | 43204  | 54368  | 53668  | 51315  | 53319  | 57990  | 31945 | 58451 | 54728  | 25122 | 58152  | 53734  | 56751  |  |
| 869.2725@3.5984445  | 13394 | 13229 | 12555 | 12453 | 54983  | 59677  | 61852  | 62577  | 67516  | 62704  |       |       |       | 14299 | 20983 | 154439 | 192541 | 55137  | 71377  | 6265   | 24440  | 41833 |       |        |       | 118214 | 3605   | 152956 |  |
| 871.5551@24.4953    | 61487 | 59610 | 57019 | 58210 | 745787 | 713967 | 706952 | 741603 | 710276 | 64921  | 31026 |       |       | 28771 | 22902 | 8365   | 10146  | 142074 | 167847 | 228269 | 6689   | 68355 | 42645 |        | 93122 | 2625   | 183518 |        |  |
| 871.5902@22.725449  |       |       |       |       | 29659  | 28298  | 29888  | 30061  | 31009  | 29411  |       |       |       |       |       |        |        |        |        |        |        |       |       |        |       |        |        |        |  |
| 872.2861@13.0997305 | 34949 | 31072 | 31172 | 30129 | 5111   | 5549   | 5340   | 4624   | 5146   | 5045   | 25513 | 30748 | 16140 | 38712 | 24778 | 19832  | 14332  | 26219  | 42015  | 14205  | 25465  | 32888 | 50090 | 35596  | 77484 | 63563  | 56594  | 33564  |  |
| 872.3943@22.709047  | 14449 | 13657 | 14079 | 14438 | 16370  | 15681  | 16073  | 15349  | 15873  | 13853  | 15478 | 17055 |       | 3905  | 11432 | 6449   | 10536  | 32679  | 23806  | 24385  | 34000  | 2262  | 29191 | 15764  |       | 5647   | 14475  | 33478  |  |
| 873.5710@24.92519   | 50488 | 48417 | 46482 | 48021 | 385998 | 374787 | 373329 | 368789 | 377249 | 365812 | 68886 | 30764 |       | 29934 | 24989 | 11468  | 74651  | 85067  | 119123 | 115379 | 164503 | 7085  | 59815 | 47460  |       | 55941  | 21874  | 155083 |  |
| 874.4002@22.849009  | 43555 | 46370 | 44779 | 42730 | 57563  | 50993  | 57132  | 54564  | 55746  | 54529  | 41249 | 50496 | 30001 | 41793 | 33910 | 35310  | 48187  | 47667  | 45821  | 54265  | 59455  | 25191 | 59274 | 48858  | 18481 | 54903  | 55441  | 53540  |  |
| 874.651@22.847902   | 15630 | 15595 | 15956 | 16211 | 23481  | 21605  | 24174  | 23134  | 24641  | 24310  | 13364 | 18673 | 11209 | 14791 | 9742  | 12580  | 16187  | 16519  | 16762  | 21049  | 23778  | 7804  | 22532 | 19110  | 6344  | 21633  | 22091  | 21074  |  |
| 875.258@22.252308   | 4076  | 4571  | 3892  |       | 18680  | 16719  | 19149  | 16396  | 16161  | 16169  | 3299  | 2693  |       |       |       | 1676   | 2193   |        | 4439   | 3779   | 8187   | 7912  | 1764  | 1458   | 3111  |        | 1565   | 2467   |  |
| 875.26@22.325977    |       |       |       |       |        |        |        |        |        |        |       |       |       |       |       |        |        |        |        |        |        |       |       |        |       |        |        |        |  |
| 877.4398@22.829332  | 14520 | 10896 | 12922 | 11225 | 8080   | 7565   | 9090   | 9408   |        |        | 15643 | 11640 | 8144  | 11887 | 18291 | 15183  | 9058   | 10348  | 5959   | 8584   | 9456   | 12339 | 15719 | 10983  | 9362  | 10430  | 15263  | 9538   |  |
| 877.5748@24.456886  |       |       |       |       | 36732  | 35410  | 31485  | 37877  | 30616  | 29446  |       |       |       |       |       |        |        |        |        |        |        |       |       |        |       |        |        |        |  |
| 877.8291@0.5838698  | 36612 | 37289 | 37589 | 36840 | 3184   |        |        |        |        |        | 32589 | 10651 | 39245 | 26368 | 25226 | 22196  | 28579  | 30172  | 21376  | 30715  | 34711  | 46348 | 37499 | 27346  | 36476 | 25100  | 30024  | 26810  |  |
| 878.4136@22.711048  | 11492 | 11726 | 12449 | 11644 | 14550  | 13221  | 15300  | 13867  | 15214  | 14822  | 11586 | 14406 |       | 2957  | 7678  | 4285   | 8125   | 32228  | 20731  | 23587  | 37130  |       |       |        |       | 14109  | 11048  | 35760  |  |
| 878.5307@24.134247  | 18212 | 14216 | 13264 | 12495 | 15762  | 16475  | 16656  | 12925  | 17667  | 16081  | 16106 | 9918  |       | 7906  | 8246  | 4784   | 24964  | 21500  | 28945  | 33079  | 40085  | 2911  | 22933 | 15219  |       | 21989  | 9692   | 36762  |  |
| 879.5989@24.969696  |       |       |       |       | 122179 | 120244 | 118548 | 119469 | 117183 | 115475 |       |       |       |       |       |        |        |        |        |        |        |       |       |        |       |        |        |        |  |
| 880.3095@22.448568  | 9045  | 9154  | 14435 | 9351  | 11772  | 12579  | 12390  | 16200  | 11560  | 16416  | 5200  | 8950  | 4783  | 7122  | 4703  | 5603   | 12775  | 13883  | 16455  | 11269  | 14790  | 4246  | 16351 | 14441  | 3474  | 24329  | 10836  | 18059  |  |
| 880.6714@22.87451   | 18641 | 17888 | 19832 | 19849 | 28852  | 26752  | 27972  | 27262  | 29245  | 30812  | 15973 | 19314 | 13481 | 18328 | 14062 | 15255  | 19340  | 19330  | 20206  | 24629  | 27744  | 9621  | 26268 | 20873  | 8856  | 24857  | 25619  | 21226  |  |
| 881.2764@22.30472   | 8449  | 8251  | 8770  | 8229  | 93695  | 88541  | 86715  | 88145  | 85182  | 92119  | 7524  | 5361  |       | 3069  | 6910  | 6776   | 10564  | 9455   | 17670  | 17807  |        | 9634  | 6963  |        |       | 6074   | 4323   | 14305  |  |
| 881.2784@22.259848  | 9219  | 8318  | 8748  | 7414  | 26686  | 27888  | 24434  | 25657  | 23817  | 25821  | 6960  | 5046  |       |       |       | 6698   | 6554   | 10564  | 11697  | 17148  | 3950   |       |       |        |       | 7242   |        |        |  |
| 881.28@22.323523    |       |       |       |       | 32424  | 29441  | 33416  |        | 33197  | 31885  |       |       |       |       |       |        |        |        |        |        |        |       |       |        |       |        |        |        |  |
| 881.5753@24.849968  |       |       |       |       | 64541  | 61586  | 65998  | 66827  | 67978  | 58590  |       |       |       |       |       |        |        |        |        |        |        |       |       |        |       |        |        |        |  |
| 881.6139@25.22479   |       |       |       |       |        |        |        |        |        |        |       |       |       |       |       |        |        |        |        |        |        |       |       |        |       |        |        |        |  |
| 882.4112@16.984701  | 22498 | 20458 | 20434 | 20425 |        |        |        |        |        |        |       |       |       |       |       |        |        |        |        |        |        |       |       |        |       |        |        |        |  |
| 882.5337@23.808203  | 3534  | 3715  | 3903  | 4898  | 45075  | 44711  | 45166  | 42573  | 43702  | 37496  | 3120  | 1678  |       |       |       |        |        |        |        |        |        |       |       |        |       |        |        |        |  |
| 884.1239@23.180204  | 20674 | 21477 | 22785 | 19100 | 18475  | 18201  | 20731  | 19948  | 18356  | 20022  | 22776 | 21558 | 20903 | 20236 | 20136 | 22243  | 19655  | 18203  | 19432  | 20899  | 21615  | 19888 | 22072 | 20517  | 15956 | 22929  | 22476  | 23195  |  |
| 884.5485@24.132364  | 72629 | 62156 | 64771 | 61814 | 73475  | 67997  | 72364  | 65588  | 76096  | 71548  | 76724 | 39825 |       | 31788 | 21329 | 16370  | 116974 | 92678  | 136132 | 140878 | 176955 | 11674 | 90130 | 61210  |       | 84543  | 45114  | 167001 |  |
| 884.6832@22.728521  | 8865  | 9078  | 9657  | 10188 | 27790  | 24184  | 26249  | 28156  | 28756  | 30854  | 7669  | 11960 |       | 2784  | 4701  | 1681   | 6961   | 14985  | 10775  | 16449  | 12501  |       | 12465 | 10449  |       | 13304  | 11586  | 12525  |  |
| 886.1106@22.738554  | 28200 | 27663 | 26409 | 29140 | 15517  | 13576  | 15286  | 13142  | 19113  | 18005  | 22741 | 26672 | 9379  | 20126 | 25320 | 15579  | 25376  | 26531  | 27524  | 28276  | 22217  | 12669 | 26983 | 26871  | 2833  | 29188  | 28719  | 22967  |  |
| 888.126@22.948214   | 37640 | 36243 | 36486 | 37234 | 24281  | 18380  | 19651  | 20759  | 20318  | 20173  | 33874 | 35174 |       | 14259 | 33721 | 29278  | 37124  | 40834  | 37974  | 33665  | 33763  | 18286 | 36805 | 36726  | 4903  | 37103  | 33782  | 23271  |  |
| 888.4174@23.04077   |       |       |       |       | 31676  | 29528  | 34583  | 32779  | 33369  | 33685  |       |       |       |       |       |        |        |        |        |        |        |       |       |        |       |        |        |        |  |
| 888.5404@22.979513  | 6154  | 5642  | 7185  | 6268  | 9475   | 9309   | 9411   | 10119  | 8948   | 8846   | 4865  | 6405  | 5674  | 6435  | 5937  | 6047   | 7916   | 10892  |        | 6893   | 7147   | 6125  | 6600  | 6262   | 7069  | 8368   | 5360   | 10394  |  |
|                     |       |       |       |       |        |        |        |        |        |        |       |       |       |       |       |        |        |        |        |        |        |       |       |        |       |        |        |        |  |



|                     |         |         |         |         |        |        |        |        |        |        |        |         |        |        |         |         |         |          |          |         |         |         |         |         |        |          |          |         |         |        |       |        |
|---------------------|---------|---------|---------|---------|--------|--------|--------|--------|--------|--------|--------|---------|--------|--------|---------|---------|---------|----------|----------|---------|---------|---------|---------|---------|--------|----------|----------|---------|---------|--------|-------|--------|
| C14 H16 N2 O4       | 44343   | 43729   | 42853   | 44275   |        | 7090   | 2827   | 2734   | 15937  | 23736  | 3215   | 13963   | 10736  | 21496  | 39572   | 272375  | 210295  | 46944    |          | 29321   | 69398   | 79588   |         | 115198  | 38940  | 147916   |          |         |         |        |       |        |
| C14 H16 N2 O5       | 40883   | 39918   | 38169   | 38351   |        |        | 1130   |        | 11660  | 15653  | 1364   | 10106   | 7983   | 15139  | 39724   | 161701  | 181900  | 42074    | 42453    | 26712   | 65587   | 70394   | 3511    | 109459  | 37590  | 136587   |          |         |         |        |       |        |
| C14 H17 N O8        | 134668  | 143275  | 138047  | 139485  | 283809 | 286006 | 280920 | 273843 | 417614 | 271962 | 95986  | 26272   | 12407  |        | 82475   | 9534    |         | 1012     |          |         | 71159   | 1460654 |         |         |        |          |          |         |         |        |       |        |
| C14 H18 O4          | 57848   | 42337   | 48096   | 45655   | 72637  | 62117  | 56390  | 42081  | 45342  | 46466  | 48186  | 53261   | 47446  | 43938  | 43751   | 40458   | 48538   | 46771    | 42379    | 45499   | 26502   | 46478   | 49100   | 58496   | 50123  | 46043    | 43784    | 45557   |         |        |       |        |
| C14 H20 O P2 S      | 295817  | 287119  | 280687  | 278740  | 88647  | 80755  | 87291  | 84956  | 85599  | 82738  | 288053 | 347327  | 190484 | 436508 | 378185  | 297323  | 173481  | 417639   | 212379   | 310630  | 263837  | 410514  | 356940  | 362488  | 536136 | 450129   | 379158   |         |         |        |       |        |
| C14 H21 N O3        | 68084   | 65481   | 64193   | 66901   | 147864 | 146066 | 186014 | 174463 | 169828 | 163465 | 53452  | 74758   | 57537  | 56024  | 77441   | 59770   | 64416   | 25913    | 46626    | 60315   | 64089   | 52684   | 79671   | 59422   | 10342  | 82619    | 89209    | 76514   |         |        |       |        |
| C14 H21 O3 P3       |         |         |         |         | 70562  | 68555  | 70791  | 68629  | 71012  | 67402  |        |         |        |        |         |         |         |          |          |         |         |         |         |         |        |          |          |         |         |        |       |        |
| C14 H22 N2 O5 S     | 450506  | 458847  | 444403  | 444716  |        |        |        |        | 461966 | 17829  | 98754  | 94149   | 59757  | 67151  | 1237984 | 1271081 | 2160846 | 479730   | 598104   | 126457  | 212901  | 1178307 | 58131   | 461524  | 18979  | 486800   |          |         |         |        |       |        |
| C14 H22 O4 S        | 157600  | 149800  | 148267  | 141516  |        |        |        |        |        |        | 157558 | 135767  |        |        |         |         |         |          |          |         |         |         |         |         | 414839 | 118125   | 446678   |         |         |        |       |        |
| C14 H23 N6 O8 P S2  |         | 1702    |         |         | 85024  | 78584  | 90461  | 80998  | 80004  | 78212  |        | 1680    |        |        |         | 11936   |         |          |          |         |         |         |         |         |        |          |          |         |         |        |       |        |
| C14 H23 N6 O9 P S3  | 129777  | 122531  | 126073  | 116358  | 81220  | 78697  | 77226  | 75884  | 77470  | 76076  | 123044 | 134597  | 115598 | 138964 | 115877  | 114110  | 107538  | 121220   | 132031   | 101844  | 117081  | 128025  | 142301  | 126739  | 161925 | 146867   | 149763   | 122029  |         |        |       |        |
| C14 H23 O5 P S      | 206650  | 198553  | 197647  | 192983  | 88527  | 97405  | 73856  | 87206  | 85763  | 94236  | 174081 | 336604  | 179258 | 179258 | 315622  | 209538  | 125578  | 261752   | 391097   | 244562  | 418311  | 98087   | 304363  | 178680  | 208598 | 176880   | 208598   | 327021  |         |        |       |        |
| C14 H24 N2 S4       |         | 7411    |         | 12808   | 26773  | 29914  | 28798  | 31819  | 30698  | 27831  |        | 37317   | 3922   | 11798  |         | 7630    | 8118    | 20279    | 6505     | 7914    | 4723    | 7573    |         |         |        |          |          | 12494   |         |        |       |        |
| C14 H26 N6 O2       | 27969   | 17987   | 29492   | 31101   | 23622  | 21477  | 22217  | 23782  | 14892  | 23064  | 15701  |         | 8130   | 20669  |         |         | 26298   | 31894    | 25141    | 33123   | 9463    | 47814   | 18442   | 7889    | 38909  | 18453    | 25634    |         |         |        |       |        |
| C14 H26 O2          | 7231    | 9645    | 9193    | 10074   | 36885  | 33737  | 36332  | 38543  | 41627  | 36754  | 2556   | 13382   |        | 4673   | 3454    | 2491    | 5509    | 23589    | 33558    | 18297   | 16984   | 1743    | 10849   | 10848   |        | 23972    | 6256     | 33686   |         |        |       |        |
| C14 H28 O2          | 243241  | 240315  | 261855  | 255355  | 416520 | 409432 | 422724 | 431162 | 475278 | 441157 | 176395 | 289097  | 128810 | 186099 | 144892  | 123190  | 305207  | 370082   | 424314   | 317387  | 386131  | 98708   | 372158  | 330462  | 84384  | 491566   | 274628   | 413358  |         |        |       |        |
| C14 H28 O3          | 22952   | 21639   | 21695   | 20157   | 10284  | 9627   | 11013  | 10699  | 13435  | 11072  | 7707   | 17974   | 5094   | 7564   | 6890    | 4239    | 28653   | 36333    | 53843    | 38641   | 32433   | 5048    | 40761   | 33554   | 3985   | 56570    | 12678    | 32747   |         |        |       |        |
| C14 H30 N6 O        | 116106  | 130902  | 112080  | 117427  | 124101 | 119533 | 132182 | 116711 | 121520 | 108671 | 91997  | 158031  | 150354 | 85441  | 65375   | 78134   | 144120  | 192530   | 353380   | 162034  | 186262  | 58458   | 216636  | 207829  | 91129  | 241669   | 131268   | 199253  |         |        |       |        |
| C14 H33 N6 O9 P     | 139486  | 142483  | 141284  | 135789  | 176061 | 164099 | 174429 | 169043 | 183713 | 175990 | 129033 | 156027  | 96947  | 133858 | 119309  | 115452  | 142188  | 150367   | 144415   | 169953  | 179657  | 89869   | 185527  | 152854  | 72814  | 166980   | 173091   | 168386  |         |        |       |        |
| C14 H5 N4 O2 P S4   |         | 6741    | 6024    | 5077    | 316898 | 311319 | 307718 | 305098 | 313090 | 304718 |        |         |        |        |         |         |         |          |          |         | 1208    |         |         |         |        |          |          | 13957   |         |        |       |        |
| C14 H6 C12 N O5 P   | 171593  | 208341  | 212467  | 197808  |        |        |        |        |        |        | 466647 | 81675   | 340912 | 26873  | 196187  | 356624  | 147690  | 107715   | 226553   | 408859  | 240442  | 241200  | 239257  |         | 242427 | 210803   | 89721    |         |         |        |       |        |
| C14 H9 C12 N2 P3 S2 | 71258   | 67219   | 68197   | 64835   |        |        |        |        |        |        |        |         |        |        |         |         |         |          |          |         | 30816   |         |         |         |        |          |          |         |         |        |       |        |
| C15 H12 N2 O6 S     |         |         |         |         | 250665 | 247810 | 251509 | 247410 | 246357 | 248488 |        |         |        |        |         |         |         |          |          |         |         |         |         |         |        |          |          |         |         |        |       |        |
| C15 H14 O3          | 9549    | 15933   | 11001   | 15533   | 92890  | 93689  | 95920  | 99556  | 98150  | 97679  |        |         |        |        |         |         |         |          |          |         | 23243   |         | 124952  |         |        |          |          | 18839   |         |        |       |        |
| C15 H15 N7 O5       | 4393642 | 4363504 | 4345424 | 4198811 | 31984  | 33517  | 33525  | 31082  | 31913  | 31107  | 406789 | 2536794 | 39897  | 473361 | 602866  | 2251814 | 3921067 | 1.03E+07 | 1.04E+07 | 4086773 | 2451420 | 1002173 | 9148655 | 9359058 | 36030  | 1.01E+07 | 3609234  | 8320599 |         |        |       |        |
| C15 H15 N9 O        | 49623   | 45489   | 47756   | 43195   | 30481  | 29505  | 29593  | 27649  | 28265  | 27221  | 39856  | 39710   | 32973  | 43586  | 42677   | 34998   | 35643   | 63695    | 37612    | 50285   | 45115   | 57971   | 47881   | 62621   | 66746  | 55602    | 52649    |         |         |        |       |        |
| C15 H16 N10         | 37184   | 34343   | 34883   | 35267   | 44988  | 45369  | 43018  | 42824  | 43642  | 43914  | 32095  | 32821   | 21793  | 32699  | 32080   | 26473   | 28483   | 37285    | 58558    | 32166   | 38443   | 32423   | 29868   | 34988   | 45158  | 51283    | 37010    | 37191   |         |        |       |        |
| C15 H16 N4 O        |         |         |         |         | 416099 | 421104 | 427842 | 428704 | 435107 | 413353 |        |         |        |        |         |         |         |          |          |         |         | 5321    |         |         |        |          |          | 2802    |         |        |       |        |
| C15 H16 N4 O S      |         |         |         |         | 77335  | 73759  | 75827  | 71120  | 78632  | 80832  | 85084  | 82575   | 82064  | 76365  | 26841   | 62951   | 17892   | 35173    | 37286    | 24212   | 98555   | 135614  | 190830  | 101273  | 144253 | 20534    | 149980   | 135624  | 12787   | 175885 | 57874 | 128009 |
| C15 H17 N12 O7 P S  |         |         |         |         | 29861  | 32655  | 31349  | 29810  | 31299  | 28602  |        |         |        |        |         |         |         |          |          |         |         | 9123    |         |         |        |          |          |         | 18235   |        |       |        |
| C15 H18 N6 P2       | 60892   | 63066   | 57334   | 58547   | 39750  | 39082  | 40999  | 43063  | 42021  | 45162  | 62779  | 62438   | 53799  | 64288  | 59322   | 55281   | 55739   | 60895    | 75855    | 59714   | 69597   | 62579   | 71165   | 69965   | 72233  | 74640    | 71350    | 73553   |         |        |       |        |
| C15 H20 N6 O11      |         |         |         |         | 408773 | 395212 | 387355 | 426986 | 430846 | 429665 |        |         |        |        |         |         |         |          |          |         |         |         |         |         |        |          |          |         | 1168    |        |       |        |
| C15 H20 O5          |         |         |         |         | 57478  | 55453  | 57771  | 67647  | 65116  | 54590  |        |         |        |        |         |         |         |          |          |         |         |         |         |         |        |          |          |         |         |        |       |        |
| C15 H21 N10 O3 P3   |         |         |         |         | 198789 | 200327 | 168811 | 174641 | 179315 | 183937 |        |         |        |        |         |         |         |          |          |         |         |         |         |         |        |          |          |         |         |        |       |        |
| C15 H22 O2          | 317922  | 333396  | 328479  | 324229  | 340788 | 332789 | 345496 | 339811 | 356532 | 336945 | 335387 | 327984  | 330063 | 332065 | 333666  | 322614  | 333617  | 335342   | 354504   | 343716  | 316898  | 337918  | 336240  | 327325  | 330856 | 36030    | 1.01E+07 | 3609234 | 8320599 |        |       |        |
| C15 H22 O6          | 226101  | 219336  | 217431  | 215407  | 12409  | 9966   | 10986  | 10986  | 10986  | 16960  | 16960  | 16960   | 17972  | 17796  | 225885  | 174953  | 301797  | 160972   | 210764   | 299329  | 234564  | 256850  | 177341  | 248708  | 242243 | 173714   | 197232   | 221805  | 262128  |        |       |        |
| C15 H24 N3 O6 P S   | 55410   | 56017   | 59376   | 58029   | 1461   |        |        | 3104   |        |        | 71049  | 104177  | 43560  | 44808  | 83385   | 85738   | 30092   | 26356    | 46426    | 20684   | 16432   | 31369   | 49420   | 47394   | 31284  | 127177   | 73392    | 21918   |         |        |       |        |
| C15 H24 N5 O3 P3    | 29247   | 28279   | 25386   | 27071   | 46488  | 41594  | 41695  | 35432  | 32495  | 34155  | 39914  | 63800   | 50447  | 58476  | 64608   | 52630   | 4182    | 6454     | 17655    | 6815    | 11896   | 48098   | 34705   | 15466   | 77096  | 11081    | 69192    | 13629   |         |        |       |        |
| C15 H24 O4 S3       |         | 4557    |         |         | 110896 | 116185 | 117061 | 115829 | 121736 | 121507 | 15771  |         |        |        |         |         |         |          |          |         |         |         |         |         |        |          |          |         |         |        |       |        |
| C15 H25 O4 P3       | 43181   | 43828   | 44427   | 39848   | 10831  |        |        | 15953  | 8820   | 8991   | 9142   | 47859   | 23794  |        |         |         |         |          |          |         |         |         |         |         |        |          |          |         |         |        |       |        |
| C15 H26 N3 O4 P S3  |         |         |         |         | 1693   | 73884  | 74286  | 70773  | 66772  | 68615  | 65283  |         |        |        |         |         |         |          |          |         |         |         |         |         |        |          |          |         |         |        |       |        |
| C15 H28 N4 S2       | 133832  | 132897  | 129431  | 136929  |        |        |        |        |        |        |        |         |        |        |         |         |         |          |          |         |         |         |         |         |        |          |          |         |         |        |       |        |
| C15 H30 O2          | 63609   | 104681  | 67437   | 68900   | 77208  | 74766  | 44241  | 81682  | 86153  | 76705  | 87052  | 133822  | 24659  | 54093  | 65323   | 59448   | 75723   | 90525    | 116185   | 84670   | 113877  | 38400   | 103956  | 76192   | 33053  | 130262   | 61509    | 79634   |         |        |       |        |
| C15 H31 N4 O3 P     | 26931   | 32029   | 24618   | 24593   | 22732  | 212599 | 227445 | 244378 | 231061 | 26758  | 45530  | 23604   | 28017  | 165361 | 23012   | 53120   | 121054  | 56444    | 39884    | 51565   | 149489  | 35447   | 32355   | 127552  | 43747  | 22810    | 67986    |         |         |        |       |        |
| C15 H31 N4 O S2     | 53570   | 55990   | 50897   | 47766   | 3169   | 2878   | 3982   | 3676   | 7780   | 3722   | 9716   | 47147   | 44694  | 40972  | 17225   | 13410   | 43220   | 43191    | 65451    | 38051   | 45418   | 10015   | 59417   | 46900   | 15103  | 178466   | 140756   | 158731  |         |        |       |        |
| C15 H33 C1 N4 O2    | 26500   | 24357   | 17181   | 5333    | 23563  | 22623  | 24316  | 22861  | 25069  | 22826  | 19116  | 62359   | 4711   |        |         |         |         |          |          |         |         |         |         |         |        |          |          |         | 40063   |        |       |        |
| C15 H33 N4 O3 P     | 354095  | 359596  | 371935  | 365232  | 869705 | 808132 | 852360 | 864456 | 936754 | 889983 | 318818 | 421278  | 21876  | 152639 | 242225  | 125182  | 296779  | 604578   | 437512   | 524187  | 454159  | 46356   | 438726  | 382787  | 8459   | 452246   | 502594   | 525844  |         |        |       |        |
| C15 H35 N4 O3 P     | 550991  | 554183  | 580574  | 573343  | 777663 | 749216 | 793714 | 806651 | 883663 | 830426 | 534168 | 651754  | 86352  | 475795 | 382483  | 333413  | 556004  | 704157   | 635391   | 718656  | 676947  | 113630  | 661430  | 611297  | 13701  | 682000   | 566802   | 698     |         |        |       |        |

|                        |         |         |         |         |         |         |         |         |         |         |         |         |         |         |         |         |         |         |         |         |         |        |         |         |        |         |         |         |       |
|------------------------|---------|---------|---------|---------|---------|---------|---------|---------|---------|---------|---------|---------|---------|---------|---------|---------|---------|---------|---------|---------|---------|--------|---------|---------|--------|---------|---------|---------|-------|
| C18 H36 O2             | 1255364 | 1359781 | 1408617 | 1379580 | 1618546 | 1514902 | 1593440 | 1682963 | 1860051 | 1720386 | 1573158 | 1676190 | 1015760 | 1342603 | 1136381 | 1393385 | 1272971 | 1238228 | 1294581 | 1677665 | 1692644 | 777089 | 1644744 | 1338997 | 521587 | 1465930 | 1980648 | 1332630 |       |
| C18 H36 O3             | 114994  | 105688  | 115643  | 106082  | 148709  | 135300  | 140236  | 137571  | 135004  | 135746  | 63466   | 126616  | 94856   | 69688   | 99420   | 102341  | 103221  | 103221  | 103221  | 103221  | 103221  | 62054  | 199586  | 158772  | 66216  | 238337  | 125052  | 137188  |       |
| C18 H36 O4             | 56816   | 52717   | 52408   | 49551   | 43992   | 41128   | 41584   | 40833   | 42711   | 40364   | 18852   | 45751   | 8906    | 14460   | 16371   | 13813   | 72489   | 117106  | 160244  | 76975   | 99623   | 12848  | 117308  | 91409   | 5664   | 157526  | 29450   | 128334  |       |
| C18 H37 N10 O3 P5 S    |         |         |         |         | 2442138 | 2408374 | 2325744 | 2038710 | 2058086 | 2063245 |         |         |         |         |         |         |         |         |         |         |         |        |         |         |        |         |         |         |       |
| C18 H37 N2 O14 P3 S    | 48305   | 43337   | 43334   | 41508   | 46708   | 47788   | 44161   | 46987   | 49229   | 46229   | 36911   | 43047   | 34112   | 38791   | 37436   | 30675   | 51203   | 53008   | 59925   | 45354   | 52446   | 33538  | 55520   | 49178   | 30020  | 69051   | 43386   | 59481   |       |
| C18 H39 Cl N2 O S3     | 57506   | 54567   | 58633   | 56878   | 26429   | 73164   | 75454   | 47882   | 81321   | 47260   | 71486   | 50477   | 23375   | 48546   | 51646   | 40763   | 58046   | 73304   | 78053   | 70967   | 75282   | 20886  | 87579   | 63586   | 70245  | 58634   | 81271   |         |       |
| C18 H41 O P3           | 47905   | 43599   | 48274   | 41768   | 17386   | 20023   | 24615   | 26361   | 24956   | 17934   | 19433   | 66515   | 12405   | 20756   | 22936   | 12911   | 54423   | 69488   | 107956  | 55348   | 68795   | 16578  | 81673   | 73987   | 41289  | 26933   | 70289   |         |       |
| C19 H14 N10 O2         | 428089  | 417297  | 407657  | 406243  | 233702  | 232806  | 240268  | 230177  | 226827  | 222556  | 388361  | 407635  | 312384  | 434905  | 393358  | 334927  | 321781  | 389693  | 512570  | 337601  | 419802  | 385930 | 503851  | 457744  | 600464 | 568949  | 500473  | 457605  |       |
| C19 H16 N10 O8 S       | 92224   | 89037   | 89959   | 85903   | 50730   | 47028   | 48259   | 48676   | 45341   | 86508   | 92918   | 74370   | 99710   | 85379   | 75878   | 77320   | 86908   | 104887  | 78969   | 88428   | 89743   | 107927 | 98180   | 136429  | 120880 | 109318  | 94866   |         |       |
| C19 H18 N6 O           | 1022    |         |         |         | 33780   | 35750   | 39120   | 37329   | 39103   | 42924   |         |         |         |         |         |         |         |         |         |         |         |        |         |         |        |         |         |         |       |
| C19 H18 N8 O12         | 93184   | 90396   | 90103   | 85587   | 50335   | 51215   | 49215   | 49904   | 50209   | 47080   | 87492   | 92978   | 78771   | 100670  | 85491   | 77754   | 73515   | 84099   | 100290  | 73150   | 84275   | 89768  | 103925  | 95987   | 137953 | 118938  | 108101  | 88732   |       |
| C19 H21 Cl N2 O10      | 36628   | 35425   | 35144   | 32766   | 19518   | 19606   | 19429   | 17897   | 18891   | 18447   | 33932   | 34385   | 27355   | 37087   | 32035   | 29290   | 28523   | 34627   | 39148   | 26329   | 35098   | 33059  | 503851  | 457744  | 600464 | 568949  | 500473  | 457605  |       |
| C19 H22 N14 O3 S2      | 71151   | 56825   | 61207   | 69643   |         |         |         |         |         |         | 54205   | 18778   | 3204    | 59511   | 23678   | 7193    | 205435  | 262268  | 276084  | 145622  | 144850  | 19957  | 137590  | 76592   |        | 128437  | 60977   | 167535  |       |
| C19 H22 N2 O2 P2       |         |         |         |         | 26708   | 25767   | 25783   | 25745   | 25553   | 26452   |         |         |         |         |         |         |         |         |         |         |         |        |         |         |        |         |         |         |       |
| C19 H23 N2 O2 P        | 62310   | 62199   | 64825   | 64317   | 43071   | 42645   | 45548   | 43947   | 43870   | 41115   | 61918   | 90089   | 31530   | 40569   | 46632   | 43669   | 59951   | 83150   | 110478  | 70181   | 93242   | 31237  | 97295   | 81257   | 19109  | 109008  | 69732   | 72862   |       |
| C19 H23 N8 O2 P5       | 86714   | 80881   | 83287   | 78440   | 50491   | 49951   | 49310   | 49262   | 53212   | 51443   | 80995   | 84912   | 74151   | 91430   | 77723   | 74374   | 68486   | 80057   | 89990   | 71481   | 80172   | 86449  | 91549   | 82524   | 111677 | 99918   | 100526  | 80792   |       |
| C19 H25 N10 O4 P5      | 46105   | 42993   | 43278   | 42840   | 25975   | 23051   | 24975   | 22621   | 23078   | 22290   | 38658   | 46711   | 37540   | 48073   | 41656   | 35797   | 35734   | 40566   | 47133   | 34769   | 40667   | 42595  | 49214   | 45925   | 65658  | 56866   | 49100   | 44164   |       |
| C19 H26 N3 P S2        | 143682  | 137571  | 133251  | 130507  |         |         |         |         |         |         | 1002    |         |         |         |         |         |         |         |         |         |         |        |         |         |        |         |         |         |       |
| C19 H30 N4             |         |         |         |         | 16678   |         |         |         |         |         |         |         |         |         |         |         |         |         |         |         |         |        |         |         |        |         |         |         |       |
| C19 H30 N6 O2          | 102579  | 36408   | 114067  | 36131   | 130988  | 125069  | 101592  | 129155  | 106076  | 121965  | 102146  | 46480   | 69630   | 107362  | 89265   | 32347   | 91270   | 61803   | 133633  | 142583  | 156576  | 19545  | 73779   | 107803  | 32358  | 135306  | 37320   | 166007  |       |
| C19 H32 N2 O7 S        | 42183   | 41439   | 38474   | 36122   | 179045  | 172309  | 173968  | 166366  | 164749  | 156613  | 45704   | 32192   | 23096   | 32362   | 108138  | 49940   | 37939   | 48973   | 73369   | 56097   | 40904   | 30240  | 30186   | 42160   | 35829  | 30285   | 31280   | 46287   |       |
| C19 H32 N2 O8          | 146171  | 139355  | 147471  | 144086  | 317556  | 306886  | 324544  | 321986  | 335688  | 307495  | 127348  | 175279  |         |         |         |         |         |         |         |         |         |        |         |         |        |         |         |         |       |
| C19 H32 N3 O2 P        | 29566   | 33861   | 32952   | 29292   | 26737   | 22509   | 25763   | 25500   |         |         | 24311   | 48960   | 31741   | 28546   | 35427   | 57111   | 35817   | 22023   | 25182   | 19160   | 22603   | 24275  | 43577   | 30193   | 30225  | 38350   | 26753   | 36504   | 29618 |
| C19 H32 N6 O2          | 7330    | 7843    | 9207    | 6628    | 17596   | 18127   | 17596   | 18127   | 18693   | 18873   | 7358    | 16397   | 1262    | 4290    | 7464    |         |         |         |         |         |         |        |         |         |        |         |         |         |       |
| C19 H34 N2 O3 P        | 112888  | 106300  | 97379   | 105560  | 215262  | 213118  | 220416  | 216932  | 217965  | 200321  | 111680  |         |         |         |         |         |         |         |         |         |         |        |         |         |        |         |         |         |       |
| C19 H34 N2 O8          | 208471  | 206241  | 206135  | 200855  | 357575  | 347152  | 366075  | 357194  | 369801  | 359816  | 185432  | 266054  |         |         |         |         |         |         |         |         |         |        |         |         |        |         |         |         |       |
| C19 H34 N8 O7 P2 S3    |         |         |         |         | 661699  | 657001  | 645986  | 545138  | 573090  | 570398  |         |         |         |         |         |         |         |         |         |         |         |        |         |         |        |         |         |         |       |
| C19 H36 O2             | 12331   | 17411   | 19193   | 18659   | 46293   | 45117   | 48430   | 48066   | 51484   | 48823   | 21134   | 60882   | 8673    | 18893   | 22753   | 6620    | 16767   | 17420   | 23312   | 23733   | 16683   | 8877   | 24655   | 18601   | 3952   | 23731   | 13236   | 23557   |       |
| C19 H37 O2 P3          | 27041   | 31107   | 27661   | 25282   | 103105  | 102235  | 103560  | 102987  | 113997  | 101770  | 37592   | 82459   | 14529   | 18884   | 42057   | 19455   | 18576   | 51594   | 59660   | 48409   | 47687   | 6901   | 37798   | 30300   | 4953   | 52240   | 25269   | 160749  |       |
| C19 H38 N2 O12 P2      | 53972   | 59086   | 58000   | 54301   | 82306   | 80773   | 84514   | 83853   | 84502   | 77037   | 53012   | 74513   | 10529   | 14334   | 44079   | 32773   | 56861   | 74935   | 67907   | 73045   | 77877   | 20886  | 76584   | 67785   | 5204   | 75021   | 25634   | 81776   |       |
| C19 H38 O2             | 57419   | 60432   | 60210   | 61120   | 5662    | 5103    | 6600    | 6198    |         |         | 8371    | 53056   | 64930   | 42908   | 71581   | 18466   | 52287   | 62515   | 51733   | 88152   | 46429   | 47275  | 35074   | 59271   | 40469  | 31480   | 53216   | 85104   | 46270 |
| C19 H38 S2             | 120659  | 128292  | 126634  | 111184  | 26401   | 29183   | 27213   | 4674    | 27309   | 25160   | 143887  | 248899  | 26877   | 71815   | 90450   | 59494   | 69466   | 221932  | 132708  | 532710  | 128583  | 25764  | 159851  | 128055  | 5345   | 137609  | 83528   | 89820   |       |
| C19 H39 Cl S4          | 64373   | 66787   | 70184   | 67440   | 274119  | 267922  | 273379  | 257442  | 269172  | 259898  | 31735   | 22834   |         |         |         |         |         |         |         |         |         |        |         |         |        |         |         |         |       |
| C19 H39 N2 O4 N3 O3 P2 | 52338   | 46887   | 45747   | 47705   |         |         |         |         |         |         | 11091   | 14900   | 3897    | 30412   | 18127   |         |         |         |         |         |         |        |         |         |        |         |         |         |       |
| C20 H15 O2 P           | 35318   | 32424   | 31521   | 30503   |         |         |         |         |         |         | 1521    |         |         |         |         |         |         |         |         |         |         |        |         |         |        |         |         |         |       |
| C20 H18 N4 O2          | 1272492 | 1220266 | 1187805 | 1179928 | 659120  | 651897  | 656909  | 641138  | 643502  | 622260  | 1088183 | 1159566 | 878838  | 1245539 | 1151114 | 947347  | 388775  | 83972   | 105850  | 31183   | 23150   | 18030  | 54289   | 56330   |        |         |         |         |       |
| C20 H20 N10 O2         | 19867   |         |         |         | 55212   | 47618   | 52638   | 48765   | 55155   | 52395   |         |         |         |         |         |         |         |         |         |         |         |        |         |         |        |         |         |         |       |
| C20 H20 N4 O2          | 67174   | 62569   | 63518   | 61360   | 36056   | 34613   | 37437   | 34288   | 34786   | 34900   | 56291   | 62531   | 47924   | 66319   | 58346   | 51915   | 47928   | 60811   | 79341   | 50466   | 64258   | 58618  | 80415   | 69074   | 98147  | 96455   | 78270   | 70083   |       |
| C20 H22 N10            |         |         |         |         | 29795   | 34137   | 35972   | 49727   | 48379   | 51152   |         |         |         |         |         |         |         |         |         |         |         |        |         |         |        |         |         |         |       |
| C20 H22 N2 O12         | 290479  | 284086  | 281456  | 274505  | 157137  | 150166  | 151974  | 154330  | 148608  | 268227  | 286851  | 236061  | 310769  | 271934  | 243233  | 228264  | 268588  | 324332  | 228955  | 267028  | 280125  | 333656 | 296881  | 424333  | 370630 | 343374  | 289034  |         |       |
| C20 H24 N18 O P4       | 20149   | 21243   | 21795   | 20673   | 40059   | 43728   | 41636   | 42746   | 42461   | 40525   | 26214   | 35704   | 5880    | 18015   | 25227   | 7275    | 19651   | 40475   | 43640   | 27766   | 29130   | 10563  | 25072   | 22604   | 4558   | 38078   | 17072   | 42988   |       |
| C20 H24 N4 O4          | 19251   | 17427   | 16723   | 16326   | 37931   | 34942   | 33135   | 43386   | 43227   | 35868   | 82145   | 47286   | 2691    | 13927   | 18536   | 8678    | 15291   | 33346   | 46740   | 24060   | 41220   | 5665   | 23025   | 20071   | 61420  | 32317   | 14721   | 48984   |       |
| C20 H25 N2 O2 P        | 261365  | 279298  | 286009  | 245052  | 262916  | 244528  | 258488  | 298668  | 278278  | 258667  | 264288  | 265797  | 284060  | 271547  | 245198  | 281386  | 274836  | 280953  | 279888  | 220856  | 311530  | 285293 | 282435  | 294027  | 242733 | 318785  | 323937  | 285877  |       |
| C20 H25 N6 P5          |         |         |         |         | 6850    | 5253    | 62259   | 55386   | 53999   | 49977   | 53491   | 56075   | 12694   | 8080    |         |         |         |         |         |         |         |        |         |         |        |         |         |         |       |
| C20 H26 N6 O4          | 22540   | 143971  | 150399  | 23921   | 59703   | 58885   | 58807   | 55696   | 55248   | 52148   |         |         |         |         |         |         |         |         |         |         |         |        |         |         |        |         |         |         |       |
| C20 H27 N12 O7 P3 S    |         |         |         |         | 121117  | 131394  | 124233  | 96662   | 99379   | 101135  |         |         |         |         |         |         |         |         |         |         |         |        |         |         |        |         |         |         |       |
| C20 H28 O P2           |         |         |         |         | 55617   | 42135   | 63362   | 38459   | 53147   | 53970   |         |         |         |         |         |         |         |         |         |         |         |        |         |         |        |         |         |         |       |
| C20 H28 O4             |         |         |         |         | 34022   | 32458   | 34946   | 32188   | 36395   | 33337   |         |         |         |         |         |         |         |         |         |         |         |        |         |         |        |         |         |         |       |
| C20 H29 N14 O P5       | 30939   | 32607   | 30472   | 31699   | 40795   | 40182   | 41174   | 40546   | 40910   | 39225   | 20959   | 24087   | 15412   | 24521   | 21890   | 21384   | 33839   |         |         |         |         |        |         |         |        |         |         |         |       |

|                    |        |        |        |        |        |        |        |        |        |        |        |        |        |        |        |        |        |        |         |        |         |        |        |        |        |        |        |        |  |  |
|--------------------|--------|--------|--------|--------|--------|--------|--------|--------|--------|--------|--------|--------|--------|--------|--------|--------|--------|--------|---------|--------|---------|--------|--------|--------|--------|--------|--------|--------|--|--|
| C23 H35 O17 P      | 62604  | 76808  | 89115  | 87191  | 125530 | 121007 | 104019 | 127848 | 119105 | 68671  | 135266 | 6667   | 74635  | 86486  | 46503  | 78745  | 124214 | 154659 | 143996  | 39406  | 130473  | 78533  | 7520   | 142365 | 94287  | 80051  |        |        |  |  |
| C23 H36 O P4       | 15265  | 14636  | 17530  | 14698  | 30922  | 32003  | 31065  | 30482  | 38386  | 16925  | 30288  | 2658   | 13062  | 15978  | 7700   | 13637  | 26491  | 26762  | 22325   | 22267  | 3725    | 18670  | 17579  | 22918  | 11651  | 34893  |        |        |  |  |
| C23 H36 O2 S2      | 16824  | 15345  | 15096  | 14631  | 784010 | 767711 | 797249 | 736248 | 747740 | 738258 | 14766  | 6792   | 1909   |        |        | 8586   | 42723  | 37974  | 56797   | 24119  | 44805   | 9270   | 27039  | 16088  | 17024  | 3583   | 57935  |        |  |  |
| C23 H37 O17 P      | 115404 | 123309 | 124524 | 118243 | 152123 | 144057 | 146653 | 145444 | 147775 | 137956 | 112663 | 150917 | 37657  | 99184  | 100357 | 74310  | 131412 | 151855 | 136708  | 142948 | 149161  | 46326  | 149928 | 140924 | 12359  | 148439 | 128101 | 153864 |  |  |
| C23 H37 O2 P3      | 3501   | 2183   | 3351   | 4333   | 42573  | 40300  | 44373  | 39738  | 42284  | 41113  | 61460  | 3161   | 5338   | 29008  | 2720   | 23188  | 54993  | 4796   | 7876    | 5362   | 11041   | 11522  | 126657 | 13663  | 96719  | 83681  | 8958   |        |  |  |
| C23 H39 N8 O7 P5 S | 99005  | 100474 | 101344 | 96762  | 45961  | 63775  | 41211  | 20291  | 38759  | 35956  | 94396  | 81128  | 105979 | 106320 | 90006  | 102217 | 103940 | 99849  | 102763  | 61154  | 60574   | 102990 | 84761  | 95804  | 96091  | 91711  | 85683  | 89409  |  |  |
| C23 H39 O17 P      | 112379 | 112073 | 112668 | 106826 | 104097 | 93282  | 99298  | 103833 | 105174 | 101305 | 124408 | 126799 | 92114  | 111338 | 100871 | 107584 | 110923 | 104954 | 98770   | 120885 | 132552  | 80946  | 134693 | 110282 | 69510  | 118652 | 146524 | 115707 |  |  |
| C23 H40 N6 O2 P6   | 118583 | 118360 | 115227 | 24937  | 19717  | 16662  | 22599  | 20236  | 111089 | 69673  | 106907 | 114565 | 103218 | 114371 | 101894 | 111181 | 28410  | 124116 | 115673  | 114090 | 36185   | 17976  | 25880  | 123805 | 7666   | 44824  | 118018 | 121630 |  |  |
| C23 H42 S4         | 70995  | 93527  | 102012 | 99714  | 76317  | 70241  | 59092  | 76719  | 90404  | 75843  | 99355  | 94382  | 116897 | 112111 | 79786  | 100608 | 91381  | 108269 | 98905   | 82329  | 87070   | 340902 | 86927  | 94979  | 143337 | 109704 | 91373  | 79397  |  |  |
| C23 H43 N O4 P2 S  | 147636 | 144467 | 142354 | 135350 |        |        |        |        |        |        |        |        |        |        |        |        |        |        |         |        |         |        |        |        |        |        |        |        |  |  |
| C23 H43 N13 P2     |        | 2939   |        |        | 58857  | 48468  | 53292  | 50171  | 43943  | 43716  |        |        |        |        |        |        |        |        |         |        |         |        |        |        |        |        |        |        |  |  |
| C23 H44 N6 O4 P4 S | 70446  | 68953  | 67746  | 68166  | 66331  | 60279  | 64971  | 63183  | 63749  | 64512  | 77238  | 79867  | 54277  | 62846  | 60473  | 68279  | 65037  | 62297  | 59446   | 73762  | 79217   | 47282  | 80357  | 67427  | 37583  | 68428  | 101019 | 71682  |  |  |
| C23 H45 N7 P2      |        | 9544   | 5720   |        | 121942 | 118112 | 121220 | 120728 | 118053 | 112705 | 10630  |        |        |        |        |        |        |        |         |        |         |        |        |        |        |        |        |        |  |  |
| C23 H47 C1 N3 O3 P | 26029  | 24468  | 24950  | 25105  | 139299 | 130123 | 132670 | 138993 | 128706 | 133148 | 32324  | 17864  | 20305  | 22355  | 19286  | 19989  | 37475  | 51801  | 43690   | 74455  | 96816   | 11558  | 39881  | 27376  | 4838   | 34309  | 19816  | 88072  |  |  |
| C23 H48 N O9 P     | 6601   | 7656   | 6025   | 6304   | 119867 | 115783 | 116098 | 103496 | 103494 | 94056  | 9059   | 12554  | 1834   | 4951   | 7457   | 3094   | 4627   | 7269   | 7941    | 9245   | 13957   | 1653   | 12104  | 4409   | 5003   | 2859   | 12088  |        |  |  |
| C23 H48 N5 P3      |        |        |        |        | 30898  | 27058  | 34834  | 34655  | 35149  | 36380  |        |        |        |        |        |        |        |        |         |        |         |        |        |        |        |        |        |        |  |  |
| C23 H9 C1 N6 O     | 154497 | 156036 | 155264 | 154206 | 92699  | 102428 | 102905 | 107983 | 103378 | 103077 | 145255 | 149566 |        |        |        |        |        |        |         |        |         |        |        |        |        |        |        |        |  |  |
| C24 H17 N8 O2 P    | 28720  | 29388  | 27944  | 25566  | 16688  | 15680  | 17831  | 16193  | 16617  | 15239  | 25913  | 27137  | 20149  | 27891  | 28269  | 24147  | 22868  | 26601  | 40381   | 25457  | 30351   | 23943  | 35491  | 34508  | 36012  | 39599  | 33277  | 37680  |  |  |
| C24 H19 N3 O9 P2   | 329908 | 344098 | 338542 | 328067 |        |        |        |        |        |        | 290887 | 4605   | 43459  | 74514  | 54762  | 50808  | 663947 | 675810 | 857268  | 544843 | 719929  | 220295 | 235016 | 480683 | 7064   | 587774 | 12067  | 658747 |  |  |
| C24 H21 N12 O P    |        |        |        |        | 42526  | 40515  | 38984  | 36750  | 34736  | 38093  |        |        |        |        |        |        |        |        |         |        |         |        |        |        |        |        |        |        |  |  |
| C24 H24 N4 O4      | 702837 | 709620 | 711722 | 691189 | 45467  | 40734  | 42246  | 40960  | 43134  | 41710  | 530687 | 554476 | 649630 | 643907 | 557690 | 537782 | 642255 | 738422 | 939504  | 747124 | 683293  | 615913 | 766326 | 668777 | 709130 | 708752 | 760351 | 725058 |  |  |
| C24 H27 N23 O      |        |        |        |        | 37680  | 39028  | 38724  | 40493  | 41845  | 38252  |        |        |        |        |        |        |        |        |         |        |         |        |        |        |        |        |        |        |  |  |
| C24 H28 N12 O12 S  | 73760  | 70768  | 71288  | 65033  | 25119  | 24610  | 25203  | 24531  | 26252  | 24291  | 61664  | 71602  | 47175  | 78743  | 63224  | 55965  | 46143  | 60085  | 81806   | 44234  | 59310   | 75659  | 93414  | 75388  | 128456 | 110396 | 98217  | 73762  |  |  |
| C24 H32 N10        |        | 6324   | 3681   | 3054   | 32828  | 29426  | 33537  | 33057  | 34238  | 32072  |        |        |        |        |        |        |        |        |         |        |         |        |        |        |        |        |        |        |  |  |
| C24 H32 N2 O5      | 12355  | 10546  | 14954  | 8580   |        |        | 69165  | 45181  |        |        | 11366  | 6321   | 9147   | 17472  | 2964   | 14818  | 6896   | 14594  | 23845   | 11067  | 17572   | 9055   | 15660  | 8461   | 10617  | 15667  | 11772  | 11921  |  |  |
| C24 H32 O P2       |        |        |        |        | 30504  | 29643  | 30130  | 27362  | 27031  | 28261  |        |        |        |        |        |        |        |        |         |        |         |        |        |        |        |        |        |        |  |  |
| C24 H32 P4         | 6571   | 7032   | 6640   | 6466   | 27706  | 28343  | 28271  | 30211  | 30959  | 28782  | 4478   | 5671   |        |        |        |        |        |        |         |        |         |        |        |        |        |        |        |        |  |  |
| C24 H33 N3 O2      | 287188 | 281812 | 282783 | 265252 |        |        |        |        |        |        | 187829 | 5788   | 36910  | 60098  | 66157  | 71019  | 699124 | 680273 | 1150933 | 897706 | 1164202 | 238759 | 317645 | 377421 | 15397  | 479040 | 27004  | 811885 |  |  |
| C24 H34 N2 O10     | 123212 | 123703 | 122859 | 117059 | 38853  | 38504  | 39011  | 37987  | 40218  | 37883  | 107037 | 113331 | 78206  | 140826 | 104841 | 88200  | 74032  | 112820 | 181467  | 77863  | 121822  | 122612 | 178664 | 138300 | 245551 | 230013 | 186305 | 138803 |  |  |
| C24 H35 N10 O7 P5  | 22510  | 23180  | 20918  | 22078  | 39526  | 35852  | 37499  | 37606  | 39047  | 37980  | 24608  | 39807  | 6947   | 18118  | 27738  | 11320  | 19234  | 35686  | 48329   | 30371  | 31595   | 10753  | 29462  | 25568  | 8816   | 30989  | 20856  | 46727  |  |  |
| C24 H35 N6 O2 P3   | 25378  | 25584  | 28358  | 29561  | 43128  | 37570  | 40694  | 39408  | 36715  | 39570  | 39901  | 29494  | 2676   | 12907  | 28799  | 3481   | 22238  | 52467  | 34753   | 33480  | 46712   | 8200   | 37711  | 40184  | 31948  | 22582  | 14849  | 10519  |  |  |
| C24 H36 N12 O5     | 2602   | 2608   |        |        | 1773   | 433509 | 430813 | 431114 | 403688 | 413611 | 409674 |        |        |        |        |        |        |        |         |        |         |        |        |        |        |        |        |        |  |  |
| C24 H36 N2 O3 S2   | 41824  | 41535  | 40649  | 41110  | 80000  | 71316  | 78501  | 72935  | 77693  | 70634  | 48595  |        |        |        |        |        |        |        |         |        |         |        |        |        |        |        |        |        |  |  |
| C24 H36 O10 P6     | 18548  | 20652  | 19356  | 17404  | 18780  | 19347  | 20578  | 22094  | 21849  | 22006  | 8748   | 15876  | 8059   | 13964  | 13276  | 9618   | 26603  | 27328  | 32518   | 26555  | 26377   | 8623   | 30382  | 29004  | 7403   | 30197  | 15029  | 21639  |  |  |
| C24 H37 N2 O10 P S | 105653 | 105085 | 100289 | 103385 | 118798 | 107873 | 115032 | 110820 | 115113 | 107623 | 102109 | 114080 | 14698  | 54802  | 92132  | 57330  | 92157  | 163238 | 137585  | 142757 | 176974  | 32841  | 155752 | 114485 | 119375 | 109411 | 157435 |        |  |  |
| C24 H37 O4 P3      | 20459  | 19793  |        |        | 34683  | 30945  | 24218  | 30503  | 29659  | 28931  |        |        |        |        |        |        |        |        |         |        |         |        |        |        |        |        |        |        |  |  |
| C24 H38 N2 O17 P2  | 62524  | 60997  | 61855  | 58569  | 74878  | 47165  | 71836  | 70713  | 77564  | 69348  | 53310  | 74202  | 9527   | 36716  | 43857  | 28524  | 50247  | 84353  | 72663   | 84965  | 76304   | 18563  | 76997  | 67536  |        | 75226  | 66281  | 80378  |  |  |
| C24 H38 O13 P2     | 129672 | 129282 | 134889 | 129135 | 137366 | 126846 | 134780 | 136680 | 122927 | 131013 | 110443 | 101043 | 128823 | 109309 | 117351 | 133940 | 144950 | 129281 | 140493  | 145329 | 152330  | 139541 | 81047  | 144583 | 141616 | 142563 |        |        |  |  |
| C24 H38 O19 P2 S   | 39540  | 41887  | 30980  | 42823  | 53885  | 52957  | 52462  | 56297  | 58126  | 55342  | 33248  | 48215  | 6037   | 27101  | 46684  | 15820  | 26664  | 49366  | 59760   | 48889  | 51419   | 9936   | 50376  | 46511  | 51559  | 24449  | 69628  |        |  |  |
| C24 H40 N12 O2 P6  | 35230  | 33542  | 33398  | 30475  | 11707  | 10759  | 11741  | 12637  | 11135  | 12667  | 33198  | 24182  | 39739  | 29528  | 27342  | 21436  | 31042  | 40723  | 22430   | 29478  | 35327   | 46871  | 34427  | 63176  | 55097  | 47545  | 35626  |        |  |  |
| C24 H40 N2 O17 P2  | 4407   | 7252   | 91623  |        | 94138  | 128934 | 139081 | 140869 | 62751  | 5709   | 4727   | 9724   |        |        |        |        |        |        |         |        |         |        |        |        |        |        |        |        |  |  |
| C24 H40 O4         | 8730   |        | 11318  |        | 10702  | 91250  | 96447  | 90306  | 93915  | 89566  |        |        |        |        |        |        |        |        |         |        |         |        |        |        |        |        |        |        |  |  |
| C24 H42 N2 O17 P2  | 66597  | 66231  | 64613  | 64490  | 61980  | 59916  | 64519  | 63618  | 63059  | 62224  | 72772  | 76319  | 52641  | 63122  | 60661  | 68336  | 60244  | 63070  | 58344   | 78542  | 80476   | 45536  | 84141  | 63963  | 40189  | 68155  | 97138  | 64708  |  |  |
| C24 H42 N6 O3      |        | 2005   |        |        | 4708   | 9280   | 106576 | 124339 | 84854  | 75190  | 83142  |        |        |        |        |        |        |        |         |        |         |        |        |        |        |        |        |        |  |  |
| C24 H43 C1 O21     | 96278  | 95943  | 96345  | 99318  | 2413   | 5522   | 4904   |        |        |        | 31442  | 48732  | 23764  | 157185 | 60406  | 116904 | 40824  | 108153 | 152612  | 71278  | 69232   | 99811  | 105018 | 146743 | 163317 | 208881 | 92703  | 63136  |  |  |
| C24 H43 N19 P2     | 1430   | 1895   | 1804   | 1268   | 24529  | 26145  | 23964  | 23380  | 23261  | 20834  | 1495   | 3392   |        |        |        |        |        |        |         |        |         |        |        |        |        |        |        |        |  |  |
| C24 H43 N9 O S3    | 31829  | 30290  | 27075  | 26626  | 16131  | 16081  | 17318  | 16619  | 17559  | 15285  | 33671  | 17444  | 7153   | 31464  | 25445  | 16184  | 58665  | 55813  | 60739   | 79866  | 133702  | 10626  | 41592  | 20718  | 8034   | 41183  | 18210  | 133190 |  |  |
| C24 H44 N6 P4      |        |        |        |        | 42914  | 42377  | 45615  | 38888  | 47684  | 44165  |        |        |        |        |        |        |        |        |         |        |         |        |        |        |        |        |        |        |  |  |
| C24 H44 O2 P6      | 102626 | 101717 | 102167 | 30009  |        |        |        |        |        |        |        |        |        |        |        |        |        |        |         |        |         |        |        |        |        |        |        |        |  |  |





|                       |        |        |        |        |        |        |        |        |        |        |        |        |       |        |       |       |        |        |        |        |        |        |        |        |       |        |        |        |       |       |
|-----------------------|--------|--------|--------|--------|--------|--------|--------|--------|--------|--------|--------|--------|-------|--------|-------|-------|--------|--------|--------|--------|--------|--------|--------|--------|-------|--------|--------|--------|-------|-------|
| C33 H36 N20 O2        | 10778  | 10462  | 10570  | 19047  | 2791   | 13267  | 28301  | 15246  | 14124  | 24460  | 6475   | 10367  | 8765  | 7484   | 5494  | 4570  | 13656  | 17673  | 16329  | 14337  | 15672  | 4599   | 21333  | 15056  | 3337  | 29708  | 10914  | 24209  |       |       |
| C33 H37 N5            |        |        | 6505   |        | 34889  |        | 27006  | 29619  | 31923  | 23604  | 9480   | 6637   |       |        |       |       |        | 2741   | 9262   | 13056  | 10057  |        |        |        |       |        |        |        |       |       |
| C33 H37 N6 O2 P       | 41872  | 43086  | 42007  | 39484  | 28637  | 26498  | 29799  | 26308  | 27168  | 23979  | 42470  | 44447  | 41762 | 50803  | 43548 | 44234 | 41252  | 44271  | 46406  | 39184  | 40125  | 48615  | 48065  | 46297  | 65367 | 59695  | 49450  | 43910  |       |       |
| C33 H41 N11           | 4237   | 4626   |        |        | 24155  | 22681  | 85403  | 22239  | 21972  | 76622  |        | 7331   |       |        |       |       |        | 5590   | 18114  | 17075  | 9793   |        |        |        |       | 7548   | 3400   | 5865   |       |       |
| C33 H43 N11 P2        |        |        |        |        | 1282   | 25217  | 22232  | 28365  | 20442  | 23540  | 23181  |        | 1488  |        |       |       |        |        |        |        | 4900   |        |        |        |       |        |        |        |       |       |
| C33 H45 N P2          |        |        |        |        | 1157   |        | 32417  | 31665  | 33173  | 33640  | 33710  | 29245  |       |        |       |       |        |        | 5440   | 6849   | 2566   |        | 3759   | 1039   |       |        |        |        |       |       |
| C33 H46 Cl N O4       |        |        |        |        | 5638   | 5711   | 3980   | 5162   | 44459  | 38358  | 41737  | 39486  | 37367 | 38288  | 5577  | 6769  |        | 6101   | 7724   | 7167   | 10898  | 10478  |        |        |       |        | 7864   | 3058   | 6503  |       |
| C33 H48 O P4          |        |        |        |        |        |        |        | 25255  | 22720  | 28486  | 20221  | 22751  | 20651 |        |       |       |        |        |        |        | 1133   |        |        |        |       |        |        |        |       |       |
| C33 H50 N4 O          |        |        |        |        |        | 2254   |        | 71506  | 79376  | 74231  | 78470  | 72454  | 59825 |        |       |       |        |        |        | 4017   | 7298   | 4782   | 8762   |        | 4105  |        | 1522   |        | 1408  |       |
| C33 H51 N O2 P2       | 8457   | 9057   | 8010   | 7172   |        |        | 21774  | 14178  |        |        | 3991   | 7703   | 2973  | 4073   | 6075  | 2276  | 8485   |        | 19502  | 20768  | 17361  | 2224   | 14810  | 13999  | 1273  | 15513  | 12662  | 14225  |       |       |
| C33 H52 N4 O          | 2168   |        | 2099   | 3048   | 7691   | 278167 | 79184  | 4925   | 45212  | 46259  | 2704   | 1635   |       |        |       |       |        |        |        |        |        |        |        |        |       |        |        |        |       |       |
| C33 H54 N4 O2         | 7200   | 10772  | 8485   | 4129   | 446392 | 421759 | 437340 | 48327  | 424537 | 411202 |        |        | 1595  |        |       |       |        | 3983   | 10144  | 11655  | 24431  | 39209  |        | 18411  | 1902  | 6950   | 6438   |        |       |       |
| C33 H59 Cl N2 O6      | 57447  | 56456  | 38483  | 39082  |        | 10634  |        |        |        | 25004  |        | 36003  | 59513 | 31505  | 47688 | 38076 | 35237  | 50347  | 42882  | 40740  | 53340  | 57716  | 27015  | 61071  | 58397 | 16831  | 66709  | 58376  | 61374 |       |
| C33 H62 N4 O14        | 62323  | 63240  | 67233  | 64988  | 94219  | 88240  | 90607  | 91153  | 95033  | 93086  | 55694  | 75473  | 39789 | 56543  | 47743 | 51416 | 69109  | 65069  | 62939  | 82622  | 92213  | 38011  | 97792  | 74540  | 23174 | 85383  | 86207  | 81582  |       |       |
| C33 H66 Cl2 O P4      | 34332  | 29323  | 31085  | 27524  | 2383   | 6127   | 5781   | 4750   | 5356   | 5880   | 23591  | 25478  | 12892 | 33873  | 24922 | 16793 | 13770  | 27622  | 62108  | 17978  | 36550  | 27920  | 52623  | 37873  | 71140 | 73864  | 51964  | 43125  |       |       |
| C33 H66 N2 O P2       |        |        |        |        | 2623   | 4281   | 25190  | 282834 | 220877 |        | 20864  | 9438   | 6549  |        |       |       |        | 2397   | 7616   | 7642   |        | 20090  |        |        |       |        |        |        |       |       |
| C33 H66 N2 O3 S2      | 114413 | 108267 | 112835 | 116286 | 133304 | 117105 | 117806 | 130070 | 128870 | 136644 | 103376 | 118064 | 98649 | 102802 | 88677 | 97473 | 120815 | 115706 | 112260 | 132636 | 132251 | 77871  | 134985 | 108676 | 61998 | 126610 | 120702 | 129640 |       |       |
| C33 H69 N O4          |        |        |        |        | 113480 |        | 107380 | 4476   | 103028 | 113033 |        |        |       |        |       |       |        |        |        | 43323  |        | 22515  |        |        |       |        |        |        |       |       |
| C33 H69 N4 P S2       | 3059   | 17933  | 13551  | 3932   | 346482 | 369819 | 394641 | 329885 | 332465 | 325501 |        | 24946  |       |        |       |       | 6962   |        | 34845  | 28206  | 25674  | 18821  |        | 30330  |       | 24258  |        | 3961   |       |       |
| C34 H10 Cl N3 O3      |        |        |        |        | 57817  | 51001  | 52530  | 74392  | 79879  | 80058  |        |        |       |        |       |       |        | 1739   |        |        |        |        |        |        |       |        |        |        |       |       |
| C34 H25 N5 O3         | 30793  | 31783  | 31287  | 31233  | 7455   | 6724   | 6467   | 7987   | 7943   | 6506   | 28420  | 30006  | 19655 | 37127  | 27748 | 22550 | 21165  | 31288  | 55124  | 24960  | 36188  | 30154  | 43242  | 36550  | 55952 | 57080  | 47390  | 39388  |       |       |
| C34 H28 N2 O4         | 12091  | 5253   |        |        | 2091   | 18312  | 16299  | 20937  | 22149  | 22295  | 28154  |        | 10367 |        |       |       |        | 15838  |        |        | 1188   | 7709   |        |        |       |        | 9487   | 11845  | 15082 |       |
| C34 H29 Cl N6         | 20216  | 19014  | 18976  | 17708  | 7312   | 6315   | 6554   | 6989   | 6227   | 6466   | 19230  | 17999  | 13108 | 21223  | 17332 | 14881 | 12581  | 16814  | 25630  | 13021  | 18581  | 18994  | 25686  | 21990  | 33274 | 29643  | 27898  | 21076  |       |       |
| C34 H32 N8 O2         |        |        |        |        | 26766  | 25291  | 31792  | 27714  | 26283  | 25459  |        |        |       |        |       |       |        |        |        |        |        |        |        |        |       |        |        |        |       |       |
| C34 H47 N3 O10        | 14598  | 14675  | 11804  | 12713  | 115940 | 115429 | 114878 | 115143 | 108981 | 108367 | 16888  | 12747  | 3014  | 9602   | 9604  | 4907  | 20909  | 14872  | 22801  | 21848  | 26342  | 3049   | 22289  | 12379  | 1882  | 23579  | 8751   | 20538  |       |       |
| C34 H48 Cl N2 O5 P3 S |        |        |        |        | 7312   | 35501  | 35318  | 34069  | 32788  | 32993  | 33431  |        | 2496  |        |       |       |        | 8705   | 8908   | 32945  | 32000  | 14749  | 14666  |        |       |        |        |        |       |       |
| C34 H52 N3 O4 P5      |        |        |        |        | 27243  | 27213  | 25688  | 26577  | 25944  | 25191  |        |        |       |        |       |       |        |        |        | 6349   |        |        | 4683   |        |       |        |        |        |       |       |
| C34 H54 N2 O2 P2      | 1177   |        | 7333   |        | 21539  | 22120  | 21399  | 33673  | 21989  | 51070  |        | 2414   |       |        |       |       |        | 1245   |        |        | 3031   | 1458   |        |        |       |        | 1553   |        |       |       |
| C34 H55 N4 O4 P       | 19399  | 19537  | 19495  | 18642  | 15885  | 14163  | 13136  | 17199  | 16664  | 15119  | 21205  | 42620  |       | 8243   | 11237 | 10325 | 13265  | 23778  | 31073  | 23795  | 24887  | 1538   | 28933  | 26321  |       | 25683  | 20431  | 32061  |       |       |
| C34 H57 Cl N2 O       |        |        |        |        |        |        |        | 65130  |        | 13727  |        | 4248   | 4281  |        |       |       |        |        |        |        | 7344   |        |        |        |       |        |        |        |       |       |
| C34 H57 Cl N2 O2      | 3489   |        | 2108   | 3616   | 260377 |        |        |        | 271288 |        | 2760   |        |       |        |       |       |        | 3025   |        | 2859   | 3327   |        | 10429  | 12859  |       |        | 20120  | 1226   | 4422  |       |
| C34 H57 N4 O4 P       | 29941  | 30273  | 32048  | 28685  | 12711  | 24605  |        |        |        |        | 35652  | 36560  | 28357 | 22967  | 22773 | 17861 | 26340  | 34404  | 41764  | 43542  | 55460  |        | 58911  | 41681  |       | 57316  | 29680  | 59575  |       |       |
| C34 H58 N6 O2         | 64289  | 66418  | 65582  | 67770  | 216152 | 201427 | 204218 | 198694 | 232797 | 209019 | 53873  | 81624  | 3014  | 24118  | 39069 | 18483 | 53819  | 113744 | 82372  | 104599 | 93892  | 2535   | 91986  | 72621  |       | 85388  | 77271  | 97822  |       |       |
| C34 H60 N6 O2         |        |        |        |        | 16219  | 20696  | 19696  |        | 43985  | 43332  | 63931  | 22304  | 16316 | 1241   | 1945  | 20981 | 18503  | 53276  | 31543  | 25944  | 25172  | 29043  | 10642  | 33993  | 20480 | 6683   | 27466  | 29140  |       |       |
| C34 H62 N6 O2         | 127457 | 131816 | 138847 | 138584 | 234239 | 220428 | 232694 | 232911 | 257625 | 252390 | 128122 | 160126 | 10254 | 112223 | 69662 | 73872 | 127356 | 187401 | 157349 | 198606 | 171574 | 18692  | 162002 | 150392 |       | 174278 | 125707 | 188032 |       |       |
| C34 H62 N6 O4         |        |        |        |        | 13489  | 12166  |        | 290442 | 308716 | 316476 | 303028 |        |       |        |       |       |        |        | 19246  | 12218  | 22900  |        |        |        |       |        |        |        |       |       |
| C34 H63 Cl N2 O2      |        |        |        |        | 1565   | 1669   | 21428  | 350187 | 24243  | 382511 | 18457  | 23467  |       |        |       |       |        |        | 1542   |        |        |        |        |        |       |        |        |        |       |       |
| C34 H64 N2 O2 S4      | 2425   | 15301  | 2915   | 5083   | 18962  | 22121  | 17445  | 21494  | 16609  | 15334  | 4379   | 13501  | 5813  | 1867   | 3601  |       |        | 9623   | 8492   | 7432   | 6548   | 7402   |        |        | 6102  | 1503   | 6325   | 2085   | 16112 |       |
| C34 H65 O2 P3         | 6130   | 6468   | 6349   | 4763   | 55560  | 50863  | 50153  | 51361  | 54847  | 49701  | 9381   | 41323  | 5918  | 1862   | 10991 | 12717 | 14112  | 17712  | 25244  | 12537  | 21035  | 1072   | 14170  | 20383  | 3925  | 20045  | 20470  | 60416  |       |       |
| C34 H66 N6 O2         | 69203  | 68643  | 72409  | 73040  | 69984  | 63887  | 67371  | 71472  | 77877  | 73375  | 80596  | 79279  | 49579 | 70444  | 58520 | 74295 | 64813  | 63791  | 62922  | 80892  | 82560  | 31918  | 79534  | 69201  | 13230 | 73857  | 94606  | 68456  |       |       |
| C34 H70 S3            | 4011   |        |        |        | 3221   | 241602 | 164904 | 167631 | 241956 | 254078 | 254923 |        |       |        |       |       |        |        | 2766   | 7408   | 22244  | 24601  |        | 5053   |       |        |        |        |       |       |
| C35 H34 N6 O          |        |        |        |        | 197382 | 222224 | 192023 | 180784 | 186845 | 204934 |        |        |       |        |       |       |        |        |        |        |        |        |        |        |       |        |        |        |       |       |
| C35 H37 N O           | 21068  | 21442  | 19683  | 21920  | 78087  | 98265  | 97250  | 99887  | 99171  | 80943  | 31382  | 19150  |       | 14360  | 15104 | 10380 | 40085  | 44110  | 86082  | 66061  | 134063 |        | 34572  | 21628  |       | 45345  | 18180  | 100912 |       |       |
| C35 H40 N14           | 12458  | 12047  | 6807   | 3204   | 22531  | 20405  | 19449  | 17281  | 12119  | 18469  | 4997   | 8059   | 3454  | 3719   | 2432  | 3588  |        |        | 5020   | 7133   | 8819   |        | 3510   | 4327   | 2835  | 2568   | 3547   | 4337   | 3937  |       |
| C35 H44 N8 O P        |        |        |        |        | 1323   |        | 10231  | 10042  | 14507  | 13124  | 14591  | 13117  |       |        |       |       |        |        | 1302   |        |        |        |        |        |       |        |        | 1708   | 1099  | 2000  |
| C35 H45 Cl N2 O2 S3   | 8272   | 7341   | 7943   | 7725   | 45860  | 46710  | 45170  | 43165  | 46365  | 44128  |        |        |       |        |       |       |        |        |        |        |        |        |        |        |       |        |        |        |       |       |
| C35 H49 N7 O5 S2      | 36104  | 34684  | 35316  | 31899  |        |        |        |        |        |        | 2416   | 21468  | 53370 | 22235  | 4728  |       |        |        | 89377  | 29442  | 60104  | 19938  | 20375  | 13499  | 52882 | 31097  | 37562  | 27753  | 66114 | 22259 |
| C35 H56 N O2 P3       |        |        |        |        | 34085  | 33682  | 20774  | 7693   | 19834  | 15599  |        |        |       |        |       |       |        |        | 1866   |        |        |        |        |        |       |        |        |        |       |       |
| C35 H57 N7 O2 S       | 51596  | 49607  | 48361  | 41561  | 47166  | 23610  | 50144  | 37977  | 54286  | 46975  | 46156  |        |       |        |       |       |        |        |        |        |        |        |        |        |       |        |        |        |       |       |
| C35 H58 N10           |        |        |        |        | 11986  | 11967  |        | 12755  | 13039  | 14448  | 14984  | 15962  | 14470 |        |       |       |        |        |        |        |        |        |        |        |       |        |        |        |       |       |
| C35 H62 N8 O8         | 62917  | 59532  | 61174  | 55882  | 164500 | 157996 | 159482 | 162142 | 166052 | 162053 | 54208  | 88469  | 4928  | 42858  | 38705 | 28269 | 65098  | 89199  | 85034  | 95273  | 108955 | 8626   | 101136 | 73948  | 2457  | 99502  | 64843  | 127836 |       |       |
| C35 H63 N5            | 97581  | 100853 | 97934  | 92476  |        |        |        |        |        |        | 324667 | 322925 |       |        |       |       |        |        | 128732 | 33023  | 190450 | 211595 | 90261  |        |       |        |        |        |       |       |







Compound

| Compound                                                         | Neg Pool OC1 | Neg Pool OC2 | Neg Pool OC3 | Neg Pool OC4 | Neg_Human Plasma Extraction_1 | Neg_Human Plasma Extraction_2 | Neg_Human Plasma Extraction_3 | Neg_Human Plasma Extraction_4 | Neg_Human Plasma Extraction_5 | Neg_Human Plasma Extraction_6 | Neg_S00015442_1 | Neg_S00015442_2 | Neg_S00015442_3 | Neg_S00015450_4 | Neg_S00015451_5 | Neg_S00015452_6 | Neg_S00015453_7 | Neg_S00015454_8 | Neg_S00015455_9 | Neg_S00015456_10 | Neg_S00015457_11 | Neg_S00015458_12 | Neg_S00015459_13 | Neg_S00015460_14 | Neg_S00015461_15 | Neg_S00015462_16 | Neg_S00015463_17 | Neg_S00015464_18 |  |
|------------------------------------------------------------------|--------------|--------------|--------------|--------------|-------------------------------|-------------------------------|-------------------------------|-------------------------------|-------------------------------|-------------------------------|-----------------|-----------------|-----------------|-----------------|-----------------|-----------------|-----------------|-----------------|-----------------|------------------|------------------|------------------|------------------|------------------|------------------|------------------|------------------|------------------|--|
| CHOLESTEROL HYDROGEN SULFATE (CAS# 1256-86-6); (M-H)-            |              |              |              |              |                               |                               |                               |                               |                               |                               |                 |                 |                 |                 |                 |                 |                 |                 |                 |                  |                  |                  |                  |                  |                  |                  |                  |                  |  |
| GIBBERELLIC ACID [STD] (CAS# 77-06-5); (2M-H)-                   | 50257        | 46252        | 43144        | 43518        | 13663                         | 13346                         | 13105                         | 12674                         | 13365                         | 11963                         | 37270           | 40887           | 23046           | 47284           | 35972           | 27258           | 26145           | 38573           | 77838           | 27843            | 46048            | 37279            | 74244            | 56681            | 102958           | 103514           | 66478            | 58220            |  |
| HIPPURATE (CAS# 495-69-2); (M-H)-                                | 46653        | 45384        | 42326        | 43438        | 836513                        | 826543                        | 816475                        | 789935                        | 804273                        | 795070                        |                 | 18772           | 10836           | 2131            | 46386           | 4203            | 141709          | 78404           | 53053           | 12428            | 232651           | 5379             |                  |                  |                  |                  |                  |                  |  |
| 2,3-DIHYDROXY-2-PHOSPHONOPROPANOIC ACID (CAS# 2553-59-5); (M-H)- |              |              |              |              |                               |                               |                               |                               |                               |                               |                 |                 |                 |                 |                 |                 |                 |                 |                 |                  |                  |                  |                  |                  |                  |                  |                  |                  |  |
| MONO-METHYL GLUTARATE (CAS# 1501-27-5); (M-H)-                   | 54425        | 51084        | 49512        | 49639        | 40686                         | 42558                         | 40186                         | 41490                         | 42579                         | 38773                         | 27882           | 19022           |                 | 11889           | 47783           | 24482           | 21081           | 52243           | 113097          | 35070            | 52289            |                  |                  |                  |                  |                  |                  |                  |  |
| GUANOSINE 5'-PHOSPHATE (CAS# 85-32-5); (2M-H)+                   |              |              |              |              |                               |                               |                               |                               |                               |                               |                 |                 |                 |                 |                 |                 |                 |                 |                 |                  |                  |                  |                  |                  |                  |                  |                  |                  |  |
| PTERIN (CAS# 2236-60-4); (M-H)-                                  |              |              |              |              |                               |                               |                               |                               |                               |                               |                 |                 |                 |                 |                 |                 |                 |                 |                 |                  |                  |                  |                  |                  |                  |                  |                  |                  |  |
| TRANS-ACONITATE (CAS# 4023-65-8); (M-H)-                         |              |              |              |              | 14565                         | 841007                        | 794295                        | 789491                        | 763835                        | 764002                        | 731517          | 185059          |                 |                 |                 |                 |                 |                 |                 |                  |                  |                  |                  |                  |                  |                  |                  |                  |  |
| D-(-)-ARABINOSE (CAS# 10323-20-3); (M+HCOO)-                     |              |              |              |              |                               |                               |                               |                               |                               |                               |                 |                 |                 |                 |                 |                 |                 |                 |                 |                  |                  |                  |                  |                  |                  |                  |                  |                  |  |
| GIBBERELLIC ACID [STD] (CAS# 77-06-5); (M+Cl)-                   | 53351        | 50205        | 49445        | 49324        | 30036                         | 28862                         | 29118                         | 30252                         | 29117                         | 26279                         | 47304           | 47972           | 38324           | 52115           | 45362           | 39213           | 40780           | 46455           | 64469           | 41538            | 54225            | 46409            | 62959            | 54466            | 71650            | 70209            | 60577            | 55483            |  |
| NONANOATE (CAS# 112-05-0); (M-H)-                                | 28386        | 29158        | 28439        | 28990        |                               |                               |                               |                               |                               |                               |                 |                 |                 |                 |                 |                 |                 |                 |                 |                  |                  |                  |                  |                  |                  |                  |                  |                  |  |
| ARACHIDIC ACID (CAS# 506-30-9); (M-H)-                           | 9712         | 14523        | 14892        | 14065        | 5240                          | 6087                          | 6036                          | 7001                          | 6867                          | 7648                          | 22073           | 21701           |                 | 15172           | 8314            | 16500           | 14733           | 18057           | 23378           | 15315            | 47432            | 7457             | 16682            | 11566            | 2810             | 16414            | 24276            | 18352            |  |
| ALPHA-LINOLENIC ACID (CAS# 463-40-1); (M+HCOO)-                  | 451623       | 482919       | 501454       | 501700       | 48257                         | 454368                        | 480951                        | 497333                        | 522874                        | 517633                        | 461453          | 475874          | 442607          | 492269          | 451928          | 457300          | 482894          | 515080          | 470038          | 518566           | 509761           | 394454           | 506524           | 465949           | 371705           | 504296           | 525901           | 461853           |  |
| N-ACETYLGLYCINE (CAS# 543-24-8); (M-H)-                          |              |              |              |              |                               |                               |                               |                               |                               |                               |                 |                 |                 |                 |                 |                 |                 |                 |                 |                  |                  |                  |                  |                  |                  |                  |                  |                  |  |
| DEOXYHOLIC ACID (CAS# 83-44-3); (M-H)-                           |              |              |              |              |                               |                               |                               |                               |                               |                               |                 |                 |                 |                 |                 |                 |                 |                 |                 |                  |                  |                  |                  |                  |                  |                  |                  |                  |  |
| XYLOSE (CAS# 58-86-6); (M+HCOO)-                                 |              |              | 9470         |              | 117795                        | 110087                        | 116607                        | 118800                        | 112440                        | 112857                        |                 |                 |                 |                 |                 |                 |                 |                 |                 |                  |                  |                  |                  |                  |                  |                  |                  |                  |  |
| TYROSINE (CAS# 60-18-4); (M-H)-                                  | 407544       | 324430       | 337281       | 328089       | 309082                        | 302476                        | 297472                        | 287321                        | 296563                        | 331514                        | 293543          | 67824           | 220917          | 315852          | 432896          | 317871          | 613251          | 592665          | 370396          | 499880           | 284051           | 381473           | 451344           | 41803            | 644888           | 288874           | 581644           |                  |  |
| 3-HYDROXY-3-METHYLGUTARATE (CAS# 503-49-1); (M-H)-               | 18481        | 14180        | 15250        | 15421        | 109168                        | 93057                         | 93644                         | 111678                        | 97825                         | 98078                         |                 |                 |                 |                 |                 |                 |                 |                 |                 |                  |                  |                  |                  |                  |                  |                  |                  |                  |  |
| N-METHYL-D-ASPARTIC ACID (CAS# 6384-92-5); (M-H)-                | 336778       | 333946       | 361211       | 340056       | 53086                         |                               |                               |                               |                               |                               |                 |                 |                 |                 |                 |                 |                 |                 |                 |                  |                  |                  |                  |                  |                  |                  |                  |                  |  |
| ADIPIC ACID (CAS# 124-04-9); (M-H)-                              | 54425        | 51084        | 49545        | 49639        | 40621                         | 42611                         | 40134                         | 41618                         | 42522                         | 38773                         | 27882           | 19022           |                 | 11889           | 47783           | 24482           | 21081           | 52243           | 113097          | 35070            | 52289            |                  |                  |                  |                  |                  |                  |                  |  |
| TRICARBALLIC ACID (CAS# 99-14-9); (M-H)-                         |              |              |              |              |                               |                               |                               |                               |                               |                               |                 |                 |                 |                 |                 |                 |                 |                 |                 |                  |                  |                  |                  |                  |                  |                  |                  |                  |  |
| INOSINE (CAS# 58-63-9); (M-H)-                                   | 3393489      | 3217383      | 1947154      | 3235410      | 82480                         | 82249                         | 75999                         | 81971                         | 84571                         | 1954422                       | 1545078         | 648904          | 2630326         | 2326671         | 1041397         | 6173835         | 4409568         | 5039280         | 3341644         | 3264693          | 1479630          | 3130446          | 2174303          | 207342           | 3142147          | 2695749          | 3568358          |                  |  |
| RAFFINOSE (CAS# 512-69-6); (M+Cl)-                               | 212120       | 233216       | 227829       | 233901       |                               |                               |                               |                               |                               |                               |                 |                 |                 |                 |                 |                 |                 |                 |                 |                  |                  |                  |                  |                  |                  |                  |                  |                  |  |
| TAURINE (CAS# 107-35-7); (M-H)-                                  | 609286       | 594931       | 579961       | 575381       | 30774                         | 25620                         | 30931                         | 27549                         | 29662                         | 7060                          | 811250          | 856240          |                 | 558916          | 850285          | 861271          | 800714          | 567316          | 547098          | 369255           | 426127           | 488390           |                  |                  |                  |                  |                  |                  |  |
| DIETHYLSTIBESTROL (CAS# 56-53-1); (M-H)-                         |              |              |              |              |                               |                               |                               |                               |                               |                               |                 |                 |                 |                 |                 |                 |                 |                 |                 |                  |                  |                  |                  |                  |                  |                  |                  |                  |  |
| (S)-3-METHYL-2-OXPENTANOATE (CAS# 1460-34-0); (M+)               | 23718        | 25047        | 19576        | 24388        | 1867888                       | 1867747                       | 1822256                       | 1837820                       | 1821625                       | 1738295                       |                 |                 |                 |                 |                 |                 |                 |                 |                 |                  |                  |                  |                  |                  |                  |                  |                  |                  |  |
| 2-HYDROXY-3-METHYLBUTYRIC ACID (CAS# 4026-18-0); (M+)            | 68586        | 69755        | 66587        | 63777        | 1015303                       | 989421                        | 963225                        | 939521                        | 972149                        | 14930                         | 82574           | 9860            |                 |                 |                 |                 |                 |                 |                 |                  |                  |                  |                  |                  |                  |                  |                  |                  |  |
| CIS-7,10,13,16-DICOSATETRAENOIC ACID (CAS# 28874-58-0)           | 5728         | 5007         | 4236         | 4921         | 4628                          | 9620                          | 9336                          | 5943                          | 4813                          | 5948                          | 1457            |                 |                 |                 |                 |                 |                 |                 |                 |                  |                  |                  |                  |                  |                  |                  |                  |                  |  |
| CORTISONE (CAS# 53-06-5); (M+Cl)-                                | 2189         | 1955         | 1320         | 1548         | 28785                         | 29211                         | 29253                         | 29539                         | 28005                         | 27552                         | 2157            |                 |                 |                 |                 |                 |                 |                 |                 |                  |                  |                  |                  |                  |                  |                  |                  |                  |  |
| HEXACOSANOIC ACID (CAS# 506-46-7); (M-H)-                        | 34533        | 31628        | 27792        | 31084        |                               |                               |                               |                               |                               |                               |                 |                 |                 |                 |                 |                 |                 |                 |                 |                  |                  |                  |                  |                  |                  |                  |                  |                  |  |
| 11-DEOXYCORTISOL (CAS# 152-58-7); (M+HCOO)-                      |              |              |              |              |                               |                               |                               |                               |                               |                               |                 |                 |                 |                 |                 |                 |                 |                 |                 |                  |                  |                  |                  |                  |                  |                  |                  |                  |  |
| DECANOATE (CAS# 334-48-5); (M-H)-                                | 22430        | 23327        | 23495        | 23440        | 16222                         | 14412                         | 16717                         | 16463                         | 16031                         | 18006                         | 14633           | 22492           | 11411           | 23055           | 14491           | 10541           | 25745           | 34829           | 40686           | 27247            | 33086            | 11455            | 34453            | 32541            | 8682             | 28747            | 21006            | 26375            |  |
| STEARATE (CAS# 57-11-4); (M-H)-                                  | 1248190      | 1356301      | 1404064      | 1374009      | 1612867                       | 1505152                       | 1589883                       | 1676032                       | 1850681                       | 1714883                       | 1565062         | 1675774         | 1010872         | 1336953         | 1133358         | 1386597         | 1265848         | 1329842         | 1296738         | 1670751          | 1689189          | 773949           | 1642948          | 1340447          | 519404           | 1466799          | 1971321          | 1332926          |  |
| CIS-VACCENIC ACID (CAS# 506-12-7); (M-H)-                        | 2200452      | 2246825      | 2383423      | 2333273      | 4578393                       | 4377086                       | 4675424                       | 4722233                       | 5114890                       | 4866890                       | 2222956         | 2932617         | 470396          | 1874049         | 1848271         | 1321191         | 2315616         | 3044264         | 2795376         | 3052671          | 3204952          | 580299           | 3022238          | 2667418          | 80120            | 3029775          | 2403120          | 3426477          |  |
| OMEGA-HYDROXYDODECANOIC ACID (CAS# 505-95-3); (M+)               | 6785         | 10161        | 8299         | 6767         | 5416                          | 4982                          | 3222                          | 3785                          | 1872                          | 3400                          | 3792            | 5889            | 3842            | 4182            | 5171            | 2904            | 8004            | 6827            | 12951           | 8506             | 10345            | 6027             | 12289            | 12706            | 4293             | 12095            | 5066             | 5879             |  |
| SALICYLIC ACID (CAS# 487-54-7); (M-H)-                           |              |              |              |              |                               |                               |                               |                               |                               |                               |                 |                 |                 |                 |                 |                 |                 |                 |                 |                  |                  |                  |                  |                  |                  |                  |                  |                  |  |
| CIS-ZEATIN (CAS# 1637-39-4); (M+Cl)-                             | 1262394      | 1214463      | 1175325      | 1179909      | 1088759                       | 1042325                       | 1023905                       | 1054016                       | 1050914                       | 1012686                       | 1147535         | 1234596         | 1092031         | 1226566         | 1181863         | 1093038         | 1084816         | 1159462         | 1381980         | 1078927          | 1218485          | 1235920          | 1343159          | 1243819          | 1474228          | 1374567          | 1335296          | 1218619          |  |
| THEOPHYLLINE (CAS# 58-55-9); (M-H)-                              | 79508        | 78756        | 74881        | 76620        | 594677                        | 575505                        | 552233                        | 533092                        | 568787                        | 555372                        | 17390           | 85098           |                 |                 |                 |                 |                 |                 |                 |                  |                  |                  |                  |                  |                  |                  |                  |                  |  |
| TRICARBALLIC ACID (CAS# 99-14-9); (M+H)-[H2O]                    |              |              |              |              |                               |                               |                               |                               |                               |                               |                 |                 |                 |                 |                 |                 |                 |                 |                 |                  |                  |                  |                  |                  |                  |                  |                  |                  |  |
| 6-CARBOXYHEXANOATE (CAS# 111-16-0); (M-H)-                       | 18986        | 18364        | 15993        | 15663        | 5792                          | 5044                          | 5163                          | 6024                          | 6450                          | 6126                          | 8082            | 6612            |                 |                 |                 |                 |                 |                 |                 |                  |                  |                  |                  |                  |                  |                  |                  |                  |  |
| THREONINE (CAS# 72-19-5); (M+HCOO)-[H2O]                         | 313474       | 333946       | 361211       | 340056       |                               |                               |                               |                               |                               |                               |                 |                 |                 |                 |                 |                 |                 |                 |                 |                  |                  |                  |                  |                  |                  |                  |                  |                  |  |
| 1,3,7-TRIMETHYLRIC ACID (CAS# 5415-44-1); (M-H)-                 |              |              |              |              |                               |                               |                               |                               |                               |                               |                 |                 |                 |                 |                 |                 |                 |                 |                 |                  |                  |                  |                  |                  |                  |                  |                  |                  |  |
| GLYCERALDEHYDE (CAS# 367-47-5); (2M-H)-[H2O]                     |              |              |              |              |                               |                               |                               |                               |                               |                               |                 |                 |                 |                 |                 |                 |                 |                 |                 |                  |                  |                  |                  |                  |                  |                  |                  |                  |  |
| N-ETHYLMALIMIDE (CAS# 128-53-0); (M-H)-                          |              |              |              |              |                               |                               |                               |                               |                               |                               |                 |                 |                 |                 |                 |                 |                 |                 |                 |                  |                  |                  |                  |                  |                  |                  |                  |                  |  |
| CIS-ACONITATE (CAS# 585-84-2); (M-H)-                            |              |              |              |              |                               |                               |                               |                               |                               |                               |                 |                 |                 |                 |                 |                 |                 |                 |                 |                  |                  |                  |                  |                  |                  |                  |                  |                  |  |
| ZEATIN (CAS# 1637-39-4); (M-H)-                                  | 5150839      | 4948356      | 4846205      | 4879881      | 3666881                       | 3587482                       | 3524702                       | 3483908                       | 3552764                       | 3422781                       | 4734372         | 4940454         | 4521397         | 5287717         | 4380612         | 4561982         | 3924479         | 4681290         | 5641733         | 4084019          | 4564538          | 5185517          | 5573641          | 4987998          | 7043392          | 6115498          | 6002832          |                  |  |

|                                                     |         |         |         |         |         |         |         |         |         |         |         |         |        |         |         |         |         |         |         |         |         |         |         |         |         |         |         |         |  |
|-----------------------------------------------------|---------|---------|---------|---------|---------|---------|---------|---------|---------|---------|---------|---------|--------|---------|---------|---------|---------|---------|---------|---------|---------|---------|---------|---------|---------|---------|---------|---------|--|
| MALATE (CAS# 97-67-6); (M-H)-                       | 58614   | 74004   | 60934   | 82666   | 303493  | 292253  | 289540  | 270605  | 257950  | 249462  | 330870  | 65263   | 26118  | 267645  | 50146   | 2549    | 24195   | 62952   | 35383   | 81067   | 25269   | 33475   | 60621   | 157028  | 110252  |         |         |         |  |
| EPYBRASSINOLIDE [ISTD] (CAS# 78821-43-9); (M+C)-    | 980526  | 903121  | 878398  | 860421  | 452278  | 421144  | 436153  | 410093  | 410215  | 393581  | 791577  | 832595  | 680179 | 954759  | 815088  | 700400  | 703867  | 870252  | 1102978 | 679768  | 938716  | 930979  | 1188642 | 980801  | 1550329 | 1317646 | 1106258 | 1028462 |  |
| L-GULONATE (CAS# 6322-07-2); (M-H)-                 |         |         |         |         |         |         |         |         |         |         |         |         |        |         |         |         |         |         |         |         |         |         |         |         |         |         |         |         |  |
| CITRULLINE (CAS# 372-75-8); (M-H)-                  | 589652  | 579535  | 576891  | 563818  |         |         |         |         |         |         |         |         |        |         |         |         |         |         |         |         |         |         |         |         |         |         |         |         |  |
| BEHENIC ACID (CAS# 112-85-6); (M-H)-                | 19207   | 21057   | 22606   | 19802   | 5648    | 5209    | 5042    | 6555    | 6595    | 6799    | 32359   | 21655   |        | 19874   | 5449    | 23823   | 43795   | 89988   | 43053   | 112139  | 9479    | 28405   | 28470   |         |         |         |         |         |  |
| N-ACETYL-DL-METHIONINE (CAS# 1115-47-5); (M-H)-     | 74584   | 73357   | 70725   | 71242   | 22063   | 20581   | 23246   | 22712   | 20123   | 21031   | 80988   | 127358  | 10035  | 44919   | 71825   | 67319   | 62025   | 137765  | 231893  | 67128   | 221007  | 18638   | 97764   |         |         |         |         |         |  |
| GLUTAMATE (CAS# 56-86-0); (M-H)-                    | 336778  | 333946  | 361211  | 340056  | 53086   |         |         |         |         |         |         |         |        |         |         |         |         |         |         |         |         |         |         |         |         |         |         |         |  |
| ARACHIDONATE (CAS# 506-32-1); (M-H)-                | 2162546 | 2190849 | 2191096 | 2119308 | 1486898 | 1408050 | 1498791 | 1542453 | 1612528 | 1501489 | 2634697 | 2342652 | 94454  | 613608  | 2350139 | 1323434 | 1859516 | 4128884 | 3229199 | 3063736 | 4751292 | 375342  | 3854319 | 2259185 | 14161   | 2046862 | 1884319 | 4493087 |  |
| GLUCARIC ACID (CAS# 87-73-0); (M-H)-[H2O]           | 25081   | 36296   | 29013   | 13590   | 5419210 | 5646061 | 5220357 | 4833424 | 5128682 | 4766202 | 298050  | 3934    |        | 86416   | 172715  | 29137   | 22795   | 33313   | 142898  | 26323   | 46684   | 2582    |         |         |         |         |         |         |  |
| CIS-11-EICOSENOIC ACID (CAS# 5561-99-9); (M-H)-     | 27430   | 27962   | 30029   | 27177   | 49824   | 44261   | 49948   | 49662   | 55318   | 54581   | 43348   | 142246  | 4512   | 28290   | 51064   | 20983   | 34156   | 25573   | 41799   | 51689   | 69570   | 4729    | 56705   | 31194   |         |         |         |         |  |
| URATE (CAS# 69-93-2); (M-H)-                        | 728312  | 836301  | 736881  | 836407  | 3476872 | 3326100 | 3356511 | 3392986 | 3507728 | 3376438 | 1663664 | 278771  |        | 296466  | 2032550 | 562710  | 1095610 | 706709  | 261303  | 1817172 | 1827438 | 342322  | 591612  | 127045  | 42743   | 1038537 | 464974  | 1432354 |  |
| KYNURENINE (CAS# 343-65-7); (M-H)-                  | 1090    | 1742    |         |         | 16546   | 13955   | 15312   | 13282   | 12455   | 12669   |         |         |        |         |         |         |         |         |         |         |         |         |         |         |         |         |         |         |  |
| LYSINE (CAS# 56-87-1); (M-H)-                       | 7758    | 8724    | 7317    | 8399    | 54779   |         |         |         |         |         |         |         |        |         |         |         |         |         |         |         |         |         |         |         |         |         |         |         |  |
| 4-HYDROXYBENZOATE (CAS# 99-96-7); (M-H)-            | 506722  | 503298  | 485691  | 488479  | 6758    |         |         |         |         |         |         |         |        |         |         |         |         |         |         |         |         |         |         |         |         |         |         |         |  |
| 2-HYDROXYBUTYRATE (CAS# ); (M-H)-                   |         |         |         |         |         |         |         |         |         |         |         |         |        |         |         |         |         |         |         |         |         |         |         |         |         |         |         |         |  |
| 3-DEHYDROSHIKIMATE (CAS# 2922-42-1); (M-H)-         |         |         |         |         |         |         |         |         |         |         |         |         |        |         |         |         |         |         |         |         |         |         |         |         |         |         |         |         |  |
| 4-NITROPHENOL (CAS# 100-02-7); (M-H)-               | 86292   | 80625   | 76602   | 74408   | 18516   | 20789   | 24110   | 19686   | 20418   | 17571   | 28546   | 41124   | 28952  | 29868   | 112992  | 38679   | 37330   | 52275   | 82886   | 46850   | 41735   | 19108   | 70887   | 43931   | 21079   | 65177   | 37945   | 55441   |  |
| 1-METHYLURIC ACID (CAS# 708-79-2); (2M-H)-          |         |         |         |         |         |         |         |         |         |         |         |         |        |         |         |         |         |         |         |         |         |         |         |         |         |         |         |         |  |
| OLEIC ACID (CAS# 112-80-1); (M-H)-                  | 2200452 | 2246825 | 2383423 | 2333273 | 4581859 | 4379810 | 4675737 | 4726518 | 5114890 | 4872846 | 2222956 | 2932617 | 470396 | 1874049 | 1848271 | 1321191 | 2315616 | 3044264 | 2795376 | 3052671 | 3209138 | 580299  | 3022238 | 2667418 | 80120   | 3029775 | 2403120 | 3430366 |  |
| D-LYXOSE (CAS# 1114-34-7); (M+HCOO)-                |         |         |         |         |         |         |         |         |         |         |         |         |        |         |         |         |         |         |         |         |         |         |         |         |         |         |         |         |  |
| TRYPTOPHAN (CAS# 73-22-3); (2M-H)-                  |         |         |         |         |         |         |         |         |         |         |         |         |        |         |         |         |         |         |         |         |         |         |         |         |         |         |         |         |  |
| CORTISOL (CAS# 50-23-7); (M+HCOO)-                  | 13464   | 12616   | 13109   | 12715   | 636440  | 619539  | 647206  | 591125  | 599039  | 586129  | 12232   | 5316    | 1537   |         |         |         |         |         |         |         |         |         |         |         |         |         |         |         |  |
| METHYLMALONATE (CAS# 516-05-2); (M-H)-              | 253387  | 237950  | 229909  | 225392  | 379570  | 364663  | 356842  | 5743    | 343646  | 332279  | 385278  | 100823  |        | 132582  | 280653  | 208118  |         |         |         |         |         |         |         |         |         |         |         |         |  |
| 4-METHYL-2-OXOPENTANOATE (CAS# 816-66-0); (M-H)-    | 63695   | 59472   | 51886   | 60632   | 3132882 | 3037252 | 2977361 | 2935520 | 292537  | 2843260 | 20228   | 44501   |        | 9661    | 33454   | 15209   | 101696  | 65109   | 176258  | 12993   | 221149  | 24541   | 73562   | 44960   |         |         |         |         |  |
| 16:0 LYSDO PC (CAS# 17364-16-8); (M+HCOO)-          | 127984  | 118679  | 112512  | 110276  | 3210624 | 3106695 | 3186391 | 2970551 | 2903151 | 2705662 | 96041   | 69801   | 23174  | 30033   | 39803   | 66482   | 87313   | 151603  | 129066  | 279613  | 275004  | 51392   | 135532  | 104585  | 8221    | 75533   | 57752   | 212627  |  |
| CORTICOSTERONE (CAS# 50-22-6); (M+HCOO)-            |         |         |         |         |         |         |         |         |         |         |         |         |        |         |         |         |         |         |         |         |         |         |         |         |         |         |         |         |  |
| L-RHAMNOSE (CAS# 10030-85-0); (M+C)-                | 88876   | 84527   |         |         | 297986  | 291385  | 283657  | 274879  | 265511  |         |         |         |        |         |         |         |         |         |         |         |         |         |         |         |         |         |         |         |  |
| 1-HYDROXY-2-NAPHTHOATE (CAS# 86-48-6); (M-H)-       |         |         |         |         |         |         |         |         |         |         |         |         |        |         |         |         |         |         |         |         |         |         |         |         |         |         |         |         |  |
| ACETAMINOPHEN (TN TYLENOL) (CAS# 103-90-2); (M-H)-  | 7387    | 6975    | 6654    | 7449    | 7667    | 7324    | 7506    | 7357    | 7298    | 7249    |         |         |        |         |         |         |         |         |         |         |         |         |         |         |         |         |         |         |  |
| CYCLOHEPTANECARBOXYLIC ACID (CAS# 1460-16-8); (M+H) | 174392  | 178773  | 171492  | 168453  | 71492   | 65897   | 69205   | 65390   | 68396   | 64953   | 119519  | 128512  | 42022  | 67161   | 358076  | 201294  | 137045  | 286131  | 344754  | 222662  | 287032  | 67644   | 172183  | 139569  | 55469   | 236467  | 105026  | 390046  |  |
| 3-(4-HYDROXYPHENYL)LACTATE (CAS# 6482-98-0); (M-H)- | 11208   | 13453   | 14046   | 11205   | 190356  | 176878  | 175873  | 174819  | 176890  | 165662  | 20952   | 8435    |        | 7416    | 25722   | 12343   | 10398   | 23771   | 15511   | 18581   | 49441   |         |         |         |         |         |         |         |  |
| 1,3-DIMETHYLURIC ACID (CAS# 944-73-0); (M-H)-       |         |         |         |         |         |         |         |         |         |         |         |         |        |         |         |         |         |         |         |         |         |         |         |         |         |         |         |         |  |
| ELAIDIC ACID (CAS# 112-79-8); (M-H)-                | 2200452 | 2246825 | 2383423 | 2333273 | 4578411 | 4377086 | 4675479 | 4722233 | 5114890 | 4866890 | 2222956 | 2932617 | 470396 | 1874049 | 1848271 | 1321191 | 2315616 | 3044264 | 2795376 | 3052671 | 3204756 | 580299  | 3022238 | 2667418 | 80120   | 3029775 | 2403120 | 3426477 |  |
| URIDINE (CAS# 58-96-8); (M+C)-                      | 3503462 | 3201514 | 3238420 | 3191118 | 361858  | 354900  | 350762  | 578707  | 527000  | 480806  | 4116900 | 2470510 | 233380 | 1056439 | 1212374 | 2232223 | 4147652 | 6533600 | 8978312 | 4271198 | 7797565 | 1115299 | 5359348 | 4638156 | 6833874 | 2503737 | 7604267 |         |  |
| MYRISTOLEIC ACID (CAS# 544-64-9); (M-H)-            | 6984    | 9820    | 10029   | 9265    | 16756   | 15992   | 17359   | 16374   | 19050   | 17825   | 2773    | 11388   |        | 5147    | 3835    | 2966    | 5338    | 25369   | 34465   | 18692   | 19738   | 1638    | 10603   | 11322   |         |         |         |         |  |
| NAPROXEN (CAS# 22204-53-1); (M-H)-                  |         |         |         |         |         |         |         |         |         |         |         |         |        |         |         |         |         |         |         |         |         |         |         |         |         |         |         |         |  |
| L-[15N]ANTHRANILIC ACID [ISTD] (CAS# ); (M-H)-      | 1098351 | 1099922 | 1059011 | 1074154 | 172092  | 172075  | 168708  | 167610  | 173657  | 175827  | 951362  | 418154  | 271808 | 482335  | 455817  | 369683  | 837766  | 1137133 | 1414191 | 959187  | 1120660 | 593249  | 1304413 | 1236346 | 423814  | 1635585 | 519471  | 1296133 |  |
| GAMMA-LINOLENIC ACID (CAS# 506-26-3); (M+HCOO)-     | 451623  | 482919  | 501454  | 501700  | 482857  | 480951  | 497333  | 522874  | 517633  | 461453  | 475874  | 442607  | 492269 | 451928  | 482894  | 515080  | 470038  | 518569  | 509761  | 506524  | 465949  | 371705  | 506294  | 529590  | 6833874 | 2503737 | 7604267 |         |  |
| LIGNOCERIC ACID (CAS# 557-59-5); (M-H)-             | 66171   | 73782   | 73196   | 69778   | 13831   | 12677   | 11737   | 25008   | 26354   | 18820   | 37669   |         |        | 1961    | 31758   | 13595   | 55312   | 122409  | 149324  | 389330  | 368426  | 479999  | 37611   | 147218  | 102234  | 202682  | 98772   | 501410  |  |
| 1,7-DIMETHYL URIC ACID (CAS# 33868-03-0); (M-H)-    | 2619    |         | 2102    | 2570    | 93717   | 90629   | 86258   | 85171   | 86332   | 86991   | 3447    |         |        |         |         |         |         |         |         |         |         |         |         |         |         |         |         |         |  |
| ALPHA-KETO-GLUTARATE (CAS# 328-50-7); (M-H)-        |         |         |         |         |         |         |         |         |         |         |         |         |        |         |         |         |         |         |         |         |         |         |         |         |         |         |         |         |  |
| VALINE (CAS# 72-18-4); (M-H)-                       | 19589   | 22515   | 24805   | 21539   |         |         |         |         |         |         |         |         |        |         |         |         |         |         |         |         |         |         |         |         |         |         |         |         |  |
| DIACETYL (CAS# 431-03-8); (M+HCOO)-                 | 21928   | 22746   | 21617   | 19158   | 22968   | 23323   | 19055   | 19561   | 21393   | 14266   | 11888   | 5238    |        | 7416    | 20524   | 15667   | 6934    | 14924   | 24452   | 15439   | 17872   |         |         |         |         |         |         |         |  |
| URSODIOL (CAS# 128-13-2); (M+HCOO)-                 | 5733    | 6249    | 4693    | 5297    | 44434   | 42923   | 45212   | 42553   | 46182   | 45027   |         |         |        |         |         |         |         |         |         |         |         |         |         |         |         |         |         |         |  |
| D-LYXOSE (CAS# 1114-34-7); (M-H)-                   |         |         |         |         |         |         |         |         |         |         |         |         |        |         |         |         |         |         |         |         |         |         |         |         |         |         |         |         |  |
| URIDINE (CAS# 58-96-8); (M-H)-                      | 1672007 | 1498290 | 1556182 | 1564614 | 145046  | 137300  | 142287  | 155584  | 154350  | 151761  | 1798129 | 1586680 | 574437 | 1219049 | 1422068 | 1020277 | 2331936 | 2551078 | 3065925 | 1801528 | 2609351 | 992430  | 2660977 | 2076216 | 221528  | 2856582 | 1498048 | 2480974 |  |
| PANTOTHENATE (CAS# 79-83-4); (M-H)-                 | 71830   | 65091   |         |         |         |         |         |         |         |         |         |         |        |         |         |         |         |         |         |         |         |         |         |         |         |         |         |         |  |





| Compound                              | Component 1 (37.24%) | Component 2 (13.61%) | Component 3 (10.51%) | Component 4 (5.96%) |
|---------------------------------------|----------------------|----------------------|----------------------|---------------------|
| C25 H21 P                             | 2.9095829            | -1.5176756           | 1.3550706            | -0.4442433          |
| C7 H2 Cl N O3                         | -0.92973745          | 1.9124476            | -2.8615243           | -1.0994081          |
| C24 H32 P4                            | 1.8123741            | -1.301545            | 1.7106473            | -0.26638404         |
| C15 H16 N4 O S                        | 4.0190306            | -0.18727013          | -0.4369481           | 0.92323244          |
| C29 H56 N O6 P S2                     | 3.0225453            | 1.2527548            | 1.4698542            | 0.17661786          |
| C15 H24 N3 O6 P S                     | -0.92706263          | 1.2087747            | -3.0098312           | -0.86906993         |
| C12 H12 N8 O4                         | 1.8308519            | -1.4556342           | 1.4812152            | 1.4511546           |
| GIBBERELLIC ACID [ISTD] (CAS# 77-06-5 | 1.0058311            | -3.2212076           | -2.4889061           | -0.08095016         |
| C20 H32 N4                            | 3.7030432            | -0.21990117          | -0.115389            | 0.22820032          |
| HIPPURATE (CAS# 495-69-2); (M-H)-     | 2.578053             | 0.043289166          | 1.1036228            | -0.13798147         |
| C37 H66 N5 P                          | -0.7772212           | 1.591213             | -1.5529191           | -1.6002204          |
| C25 H41 Cl N8                         | -0.2905876           | -2.259796            | 0.34260777           | -2.188624           |
| C7 H6 O3                              | 3.4381456            | 0.9383171            | -1.1108991           | 0.594332            |
| C22 H44 N2 O5                         | 0.75823164           | -0.9092341           | 0.02325246           | -0.0065415          |
| MONO-METHYL GLUTARATE (CAS# 150       | 2.419259             | -0.6695772           | 0.50572807           | 0.56806314          |
| C22 H36 S4                            | 1.5887928            | -1.4847605           | -0.0664134           | 0.6027702           |
| C24 H34 N2 O10                        | 0.4074364            | -3.1477866           | -2.720636            | 0.026651137         |
| C14 H28 O2                            | 4.0512524            | 0.015978936          | -0.5914055           | 0.56994045          |
| C4 H6 O5 P2 S                         | 3.7918506            | -0.76373667          | -0.0462595           | -0.23086733         |
| C32 H47 N O5                          | 0.505495             | -0.18132524          | 0.98520195           | 0.24449769          |
| C17 H22 N16 O2 P2                     | -1.5934886           | -0.12986302          | -1.3314605           | -0.17578845         |
| TRANS-ACONITATE (CAS# 4023-65-8); (   | -0.063131884         | -0.09000707          | -0.3875204           | -1.130566           |
| C13 H16 N4 O5 S                       | 0.5985997            | -3.2118018           | -2.5151443           | 0.2367287           |
| C21 H33 N10 P S                       | 0.99420124           | 0.14197636           | -1.5845907           | -0.19097537         |
| C22 H4 N O P                          | 1.9327415            | -0.69347715          | -1.6548119           | -1.3113658          |
| GIBBERELLIC ACID [ISTD] (CAS# 77-06-5 | 1.0980802            | -3.238939            | -2.3603032           | -0.12157878         |
| C18 H34 O5                            | 2.4311311            | 1.5727899            | 0.04336165           | -0.7962984          |
| C18 H34 O3                            | 3.210258             | -1.5054554           | -0.7194229           | 0.1518901           |
| C18 H34 O2                            | 3.5058842            | 2.1514013            | -0.8563204           | 0.26427227          |
| C30 H54 N5 O2 P5                      | 2.2103376            | -0.7401854           | 1.2142252            | -0.78029954         |
| C14 H28 O3                            | 3.9623713            | -0.5031794           | -0.1616907           | 0.9183198           |
| C39 H63 N4 P S                        | 3.390934             | -0.8081601           | -0.7840297           | -1.4692159          |
| C37 H64 O3 P6                         | 0.3696073            | -3.1070383           | -2.7371757           | 0.083024085         |
| C43 H58 S2                            | 3.6217601            | 1.5336953            | -0.2771824           | -0.9206733          |
| C25 H37 N10 O5 P5                     | 3.4917686            | 2.1565747            | -0.7667471           | 0.23969972          |
| C11 H20 N6 O2                         | 1.4133073            | -0.25898582          | -0.7947583           | 1.1698718           |
| NONANOATE (CAS# 112-05-0); (M-H)-     | 3.713996             | -0.057544164         | -0.7762112           | 0.62189233          |
| C13 H3 Cl O5                          | 0.20193994           | -1.0038491           | 2.1526237            | -0.46273297         |
| C42 H67 O4 P S                        | 3.2982993            | -0.96277326          | 0.3290416            | -1.4289362          |
| C25 H32 N8 O7 P4                      | -1.6345241           | -0.8715806           | 0.41710296           | 0.079702854         |
| C21 H33 N8 O P5                       | 3.7924886            | -0.59168315          | -0.7624997           | 1.1111505           |
| ARACHIDIC ACID (CAS# 506-30-9); (M-I  | 2.7490644            | 1.8854482            | -0.0165605           | -0.15968323         |
| ALPHA-LINOLENIC ACID (CAS# 463-40-1   | 3.120159             | 1.7699736            | -0.8595416           | 0.32067752          |
| C29 H27 N2 O P S2                     | 0.61342186           | -2.0879834           | -0.0771603           | 0.74179035          |
| C21 H38 O10 S                         | 2.6914768            | 1.9531014            | -1.2054634           | -0.6889434          |
| C7 H17 N6 P S                         | 1.5546241            | 1.3233477            | -0.1388995           | -0.6787399          |
| C7 H13 N2 O16 P3 S2                   | -3.3772151           | 0.87631255           | -1.2457021           | -0.6442168          |
| C19 H25 N10 O4 P5                     | -0.39484164          | -3.2131643           | -2.5982902           | -0.3138653          |
| C17 H28 O3 S                          | -2.057154            | -0.69228834          | 0.5626809            | 0.33478338          |
| C26 H52 N3 O15 P                      | 2.1156862            | 1.0811914            | -0.9731474           | 0.796536            |
| C30 H49 N5 P2 S3                      | 3.8946476            | 0.73056227           | 0.70663166           | -0.00138259         |
| C36 H66 N2 O8                         | 3.2141187            | -0.61399955          | -1.2351047           | -1.2193938          |
| C13 H19 N5 O4                         | 1.6882055            | -0.859952            | 0.6980978            | -2.056979           |
| C19 H14 N10 O2                        | 0.79187906           | -3.1751187           | -2.612661            | -0.29288295         |
| C24 H43 N9 O S3                       | 3.750796             | 0.24818338           | 0.8689045            | -0.19763571         |
| C12 H16 Cl N O S                      | 2.1394832            | -0.53550774          | 0.8762176            | -0.63629097         |
| C40 H81 N2 O8 P                       | 3.3104303            | -0.9665965           | -0.2425537           | -0.5668733          |
| C31 H34 N2 O7 S                       | 0.092250854          | -3.060744            | -2.827264            | -0.03290175         |
| C35 H65 O6 P S                        | 1.4466879            | 0.84050643           | -0.9304988           | 0.772924            |
| C22 H36 O2                            | -1.6233733           | -2.0178807           | 1.9754666            | 0.044044614         |
| C28 H34 N2 O3 P2                      | 3.8966913            | 1.3725114            | -0.3925817           | -0.22624546         |
| C3 H10 N8                             | 0.17422038           | 0.5921651            | -0.8636341           | -0.61715496         |
| TYROSINE (CAS# 60-18-4); (M-H)-       | 3.3079436            | 1.4343963            | -0.7583767           | 0.83857185          |
| C36 H58 N6 O2                         | 2.7616756            | -0.6067186           | 0.37476555           | -1.8793459          |
| C14 H21 N O3                          | 1.71317              | -1.1780881           | -2.090482            | -0.45148867         |
| C38 H74 O4 S                          | 3.066508             | -0.48545533          | -1.3853773           | -1.2420332          |
| C24 H46 O2                            | 0.7656844            | -0.17989138          | 1.3737085            | -1.9581671          |
| C27 H56 N14 O2                        | 2.538742             | -0.5929662           | -1.1779408           | -2.1322691          |
| C22 H41 N4 O4 P3 S                    | 2.620018             | 2.0211077            | -1.3243718           | -0.51864505         |
| C14 H16 N2 O4                         | 2.8412714            | -1.7695673           | -0.5002058           | 0.9405061           |
| C14 H16 N2 O5                         | 3.5314975            | -0.44335437          | -0.6884661           | 1.538567            |
| N-METHYL-D-ASPARTIC ACID (CAS# 63E    | 1.0561614            | 2.7015269            | -0.414319            | 0.6375896           |
| C33 H54 N4 O2                         | 2.3259845            | 0.58584416           | -0.1141446           | 0.35693613          |
| C34 H62 N6 O2                         | 3.155409             | -0.5506159           | -1.2227318           | -1.2268811          |
| C39 H62 N2 O3 P2                      | 3.619255             | 0.9640521            | -0.255621            | -0.5208039          |
| C7 H19 N2 P S2                        | 3.3880224            | 0.6985952            | -0.4451168           | 1.1222725           |
| ADIPIC ACID (CAS# 124-04-9); (M-H)-   | 2.4179063            | -0.6713635           | 0.49865448           | 0.5665724           |
| C35 H72 O4 S                          | 3.5328774            | 0.68011194           | -0.7610014           | 1.1180565           |
| C22 H31 N7 O2 S                       | 2.1081204            | -0.011154316         | -1.275929            | -1.1619767          |
| C27 H52 N O9 P                        | 3.7665734            | 1.6309956            | -0.1796895           | 0.22046983          |
| C14 H24 N2 S4                         | 1.0630442            | -0.036345974         | -1.5139408           | -1.6104171          |
| C39 H72 O3 S2                         | 3.4520326            | -1.467714            | -1.1309358           | 0.8221662           |
| C35 H40 N14                           | 2.0524268            | 0.9100673            | 0.52853495           | -0.30337912         |
| C4 H9 N2 O4 P3 S2                     | -1.4655524           | -1.5657094           | 0.34255823           | -0.8032466          |
| C8 H12 O18 P2 S3                      | -2.3828537           | 1.5507087            | -2.366351            | -1.4152783          |
| C10 H11 N5                            | -1.160206            | -2.7703087           | -2.2253184           | 0.002753452         |
| C18 H29 N18 O6 P5                     | -2.3603373           | 0.24317744           | 1.987346             | -0.02282703         |
| C15 H16 N10                           | 1.7932631            | -2.7870238           | -1.3740647           | -0.2904178          |
| C9 H6 N2 O4                           | -0.40429837          | -1.08007             | -3.3660383           | -0.960863           |
| INOSINE (CAS# 58-63-9); (M-H)-        | 3.312049             | 1.5381843            | -0.2848225           | 1.223047            |
| RAFFINOSE (CAS# 512-69-6); (M+Cl)-    | 1.5410714            | -1.5252476           | -1.8942109           | 1.4105259           |
| C4 H5 N2 P S2                         | -3.38803             | -0.947048            | -0.5761885           | -1.5692719          |
| TAURINE (CAS# 107-35-7); (M-H)-       | -1.3256805           | 1.4057695            | -2.1792696           | -1.5083607          |
| C12 H3 Cl N3 P                        | 2.8617544            | 2.480801             | -0.9136158           | 0.6776125           |
| C16 H32 O3                            | 2.341294             | 2.019011             | -0.56868             | -2.0704517          |
| C16 H32 O2                            | 3.4215047            | 1.2424207            | -1.0639547           | 0.61866635          |
| C32 H58 N8 O3 S2                      | 2.5920272            | 0.61159617           | 0.5561951            | 0.44993293          |

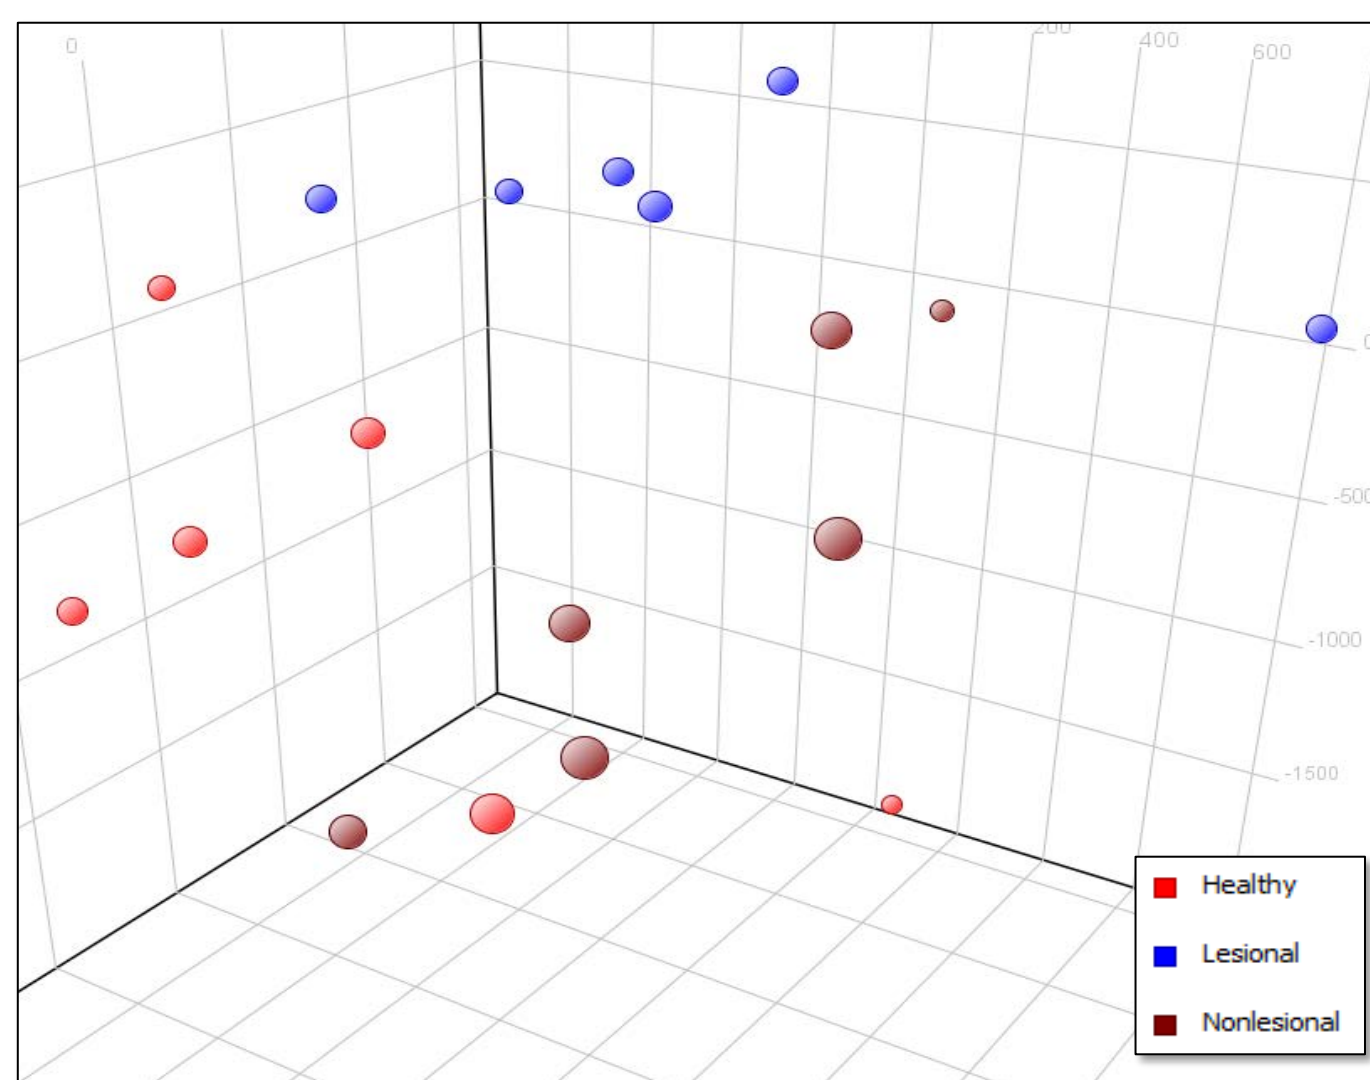

|                                       |             |             |            |             |
|---------------------------------------|-------------|-------------|------------|-------------|
| C30 H62 N2 O S2                       | 1.4841837   | -1.0146921  | 0.94445795 | -0.8610599  |
| C40 H81 N O S2                        | 2.3520603   | -0.53475493 | 1.189105   | -2.1844563  |
| C9 H7 N O                             | 2.6607933   | -0.9859595  | -1.1817598 | 1.2246265   |
| C14 H30 N6 O                          | 3.3765576   | -1.2264273  | 0.10243321 | 0.56313     |
| C21 H37 Cl N2 O S2                    | 2.913383    | 1.9156418   | -1.1560256 | 0.031858265 |
| (S)-3-METHYL-2-OXOPENTANOATE (CA'     | 0.8293569   | -0.546312   | -1.3466522 | -0.08401507 |
| C27 H44 O4                            | 0.91097564  | -0.34417686 | -0.0244794 | -0.13850754 |
| C23 H30 N14 O5 P4                     | 3.704626    | 0.5519471   | 0.34191686 | -0.9549707  |
| C16 H30 O2                            | 3.719545    | 1.3309802   | -0.7585695 | -0.57175314 |
| C16 H30 O3                            | 3.8103757   | -0.50589585 | -0.4839931 | 0.8199588   |
| C9 H20 N8 P2 S                        | 3.1409533   | 1.8408121   | -0.705718  | -0.92130804 |
| C25 H54 N O3 P                        | 2.526528    | -1.1226091  | 2.1982343  | -0.34491444 |
| C33 H66 Cl2 O P4                      | 1.1489449   | -3.127005   | -2.446939  | 0.020296767 |
| C26 H37 N15                           | 0.8160888   | -3.3446915  | -2.1694095 | 0.36943743  |
| 2-HYDROXY-3-METHYLBUTYRIC ACID (C     | 1.4282265   | -0.64203316 | 1.3250433  | 0.13864112  |
| C3 H4 O3                              | 0.1579335   | 0.25180387  | -0.7404964 | -1.9176064  |
| C28 H48 N6 O3                         | -0.09723484 | 0.40477496  | -0.1437611 | -0.8214557  |
| C15-7,10,13,16-DOCOSATETRAENOIC AC    | 0.22896072  | 0.5437459   | 0.2758357  | -1.5564929  |
| CORTISONE (CAS# 53-06-5); (M+Cl)-     | 0.5878697   | -0.53088266 | 0.82031393 | 0.031952314 |
| HEXACOSANOIC ACID (CAS# 506-46-7);    | 2.3904262   | -1.7741133  | 1.2861439  | 1.333958    |
| C20 H35 N6 O2 P3                      | 3.4919193   | -1.0175602  | -0.7636405 | -0.9831668  |
| C4 H11 O3 P                           | 3.53538     | -0.99550796 | -0.1850097 | 0.9267955   |
| C5 H9 N2 O8 P3                        | -1.501835   | -0.59479266 | 1.1665821  | 1.8038409   |
| C27 H55 N3 O3 S3                      | 3.7549648   | 0.9672518   | 0.6376006  | -0.39162666 |
| DECANOATE (CAS# 334-48-5); (M-H)-     | 3.8263764   | -2.31E-04   | -0.5445048 | 0.89187866  |
| C42 H73 N3 O6 S                       | 1.5879736   | -0.70844394 | 2.5888605  | -0.21934797 |
| C30 H25 N5                            | 1.8005502   | -0.60395646 | 0.12221614 | 1.2449884   |
| C21 H28 N4 O S                        | 0.93579507  | 2.9799573   | -1.6843774 | 1.096765    |
| C4 H6 N6 O3                           | 1.7632349   | -0.30076504 | 2.278101   | -0.8077934  |
| C25 H44 N6 O2 P6                      | -0.26472506 | -2.9542158  | -2.9324129 | -0.06325959 |
| C30 H24 N4 O4                         | 1.655281    | -1.3104218  | 0.07575839 | 1.6141992   |
| STEARATE (CAS# 57-11-4); (M-H)-       | 2.851809    | 2.4501305   | -1.2121315 | -0.22614473 |
| C15-VACCENIC ACID (CAS# 506-17-2); (I | 3.4853206   | 2.1812465   | -0.8498932 | 0.28669488  |
| C22 H36 N12 O2 P6                     | -1.6753566  | -0.06280492 | -1.2112929 | 0.17672767  |
| C27 H42 N4                            | 1.3681483   | -0.64953107 | 0.61222535 | -0.44547015 |
| C24 H36 N2 O3 S2                      | 3.635725    | 1.072366    | -0.6090415 | -0.03460401 |
| C20 H37 N6 O2 P3                      | 3.6465127   | 1.9149685   | -0.8286618 | 0.30867976  |
| C29 H27 N19 O4                        | 3.40783     | 1.129934    | 0.42969126 | 1.1193892   |
| C20 H36 O2                            | 2.9432857   | -0.36004472 | -1.1008431 | -2.1649146  |
| C13 H33 N4 O4 P                       | 2.8650622   | 2.0726104   | -1.0416964 | -1.5095527  |
| C38 H41 N10 P                         | 1.1857443   | -3.1511528  | -2.3273733 | 0.06616692  |
| C19 H38 O2                            | 1.6506495   | 0.44070697  | -1.1866575 | 0.789964    |
| C21 H32 N6 O2                         | 2.8791094   | -0.593817   | -0.5525306 | -1.5725065  |
| C21 H34 O P4                          | 3.9794753   | -0.94212157 | -0.3210028 | 0.08534205  |
| C18 H32 N4 O14                        | 3.7076864   | 1.4110563   | -1.0303473 | 0.40562642  |
| C18 H14 N6                            | 2.2030454   | -1.2757623  | 1.2587644  | -0.6158397  |
| C32 H61 N4 O2 P S                     | 3.7081006   | 1.4597007   | -0.907773  | 0.5140908   |
| C20 H31 N2 O5 P                       | 3.8143816   | 1.4702915   | -0.3543562 | -0.21769905 |
| C38 H67 Cl N2 O S2                    | 3.2635012   | 1.2347413   | -0.2668583 | -0.4455006  |
| OMEGA-HYDROXYDODECANOIC ACID (        | 3.031791    | -1.151649   | -0.3892591 | 1.5920932   |
| C30 H50 N5 O5 P                       | 1.2536291   | -1.0415692  | 1.3123523  | 0.855168    |
| C22 H40 N5 O3 P                       | 0.042700984 | 0.7143715   | 1.8201442  | -1.5588623  |
| C23 H44 N6 O4 P4 S                    | 2.5783143   | 2.2645752   | -1.4773841 | -0.3458627  |
| C24 H17 N8 O2 P                       | 2.039907    | -2.7334943  | -2.1402333 | -0.27353048 |
| C15-ZEATIN (CAS# 1637-39-4); (M+Cl)-  | 0.20286918  | -3.272086   | -2.5154676 | -0.01273819 |
| THEOPHYLLINE (CAS# 58-55-9); (M-H)-   | 1.2723725   | -0.3037756  | 1.1492589  | -0.13530128 |
| C17 H33 N4 O3 P                       | 3.5093913   | 2.0566516   | -0.6976173 | 0.011594176 |
| C7 H18 N2 O15 P4 S4                   | -2.635144   | 1.3827685   | -2.17821   | -1.3971633  |
| C37 H68 N2 O5 S2                      | 1.2505623   | -0.9210479  | 0.5385776  | -0.08711729 |
| C23 H30 N4 O2 S2                      | 2.732984    | -0.5738247  | 0.7517504  | -2.0386026  |
| C24 H28 N12 O12 S                     | -0.32957038 | -2.9079053  | -3.0004063 | 0.028137684 |
| C28 H40 N5 O3 P                       | 3.044262    | -1.4670407  | 1.6044906  | 0.07432401  |
| C9 H18 N P3                           | 3.3545954   | 2.0054092   | -0.5213807 | 0.75255704  |
| 6-CARBOXYHEXANOATE (CAS# 111-16-(     | 2.3504992   | -1.2541475  | 0.36524892 | -1.1718516  |
| C7 H8 N4 O2                           | 1.2486684   | -0.3242588  | 1.1490769  | -0.09993561 |
| C25 H53 N8 P                          | 0.43068448  | 0.39248794  | 1.6177424  | -0.65711164 |
| THREONINE (CAS# 72-19-5); (M+HCOO     | 1.5264148   | 1.8054847   | -0.7776221 | 1.3122424   |
| C15 H22 O2                            | 0.6691487   | -0.70459366 | -1.3292574 | 1.259264    |
| C46 H52 N8                            | 1.9405904   | 0.11742642  | 0.778339   | -0.20094761 |
| C39 H65 N7 O2 S                       | 3.077156    | 2.4254496   | -1.1079211 | 0.38413584  |
| C23 H42 S4                            | -2.5950065  | -0.99561524 | 0.20681505 | 2.0943227   |
| C15 H22 O6                            | 2.2032728   | -0.5125103  | 0.3895613  | -0.40751135 |
| C32 H60 O6                            | 1.7759151   | -1.0916803  | 1.86531    | 0.5544673   |
| C21 H44 N4 O14 P4 S                   | 2.256039    | 1.8305748   | -0.6791603 | 1.1157196   |
| C40 H73 N3 O6 S                       | 3.312494    | -1.2093858  | 0.7346033  | -0.65418255 |
| C19 H37 O2 P3                         | 3.5478787   | 0.9689776   | -0.2943882 | -1.1358076  |
| C24 H45 O18 P S3                      | 2.1596408   | 1.980759    | -0.8638068 | -0.6741653  |
| C25 H32 N6 O12 S                      | -0.150368   | -2.889363   | -3.0139308 | -0.10045884 |
| C30 H46 N4 O5                         | 0.3558349   | -3.4849102  | -2.3305688 | 0.115295984 |
| C30 H46 N4 O4                         | 0.34837177  | -3.5222702  | -2.2497518 | 0.21642749  |
| C20 H32 O2                            | 3.4890327   | 2.081253    | -0.605688  | 0.116841435 |
| C20 H32 O3                            | 3.814044    | 1.174183    | -0.5146391 | -0.23624462 |
| C39 H60 N P3                          | 1.8248299   | 0.730902    | 0.49468443 | -0.01516896 |
| C6 H13 Cl N6                          | 2.9358647   | -1.7324293  | -0.1347199 | 0.47471267  |
| C32 H56 N2 O P2                       | 3.594326    | 0.12461074  | -0.1236442 | 0.7747612   |
| C20 H34 O3                            | 1.5368146   | -0.76111454 | 1.1044759  | -1.4197406  |
| C20 H18 N4 O2                         | 1.036292    | -3.2435136  | -2.4627433 | -0.13630243 |
| C20 H34 O2                            | 3.7401807   | 1.3774147   | -0.8178405 | 0.036617577 |
| C16 H28 O2                            | 2.4300578   | -1.6624938  | 1.3075216  | 0.5624993   |
| C15-ZEATIN (CAS# 1637-39-4); (M-H)-   | -0.7070261  | -3.1614103  | -2.530493  | 0.071860254 |
| C19 H38 S2                            | 3.289783    | 2.0775814   | -0.3438606 | -0.16357619 |
| C34 H48 Cl N2 O5 P3 S                 | 0.97854424  | -1.4013034  | 0.55938995 | 0.8034208   |
| PALMITOLEIC ACID (CAS# 373-49-9); (M  | 3.7165732   | 1.338217    | -0.7494635 | -0.5641878  |
| C25 H55 N5 O7 S3                      | 3.417593    | -1.081649   | 0.10844592 | -0.88933194 |
| C28 H40 O13 S3                        | 2.0204973   | 2.28743     | -1.1201047 | -0.3064189  |
| C25 H52 N O2 P S3                     | 2.6492991   | -1.383302   | 1.634996   | 0.3250847   |
| C25 H50 O2                            | 2.6635263   | -1.7358779  | 1.5930697  | 0.91085917  |
| C13 H11 N2 O2 P                       | 3.7152472   | 0.16562635  | -0.7098758 | 0.92393595  |
| C24 H48 N O2 P S2                     | 3.5392334   | 1.0227516   | -0.4780303 | 0.8797033   |
| C24 H32 N2 O5                         | 1.5444788   | -1.3958981  | -0.1380949 | 0.90266275  |
| C28 H60 N O4 P S2                     | 2.8824766   | -1.2959429  | 0.97541475 | -0.13035926 |
| C18 H39 Cl N2 O S3                    | 2.7941217   | -1.319227   | -0.7256676 | 0.11255978  |
| C30 H25 N5 O                          | 2.7626681   | 2.278918    | -1.3362062 | 0.7023083   |
| C27 H54 Cl2 O                         | 3.3606534   | 1.1348214   | -0.4089451 | 0.7870387   |
| NORLEUCINE (CAS# 327-57-1); (M-H)-    | 3.1074562   | 1.6119579   | -0.6049011 | 0.87738323  |

|                                      |             |             |            |             |
|--------------------------------------|-------------|-------------|------------|-------------|
| C12 H23 N O3                         | 3.5464206   | 0.54255134  | 0.1253747  | 0.59816384  |
| C30 H57 N O11 P2 S                   | 3.4484432   | -1.1384485  | -0.1026353 | -0.5895779  |
| C23 H34 N6 O13 P2                    | 3.2475667   | 1.9637334   | -0.8489053 | 0.68239945  |
| C14 H16 N12 O P4                     | 3.6012006   | 0.33668166  | -0.8562216 | 0.8193661   |
| 4-METHYL-2-OXOVALERIC ACID (CAS# 8   | 1.3701124   | -1.3107976  | 0.15713114 | 0.53953314  |
| C21 H32 N2 O8                        | 3.6691787   | 1.8182548   | -0.6108466 | 0.05077648  |
| C12 H20 O3                           | 1.4916493   | -2.4258587  | -0.7807425 | -0.64380926 |
| C27 H50 S2                           | 0.027265161 | 2.1255634   | -0.6142513 | -0.93749404 |
| JASMONIC ACID [ISTD] (CAS# 77026-92  | 1.0337055   | -3.222711   | -2.461313  | 0.0937442   |
| C38 H63 Cl N2 O S2                   | 3.1034627   | -1.3606775  | 0.5047741  | -0.9062777  |
| C38 H60 N9 P                         | 0.39621937  | 0.04728974  | -2.0350564 | -1.0493178  |
| C21 H32 N6 O4 P6                     | -0.6297364  | -3.0447516  | -2.7447865 | -0.34536582 |
| C45 H49 N5                           | 1.3359601   | -0.43388432 | 0.55607474 | -0.5231962  |
| C41 H86 O2 P4                        | 2.7064993   | -1.0105758  | 1.5314084  | -0.5215721  |
| C5 H5 N5                             | -1.0442638  | -2.809809   | -2.2870767 | -0.6799174  |
| ISOCITRATE (CAS# 320-77-4); (M-H)-   | 0.38181812  | 0.085661255 | 0.85432106 | -1.8851094  |
| C24 H52 N O2 P S2                    | 1.6815025   | 3.104583    | 0.3525998  | -0.0846703  |
| 16:0 LYSO PC (CAS# 17364-16-8); (M+C | 1.1754956   | -0.82306236 | 0.8630892  | -0.46198684 |
| FRUCTOSE (CAS# 57-48-7); (M+HCOO)-   | -1.7483454  | -1.0286078  | -0.3440309 | -0.7825837  |
| C36 H66 N2 O6 S                      | 0.10926071  | -0.6806238  | -0.849384  | -0.15460533 |
| C24 H53 Cl N4 O3                     | 2.6824045   | 0.4325876   | -0.0322345 | 1.6997216   |
| C27 H53 N2 P3                        | -0.7327864  | -2.255781   | 0.10944522 | -2.2851837  |
| C16 H30 N6 O2                        | 3.6921492   | 1.3269283   | -1.0587572 | 0.18691593  |
| C28 H52 N5 O5 P                      | 2.2971916   | -1.3192241  | 0.6378279  | -0.35019493 |
| C23 H37 O17 P                        | 3.5363266   | 2.0656648   | -0.9258818 | 0.34009314  |
| C38 H35 N5 O4                        | 0.03697662  | -3.5582647  | -1.8922555 | -0.22232944 |
| C30 H51 N O20                        | 2.5930245   | -1.1407356  | 2.048194   | -0.22534454 |
| 18:0 LYSO-PE (CAS# 69747-55-3); (M-H | 0.8764379   | 0.5830433   | 0.18042284 | -1.4519467  |
| C44 H89 N S2                         | 1.4060892   | 0.5654392   | -0.7395543 | -2.4778023  |
| C11 H18 N2 O S2                      | 2.1064625   | 0.43953386  | 0.739927   | 2.3727612   |
| C6 H10 N6 O4                         | 0.8124427   | -0.33666268 | 0.33971232 | -0.7107551  |
| C24 H42 N6 O3                        | 2.5348175   | -1.2040085  | 0.27257788 | -0.4403572  |
| C20 H31 N6 O17 P                     | 0.24646062  | 0.65852267  | 1.2648745  | -0.4488967  |
| C17 H35 O2 P3                        | 4.0586367   | -0.22060023 | -0.5009394 | 0.43281746  |
| C22 H27 N2 O2 P                      | 3.1837027   | 2.4289248   | -0.8510786 | 0.4699991   |
| C17 H30 N6 O3                        | 3.4072723   | -1.4276129  | -0.8027192 | 0.05746436  |
| C23 H47 Cl N3 O3 P                   | 3.7155976   | 1.0140706   | 1.3468578  | 0.2709508   |
| C37 H39 N10 P                        | 1.457898    | -0.97465587 | 1.687628   | -0.20225939 |
| PALMITATE (CAS# 57-10-3); (M-H)-     | 3.409565    | 1.3014966   | -1.1170101 | 0.51619905  |
| CITRATE (CAS# 77-92-9); (M-H)-       | 1.1009512   | -0.38191587 | 1.2377483  | -1.691081   |
| C41 H49 N5                           | 2.1034145   | 1.6016935   | -0.6463052 | 0.73921776  |
| C41 H85 N2 O P3 S                    | 2.6680832   | -0.75017893 | 1.5798554  | -1.6485236  |
| C25 H43 N13 P2                       | 1.7726763   | -0.48039612 | 0.40708098 | -0.45338184 |
| C18 H28 O3 P2                        | 3.717762    | 1.6011992   | -0.8306493 | -0.19623369 |
| C27 H24 N4 O2                        | 3.2630646   | -0.7414855  | -0.6603554 | -1.1576209  |
| C33 H66 N2 O3 S2                     | 3.6392257   | 1.4603213   | -0.1906011 | 0.56961715  |
| C24 H47 N5 O P4                      | 3.3413284   | 0.15712036  | 0.61761326 | 1.3823197   |
| C13 H23 N2 O P S                     | 2.5604386   | -1.1522459  | 0.87240404 | 1.8674617   |
| C22 H28 O3 P2                        | 1.7445078   | -0.44810787 | -0.4193063 | -1.846092   |
| C31 H37 N14 O P S                    | 2.8306284   | -1.2361215  | 1.3905399  | -0.42352778 |
| N-ACETYL-D-GLUCOSAMINE (CAS# 751:    | 3.250693    | -1.3343252  | 0.8074176  | 0.05715704  |
| C43 H76 N O7 P                       | 3.3466568   | -1.0874403  | 0.57109815 | -0.7447499  |
| C40 H60 O12                          | 3.685121    | 1.2169554   | -1.1192889 | 0.48815787  |
| C40 H53 N3 O P4                      | 1.2988068   | -3.1126997  | -2.3418298 | 0.014060214 |
| C16 H22 N6 O3                        | 1.1987021   | -2.708014   | -2.700288  | 0.024933606 |
| C19 H32 N2 O7 S                      | 1.1526926   | 0.51996934  | 0.55316526 | -1.6483523  |
| C14 H18 O4                           | -1.0870042  | -0.15485182 | -1.0247387 | 0.53115124  |
| C38 H75 N S2                         | 2.246279    | -1.2620568  | 2.4398842  | -0.06092113 |
| C14 H23 N6 O9 P3 S                   | -0.6788783  | -2.5800512  | -3.1268997 | -0.14829071 |
| C27 H50 O5                           | 2.9781938   | 1.3970494   | -1.2595171 | 0.6880472   |
| C22 H24 N4 O4                        | -1.6620399  | 0.5955553   | -0.729501  | -0.68915766 |
| C40 H46 O2                           | 0.8296883   | -0.99383605 | -0.2034265 | 0.12929562  |
| C17 H22 N12 O P4                     | 3.8376005   | 0.018000469 | -0.484156  | 0.9344889   |
| C21 H30 N6 O2                        | 2.2802463   | -0.50860614 | -0.2073181 | -0.7710577  |
| C19 H34 N2 O8                        | 3.760679    | 1.5813833   | -1.0473399 | 0.01907432  |
| C25 H30 N O2 P5                      | 2.4026186   | -1.9759957  | 0.31054553 | 1.4184126   |
| C41 H81 N3 O2 S3                     | 3.2745163   | -1.0822963  | 0.7653883  | -0.9762685  |
| C16 H23 N2 O11 P S                   | -0.7067021  | -2.7605805  | -2.937767  | -0.40379953 |
| LEUCINE (CAS# 328-39-2); (M-H)-      | 3.1066442   | 1.6126277   | -0.6016468 | 0.87596345  |
| C17 H32 N2 O8                        | 3.7661042   | 1.4859433   | -0.8822087 | 0.46029252  |
| C20 H30 N6 O P4                      | 3.7709832   | -1.0209887  | -0.4887231 | 0.52535343  |
| C25 H55 N3 O3 S3                     | 3.7494047   | 1.2618929   | 0.9016088  | 0.72121805  |
| C15 H33 Cl N4 O2                     | 2.831256    | 1.6335255   | -0.9966699 | 0.66464746  |
| C18 H17 N5 O4 P2                     | 2.560046    | -0.96252596 | 0.8673842  | -0.7051033  |
| C25 H44 N O7 P                       | 3.790293    | 1.2990066   | -0.4690138 | 0.7539482   |
| C21 H18 N4 O                         | 3.6172526   | 1.1293712   | -1.1288052 | 0.37536603  |
| C27 H48 N11 O5 P                     | 1.6749709   | -0.5411687  | 0.35890982 | -1.0445685  |
| C33 H37 N6 O2 P                      | -1.3845438  | -2.9789665  | -2.343764  | 0.2664119   |
| C29 H50 N10                          | 1.8131636   | 0.5283048   | 0.50647944 | 0.5481857   |
| C25 H54 N O4 P S2                    | 1.7807138   | -0.06817525 | 0.60868824 | -1.098634   |
| C23 H36 O2 S2                        | 2.580976    | -1.0580634  | 0.80544907 | -0.17015909 |
| C18 H21 N2 O2 P                      | 3.9793587   | 0.42163143  | -0.7737009 | 0.6789172   |
| C22 H26 N4 O22                       | 3.853345    | -0.5423416  | -0.6746281 | 0.98620844  |
| C36 H41 N7 O P4                      | 2.7003832   | -1.2161716  | 0.9079495  | -0.5840627  |
| C12 H27 N4 O P3 S                    | 2.2884538   | -0.2632875  | -0.3127269 | 1.4756835   |
| C36 H73 Cl P4                        | 1.9356978   | -1.1869895  | 0.9830562  | 0.31452078  |
| GAMMA-BUTYROLACTONE (CAS# 96-48      | 1.0576098   | -1.1977632  | 1.2588191  | -0.36957172 |
| C24 H40 N12 O2 P6                    | -0.27122924 | -3.0132384  | -2.8782809 | 0.015432298 |
| C14 H23 O5 P S                       | 2.034697    | -0.73827505 | 0.1781825  | -2.0357425  |
| C21 H34 N2 O5 S2                     | 3.1565375   | -0.8185085  | -1.1943027 | -1.6301088  |
| C42 H70 O3 S3                        | 3.601084    | 1.3446983   | -0.4273756 | -0.22445488 |
| C8 H15 N3 P2 S                       | 1.3739945   | 1.1303586   | 0.49845022 | 0.25080794  |
| C31 H46 N4 O                         | 0.6655543   | 0.07088973  | 1.7127196  | -0.07789502 |
| C23 H9 Cl N6 O                       | 2.5217447   | -0.7834819  | 1.027835   | -1.1228278  |
| C23 H35 O17 P                        | 3.1389656   | 1.3886577   | -1.6017126 | 0.34155616  |
| C28 H44 Cl N10 P S3                  | 1.7314899   | -0.97991836 | 0.7632207  | -1.0449737  |
| C9 H16 O3                            | 3.5278902   | 0.11244121  | -0.7953836 | 0.9232291   |
| C9 H16 O4                            | 3.3608813   | 0.3731517   | 0.1017355  | -0.74763614 |
| C15 H37 N4 O3 P                      | 2.8319275   | 2.6959352   | -1.0829933 | -0.20899075 |
| C18 H36 O4                           | 4.046763    | -0.2163691  | -0.1908996 | 0.93795896  |
| C9 H10 S                             | 1.6791749   | 0.03262232  | -1.5038557 | -2.166298   |
| L-HISTIDINE (CAS# 71-00-1); (M-H)-   | 2.0608287   | 0.17035915  | -1.3531611 | 0.87586004  |
| C28 H45 Cl N2                        | 0.8072225   | 0.3335198   | 0.7051339  | -1.0790335  |
| C22 H44 O2                           | 2.5572004   | -1.3755487  | 1.034811   | -0.07296276 |
| C26 H32 O7 S2                        | 3.6285183   | 1.3775616   | -0.7630542 | -1.0208445  |

|                                       |              |             |            |             |
|---------------------------------------|--------------|-------------|------------|-------------|
| C22 H37 O12 P S2                      | 3.8448687    | 0.9523599   | -0.5180157 | -0.7546875  |
| C38 H77 N S2                          | 2.171835     | -0.32506546 | 1.7388464  | -2.3826504  |
| C24 H38 N2 O17 P2                     | 3.326412     | -0.88837045 | -1.2086582 | -1.0067879  |
| C25 H50 N2 S3                         | 1.7473149    | 1.7303023   | -0.7045281 | -1.4761419  |
| C18 H36 O3                            | 3.4306836    | -0.9643167  | -0.8734599 | 0.7354002   |
| C18 H36 O2                            | 2.8333426    | 2.4644094   | -1.2066383 | -0.22815907 |
| C32 H33 N6 O2 P S3                    | 0.7976215    | -0.73487884 | -0.3589178 | -0.4682654  |
| SALICYLATE (CAS# 69-72-7); (M-H)-     | 3.4316702    | 0.9298079   | -1.1106184 | 0.6082854   |
| C42 H45 O P S                         | -1.0327206   | -3.3679438  | -1.738177  | -0.35905668 |
| C31 H58 N O6 P S2                     | 2.8505194    | 1.5790272   | -0.576264  | -0.5145596  |
| C7 H17 N2 O P S4                      | 3.7971897    | -0.84160835 | -0.1318689 | -0.19800079 |
| C26 H54 N O4 P S2                     | 2.6831238    | 2.4159212   | -0.2572164 | -1.2216475  |
| C16 H18 N4 O4                         | 2.1023233    | -1.7773418  | -0.0679664 | 0.8930594   |
| C11 H19 N7 O                          | 3.6423483    | 0.6030676   | -0.2923747 | 0.3430724   |
| C17 H33 N8 O P                        | 1.7370024    | -0.5924697  | -0.6978442 | 0.2601606   |
| C30 H55 N5 O3 P4                      | 3.5908785    | 0.55290246  | 0.96210223 | 0.1947816   |
| C27 H36 N2 O P2                       | 2.1326747    | 1.1108801   | 0.3090402  | 1.2703936   |
| LINOLEATE (CAS# 60-33-3); (M-H)-      | 3.6804283    | 1.7933507   | -0.9496396 | 0.1570375   |
| C25 H38 N6 O6 P2 S2                   | 3.7146955    | 1.7717372   | -0.6342154 | 0.16445631  |
| C8 H8 O3                              | 2.9069157    | -0.06686228 | 1.5801721  | 1.5251259   |
| C18 H30 O2                            | 2.5465276    | 1.3231596   | 1.1229095  | -0.04361486 |
| SEBACIC ACID (CAS# 111-20-6); (M-H)-  | 3.533088     | -0.08678086 | 0.7003573  | -0.45462555 |
| CORTISOL (CAS# 50-23-7); (M+Cl)-      | 0.10637342   | -0.44776988 | 0.03187737 | -0.2199469  |
| C20 H24 N4 O4                         | 3.2439263    | -1.0052493  | -0.9200591 | -1.5898728  |
| C28 H18 N9 O3 P                       | 3.0697784    | -1.2262706  | -0.3899091 | 1.3591906   |
| C40 H67 O4 P S                        | 2.7267241    | -0.89565015 | -0.7374877 | -0.29563522 |
| C14 H26 O2                            | 2.9657478    | -1.8219793  | 0.4971508  | -0.1449818  |
| ERUCIC ACID (CAS# 112-86-7); (M-H)-   | 2.5498745    | 0.14765662  | -1.2154626 | -2.0839822  |
| C40 H75 N3 O6 S                       | 2.379355     | -1.3324283  | 1.9671897  | 0.4744169   |
| C24 H38 O13 P2                        | 3.6954956    | 1.4192429   | -0.9678755 | 0.2638595   |
| C22 H27 N O2 P2                       | 2.7407656    | -0.8380943  | 0.1258824  | -2.0632246  |
| C17 H32 O2 S                          | 0.8722237    | -0.65351427 | -0.4437047 | -0.7914893  |
| N-ACETYL-L-ALANINE (CAS# 97-69-8); (  | 2.621952     | -0.47600827 | -1.2251575 | -0.9489778  |
| C20 H25 N2 O2 P                       | 2.035766     | 0.35674262  | -0.6286541 | 2.3025818   |
| C41 H79 N3 O2 S3                      | 2.5788186    | -1.0071554  | 0.4415384  | 0.028471291 |
| C29 H45 Cl N4 O2                      | 0.37140316   | -3.5069811  | -2.2382216 | 0.1265429   |
| C20 H20 N4 O2                         | 0.7309934    | -3.2511082  | -2.5673528 | -0.14060245 |
| C7 H8 N2 O17 P2                       | 0.32907432   | -1.3326886  | 2.1678746  | 2.104276    |
| C17 H18 N4 O S                        | 2.119394     | -1.9407248  | 1.0042653  | 0.897944    |
| C22 H34 O2                            | 3.063731     | -0.9382711  | -0.8530227 | -0.8314271  |
| C30 H44 N4 O4                         | -0.10122151  | -3.4934669  | -1.9406707 | -0.0265947  |
| C19 H23 N8 O2 P5                      | -0.6327772   | -2.952313   | -2.7893555 | -0.12693247 |
| C13 H12 N10                           | 2.5742514    | -0.97395897 | -1.1195018 | 1.1273559   |
| C16 H34 O8 S                          | 0.7718238    | 0.84690976  | -0.2178336 | 1.0824146   |
| C13 H22 O3                            | 1.3009517    | -0.5433161  | 1.1529453  | -0.23456609 |
| C24 H37 N2 O10 P S                    | 3.359965     | -0.87708175 | -0.8725434 | -1.13799    |
| C21 H19 N18 O P                       | 3.6263556    | 0.33459386  | -0.9116963 | -0.64007026 |
| C22 H23 O3 P S2                       | 2.495882     | -1.0464488  | 0.7372278  | -0.7334566  |
| PHENYL ACETATE (CAS# 122-79-2); (M-   | 1.4072857    | -0.79816365 | 2.0515046  | -0.9709769  |
| C24 H37 O4 P3                         | 2.6772509    | 1.480058    | 0.28468704 | -0.03234094 |
| C19 H21 Cl N2 O10                     | 0.32833755   | -3.142314   | -2.655311  | -0.37701213 |
| C29 H50 N11 O2 P5                     | 1.930201     | -1.2935929  | 1.9771192  | 0.37853146  |
| 3BETA-HYDROXYANDROST-5-EN-17-ON       | 2.4430382    | -1.2967331  | 2.2109394  | -0.25175512 |
| C12 H24 O2                            | 3.974087     | -0.5019561  | -0.3570074 | 0.80302536  |
| C9 H13 O12 P3 S2                      | -3.175796    | 1.2543504   | -1.6695951 | -1.1052175  |
| ZEATIN [ISTD] (CAS# 13114-27-7); (M+H | 0.20286918   | -3.272086   | -2.5154676 | -0.01273819 |
| PARAXANTHINE (CAS# 611-59-6); (M-H    | 1.2608191    | -0.32040042 | 1.1835358  | -0.10354349 |
| C28 H58 N O4 P S2                     | 3.4443297    | 2.2491355   | -0.2692643 | -0.29860216 |
| C9 H9 N O3                            | 2.4807858    | 0.01477871  | 1.2785048  | -0.33109874 |
| C8 H12 O3 S                           | 1.052969     | -0.7391399  | 1.0699708  | -0.8408328  |
| C33 H62 N4 O14                        | 3.6413581    | 1.3935821   | -1.0155566 | 0.6514591   |
| C24 H49 Cl N8                         | 0.21830565   | 0.042069085 | 0.5941077  | 0.21190247  |
| C36 H75 N S2                          | 0.9152937    | -0.41524002 | 1.7895601  | -1.3882234  |
| TRIDECANOIC ACID (CAS# 638-53-9); (I  | 3.325826     | -0.3396195  | -0.9473757 | 1.7814878   |
| C34 H55 N4 O4 P                       | 2.6525445    | -0.6638069  | -0.2829176 | -1.8939202  |
| C22 H32 N2 O9 P2 S                    | 3.8213835    | -0.72762007 | -0.8252152 | 0.8561713   |
| C20 H34 N4 O14                        | 3.9874988    | 0.55591154  | -0.9863695 | -0.36967182 |
| C20 H32 N4 O14                        | 3.4288023    | 1.634494    | 0.03366555 | 0.45358604  |
| C12 H14 O4                            | 1.7246138    | -1.6128573  | -1.320165  | 1.641927    |
| C37 H42 N5 O2 P3 S                    | 2.8022904    | -1.2044611  | 1.3255963  | -0.52453977 |
| C37 H70 O S2                          | 2.4943686    | 0.3777734   | -0.5956213 | 0.057405174 |
| C25 H43 N12 P                         | 0.5869588    | -3.0919428  | -2.7194328 | -0.29250363 |
| MYRISTIC ACID (CAS# 544-63-8); (M-H)  | 4.061348     | 0.03934497  | -0.5863788 | 0.52963066  |
| C34 H47 N3 O10                        | 3.934258     | 0.909782    | -0.312752  | -0.18639392 |
| C22 H32 O2                            | 3.035309     | 2.1832705   | -0.0920031 | 0.1766147   |
| C20 H36 N4 O14                        | 2.4437811    | 2.0470617   | -1.6057265 | -0.37031895 |
| C17 H18 N10 O                         | 1.1589463    | 0.07030318  | 0.5199001  | -0.31578863 |
| C7 H8 O4 S                            | 2.863937     | -0.35518822 | -0.0558741 | 0.88290095  |
| C35 H69 O6 P S                        | 3.397897     | -1.5082041  | -0.9714402 | -0.5487814  |
| C6 H10 N8 O4                          | 1.8153322    | 0.16274229  | -0.7493281 | -2.6197386  |
| C17 H25 Cl N10 O4 S                   | -2.7806265   | -0.7523675  | -2.1888452 | -0.03606063 |
| C26 H28 N4 O4                         | 2.3552027    | -1.9664563  | -0.0328763 | 0.9012042   |
| C36 H37 N O3                          | 2.2204313    | -1.6031469  | 1.6929158  | 0.43990788  |
| C41 H54 O6 P2 S                       | 0.19817725   | -2.9855335  | -2.863192  | -0.00352703 |
| C11 H20 Cl P3                         | 3.6754901    | 1.531334    | -0.4811886 | 0.5996988   |
| C28 H55 N3 P2 S                       | 0.8994508    | -0.5450927  | 1.7920347  | -0.30142087 |
| C21 H44 O4 S                          | -1.4678596   | 1.730013    | -0.398025  | -1.0723673  |
| C19 H36 O2                            | 2.8013997    | 1.6014577   | -1.1258061 | -0.68121815 |
| C18 H19 N14 O2 P5                     | -0.5171308   | -3.0587204  | -2.7254045 | -0.14165516 |
| C26 H38 O13 P2                        | 3.467871     | -1.0810957  | -0.8644701 | -0.83504784 |
| CORTISONE (CAS# 53-06-5); (M+HCOO     | 3.3211572    | -1.395321   | 0.9362683  | -0.30172426 |
| C12 H14 N8 O9                         | -0.51596963  | -3.0664237  | -2.7156696 | -0.02670714 |
| C21 H37 N25 P2                        | 1.5473472    | -0.50880307 | -1.3102033 | 0.1471081   |
| PALMITIC ACID-13,13,14,14,15,15,16,16 | -2.1378474   | 1.2064911   | -1.6726458 | -1.3952223  |
| C28 H46 N O2 P3                       | 2.1123307    | 0.34656715  | -1.0315899 | -1.5515792  |
| C18 H41 O P3                          | 3.3035007    | -1.5061731  | -0.0550039 | -0.02613968 |
| C22 H52 N15 O4 P5                     | 1.2192695    | 0.73862374  | -1.0361838 | 0.3207518   |
| C28 H26 N3 O2 P                       | -0.035326008 | 0.3660817   | 0.5803658  | 0.69487345  |
| C37 H77 N3 O S                        | -1.8276712   | 0.087711826 | -1.9940717 | -0.8296207  |
| C27 H54 N7 O2 P3 S                    | 2.6525898    | -1.1472086  | 1.9587625  | 0.43014994  |
| C21 H26 N4 O3                         | 1.3250692    | 2.971161    | -1.9683952 | 1.3344126   |
| C23 H37 O2 P3                         | 0.23467083   | -0.24746574 | -1.9643289 | 1.0991945   |
| C19 H18 N8 O12                        | -0.56511086  | -3.1274323  | -2.725172  | -0.32100126 |
| C15 H25 O4 P3                         | 2.468978     | -1.0042496  | 1.3834343  | -1.6092732  |
| CIS-7,10,13,16-DOCOSATETRAENOIC AC    | 2.889534     | -0.31419215 | -0.6770673 | -2.0570302  |

|                                      |              |             |            |             |
|--------------------------------------|--------------|-------------|------------|-------------|
| C18 H30 Cl2 N4 O2                    | 3.4756439    | 1.7754647   | -0.1897736 | 0.47850108  |
| C13 H31 N4 O3 P                      | 3.667106     | 1.1255356   | -0.7132405 | -0.63466763 |
| C33 H36 N20 O2                       | 3.7372458    | -0.2529986  | -0.2093749 | 1.1506383   |
| C26 H40 N5 O3 P                      | 3.8021793    | 0.72663695  | 0.8746367  | -0.09376144 |
| C5 H9 N O4                           | 0.99375045   | 2.8421013   | -0.2125269 | 0.48180848  |
| C46 H56 N4 O2                        | 2.4011755    | -0.27577722 | -0.0289    | -0.11332989 |
| C31 H52 N8 O P2                      | 3.750762     | -0.26345047 | -0.6762937 | 0.38439202  |
| AZELAIC ACID (CAS# 123-99-9); (M-H)- | 3.355292     | 0.3459315   | 0.09011759 | -0.7245267  |
| C13 H7 P S3                          | -1.3836331   | -1.7335659  | 1.1733828  | -1.1313701  |
| C11 H17 O20 P3 S4                    | -2.095481    | 0.85033286  | -1.5406748 | -0.86989605 |
| C15 H15 N7 O5                        | 3.5025144    | 0.63702744  | -1.073572  | 1.466088    |
| C20 H42 O4 S                         | 0.12150717   | -0.5220503  | -0.8895018 | 0.6785589   |
| C30 H22 N2                           | 0.614013     | -0.4433789  | 0.56060046 | -0.8656523  |
| ISOLEUCINE (CAS# 73-32-5); (M-H)-    | 3.1071718    | 1.6138431   | -0.6052561 | 0.8735872   |
| C22 H40 N4 S                         | -0.64980495  | 1.013062    | -0.5578651 | -0.3966015  |
| C9 H11 N O3                          | 3.215127     | 1.3847541   | -0.7273995 | 0.8029957   |
| C30 H55 N3 O P2 S                    | 1.3959979    | 2.3241475   | -0.2044255 | 0.5237831   |
| C35 H74 N2 O S2                      | 2.5605974    | 1.62783     | -0.3807263 | 1.3512824   |
| XANTHINE (CAS# 69-89-6); (M-H)-      | 1.9014394    | 3.0741184   | -0.6882891 | -0.89192086 |
| C21 H40 N6 O2 P6                     | 3.110516     | -0.2637014  | -1.1113899 | -0.94960713 |
| C26 H55 N9 O P6                      | 2.0074594    | -0.48704553 | 0.93161136 | -0.37967473 |
| C22 H43 N3 O6 S                      | 3.8643928    | 0.09919566  | 0.22983769 | 0.045584857 |
| C36 H61 N O2 P6                      | 3.1882734    | -1.1411538  | -0.4117286 | -0.7233567  |
| C39 H61 N7 O2 S                      | 2.6770296    | -0.8002422  | -0.3344834 | -1.2005894  |
| C28 H33 N2 O9 P                      | -5.29E-04    | -2.92461    | -2.965708  | -0.00770903 |
| C37 H33 N S4                         | 2.6781979    | -1.5317264  | 0.67848843 | -0.17561162 |
| C4 H4 N3 P                           | -1.3445768   | 1.5203315   | -2.4798577 | -1.2372367  |
| C17 H26 O3                           | 0.08987504   | -3.0676463  | -2.5466535 | 0.5521173   |
| C30 H56 S2                           | 1.8445537    | -1.5837026  | 1.6856265  | 1.5403639   |
| C10 H12 N4 O5                        | 3.4800189    | 1.0428815   | -0.0963768 | 1.263454    |
| 2-METHYLGULUTARIC ACID (CAS# 18069   | 2.4212155    | -0.67692065 | 0.5115098  | 0.5680899   |
| C17 H24 N2 O6 P4                     | -0.53520435  | -2.6456735  | -3.0863352 | 0.16705349  |
| 3-METHYLADIPIC ACID (CAS# 3058-01-3  | 2.3504992    | -1.2541475  | 0.36524892 | -1.1718516  |
| C25 H48 O4                           | 1.434623     | -0.44242    | -0.7908446 | 2.1047585   |
| C17 H26 O4                           | 2.4930146    | -0.8900513  | -1.486722  | 0.93652093  |
| C17 H26 O5                           | -0.27160066  | -0.19840439 | -0.206765  | 2.3408132   |
| C22 H38 O P2 S                       | 3.6315572    | 1.8118348   | -0.9973564 | 0.20497274  |
| C26 H43 N O5                         | 2.6748214    | -1.8861696  | 1.0133362  | 0.7068163   |
| C34 H65 O2 P3                        | 3.286037     | 0.22739269  | -0.3220813 | -1.269714   |
| C15 H24 N5 O3 P3                     | -2.9971611   | 0.004820951 | -1.8370366 | -1.2709895  |
| C11 H14 O3                           | -1.6471661   | 0.76250225  | -0.7105689 | -0.16732228 |
| C23 H39 O17 P                        | 2.7684176    | 2.1083236   | -1.4630138 | -0.3469332  |
| C13 H20 O4                           | 2.8586535    | -0.7912092  | -1.1466027 | 1.2155452   |
| HYDROXYCHOLATE (CAS# 83-49-8); (I    | -1.5494032   | 1.2732561   | -0.2161899 | -0.2548074  |
| C13 H20 O2                           | 1.5344212    | 1.3787931   | 0.8080458  | 0.80507696  |
| 4-ACETAMINOPHEN SULFATE (CAS# 32     | 0.3415798    | -0.4974979  | 0.25648344 | 0.42915717  |
| C30 H48 N O2 P3                      | 1.0902323    | 0.7681915   | 0.4522329  | -1.9691664  |
| C32 H45 N18 O P                      | 1.3929846    | -0.58448505 | 1.9793853  | -0.8085704  |
| C36 H25 N2 P S                       | 2.8152518    | -1.2642707  | 1.2941458  | -0.48544568 |
| C36 H67 N2 O P                       | 4.0541997    | 0.60605097  | -0.386574  | 0.16400504  |
| C19 H23 N2 O2 P                      | 3.8746204    | 0.7064514   | -1.0880764 | 0.17000204  |
| C32 H59 Cl N2 O                      | 1.3136775    | 0.43004563  | 0.68084234 | 0.23311332  |
| C19 H39 Cl S4                        | 2.1308088    | -1.579658   | 1.6131147  | 0.52305764  |
| C18 H14 N10 O                        | 0.9201748    | -3.275366   | -2.0141146 | 0.16272521  |
| C5 H5 Cl N2 S                        | 0.9018183    | -1.5395628  | 2.014718   | -0.48979065 |
| C35 H67 Cl2 O3 P                     | -0.025669038 | 0.8381995   | -0.4008457 | -2.149218   |
| URIDINE (CAS# 58-96-8); (M+HCOO)-    | 3.7365224    | 1.5239342   | -0.6787088 | 0.8708929   |
| TRICOSANOIC ACID (CAS# 2433-96-7);   | 2.6751635    | -1.6714766  | 1.3362083  | 0.5478935   |
| N-ACETYL-D-MANNOSAMINE (CAS# 36      | 3.248344     | -1.3353956  | 0.8054964  | 0.052756608 |
| C15 H31 N4 P S2                      | 2.703464     | -0.76666826 | -1.175348  | 1.0019526   |
| C22 H26 Cl N4 O5 P                   | 1.400896     | -1.4184406  | 1.4977654  | 1.2515374   |
| C17 H34 O2                           | 3.2050726    | 0.42082414  | -0.0252709 | 0.5235112   |
| C26 H28 N6 O P2                      | 3.3374093    | 2.2165756   | 0.08636443 | 0.41230845  |
| C5 H4 N4 O3                          | 1.8022493    | 2.240119    | 1.174321   | -0.41473886 |
| C25 H52 O4 S                         | 0.84011924   | 1.076574    | -0.5008634 | -0.6027467  |
| C31 H27 N17                          | 3.7243497    | 1.3488594   | -0.6513942 | 0.67290235  |
| C15 H31 N4 O3 P                      | -1.3450178   | -1.5727322  | 1.1560141  | 0.41335273  |
| C20 H38 O2                           | 2.4422107    | 0.2025061   | -1.3499655 | -2.4753456  |
| C24 H51 N3 O8 S                      | 3.7236645    | 1.1756392   | 0.87818205 | 0.5805901   |
| C44 H82 N O3 P S2                    | 3.3214617    | -1.080568   | 0.3804193  | -1.1242318  |
| C22 H44 O2 P6                        | 3.2822382    | -1.0892886  | -0.767266  | -1.5134413  |
| C23 H48 N O9 P                       | 2.8444555    | -0.42970142 | 0.02630283 | -2.367151   |
| C23 H40 N6 O2 P6                     | 1.3368186    | 2.510333    | -0.3018737 | -0.75886047 |
| JASMONIC ACID [ISTD] (CAS# 77026-92  | 1.0535125    | -3.2185483  | -2.4510107 | 0.11477329  |
| C29 H37 N7 S                         | 1.0361419    | -0.9153287  | 1.3888584  | 0.55390346  |
| C36 H75 N9 O2 P2                     | 1.5820595    | -1.0796993  | 1.815834   | 0.1728567   |
| C10 H16 N2 O4                        | 3.3550673    | -0.16818358 | -0.7309856 | 1.5240726   |
| HYPOXANTHINE (CAS# 68-94-0); (M-H)   | 3.1085396    | 1.9535642   | -0.5037402 | -0.01347944 |
| 3-METHYLGULUTARIC ACID (CAS# 626-51- | 2.417884     | -0.67130464 | 0.49806285 | 0.56681377  |
| 5-AMINOPENTANOATE (CAS# 660-88-8     | 1.7683823    | -1.436594   | -0.2235268 | 0.6110972   |
| C17 H20 N10 O12 P4                   | -0.6105231   | -2.7358682  | -2.7556934 | 0.45351645  |
| C30 H41 N7 O2 S                      | 3.0005994    | -1.1677026  | 1.4215126  | -1.2378151  |
| C38 H78 N2 P2 S3                     | 3.162371     | 2.0797198   | -1.3565016 | -0.03612244 |
| C26 H40 N6 O3                        | 1.0050366    | 0.572415    | 1.0857587  | -1.4555395  |
| C6 H9 N3 O2                          | 2.2751286    | 0.154394    | -1.0992842 | 0.7279602   |
| C16 H19 N P2                         | -1.8254024   | -2.6274948  | -2.4720228 | 0.21781468  |
| C38 H76 O4 S                         | 3.1579456    | 2.173863    | -0.64701   | 1.0262468   |
| C34 H60 N6 O2                        | 2.9794354    | 0.7352077   | -1.0902456 | -0.1269998  |
| C39 H33 N9                           | 1.5936887    | -0.5000314  | 1.0152425  | -1.2169119  |
| C15 H15 N9 O                         | 1.4131433    | -3.2525954  | -2.0588763 | 0.32790542  |
| C22 H17 N6 O5 P                      | 0.74412596   | -3.1848395  | -2.6250257 | 0.19542971  |
| C35 H37 N O                          | 2.3782785    | -1.7072434  | 2.0478902  | 0.3416993   |
| PHYTANATE (CAS# 14721-66-5); (M-H)-  | 1.9175606    | 0.987123    | -1.0337534 | 0.73545384  |
| C28 H38 N4                           | 1.2737392    | -0.94138974 | 1.0749813  | -0.08416167 |
| GLUTARATE (CAS# 110-94-1); (M-H)-    | 1.0576098    | -1.1977632  | 1.2588191  | -0.36957172 |
| C10 H13 N5 O                         | -0.62487173  | -3.1976185  | -2.5543847 | 0.050267518 |
| C9 H2 N2 O5 S                        | -3.1463764   | 1.0711012   | -0.224963  | 0.36581355  |
| EPIBRASSINOLIDE [ISTD] (CAS# 78821-4 | 0.3484868    | -3.5224726  | -2.2494187 | 0.21597709  |
| C18 H32 O2                           | 3.6804137    | 1.7975616   | -0.9469271 | 0.15657735  |
| GIBBERELIC ACID [ISTD] (CAS# 77-06-5 | 1.0299956    | -3.2389865  | -2.4771023 | -0.13392106 |
| C18 H32 O3                           | 3.889784     | 0.91339254  | -0.1826482 | -0.45794675 |
| C29 H43 N3 O3 S2                     | 3.5154467    | 1.4759895   | -0.5002921 | 0.35096526  |
| C11 H9 Cl N8 O                       | 3.5505168    | 0.9670001   | 0.38696557 | 1.4080966   |
| DOCOSAHEXAENOIC ACID (CAS# 6217-1    | 2.5592313    | -0.7462171  | 0.21388996 | -1.6084168  |
| C39 H62 N2 O5 S                      | 3.5201828    | 1.4655677   | -0.8895063 | 0.70564437  |

|                                           |              |              |            |             |
|-------------------------------------------|--------------|--------------|------------|-------------|
| C14 H26 N6 O2                             | 3.2132215    | 0.42719546   | -1.0138229 | 0.10903782  |
| C23 H36 O P4                              | 3.2317898    | -0.79571223  | -0.8871923 | -1.6970004  |
| C36 H65 N5 O                              | 2.2853365    | -0.23617163  | 1.4623986  | -2.4744368  |
| C22 H33 N6 O17 P                          | 3.0715067    | 2.3889       | -1.0092317 | 0.42740887  |
| C34 H25 N5 O3                             | 1.1804094    | -3.1331906   | -2.4227202 | 0.003144741 |
| C20 H26 N6 O4                             | -1.126969    | 1.5539242    | -1.2674664 | -0.17923225 |
| HEPTADECANOATE (CAS# 506-12-7); (M-H)-    | 3.2045765    | 0.28038457   | -0.0376094 | 0.4441102   |
| N-ACETYL GALACTOSAMINE (CAS# 1811         | 3.250162     | -1.3362705   | 0.80851173 | 0.04778287  |
| C24 H35 N6 O2 P3                          | 3.0552852    | -1.0306025   | -0.7765322 | -1.0195416  |
| C40 H76 N2 O S3                           | -0.4125009   | -0.16345838  | -1.0207793 | 0.6064679   |
| C8 H12 N2 O4                              | 3.752519     | -0.17580795  | -0.4695178 | 1.2952743   |
| C18 H26 N10 O2                            | -2.880111    | -0.7002576   | -0.2731314 | -0.45314258 |
| C16 H34 N14 O6 P6                         | 3.7645063    | -1.1653973   | -0.7747716 | 0.5222439   |
| C34 H66 N6 O2                             | 2.703226     | 2.9047828    | -0.9168848 | 0.06862825  |
| N-ACETYL-DL-SERINE (CAS# 97-14-3); (M-H)- | 1.011768     | 2.3007717    | -0.3506578 | 0.89052606  |
| C19 H32 N3 O2 P                           | -2.7910597   | 0.8498511    | -1.5079659 | -1.2704952  |
| C38 H67 Cl N2                             | 1.4454114    | 0.028002558  | 1.1538473  | -0.3537396  |
| C24 H24 N4 O4                             | 2.1449072    | -2.5465183   | 0.04904719 | 1.4885755   |
| ZEATIN [ISTD] (CAS# 13114-27-7); (M-H)-   | -0.7070261   | -3.1614103   | -2.530493  | 0.071860254 |
| TRANS-VACCENIC ACID (CAS# 693-72-1        | 3.4857783    | 2.1807754    | -0.8492428 | 0.28638774  |
| NERVONIC ACID (CAS# 506-37-6); (M-H)-     | 0.70920146   | -0.12710509  | 1.3184097  | -2.0516567  |
| MALATE (CAS# 97-67-6); (M-H)-             | -0.29305986  | -0.004870629 | -0.9242873 | -1.951271   |
| C15 H35 N4 O3 P                           | 3.393397     | 2.2914374    | -0.9240614 | 0.29374588  |
| C15 H18 N6 P2                             | 1.8733327    | -2.8549154   | -2.0115771 | 0.08436553  |
| C31 H60 O S2                              | 0.29793435   | -0.28063297  | -0.4346634 | -0.24531247 |
| C22 H25 N2 O2 P                           | 2.019647     | 0.26564518   | -0.1202649 | -1.4368902  |
| EPIBRASSINOLIDE [ISTD] (CAS# 78821-4      | 0.35389483   | -3.5076401   | -2.241426  | 0.14225946  |
| C39 H72 Cl O2 P S                         | 3.1540177    | 1.9459867    | -1.2136552 | 0.002885282 |
| C31 H47 N O13 S2                          | 3.053734     | -1.2043117   | 1.6231987  | -0.48404917 |
| C30 H56 N O4 P S2                         | 3.5633154    | 1.9014916    | -0.0642582 | 0.3852101   |
| CITRULLINE (CAS# 372-75-8); (M-H)-        | 1.0881143    | 0.24658853   | -0.131769  | 1.7084477   |
| BEHENIC ACID (CAS# 112-85-6); (M-H)-      | 2.5631032    | -1.3781934   | 1.0419401  | -0.08327133 |
| C23 H33 N2 O7 P                           | 3.810921     | 1.4464201    | -1.0585669 | -0.08204883 |
| C10 H8 N3 O9 P                            | -0.7744913   | -1.085178    | 0.23351867 | -0.67195034 |
| N-ACETYL-DL-METHIONINE (CAS# 1115         | 3.4923983    | 1.5784589    | -0.5217328 | -0.14252037 |
| C10 H13 Cl N6 O                           | 0.39319146   | -3.3696554   | -2.3921242 | -0.2069311  |
| C29 H29 P                                 | 1.1456442    | 1.924092     | -1.0778965 | 0.1273764   |
| C19 H32 N6 O2                             | 2.5629773    | -0.27124885  | -1.5803107 | -2.0137234  |
| C25 H25 Cl N O P5                         | 2.3732557    | 1.1433342    | 1.3456407  | 1.6078109   |
| C22 H35 N6 O17 P                          | 2.5044987    | 2.2469459    | -1.6117353 | -0.7429372  |
| C27 H30 O12                               | 3.4451106    | -1.1697145   | -0.6017244 | -0.99784636 |
| C24 H40 N2 O17 P2                         | -2.355788    | 1.1261809    | -0.0084359 | 1.0366788   |
| C38 H78 N3 O P5                           | -1.0278767   | -0.100243986 | -0.9794898 | -0.60957026 |
| GLUTAMATE (CAS# 56-86-0); (M-H)-          | 1.0558084    | 2.7206454    | -0.3959324 | 0.63265795  |
| C7 H13 N O3 S                             | 3.4941027    | 1.579117     | -0.5210577 | -0.15553454 |
| C43 H62 N2 O5 S                           | 2.9537141    | -0.9370103   | 0.21089043 | -1.4074259  |
| C20 H39 N19 P2                            | -0.05497095  | 0.7161654    | -0.4526717 | -2.1556659  |
| C38 H64 O10 S                             | 3.9873705    | 0.9067919    | -0.7937706 | -0.20358866 |
| C27 H26 N4 O                              | -2.735599    | 1.675139     | 1.5944723  | -0.72589177 |
| C13 H33 N4 O3 P                           | 3.142437     | 1.8219961    | -0.8407832 | 0.3615836   |
| C28 H23 N5                                | 2.237652     | 2.8258471    | -1.3372648 | 0.7939509   |
| C26 H52 O2                                | 2.4000704    | -1.8028888   | 1.2936096  | 1.343435    |
| C4 H6 O4                                  | 1.6957963    | -0.6040092   | 1.9324672  | -1.6415895  |
| C25 H32 N8 O9 P2 S                        | 2.9656048    | 1.9132712    | -0.4682209 | 0.9602555   |
| ARACHIDONATE (CAS# 506-32-1); (M-H)-      | 3.5103452    | 2.037881     | -0.6102682 | 0.08958703  |
| C26 H50 N6 O2                             | 3.5186558    | -1.6777227   | -0.6060703 | 0.15916407  |
| C18 H24 N4 O12 P4                         | -0.43125963  | -2.691231    | -3.0718436 | 0.32682103  |
| C26 H29 N6 O3 P                           | 0.8775168    | -3.079328    | -2.571682  | -0.02755521 |
| C27 H39 N5 O                              | 2.0261319    | -0.8972181   | 0.75638115 | -0.11342704 |
| C8 H14 Cl N2 P                            | 1.7744062    | -1.459752    | -0.2003274 | -0.512368   |
| C30 H50 N O2 P3                           | 0.08015814   | 0.72961015   | 1.7207495  | -1.4577396  |
| GLUCARIC ACID (CAS# 87-73-0); (M-H)-      | 0.5200207    | 0.030879546  | 0.5508803  | -2.021683   |
| C23 H26 N10                               | 0.7752032    | -3.1690254   | -2.6118872 | -0.00434537 |
| CIS-11-EICOSENOIC ACID (CAS# 5561-9       | 2.4729605    | 0.15148935   | -1.3990386 | -2.4050179  |
| C36 H72 O4 S                              | 1.969538     | -1.4736108   | 0.61876166 | -0.43955454 |
| C38 H58 N6 O2                             | 3.3574226    | 1.2838919    | 0.55080545 | -0.9468158  |
| C43 H65 N2 O2 P S2                        | 3.5934584    | 1.0462064    | 0.2913816  | -0.5444006  |
| C30 H41 O5 P3 S2                          | 3.2030036    | 2.3525605    | 0.07984042 | 0.38745546  |
| C35 H45 Cl N2 O2 S3                       | 1.7340314    | -1.3130643   | 0.5353998  | -0.13210577 |
| C20 H41 N3 O P2                           | -1.7538737   | 1.490506     | -1.444207  | -1.4623573  |
| C29 H37 N11                               | 2.8564794    | 1.8313237    | -0.580267  | 1.3490508   |
| C18 H13 Cl N10                            | 1.3562565    | -3.1343513   | -2.428168  | -0.13162111 |
| URATE (CAS# 69-93-2); (M-H)-              | 1.8570256    | 2.2458544    | 1.1841558  | -0.36600047 |
| C27 H22 N4 O3                             | 3.1870337    | 1.5044097    | -0.3725301 | -0.6665264  |
| C18 H23 N3 O9                             | 3.1051803    | -1.3670305   | -0.7149172 | 0.23743388  |
| C20 H20 N10 O2                            | 1.3335199    | -1.2403293   | 0.47261685 | -0.1417707  |
| C19 H33 N4 O3 P                           | 2.9500613    | 0.99438375   | 0.02644087 | 0.8400047   |
| C14 H33 N6 O9 P                           | 3.776913     | 1.1894563    | -1.0653207 | 0.28540593  |
| C21 H35 O17 P                             | 1.992326     | 1.8128818    | -0.5514191 | 0.7566028   |
| C39 H81 N2 O3 P S2                        | 2.4272795    | -1.9159529   | 1.212703   | 1.1038026   |
| LYSINE (CAS# 56-87-1); (M-H)-             | -0.44480175  | 0.21593088   | -0.3377547 | -1.2152808  |
| C35 H70 N2 O P2                           | 1.533247     | -1.1805806   | 1.3841664  | 0.44328988  |
| C9 H19 N4 O4 P                            | 0.8240129    | -3.0632627   | -2.6610081 | -0.01294329 |
| C29 H45 N5 O5                             | 1.3318028    | -3.233487    | -1.3218683 | 0.13161083  |
| C16 H26 O2                                | -1.4170717   | 0.32425463   | -2.418273  | 1.3424014   |
| C34 H58 N6 O2                             | 3.305373     | -0.649624    | -1.0563961 | -1.481682   |
| C39 H67 N2 O P5                           | 3.230361     | 0.7406729    | -0.3785961 | -0.28250632 |
| C38 H65 O2 P3                             | 1.8072417    | 0.5564941    | -1.1477629 | 0.58814913  |
| C30 H58 N6 O2                             | 3.4427066    | 1.3169945    | -0.5819182 | 0.31751955  |
| C26 H19 N5                                | -0.113506585 | -0.45812297  | 1.6487311  | 0.6524896   |
| 4-HYDROXYBENZOATE (CAS# 99-96-7);         | 3.4332414    | 0.9294795    | -1.107369  | 0.61429965  |
| C38 H47 N O P2 S                          | 1.5962943    | -0.42124072  | 0.8753678  | -1.2554002  |
| C28 H19 N5                                | 2.7393017    | -0.5753044   | 0.9648831  | -1.584558   |
| C11 H22 N2 O3                             | 1.5082772    | -0.9480542   | 0.23053315 | -1.3755987  |
| C14 H20 O P2 S                            | 0.92912066   | -1.4675394   | -3.453045  | -0.57129645 |
| C36 H67 Cl N2 O                           | 1.3167703    | 0.058860853  | -0.0248264 | -0.16614264 |
| C24 H42 N2 O17 P2                         | 2.531666     | 2.0154157    | -1.5275156 | -0.4800313  |
| C23 H39 N8 O7 P5 S                        | -2.1870391   | -0.15534881  | -0.6261076 | 1.0110152   |
| C37 H66 Cl N11                            | 2.960626     | -1.662077    | 1.4801121  | 0.074086666 |
| 4-NITROPHENOL (CAS# 100-02-7); (M-H)-     | 2.6863408    | 0.36834726   | -0.8454549 | -0.60157806 |
| OLEIC ACID (CAS# 112-80-1); (M-H)-        | 3.4857783    | 2.1807754    | -0.8492428 | 0.28638774  |
| C24 H36 O10 P6                            | 3.8053136    | -0.2112391   | -0.3327076 | 1.0917504   |
| C19 H38 N2 O12 P2                         | 3.665621     | 1.8631806    | -0.8522182 | 0.31066382  |
| C6 H10 O3                                 | 3.321935     | -1.5232971   | 0.64488584 | 0.08708778  |
| C30 H41 N2 O P5                           | 2.934474     | -0.6343128   | -0.9621878 | -1.1174991  |

|                                      |              |             |            |             |
|--------------------------------------|--------------|-------------|------------|-------------|
| C27 H56 N3 O10 P S2                  | 3.744137     | 1.2006583   | 0.63613194 | 0.52533907  |
| C23 H28 N12 O P4                     | -1.397875    | 0.06839957  | -0.8237338 | -0.82394934 |
| C34 H29 Cl N6                        | 0.24794503   | -2.9800324  | -2.8349285 | -0.1726663  |
| C32 H43 N O4                         | 0.8265348    | -0.31290063 | 1.6229365  | 0.024804726 |
| C40 H69 Cl N2                        | 2.949699     | -0.9381982  | 0.14786811 | -1.3960218  |
| C30 H64 N10 S                        | 1.8106192    | 0.58704513  | 1.0953165  | 0.38610685  |
| C17 H44 Cl N9 O7 S                   | 1.4248619    | -0.6764475  | 1.7250029  | -0.38339412 |
| CORTISOL (CAS# 50-23-7); (M+HCOO)-   | 2.8083718    | -1.3170288  | 0.82020277 | 0.37970603  |
| METHYLMALONATE (CAS# 516-05-2); (    | 1.6924062    | -0.6072041  | 1.9082522  | -1.6490608  |
| 4-METHYL-2-OXOPENTANOATE (CAS# 5     | 2.2772317    | -1.6686109  | 1.0048051  | -0.01570413 |
| 16:0 LYSO PC (CAS# 17364-16-8); (M+H | 3.720935     | 1.2047147   | 0.8771271  | 0.5816772   |
| C17 H36 N2 O12 P2                    | 2.917808     | 0.53570163  | -0.9113178 | 0.6920412   |
| C33 H41 N11                          | 1.4385625    | -1.1882374  | 0.6305076  | -0.56235605 |
| C25 H36 N11 O3 P                     | 3.8493085    | 0.8562822   | -0.3828986 | 0.83237064  |
| C11 H18 N2 O4                        | 3.4882846    | 0.8322859   | -0.8526957 | 0.8330169   |
| C44 H69 N2 P S2                      | 2.4518805    | -0.56859756 | 0.12481329 | -1.1370538  |
| C20 H22 N2 O12                       | -0.2139411   | -3.174626   | -2.7636635 | -0.27443376 |
| C15 H30 O2                           | 3.6268063    | 0.5964856   | -1.2320408 | -0.73504275 |
| C21 H31 N2 O7 P                      | 3.500039     | 1.2502675   | -0.5202296 | 0.43726283  |
| C29 H44 N4 O3                        | 0.4356402    | -3.540259   | -2.215656  | 0.23365125  |
| C36 H36 N8 O3                        | -0.67857456  | -3.1934252  | -1.787334  | -0.4554711  |
| C36 H62 N11 P                        | -0.15384121  | 1.712839    | -1.8168457 | -0.7207706  |
| C22 H37 N2 O P5                      | 3.662548     | -0.41822425 | -0.419759  | 1.2955526   |
| C35 H62 N8 O8                        | 3.8353417    | 1.421824    | -0.9974214 | -0.00610793 |
| C34 H64 N2 O2 S4                     | 2.2934604    | 0.9647889   | 1.4531277  | 0.4219486   |
| C32 H67 O2 P S2                      | -0.16493669  | -0.30219066 | -0.6281762 | 2.3351893   |
| C9 H8 O13 P2                         | -0.029210508 | -1.0530652  | 2.1118038  | 2.16383     |
| C28 H51 N3 O8 S                      | 3.4143455    | 0.8087901   | 1.0885689  | 0.9708747   |
| C27 H19 N9 O5                        | 2.8389995    | -1.2710112  | 1.3008685  | -0.49604106 |
| CYCLOHEPTANECARBOXYLIC ACID (CAS     | 3.354122     | 0.35396582  | 0.10241167 | -0.7309668  |
| C30 H50 O17                          | -1.3407484   | 1.5752438   | 0.66056895 | -1.5715399  |
| C11 H19 P3                           | 3.8382132    | 1.1919614   | -0.506254  | 0.77880716  |
| C26 H40 O19 P2 S                     | 2.150027     | -0.42290136 | -1.5657879 | -1.0747461  |
| C27 H31 N5 O2 P2                     | 2.8533504    | -1.4081017  | 1.3733647  | -0.28976858 |
| C25 H44 N11 O5 P                     | 0.30601314   | -0.44172177 | 0.9659904  | 1.6942871   |
| C24 H48 N6 O3                        | 2.2920825    | -0.8049146  | 0.7563817  | -1.385998   |
| C24 H44 O2 P6                        | -0.25071096  | 0.346694    | -0.9836464 | 0.12086585  |
| 3-(4-HYDROXYPHENYL)LACTATE (CAS# 1   | 1.4072857    | -0.79816365 | 2.0515046  | -0.9709769  |
| C22 H38 S2                           | 1.1929396    | -0.9727392  | 0.7710807  | 0.83388615  |
| C26 H34 N6 O P2                      | 2.0062137    | -2.9211564  | -1.9814581 | 0.12504248  |
| ELAIDIC ACID (CAS# 112-79-8); (M-H)- | 3.4853075    | 2.181255    | -0.8499124 | 0.28670573  |
| URIDINE (CAS# 58-96-8); (M+Cl)-      | 3.3365297    | -1.2050915  | -0.4969089 | -0.5648609  |
| C20 H30 O2                           | 3.4544437    | 0.3845294   | 0.00848264 | -0.19559282 |
| C13 H18 N2 O9                        | 0.32317764   | -3.163257   | -2.6974545 | 0.17877713  |
| C24 H38 O19 P2 S                     | 3.2332616    | -0.9788161  | -0.973169  | -1.4533067  |
| C14 H13 N2 O2 P                      | 3.744624     | 0.6926231   | 0.02213    | 1.0420913   |
| MYRISTOLEIC ACID (CAS# 544-64-9); (M | 2.9965923    | -1.777784   | 0.5724983  | -0.25356317 |
| C27 H52 N4 S2                        | 0.5086032    | 0.19901958  | 0.36900613 | -1.017306   |
| L-[15N]ANTHRANILIC ACID [ISTD] (CAS# | 3.5304568    | -1.0067921  | -0.1618104 | 0.9468733   |
| C17 H31 N4 O3 P                      | 2.0119402    | -0.85316396 | -1.270138  | 0.98647875  |
| C18 H37 N2 O14 P3 S                  | 3.8129656    | -0.6401682  | -0.570877  | 0.9902754   |
| C28 H52 O4                           | 1.3273978    | -0.38201213 | 0.593805   | -0.54844797 |
| C18 H21 N16 O4 P5                    | -0.15621938  | -3.2616286  | -2.5882378 | -0.38424188 |
| C38 H55 O P5 S                       | 0.9436612    | -3.203213   | -2.5237868 | -0.16146408 |
| C22 H35 N5                           | 2.5291207    | 0.9824897   | 0.30885834 | -0.5003239  |
| C18 H22 N4 O4                        | 3.7382176    | -0.8076307  | -0.5619279 | 0.87970996  |
| GAMMA-LINOLENIC ACID (CAS# 506-2E    | 3.1202831    | 1.7694794   | -0.8594717 | 0.3190968   |
| C20 H40 N2 O3 S2                     | 2.8458827    | 2.4974618   | -1.195361  | -0.31026053 |
| LIGNOCERIC ACID (CAS# 557-59-5); (M  | 3.1281013    | -1.2757708  | -0.0665999 | 0.13826099  |
| C30 H20 N2 O                         | 2.9584286    | 0.9860613   | -0.7342073 | 0.8934781   |
| C17 H38 N2 P2 S                      | 2.899837     | -0.8065266  | 0.27713037 | -1.7889326  |
| C12 H18 O3                           | 1.0346087    | -3.2261984  | -2.4574854 | 0.08868465  |
| C9 H17 N O4                          | 2.927373     | -1.2620162  | 1.0732048  | 0.26108795  |
| C9 H17 N O5                          | 3.9029279    | 0.94147474  | 0.06163393 | 0.42519593  |
| C29 H46 N10                          | 2.1733077    | -1.1282051  | 1.3478607  | 0.20982209  |
| C42 H65 N2 P S2                      | 2.7399175    | -0.40222153 | -1.4190392 | -1.1493179  |
| C32 H66 N6 O P2                      | 2.3198924    | -0.41410887 | -1.7635367 | -1.4665784  |
| C40 H50 N3 O2 P3                     | 1.2135991    | -0.8463165  | 0.7042227  | 0.6730786   |
| C36 H70 N2 O8                        | 3.00138      | 2.6312919   | -1.0077205 | 0.18556583  |
| C26 H25 P                            | 2.8469746    | -0.6090919  | -1.7110262 | -1.7319939  |
| VALINE (CAS# 72-18-4); (M-H)-        | 1.6221353    | -1.5283015  | -0.2344909 | 0.85426784  |
| DIACETYL (CAS# 431-03-8); (M+HCOO)   | 1.0728003    | -1.2081821  | 1.2886264  | -0.34007064 |
| C13 H24 N6 O2                        | 4.014375     | -0.47766626 | -0.5121292 | 0.6974336   |
| C13 H28 O6 S2                        | 1.3170798    | 0.002667881 | 1.1050031  | -0.86449045 |
| C4 H8 O7                             | 1.9709313    | 1.6455625   | -0.0891783 | -0.1575925  |
| C13 H16 N2 O4                        | 2.7217765    | -0.9972651  | 0.22087735 | -0.51077294 |
| C43 H70 N2 O5 S                      | 2.7645879    | 2.4489405   | -1.3572623 | -0.09880573 |
| C19 H32 N2 O8                        | 2.9540904    | -1.0556761  | 0.2040229  | -1.1712774  |
| C24 H35 N10 O7 P5                    | 3.7726464    | 0.26247692  | -0.8729744 | -0.78716904 |
| C43 H67 O6 P S                       | 3.008521     | -1.0161638  | 0.52532816 | -1.4904377  |
| C23 H24 N4 O S                       | 2.0461035    | 0.057120755 | 0.9389442  | -2.189272   |
| C13 H21 Cl3 N12 O S                  | 0.9025714    | -1.1060557  | 1.2884388  | 1.3043119   |
| C13 H14 O P2                         | 1.1964587    | -0.28104585 | 0.4303298  | -0.11502639 |
| C26 H30 N4 O S                       | -2.5984142   | -0.5882404  | 0.48689997 | 0.4880267   |
| C20 H24 N18 O P4                     | 3.6937926    | 0.6409011   | -0.7320008 | -0.30600297 |
| C24 H48 O2                           | 3.1284242    | -1.2795203  | -0.0732811 | 0.14154175  |
| C28 H52 S2                           | 1.6861176    | -0.9837929  | 0.6728899  | -0.04752296 |
| C25 H49 N2 O2 P                      | 0.75877124   | 0.7509977   | 0.48217773 | -0.09038331 |
| URIDINE (CAS# 58-96-8); (M-H)-       | 3.7043748    | 1.3734437   | -0.5862576 | 0.822935    |
| PANTOTHENATE (CAS# 79-83-4); (M-H)   | 3.8960824    | 0.9699633   | 0.05286819 | 0.43844467  |
| C17 H17 N2 O8 P                      | -0.15944561  | -2.9657025  | -2.9197302 | 0.004986145 |
| C26 H40 O13 P2                       | 4.020986     | 0.6446963   | -0.4594034 | -0.38639325 |
| C18 H34 S4                           | 3.1298132    | -0.8252269  | 0.9610246  | 0.14007342  |
| C17 H32 O2                           | 3.1343703    | -0.8820045  | -1.1497349 | -1.4487067  |
| C13 H25 N O3                         | 3.627405     | 0.59961694  | -0.2681073 | 0.3719542   |
| C9 H14 N2 O23 P4 S                   | -3.0500169   | -0.11992133 | 0.05639967 | 0.54633915  |
| C20 H29 N14 O P5                     | 3.9326277    | -0.52482986 | -0.4441799 | 0.93881714  |
| C16 H20 N4                           | -2.364387    | 0.34294152  | -1.8549818 | 0.5541779   |
| C30 H41 N O4                         | 1.9122039    | 2.9271753   | 0.20592889 | -0.5007815  |
| C42 H67 N2 P S2                      | 2.6550062    | -0.29750416 | -0.9622568 | -1.2374735  |
| C31 H45 N9 O10                       | 3.2063735    | -0.64329076 | -0.4265223 | -1.6482823  |
| L-TRYPTOPHAN-15N2 [ISTD] (CAS# ); († | 1.3477833    | -1.9355996  | -2.0690956 | 0.4900372   |
| C15 H33 N4 O3 P                      | 3.7262247    | 1.6347264   | -0.9928753 | 0.002285123 |
| C31 H27 P                            | 1.3865799    | -0.39967334 | -1.3872584 | 0.85271627  |
| SUCCINATE (CAS# 110-15-6); (M-H)-    | 1.6924062    | -0.6072041  | 1.9082522  | -1.6490608  |

|                                      |              |              |            |             |
|--------------------------------------|--------------|--------------|------------|-------------|
| C35 H57 N7 O2 S                      | 2.166044     | 2.646319     | -0.2334481 | 0.80750686  |
| C33 H46 Cl N O4                      | 1.3899344    | -0.62234515  | 1.7227653  | 0.1162678   |
| C26 H27 N8 O5 P5                     | -0.34898975  | -3.2757163   | -2.6090114 | -0.09668136 |
| C20 H36 N12 O2 P6                    | 3.761347     | 1.2564223    | -0.5755767 | -0.7385696  |
| C30 H54 O3 S2                        | 0.40710163   | -3.3111002   | -2.510631  | 0.46154007  |
| 4-NITROBENZOIC ACID (CAS# 62-23-7);  | -0.76112044  | 0.17569816   | -1.2316654 | -0.95360327 |
| C17 H28 O5                           | 2.6279619    | -2.045515    | -0.2603674 | 0.9324859   |
| C29 H42 N4                           | 1.6093806    | -0.35962647  | 2.2388897  | -0.68087804 |
| RETINOATE (CAS# 302-79-4); (M-H)-    | 2.888102     | 0.05045106   | -0.830991  | 0.87015     |
| LAURIC ACID (CAS# 143-07-7); (M-H)-  | 4.0041285    | -0.4135735   | -0.3175506 | 0.7554733   |
| C42 H85 N S2                         | 2.849147     | -1.3940029   | 1.8092462  | -0.59553564 |
| C26 H9 Cl N9 O2 P                    | 2.009179     | 1.4892162    | 0.8614636  | 2.1123574   |
| C8 H7 N O4 S                         | 0.7506505    | 0.32850432   | -1.539968  | 0.071068734 |
| C19 H30 N6 O2                        | 3.0201101    | 0.15272155   | 0.80108905 | -0.7483052  |
| C27 H26 N11 P5                       | 2.8556392    | -1.4279798   | 0.5798973  | 0.49137622  |
| C36 H27 N2 O12 P S                   | -1.0102123   | 0.5776031    | 1.6937107  | -1.270884   |
| C42 H70 O3 P2 S                      | 2.5218287    | -0.9269197   | -1.2483149 | -1.6443739  |
| ALLANTOIN (CAS# 97-59-6); (M-H)-     | -1.3476741   | -0.36552447  | -0.578112  | 1.3827324   |
| C7 H6 O2                             | 3.303269     | -0.7050364   | -0.1017107 | -0.04070443 |
| C24 H33 N3 O2                        | 2.880862     | -0.24914032  | 1.6953205  | 1.5830572   |
| D-GLUCOSE 6-PHOSPHATE (CAS# 56-73    | -0.1324199   | 1.3934877    | -0.3662897 | -0.37509662 |
| BENZOATE (CAS# 65-85-0); (M-H)-      | 3.302492     | -0.70883787  | -0.1030746 | -0.02595019 |
| C37 H80 N9 O P                       | 2.645639     | -1.0291162   | 1.0222558  | -1.4989352  |
| C11 H14 N6 O S3                      | 2.9478216    | 1.3134844    | -0.5206163 | 0.6729297   |
| C40 H68 N3 O P S2                    | 1.9900584    | 0.21843949   | -1.232959  | -2.1204875  |
| C36 H72 Cl N3                        | 2.8178043    | -1.0515115   | 1.2828598  | -1.613889   |
| C32 H54 N8 P4                        | 0.012874499  | -3.083403    | -2.1849136 | 0.14103758  |
| C20 H35 N5 O7 P2 S                   | 3.0933573    | -1.4809391   | -0.6054097 | 0.37707055  |
| 16:0-18:0 PC (CAS# 59403-51-9); (M+C | 0.8793972    | -0.8280072   | 0.7234053  | 0.47779778  |
| 5'-METHYLTHIOADENOSINE (CAS# 2457    | -0.072258145 | 0.2671495    | 1.1443529  | -1.3572898  |
| OXIDIZED GLUTATHIONE (CAS# 27025-    | 0.39319712   | 0.24654393   | -0.0077107 | -1.5858246  |
| C26 H14 N2                           | 2.5814347    | -1.1794778   | 1.251524   | -0.6280947  |
| C13 H13 O28 P3 S                     | -2.1963925   | -0.81147647  | 0.90342236 | 1.0730428   |
| C10 H8 N2 O19 P2                     | 0.6617268    | -1.4390224   | 2.2333567  | 2.0926611   |
| C26 H40 N6 O3 S2                     | 1.5170524    | -1.656635    | 0.403895   | 2.166733    |
| PALATINOSE (CAS# 343336-76-5); (M+H  | 1.2030311    | 0.20718269   | -2.048124  | -0.10045564 |
| C8 H7 Cl2 N5 O4 P2                   | 3.471129     | 0.9005426    | -0.2412712 | 0.6006947   |
| C7 H9 N4 O6 P3 S2                    | -3.0067687   | 1.3385302    | -1.9556134 | -1.3181726  |
| MALEIC ACID (CAS# 110-16-7); (M-H)-  | 0.3193927    | -0.974259    | -1.289231  | -0.15185562 |
| C18 H33 Cl O16                       | 1.531208     | -1.492887    | -1.921602  | 1.3827794   |
| C3 H8 N O3 P                         | 2.8894982    | -0.10325524  | 1.5872092  | 1.496835    |
| C23 H43 N O4 P2 S                    | 2.0310097    | -1.596253    | 0.5973399  | 2.2521033   |
| C21 H36 S2                           | 2.2983196    | -0.41140392  | 0.26352853 | -1.8698249  |
| C31 H59 Cl2 N2 O3 P                  | 2.212895     | 0.4223283    | -0.4459548 | -1.1103617  |
| C26 H47 N O6 P2 S                    | 1.9098806    | -1.5596654   | 0.36985487 | 2.2901306   |
| C17 H6 Cl N7 O4 S                    | 1.4920162    | 0.92551064   | 1.1520876  | 1.7478521   |
| C11 H14 O19 P4 S                     | -3.3285248   | 0.39501575   | -0.5986405 | -0.21569437 |
| C42 H72 N3 P S2                      | 1.3537985    | 0.33666623   | 1.1618519  | -2.6257286  |
| 4-HYDROXYBENZALDEHYDE (CAS# 123-     | 3.302668     | -0.711876    | -0.1053905 | -0.02186269 |
| L-ARGININE (CAS# 74-79-3); (M-H)-    | -1.0476792   | -1.5281872   | -1.6074399 | 0.39839482  |
| C25 H27 Cl N4 O2                     | 2.5549672    | -1.8257923   | -0.0206694 | 0.5181366   |
| C27 H26 N4 O2                        | 1.8298157    | 2.8684886    | -0.6627441 | -0.08964872 |
| C38 H71 N O3 S3                      | 0.6291885    | 0.8403217    | 0.13142386 | -3.1101508  |
| MANNOSE-6-PHOSPHATE (CAS# 3672-1     | -0.132302    | 1.3934075    | -0.3658104 | -0.37663123 |
| S-ADENOSYL-L-HOMOCYSTEINE (CAS# 5    | 1.5168115    | -1.0442486   | 1.366917   | -0.7650547  |
| 3-HYDROXYKYNURENE (CAS# 2147-6       | 1.504455     | -1.2740965   | -0.3305674 | 1.0340102   |
| C37 H61 N7 O2 S                      | 2.7259858    | 2.4297383    | -1.5015268 | 0.08444911  |
| C39 H40 N9 O4 P                      | 1.882082     | -3.0170546   | -1.9756639 | 0.30482343  |
| C35 H71 N S2                         | 1.3428503    | 0.20112535   | -0.0094991 | -2.623525   |
| GLUCOSE (CAS# 50-99-7); (M+Cl)-      | 3.164924     | -0.229921    | 0.03973783 | 1.4717561   |
| GUANOSINE (CAS# 118-00-3); (M-H)-    | 3.5515058    | 0.34181023   | -0.8906904 | 1.2708306   |
| C5 H11 N O3 S2                       | 0.28628758   | -0.056874283 | 1.2334517  | -0.62604266 |
| D-PSICOSE (CAS# 551-68-8); (M+Cl)-   | 3.165604     | -0.22995208  | 0.03993404 | 1.4706981   |
| 3-HYDROXYBENZALDEHYDE (CAS# 100-     | 3.3067212    | -0.70639056  | -0.0971908 | -0.02760124 |
| XANTHOSINE (CAS# 146-80-5); (M-H)-   | 0.17633402   | 0.7934376    | -1.364512  | -3.3020492  |
| C19 H22 N14 O3 S2                    | 3.1339622    | -1.4756545   | -0.1756385 | 0.41540086  |
| C6 H13 Cl O6                         | 3.1674469    | -0.23469034  | 0.03703233 | 1.4648968   |
| C17 H38 N6                           | 2.5344112    | 0.8084494    | -1.5082245 | 0.62095195  |
| C44 H81 N S                          | 2.900768     | -1.612214    | 1.1365921  | -0.07291102 |
| C31 H67 N5 O5 P2                     | -0.2989675   | 1.8573904    | 0.39008418 | -0.19688064 |
| C14 H22 N2 O5 S                      | 2.5804298    | -0.5941384   | 1.7588553  | 1.084046    |
| SUBERIC ACID (CAS# 505-48-6); (M-H)- | 3.0261848    | 0.382388     | -0.2635973 | 0.37378496  |
| NAD (CAS# 53-84-9); (M-H)-           | -0.39138484  | 0.96796125   | -0.2503607 | -2.8724346  |
| C9 H14 N2 O5                         | 1.7975085    | -1.4426324   | -0.1664234 | -0.3590275  |
| DEOXYCYTIDINE (CAS# 951-77-9); (M+H  | 1.188916     | -0.2939325   | 0.05442749 | -1.0466777  |
| C28 H28 N2 O15                       | 2.9510157    | -1.3986628   | 0.53137976 | 0.37940222  |
| C25 H48 P2 S3                        | 2.3247938    | -1.4844211   | 0.602445   | 2.1534166   |
| C13 H3 N2 O5 P                       | 1.7319493    | -0.72275627  | 0.33671528 | -0.44587737 |
| GUANINE (CAS# 73-40-5); (M-H)-       | 2.3928475    | -0.27256173  | -0.2649082 | 1.4601852   |
| C42 H72 N3 O P S2                    | 2.572225     | -1.5213889   | 1.1190419  | 0.21384251  |
| C14 H6 Cl2 N O5 P                    | 0.5778755    | 0.19468552   | -0.6995641 | 0.8455635   |
| C47 H59 N5 O                         | 2.5373995    | 2.6335516    | -0.8986305 | 0.19965643  |
| C32 H21 N7 O6 P2                     | 3.037782     | -0.002919292 | 1.4736471  | 1.5605966   |
| 16:0-18:0 PC (CAS# 59403-51-9); (M+H | 1.5211176    | -0.9738661   | 1.7337496  | -0.7173408  |
| STACHYOSE (CAS# 54261-98-2); (M+Cl)  | 0.46861705   | -2.1324854   | -2.1060805 | 1.2364223   |
| C24 H19 N3 O9 P2                     | 2.715528     | 0.09363114   | 1.5577846  | 1.64277     |
| C18 H23 N9 O11 S                     | 2.830196     | 0.60364234   | -1.1480656 | 0.20669535  |
| CMP (CAS# 63-37-6); (M-H)-           | 0.59097296   | -0.6772405   | -0.6042494 | 1.3785515   |
| C25 H36 N5 O2 P                      | -1.0893487   | 0.8430797    | -1.4204699 | -1.0532203  |
| C18 H27 N3 O2 P2                     | 3.0227275    | -1.3786632   | -0.1309364 | -0.45520276 |
| RIBOFLAVIN (CAS# 83-88-5); (M+HCOO   | 1.2982999    | -0.9421869   | 1.1718167  | 0.10554439  |
| C42 H83 N O5                         | 1.5980682    | -0.25889128  | 1.1193529  | -2.417091   |
| C8 H15 N O4                          | 2.9452791    | -1.3597201   | 0.8117761  | 0.6485543   |
| MELIBIOSE (CAS# 585-99-9); (M+Cl)-   | 1.1954015    | 0.26085708   | -2.0602868 | -0.11723737 |
| GLUCOSE 1-PHOSPHATE (CAS# 59-56-3    | -0.13232642  | 1.3934243    | -0.3659104 | -0.37631124 |
| C42 H79 N5 O                         | 2.4976099    | -1.6195542   | 0.90244037 | 0.3017726   |
| C29 H18 N8                           | 1.245372     | -1.7195059   | -0.9097474 | 0.5692561   |
| PROSTAGLANDIN E2 (CAS# 363-24-6); (M | 2.5404725    | -0.6450386   | 0.1662054  | -1.6149349  |
| UROCANATE (CAS# 104-98-3); (M-H)-    | 2.7544641    | -0.45237306  | 0.43854782 | 1.7518545   |
| C19 H16 N10 O8 S                     | 0.1646223    | -3.284565    | -2.6098275 | -0.16613382 |
| INOSINE (CAS# 58-63-9); (M+Cl)-      | 3.7097096    | 0.7383733    | 0.37603298 | 1.0040616   |
| THROMBOXANE B2 (CAS# 54397-85-2);    | 2.5671792    | -0.6394979   | 0.09924638 | -1.6046566  |
| C8 H18 O20 P4 S                      | 0.84274507   | -1.4960891   | 2.2490056  | 2.0889945   |
| C15 H28 N4 S2                        | 2.2346869    | -1.6737754   | -0.0027631 | 2.246348    |
| C35 H74 N9 O4 P                      | 2.289106     | -0.33638516  | 0.78692997 | -2.152616   |



|                                       |              |              |            |             |
|---------------------------------------|--------------|--------------|------------|-------------|
| C23 H27 Cl O8 S                       | 2.3408432    | -1.4995764   | 1.1139308  | 0.67945987  |
| MANDELIC ACID (CAS# 611-71-2); (M+)   | 2.9105973    | -0.069534905 | 1.5828221  | 1.5212419   |
| D-TAGATOSE (CAS# 87-81-0); (M+Cl)-    | 3.164924     | -0.229921    | 0.03973783 | 1.4717561   |
| C28 H14 N2                            | 0.5287407    | 1.2791598    | 0.08091165 | 0.882109    |
| BETA-MALTOSE (CAS# 69-79-4); (M+Cl)   | 1.1996348    | 0.19164656   | -2.067545  | -0.11709042 |
| 5'-DEOXYADENOSINE (CAS# 4754-39-6)    | 0.043592542  | 0.6642311    | -0.4401517 | -1.1298872  |
| CELLOBIOSE (CAS# 528-50-7); (M+Cl)-   | 1.2030311    | 0.20718269   | -2.048124  | -0.10045564 |
| C23 H23 Cl N4 O2                      | 2.4580078    | -2.3932812   | 0.01387078 | 1.6539359   |
| 10-HYDROXYDECANOATE (CAS# 1679-5      | 2.33953      | -0.5770947   | -0.2286916 | -1.24053    |
| N-ACETYLNEURAMINATE (CAS# 131-48      | -0.36916006  | 0.42500594   | -1.7654452 | -2.5398858  |
| SERINE (CAS# 56-45-1); (M-H)-         | 0.8544042    | -0.4610137   | -1.6616898 | 1.626031    |
| C35 H63 N5                            | 1.0687101    | 0.5378887    | 0.42424816 | -3.0369456  |
| C11 H19 N3 O3                         | 2.5711653    | -1.5721489   | 0.48825422 | 1.3171647   |
| C43 H85 N O6                          | 2.1942928    | -0.81812596  | 1.0643836  | -1.827763   |
| C8 H12 N2 O5                          | 2.6879933    | -0.89904153  | 0.07236133 | 2.2864676   |
| C19 H39 Cl2 N4 O3 P3 S2               | 2.8606632    | -1.2030072   | -0.8649355 | 1.520688    |
| C9 H10 O4                             | 1.6239606    | -1.0089104   | 1.4116502  | -0.8537499  |
| 3'-CMP (CAS# 63-37-6); (M-H)-         | 0.8500412    | -0.9637941   | -0.5327459 | 1.340022    |
| GUANOSINE (CAS# 118-00-3); (M+Cl)-    | 2.8354647    | 0.8930408    | -0.5942115 | 1.6418308   |
| C16 H18 N16                           | 3.3883362    | 0.2865974    | -0.8930495 | -1.8338095  |
| C22 H32 N4 O                          | 2.6256702    | -1.3578961   | -0.4438723 | 0.9071621   |
| C29 H26 N2 P4                         | 1.3532835    | -1.1990203   | 0.28751025 | 0.5106669   |
| SUCROSE (CAS# 57-50-1); (M+Cl)-       | 1.1998528    | 0.1987197    | -2.0682755 | -0.12256241 |
| C13 H19 N2 P S                        | 1.9305794    | -0.43810865  | -0.4678042 | 2.5694778   |
| C12 H15 N O4                          | 2.1966808    | -1.4304277   | 1.7627695  | 0.6568988   |
| SN-GLYCERO-3-PHOSPHOCHOLINE (CA       | 2.001791     | 1.6315641    | 0.2327474  | 0.40196958  |
| ALPHA-D-GALACTOSE 1-PHOSPHATE (C      | -0.13273567  | 1.3936917    | -0.3675675 | -0.37099844 |
| BETA-MALTOSE (CAS# 69-79-4); (2M+Cl)  | 0.4818462    | -2.1471722   | -2.106651  | 1.243191    |
| C18 H34 N3 O P S4                     | -0.7401624   | 1.8098172    | -3.0829031 | -0.9695611  |
| FUMARATE (CAS# 110-17-8); (M-H)-      | 0.1436427    | -0.8701948   | -0.2946073 | -0.31395447 |
| C16 H28 N13 O2 P5                     | 2.5607047    | -0.015508548 | -1.3572712 | -0.43193376 |
| C35 H49 N7 O5 S2                      | 0.5945167    | -1.3447223   | -0.0248941 | 1.9727967   |
| C46 H93 N O S2                        | 2.389697     | -1.3534372   | 1.7168269  | -0.5823402  |
| C17 H33 N4 O4 P                       | 2.86268      | -1.2980514   | 0.7284461  | -0.8122922  |
| C14 H14 O22 P4                        | 1.069714     | -1.4875733   | 2.2361188  | 2.083927    |
| MALTOSE (CAS# 69-79-4); (M+Cl)-       | 1.1869487    | 0.24326433   | -2.0622153 | -0.12503386 |
| C40 H70 N3 O P S2                     | 2.9275682    | -1.352004    | 0.9491575  | -0.6451574  |
| C29 H22 N2                            | 3.3962522    | -0.29250142  | 0.13611491 | -0.07803583 |
| C6 H6 N2 O2                           | 1.5188842    | 0.020996675  | 0.47710136 | 1.8665577   |
| 24:0 SM (D18:1/24:0) (CAS# 60037-60-; | 2.0056067    | -1.3376863   | 2.2597537  | 0.34905684  |
| C43 H89 N S2                          | 2.4353676    | -1.2204335   | 1.4122297  | -0.8108321  |
| C10 H13 N5 O5                         | 3.5631018    | 0.5371945    | -0.6889082 | 1.1167479   |
| C24 H43 Cl O21                        | 0.45318556   | -2.123685    | -2.1470625 | 1.2107718   |
| C4 H7 N O4                            | 0.18590316   | 1.2197578    | -1.9076208 | -0.20770893 |
| ASPARTATE (CAS# 56-84-8); (M-H)-      | -0.2757756   | 1.196712     | -1.8715967 | -0.46048537 |
| URACIL (CAS# 66-22-8); (M-H)-         | 1.1179377    | 0.31749043   | -0.8361426 | -2.3412936  |
| C37 H75 N S2                          | 2.4013124    | -0.32501885  | 1.3462524  | -2.1880343  |
| RIBOFLAVIN (CAS# 83-88-5); (M-H)-     | 0.87265414   | -0.80076516  | 0.83259034 | 0.5761025   |
| C24 H47 N7 O2 S2                      | 1.4322913    | -1.0825984   | 0.8249725  | -0.07742421 |
| PHENOL (CAS# 108-95-2); (M-H)-        | 1.1833808    | -1.5971897   | -0.0201962 | 1.2980952   |
| METHIONINE (CAS# 63-68-3); (M-H)-     | 2.004013     | 1.0315694    | -0.8616858 | 2.133198    |
| GLUTATHIONE (CAS# 27025-41-8); (M-    | 0.39319712   | 0.24654393   | -0.0077107 | -1.5858246  |
| C22 H19 P                             | 0.88399863   | -1.2542976   | -0.2491695 | 1.5060735   |
| C11 H13 N3 O5                         | 1.3695567    | -1.1761587   | -0.7089964 | -0.92652273 |
| LEUKOTRIENE B4 (CAS# 71160-24-2); (   | 1.8554385    | -0.47787592  | 0.09862879 | -0.7279676  |
| C42 H85 N O S2                        | 2.311404     | -0.52254504  | 0.8789779  | -2.3284354  |
| C17 H32 N6 O4 P2                      | 1.5701796    | -0.85554475  | -0.6182217 | 0.35301435  |
| C6 H13 N3 O3                          | 1.1136719    | 0.27228984   | -0.1385082 | 1.6951576   |
| 5-HYDROXYTRYPTOPHAN (CAS# 4350-0      | 1.9599204    | -2.0229533   | 0.08430594 | 0.7055303   |
| C21 H33 N3 O3                         | 2.6619682    | 0.022825774  | 1.1057949  | 0.32489675  |
| C35 H73 P S5                          | 2.1952028    | -0.36209193  | -1.0854447 | -1.1751089  |
| GLUCOSE (CAS# 50-99-7); (2M+Cl)-[H-   | 1.4529365    | -0.20345105  | -1.9507797 | 0.61174786  |
| C34 H57 N4 O4 P                       | 2.6048234    | -1.9407119   | 0.08196321 | 0.4801459   |
| C28 H25 N3 O P6                       | 1.803575     | 1.297109     | 1.6474675  | 1.484905    |
| C29 H31 N5 P4                         | 2.6999016    | -1.608936    | 0.41619807 | 0.25708044  |
| FRUCTOSE (CAS# 57-48-7); (M+Cl)-      | 3.164924     | -0.229921    | 0.03973783 | 1.4717561   |
| ADENOSINE (CAS# 58-61-7); (M+HCOO     | 2.0881805    | -0.027044212 | 0.92369044 | -1.8591694  |
| C5 H7 N O3                            | 2.504966     | 0.25354385   | -0.2413103 | 2.346775    |
| C20 H15 O2 P                          | 2.6953595    | -1.3565253   | -0.4843664 | 0.6729628   |
| C33 H51 N O2 P2                       | 3.9492872    | 0.25523645   | -0.4409024 | 0.64041364  |
| C25 H40 N2 O10 S4                     | -0.6501705   | 0.61235803   | 1.5055195  | -1.3393428  |
| C39 H84 N9 P                          | 2.1813715    | -0.17012165  | -0.8543945 | -1.1875701  |
| C29 H48 N4 O3                         | 2.0523252    | 1.4383874    | -1.3655884 | 0.2440758   |
| C33 H59 Cl N2 O6                      | 3.3171768    | 1.5588627    | -1.3228772 | 0.6696688   |
| C31 H54 S2                            | 2.7730815    | -0.07837209  | 0.50573796 | 0.06476444  |
| LACTOSE (CAS# 63-42-3); (M+Cl)-       | 1.1869487    | 0.24326433   | -2.0622153 | -0.12503386 |
| C12 H23 Cl O11                        | 1.0988057    | 0.34876624   | -2.0584002 | -0.2871719  |
| C8 H3 N2 O9 P S                       | -2.7242367   | 1.4561313    | -1.9825467 | -1.6452816  |
| 5-OXOPROLINE (CAS# 4042-36-8); (M-H   | 3.0551467    | 0.058065873  | -1.3118647 | 1.635052    |
| PHENYLALANINE (CAS# 63-91-2); (M-H    | 3.4043505    | 1.4440855    | -0.4579942 | 0.66773313  |
| BETA-MALTOSE (CAS# 69-79-4); (2M-H    | -0.5481323   | -2.3340392   | -2.3010015 | 0.39645433  |
| ETHANOLAMINE PHOSPHATE (CAS# 10       | -0.3426222   | 1.3910154    | -2.1707752 | -1.6757004  |
| C4 H13 N2 O13 P3 S3                   | -2.2978845   | 1.3079827    | -1.7711545 | -1.7726468  |
| C35 H65 Cl O7 S2                      | 0.56788373   | 0.14125377   | -1.2211764 | -1.6469743  |
| N-ACETYL-L-ASPARTIC ACID (CAS# 997-;  | 1.8603165    | 1.4621199    | -0.4907503 | -0.7146819  |
| RAFFINOSE (CAS# 512-69-6); (M+HCOO    | -1.4003133   | -0.73741144  | -0.9883542 | -0.6603539  |
| C9 H11 N O2                           | 3.4079812    | 1.4349029    | -0.4555357 | 0.6675649   |
| RIBOSE (CAS# 50-69-1); (M+Cl)-        | 1.3763602    | -0.27266714  | 0.29828027 | -0.44776523 |
| D-LYXOSE (CAS# 1114-34-7); (M+Cl)-    | 1.3755687    | -0.24668874  | 0.25733167 | -0.44380304 |
| STACHYOSE (CAS# 54261-98-2); (M-H)-   | -0.75008786  | -2.2134783   | -2.3814507 | 0.57726896  |
| C38 H66 O3 P2 S                       | -0.7809248   | 1.098153     | -0.1230399 | 0.77490896  |
| DEOXYCYTIDINE (CAS# 951-77-9); (M+H   | 0.37073976   | 0.59729105   | -0.1075587 | -0.5259298  |
| C10 H11 N5 O4                         | 2.1271493    | 2.2596009    | -0.5616673 | 1.2449476   |
| C27 H51 Cl N2 S                       | 1.1768576    | 1.2875842    | 1.1015642  | 0.54164773  |
| 2-AMINOETHYL DIHYDROGEN PHOSPH.       | -0.18139327  | 1.2145957    | -2.1127045 | -1.6194186  |
| INOSINE 5'-PHOSPHATE (CAS# 131-99-7   | 0.67928934   | 1.6374176    | 0.06710009 | -1.126957   |
| THYMINE (CAS# 65-71-4); (M-H)-        | -0.054911718 | 1.1748505    | -0.6560277 | -0.96227163 |
| MELIBIOSE (CAS# 585-99-9); (M+HCOO    | -0.7172524   | -1.317609    | 0.5270249  | 0.14474632  |
| SUCROSE (CAS# 57-50-1); (M+HCOO)-     | -0.7172524   | -1.317609    | 0.5270249  | 0.14474632  |
| BETA-MALTOSE (CAS# 69-79-4); (M+H     | -0.7172524   | -1.317609    | 0.5270249  | 0.14474632  |
| MALTOSE (CAS# 69-79-4); (M+HCOO)-     | -0.7172524   | -1.317609    | 0.5270249  | 0.14474632  |
| PALATINOSE (CAS# 343336-76-5); (M+H   | -0.7172524   | -1.317609    | 0.5270249  | 0.14474632  |
| 956.9781@0.67696446                   | 3.3467562    | -0.18338914  | 0.02788959 | 1.031241    |
| 196.8179@0.71062976                   | -1.0891166   | 1.1773318    | -1.192393  | 1.4622684   |
| 840.3183@3.597034                     | 2.1900585    | -1.5868474   | 0.33971322 | 0.702875    |

|                     |              |             |            |             |
|---------------------|--------------|-------------|------------|-------------|
| 869.2725@3.5984445  | 1.9544878    | -1.0958017  | 1.0145665  | -1.0524405  |
| 912.2129@8.460721   | 0.022381999  | -3.1902177  | -2.743192  | -0.04886967 |
| 844.225@8.460042    | 0.33208287   | -3.1830838  | -2.722464  | -0.11085244 |
| 850.2403@8.458829   | 0.20061556   | -3.217857   | -2.6983647 | -0.18776464 |
| 782.2537@8.460257   | 0.314097     | -3.226086   | -2.6483195 | -0.18052639 |
| 940.2718@13.098411  | -0.13353845  | -2.8784068  | -2.9672585 | -0.20689401 |
| 900.4308@13.097647  | 0.6348899    | -3.050573   | -2.7734802 | -0.09913378 |
| 872.2861@13.0997305 | -0.079549775 | -2.8991194  | -3.004357  | 0.029607423 |
| 968.4186@13.099865  | 0.31960583   | -3.0629203  | -2.806227  | 0.027376845 |
| 804.2994@13.099768  | 0.022713065  | -2.968541   | -2.9324558 | -0.07955468 |
| 776.1531@13.099658  | 0.05594107   | -2.9038486  | -2.7717671 | 0.009364307 |
| 844.1401@13.100767  | -0.30809265  | -2.881521   | -2.9917853 | -0.13439679 |
| 810.3161@13.099784  | 0.12894487   | -3.044302   | -2.8756657 | 0.09234719  |
| 881.2764@22.30472   | 1.7081697    | -0.9347537  | 2.3004541  | 0.47148448  |
| 813.2878@22.306946  | 2.6972022    | -0.9471585  | 2.3230674  | -0.5043928  |
| 880.3095@22.448568  | 3.8687725    | -0.36277935 | -0.6849484 | 1.1713091   |
| 766.091@22.448961   | 3.8992462    | -0.45684874 | -0.662634  | 0.93041027  |
| 772.1086@22.449924  | 3.5893073    | -0.5329904  | -0.8423203 | 1.1779503   |
| 970.0489@22.452425  | 2.788281     | -1.0421122  | -1.0268345 | 0.7888871   |
| 812.3241@22.450232  | 3.673087     | -0.2554665  | -0.2248895 | 1.7439437   |
| 834.0804@22.447712  | 3.6145983    | -0.5587164  | -0.5966486 | 1.0538888   |
| 932.3407@22.582136  | 1.2863579    | -1.0250132  | 0.5506903  | -0.9986744  |
| 796.3649@22.58109   | 1.5057782    | -1.1349977  | 0.88562137 | -0.7711449  |
| 798.126@22.58789    | 3.1536179    | -0.7741111  | -0.7365749 | -1.9058796  |
| 792.1075@22.582975  | 3.6208978    | 1.7292345   | -0.9194347 | -0.06844485 |
| 928.0811@22.579584  | 3.6845818    | 1.5040575   | -0.7843307 | -0.37809312 |
| 860.0948@22.581999  | 2.998467     | -0.89614546 | -1.2915319 | -1.377798   |
| 774.1318@22.694763  | 2.7791817    | -0.39033678 | -0.9668403 | -1.2904632  |
| 834.4263@22.703411  | 2.2129683    | -1.4327569  | 1.6031697  | -0.18877488 |
| 766.4387@22.702051  | 2.1085281    | -1.27312    | 1.5487878  | -0.2719502  |
| 932.6817@22.702452  | 1.8781075    | -1.0853288  | 1.4015499  | -0.22835481 |
| 940.3804@22.708122  | 2.9425933    | -0.98770463 | 0.78749645 | -1.6023927  |
| 872.3943@22.709047  | 2.9914136    | -1.0839386  | 0.7740195  | -1.4130586  |
| 946.3981@22.709084  | 3.014352     | -1.139599   | 0.8753128  | -1.3340961  |
| 878.4136@22.711048  | 2.3731332    | -1.6233315  | 1.2463243  | 0.23585723  |
| 810.4253@22.712088  | 2.3583963    | -1.5615793  | 1.3353026  | 0.18744993  |
| 804.4079@22.715647  | 3.47349      | -1.1182656  | 0.12986079 | -1.3147328  |
| 970.6544@22.714334  | 1.4192928    | -0.9786811  | 1.5233617  | -0.07830606 |
| 976.6711@22.716951  | 1.8877501    | -1.0955116  | 1.1994429  | 0.1466023   |
| 908.6825@22.715044  | 2.1714787    | -1.373984   | 1.0885812  | 0.115117565 |
| 854.4134@22.721003  | 2.378795     | -1.7391579  | 0.72379404 | 0.63581264  |
| 786.4252@22.721195  | 3.0263436    | -1.174768   | 0.3177324  | -1.064764   |
| 922.3991@22.722313  | 2.740062     | -0.8007166  | 0.36412114 | -1.315038   |
| 780.4092@22.723911  | 2.7675252    | -0.7880381  | 0.46156397 | -1.2943583  |
| 848.3947@22.723244  | 2.3841572    | -1.7441365  | 0.72993016 | 0.5997146   |
| 952.6676@22.725416  | 1.5197451    | -1.2996616  | 0.43120256 | 0.7814125   |
| 916.3827@22.726923  | 2.265891     | -1.6317544  | 0.57241577 | 0.4518843   |
| 990.3873@22.72658   | 1.9642484    | -1.6406319  | 0.19856367 | 0.801381    |
| 984.3693@22.730658  | 1.9239724    | -1.3203887  | 0.6924207  | 0.6742404   |
| 756.1528@22.731094  | 3.4958928    | 2.0394945   | -1.0395418 | 0.42045867  |
| 824.1386@22.73434   | 3.4757178    | 2.0092516   | -1.1562123 | 0.30932385  |
| 818.1219@22.739376  | 3.3076274    | 2.150226    | -1.13105   | 0.67949855  |
| 886.1106@22.738554  | 3.0947669    | 2.4195075   | -1.1578096 | 0.64441526  |
| 265.2973@22.820448  | -2.1175256   | 1.2330028   | -1.7018793 | -1.4064449  |
| 809.4521@22.830763  | 0.52147335   | 1.8111788   | -1.772648  | -0.85876703 |
| 815.4733@22.83448   | 1.1375315    | 1.7663093   | -2.0445967 | -0.57097083 |
| 948.6596@22.84815   | 3.6547804    | 1.1375948   | -1.0913483 | 0.36286932  |
| 806.412@22.846617   | 3.6529832    | 1.4636828   | -0.9718871 | 0.38369888  |
| 942.641@22.846617   | 3.719844     | 1.0477635   | -1.0409267 | 0.3511852   |
| 880.6714@22.84751   | 3.6665378    | 0.94151825  | -0.9165459 | 0.35590398  |
| 942.3879@22.852045  | 3.543615     | 1.7577759   | -0.8230587 | 0.49845922  |
| 874.651@22.847902   | 3.6790617    | 0.975667    | -0.8335142 | 0.47086823  |
| 874.4002@22.849009  | 3.7285056    | 1.4106778   | -0.8937885 | 0.36929625  |
| 812.683@22.848618   | 3.2869377    | 0.74809736  | -0.52048   | 0.35429478  |
| 800.3953@22.848757  | 3.7148638    | 1.4301634   | -0.8510959 | 0.49299604  |
| 868.3824@22.852972  | 3.6835322    | 1.4895113   | -0.7924866 | 0.54979837  |
| 936.3699@22.860899  | 3.4301267    | 1.7918681   | -0.5368967 | 0.8319358   |
| 800.1383@22.869429  | -1.8675253   | 0.7767363   | 0.67918056 | 0.1519914   |
| 868.1262@22.870573  | -2.037264    | 0.961534    | 0.12069397 | -0.74863803 |
| 794.1233@22.874426  | -2.6270835   | 0.4559155   | 0.24194267 | 0.006973684 |
| 862.1093@22.87621   | -2.906222    | -0.09325349 | 0.48771444 | 0.27128127  |
| 958.7182@22.927029  | 2.346265     | -1.7653129  | 0.7497993  | 0.88085884  |
| 790.4564@22.92349   | 2.8161306    | -0.7741961  | -0.007119  | -1.6276565  |
| 858.4442@22.92771   | 2.3568869    | -1.7769363  | 0.5866462  | 0.5681067   |
| 784.4399@22.926924  | 3.3720045    | -0.8325129  | -1.1000233 | -1.297993   |
| 952.7013@22.91744   | 4.0362234    | 0.2811732   | -0.6474679 | -0.13952363 |
| 852.4268@22.929146  | 3.3540618    | -0.8199158  | -1.1355582 | -1.2623713  |
| 926.4317@22.929146  | 2.9797387    | -1.0635537  | 0.09087907 | -1.2430836  |
| 890.7308@22.92085   | 3.2472174    | -0.64715457 | -1.0848534 | -1.1878681  |
| 994.4194@22.931183  | 2.9222827    | -1.1055231  | -7.48E-04  | -1.2351086  |
| 920.4147@22.931295  | 3.4001966    | -0.87939256 | -0.9799251 | -1.368845   |
| 988.4018@22.932953  | 2.8316283    | -0.86385137 | -0.0699551 | -1.5209711  |
| 914.4015@22.935183  | 2.806147     | -0.87611556 | -0.0946249 | -1.3064084  |
| 752.1517@22.943537  | 3.3158817    | 2.3390594   | -0.9962092 | 0.35687006  |
| 894.1401@22.941717  | 3.0521517    | 2.5288153   | -1.1451137 | 0.39406285  |
| 820.1395@22.945572  | 3.133228     | 2.5264304   | -1.0399643 | 0.3767922   |
| 888.126@22.948214   | 2.7707207    | 2.7009122   | -1.1523957 | 0.5061153   |
| 956.1108@22.95032   | 2.507463     | 2.9857998   | -1.1305554 | 0.38122195  |
| 888.5404@22.979513  | 2.1442363    | -1.456884   | 0.98871297 | 0.642161    |
| 370.1825@23.004324  | 0.8889497    | -0.8396027  | -1.4341081 | 0.73373854  |
| 794.4872@23.182186  | 2.6916683    | 2.1960218   | -1.4714828 | -0.02116007 |
| 924.4461@23.183435  | 2.753267     | 1.9904519   | -1.4154598 | -0.32327133 |
| 896.1574@23.18372   | 2.521339     | 2.3438091   | -1.5601429 | -0.35591725 |
| 930.4617@23.18279   | 2.4141026    | 2.2238805   | -1.5317132 | -0.12363523 |
| 992.4333@23.181005  | 2.7695417    | 2.0932882   | -1.3867326 | -0.4573291  |
| 788.4697@23.181292  | 2.634633     | 1.9908841   | -1.6579099 | -0.24798226 |
| 856.4573@23.18165   | 2.6968894    | 1.9386331   | -1.6383892 | -0.6095155  |
| 828.1705@23.183365  | 2.5410814    | 2.3783977   | -1.5018449 | -0.06214237 |
| 986.4176@23.184006  | 2.725815     | 2.4707625   | -1.4620991 | -0.15454698 |
| 760.1843@23.183365  | 2.7957447    | 2.2440722   | -1.4027956 | -0.11089879 |
| 754.167@23.181934   | 2.4010344    | 2.4143205   | -1.5805255 | -0.2655195  |
| 816.1365@23.182901  | 2.7148695    | 1.1303781   | -1.1802164 | -0.3705625  |
| 822.1552@23.183685  | 2.5761778    | 2.5576544   | -1.3562704 | -0.26250637 |
| 958.1287@23.18668   | 2.3024962    | 3.0235636   | -0.7195814 | 0.24119014  |
| 789.9837@23.188755  | 1.1122534    | 2.6309552   | -1.9552343 | 0.29624668  |

|                    |            |              |            |             |
|--------------------|------------|--------------|------------|-------------|
| 890.14@23.186148   | 2.7902093  | 1.961146     | -0.9879552 | 0.004472315 |
| 884.1239@23.18904  | 1.8954018  | 2.418368     | -0.926226  | 0.23173788  |
| 856.5126@23.707132 | 1.1522595  | -1.2308717   | 0.9794359  | 0.7981192   |
| 788.5303@23.708025 | 2.273074   | -1.7603239   | 1.5700368  | 0.7273535   |
| 814.546@23.81533   | 2.3319256  | -1.4484825   | 2.1200793  | 0.55625105  |
| 831.5205@23.83582  | 2.4581444  | -0.485129    | 2.1485999  | -1.6230053  |
| 789.9827@24.123894 | 0.59224045 | -0.31622857  | 1.1041424  | -0.22317958 |
| 878.5307@24.134247 | 3.0688303  | -1.2804655   | 1.4014521  | -0.70133036 |
| 946.519@24.131824  | 3.00773    | -1.3156025   | 1.4789046  | -0.4257806  |
| 816.5609@24.13103  | 3.31842    | -0.9773444   | -0.3639985 | -0.5740688  |
| 884.5485@24.132364 | 3.020685   | -1.3174521   | 1.3977534  | -0.5004681  |
| 952.5352@24.13251  | 3.3024411  | -0.9589317   | -0.4089395 | -0.5940883  |
| 827.5673@24.247963 | 1.4633931  | -0.8905095   | 1.7966263  | 0.8118691   |
| 895.5529@24.245691 | 1.129825   | -0.42322895  | 1.169376   | -0.11396335 |
| 774.5898@24.286057 | 2.283948   | -1.4918221   | 2.3875527  | 0.7227227   |
| 845.5383@24.346788 | 1.3007429  | -0.5986912   | 2.203786   | -0.450307   |
| 777.5507@24.352367 | 2.5754905  | -0.6715234   | 1.6003275  | -1.8282816  |
| 765.5312@24.455208 | 2.366247   | -0.6917526   | 1.3104503  | -1.5895951  |
| 963.5438@24.433931 | 1.1287508  | -0.60734487  | 1.5491254  | -0.16408297 |
| 895.5547@24.433441 | 2.8147807  | -1.0511441   | 1.8690193  | -1.2613987  |
| 827.5687@24.43402  | 2.7485108  | -1.0169368   | 2.0862148  | -1.184893   |
| 815.5134@24.467724 | 2.1343443  | -1.5515238   | 2.024865   | 0.38546708  |
| 889.5122@24.501265 | 0.96451163 | -0.7616128   | 1.7291541  | 0.18792276  |
| 803.5704@24.495302 | 2.9822412  | -1.2911123   | 1.5108417  | -0.7480018  |
| 871.5551@24.4953   | 2.9892774  | -1.3073083   | 1.4853758  | -0.7314601  |
| 939.5417@24.50164  | 3.0128822  | -1.2553009   | 1.4635365  | -0.7889416  |
| 791.5117@24.541157 | 2.8590689  | -1.2390242   | 1.8660468  | -0.8951534  |
| 853.5806@24.555206 | 2.2327566  | -1.3413191   | 2.5504413  | 0.22812697  |
| 965.5593@24.655502 | 1.4629476  | -1.1911925   | 0.7832421  | 0.44708803  |
| 897.5714@24.652512 | 2.2369125  | -1.588531    | 1.6457112  | 0.63027537  |
| 829.5868@24.66468  | 3.0397377  | -1.2764702   | 1.544624   | -0.6273167  |
| 811.5692@24.689384 | 0.8874152  | -0.41416025  | 1.9495542  | -0.44064143 |
| 817.5255@24.673075 | 3.2547455  | -0.9662762   | -5.45E-04  | -0.7027806  |
| 915.5349@24.771643 | 2.6612134  | -0.9743976   | 1.5143874  | -1.2232575  |
| 779.5681@24.801208 | 3.025343   | -0.6865655   | -0.592378  | -0.9683904  |
| 847.5537@24.80091  | 2.7924054  | -1.1469983   | 1.5103563  | -1.2109281  |
| 785.5479@24.86617  | 2.7897086  | -0.59834874  | -0.3759948 | -1.1161748  |
| 835.5342@24.885294 | 2.6807346  | -1.1692837   | 1.9615984  | -1.0846547  |
| 805.5843@24.927763 | 3.3049712  | -0.9501905   | 0.0218201  | -0.9368829  |
| 873.5701@24.92519  | 2.9465141  | -1.1865512   | 1.6273345  | -1.0261061  |
| 941.5576@24.924244 | 2.2106497  | -1.5091246   | 2.215376   | 0.21200669  |
| 811.5413@24.925144 | 1.0552349  | -0.45349148  | 2.1556537  | -0.8859757  |
| 991.5681@25.086418 | 2.5463073  | -0.7015948   | 1.8556511  | -1.206982   |
| 923.5869@25.089668 | 2.0791216  | -1.4091635   | 2.4003785  | 0.20149599  |
| 855.5999@25.083378 | 2.742302   | -1.1491451   | 2.0436087  | -0.94922197 |
| 775.5523@25.12754  | 1.8315461  | -1.0710876   | 1.715649   | 0.16746658  |
| 831.5993@25.1719   | 3.3925152  | -1.0381345   | 0.03732596 | -0.5677923  |
| 899.5875@25.17249  | 2.9078712  | -1.102896    | 1.2602537  | -0.855505   |
| 967.5749@25.17143  | 2.2546525  | -1.5001395   | 2.200879   | 0.7487425   |
| 751.5512@25.219986 | 3.2039015  | -1.0463139   | 0.5723022  | -0.8332868  |
| 819.5442@25.223696 | 2.8896432  | -1.3104205   | 1.8415899  | -1.0819948  |
| 769.5533@25.231102 | 1.99647    | -0.23317826  | 1.0814133  | -2.4579492  |
| 857.6148@25.444185 | 1.0486066  | -0.9664071   | 1.4947871  | 1.1056921   |
| 833.6146@25.746096 | 2.951666   | -1.312396    | 1.6736826  | -0.4314981  |
| 856.6719@25.828072 | 2.7140572  | -0.81502813  | 1.8851342  | -1.040928   |
| 837.2864@22.020664 | 0.6112384  | 0.6882253    | 1.1403053  | -0.7741501  |
| 769.3001@22.014704 | 1.2900038  | -0.24762452  | -0.4014926 | -0.4489029  |
| 899.2533@22.1221   | 0.70946264 | -0.102511145 | 1.9583097  | -0.5241077  |
| 769.2982@22.117897 | 3.4128485  | -0.9102787   | -0.1315216 | -1.2285619  |
| 837.2883@22.120522 | 2.7529144  | -0.9484019   | 0.9565247  | -1.1372707  |
| 905.2751@22.121227 | 3.1543503  | -0.9690533   | 0.2693466  | -1.0989394  |
| 831.2707@22.120157 | 1.7545592  | -0.42821535  | -0.3355152 | -0.59087443 |
| 793.3004@22.121735 | 0.76537824 | -0.50800335  | 1.2795419  | -0.49828726 |
| 763.2823@22.120653 | 1.8361293  | -0.97139454  | 1.8401845  | 0.27018422  |
| 973.2642@22.120821 | 1.6131082  | -0.5320046   | 2.0977957  | -0.4609074  |
| 943.2475@22.245485 | 0.35282353 | -0.4827563   | 0.22053689 | 0.007083148 |
| 813.2876@22.269299 | 2.0319698  | -0.6440108   | 1.5862168  | -0.5603868  |
| 875.258@22.252308  | 1.133638   | 0.101075076  | 1.9292003  | -1.0185883  |
| 949.2609@22.270824 | 1.436175   | -0.97311115  | 2.3694448  | 0.1918931   |
| 807.2674@22.275352 | 2.9498453  | -1.3434329   | 0.82452273 | 0.40869057  |
| 881.2784@22.259848 | 0.7693505  | -0.7084806   | 1.1909726  | 0.565338    |
| 949.2633@22.307463 | 2.0997815  | -1.0816424   | 2.6318643  | 0.2090067   |
| 807.2695@22.306526 | 3.1913     | -1.3591359   | 0.8984026  | 0.22304313  |
| 907.2904@22.43314  | 1.8215117  | -0.22980583  | 0.6531026  | -1.160067   |
| 771.3164@22.434029 | 0.79742414 | 0.15520924   | 2.084843   | -1.5174375  |
| 839.3039@22.433565 | 1.676018   | 0.15240455   | 0.8520019  | -2.2851872  |
| 975.2786@22.430065 | 0.54570156 | 0.26325703   | 0.08786926 | -0.37245733 |
| 539.3414@22.447004 | 1.9972553  | -0.9277863   | -0.5110573 | 0.894877    |
| 754.1354@22.516384 | 0.58811104 | -0.2745521   | 1.6117373  | -0.63596284 |
| 816.1082@22.516327 | 0.9334719  | -0.93448216  | 1.1578753  | 0.3287837   |
| 864.353@22.580797  | 1.4976138  | -1.0299569   | 0.8065405  | -0.69578654 |
| 896.6366@22.722181 | 1.6280437  | -1.2657478   | 0.7486628  | 0.6674617   |
| 946.6513@22.727638 | 2.3519344  | -1.6913424   | 0.7613589  | 0.52840537  |
| 884.6832@22.728521 | 2.170155   | -1.5216135   | 0.43439186 | 0.5518236   |
| 806.6577@22.847794 | 3.4726703  | 1.2762182    | -0.8680464 | 0.15657103  |
| 902.6853@22.925789 | 2.3789325  | -1.7937632   | 0.5410308  | 0.6827415   |
| 758.1685@22.93772  | 3.4966457  | 2.0736535    | -1.0496345 | 0.2042259   |
| 826.1555@22.940037 | 3.3623307  | 2.2709084    | -1.0165875 | 0.26617265  |
| 592.4751@23.119793 | 1.2074602  | -0.56532675  | 1.6840664  | -0.15116045 |
| 933.7588@23.180662 | 2.5003383  | -0.034522276 | -1.6032765 | -1.7273438  |
| 862.4753@23.181692 | 2.5113587  | 1.8275985    | -1.346022  | -0.14990336 |
| 998.4517@23.18197  | 2.5667963  | 1.9118931    | -1.7749996 | -0.35046571 |
| 789.9832@23.233425 | 2.2080767  | 2.178063     | -1.65644   | 0.83039665  |
| 882.5337@23.808203 | 1.2494435  | -0.9015022   | 2.2247066  | 0.50256777  |
| 950.5183@23.81049  | 0.73598146 | -0.55229694  | 1.4989758  | 0.33735016  |
| 775.5406@23.993422 | 1.8758539  | -1.1054949   | 2.3442304  | 0.32806975  |
| 801.5529@24.113777 | 1.830056   | -1.0489786   | 1.945245   | 0.6339266   |
| 851.5676@24.191595 | 1.635064   | -0.7354381   | 1.8591878  | 0.23299515  |
| 789.5494@24.23396  | 1.7775589  | -1.1868461   | 2.4465344  | 0.6663312   |
| 910.5611@24.28466  | 0.5111861  | -0.014904652 | 1.2296193  | -0.7682091  |
| 842.5799@24.28314  | 1.091671   | -0.71226335  | 2.3277836  | 0.11710778  |
| 913.5176@24.37286  | 1.1508628  | -0.7084743   | 1.8894682  | -0.02618142 |
| 933.5284@24.497889 | 1.8423501  | -1.1115621   | 1.9611728  | 0.7172562   |
| 773.5369@24.573845 | 2.073523   | -1.340006    | 2.352433   | -0.06312627 |
| 935.5416@24.914215 | 1.0285819  | -0.4894974   | 1.3270802  | -0.50698495 |

|                     |            |              |            |             |
|---------------------|------------|--------------|------------|-------------|
| 839.6043@24.974514  | 0.7283281  | -0.30403247  | 1.3670301  | -0.57806575 |
| 843.5413@25.124508  | 1.1668262  | -1.199839    | 1.050261   | 0.9478682   |
| 961.5559@25.16651   | 0.68871784 | -0.17217381  | 1.6120752  | -0.00139126 |
| 881.6139@25.22479   | 0.38558304 | -0.34101444  | 0.08507155 | -0.50459707 |
| 793.4574@25.23036   | 2.8708746  | -1.1845917   | 0.25916213 | -0.6618521  |
| 969.5907@25.74866   | 2.2552888  | -1.4497703   | 1.9329566  | 0.107786566 |
| 924.65@25.827486    | 0.5580062  | 0.028261334  | 1.4675771  | -0.8748904  |
| 795.4708@25.864923  | 1.5155058  | -1.0334272   | 2.2476504  | 0.71917695  |
| 954.0963@22.742481  | 2.9888196  | 2.350159     | -1.5029973 | 0.41693407  |
| 862.3615@22.861217  | 2.7874026  | 1.3539507    | 0.15748116 | 0.6619983   |
| 930.3513@22.86497   | 2.1215355  | 1.2176869    | -0.0152411 | 0.21421528  |
| 930.0965@22.88042   | -3.228695  | 0.6066448    | 0.673212   | -0.21245307 |
| 961.7809@0.58430463 | -2.5256412 | 1.4464154    | -1.2815484 | -0.48902854 |
| 757.8295@0.5829288  | -3.0090978 | 1.1990908    | -1.6572148 | -1.4544667  |
| 877.4398@22.829332  | -1.1810817 | 1.9093014    | -2.233653  | -0.741784   |
| 785.5021@8.227946   | 2.81243    | -0.5312158   | -0.5013751 | 0.65942353  |
| 913.5596@8.419434   | 2.038636   | -0.804615    | -0.2539244 | -0.92881036 |
| 896.534@10.775598   | 2.246083   | -0.40485787  | -0.0810043 | 0.85411334  |
| 663.4302@22.925947  | 2.6094558  | -0.5772535   | 0.22271779 | -1.6341788  |
| 847.5115@23.699986  | 1.9492834  | -0.06460884  | 1.027059   | -2.2534122  |
| 757.5168@24.177675  | 1.3515184  | -0.071332924 | 0.84238005 | -2.464288   |
| 927.4878@24.544098  | 2.0236948  | -1.4574355   | 2.3153172  | 0.3338536   |
| 859.5004@24.543152  | 2.212604   | -1.5861452   | 2.2090855  | 0.3069129   |
| 776.602@24.71119    | 2.95689    | -1.4357938   | 1.6190119  | -0.14453822 |
| 468.2923@24.718874  | 2.6529431  | -1.6005896   | 1.0697277  | 0.6499005   |
| 843.6809@24.930634  | 0.766864   | 0.74191284   | 0.14833143 | -3.0850074  |
| 799.5634@25.208157  | 2.4171739  | -1.3538      | 1.7213937  | -0.27473113 |
| 813.5792@25.59589   | 0.6696962  | 0.398955     | 0.7429771  | -2.61773    |
| 787.5625@25.745083  | 2.6718237  | -1.5932572   | 0.934761   | 0.2589292   |
| 783.5687@25.759329  | 2.487403   | -1.0151049   | 0.7648806  | -0.99597365 |
| 827.5949@26.126913  | 1.8077592  | -0.46339506  | 1.7770569  | -1.0898242  |
| 801.58@26.247076    | 2.5116851  | -1.5409918   | 0.97820956 | 0.4653167   |
| 797.5844@26.244934  | 3.0126388  | 2.2114964    | -1.0417974 | 0.26254725  |
| 841.611@26.701244   | 2.7694674  | 2.2201946    | -0.7987304 | -0.15751523 |
| 815.5943@26.812017  | 2.4930744  | -0.8802595   | 1.2812172  | -0.98681927 |
| 785.5833@26.954992  | 2.9385805  | -1.621149    | 0.80106246 | 0.00804019  |
| 825.6151@27.624212  | 2.6576986  | -0.9506966   | 1.6854106  | -1.1674052  |
| 799.5993@27.654818  | 3.1721778  | 1.9643546    | 0.41535795 | 0.55599797  |
| 843.6257@28.317738  | 2.443873   | -0.9069643   | 1.5071884  | -0.81907094 |
| 789.9851@23.19702   | 0.9412526  | 2.6946144    | -1.9768845 | 0.19489105  |
| 789.9816@24.124975  | 0.37633434 | 0.003478564  | 1.0384696  | -0.27442682 |
| 937.5204@24.107702  | 1.0492412  | -0.5822      | 1.6592095  | 0.53890634  |
| 830.6569@25.71992   | 0.83657897 | -0.5677902   | 1.6846983  | -0.05059464 |
| 706.3872@22.69812   | 2.5034647  | -0.640932    | 0.48827058 | -2.0155487  |
| 877.8291@0.5838698  | -1.0956798 | -1.2094401   | 1.536253   | 1.776073    |
| 809.843@0.58403724  | -1.5921689 | -1.1082673   | 1.2649515  | 1.6045239   |
| 945.8182@0.58300024 | -0.6651891 | -1.417275    | 1.5314808  | 2.151705    |
| 893.8083@0.5906194  | -2.5894294 | 1.1239344    | -1.5489801 | -0.87924695 |
| 825.8165@0.5850002  | -2.9487538 | 0.77056485   | -1.8279295 | -1.3026098  |
| 841.7887@0.5935558  | -1.3053546 | 1.5335566    | -2.1048706 | -1.1856056  |
| 745.5704@23.833296  | 1.4731804  | -0.18391214  | 0.53492785 | -1.4716289  |

| Compound                                          | p        | p (Corr)   | FC ([Healthy] vs [Lesional]) | Log FC ([Healthy] vs [Lesional]) | FC (abs) ([Healthy] vs [Lesional]) | Regulation ([Healthy] vs [Lesional]) | FC ([Healthy] vs [Nonlesional]) | Log FC ([Healthy] vs [Nonlesional]) | FC (abs) ([Healthy] vs [Nonlesional]) | Regulation ([Healthy] vs [Nonlesional]) | FC ([Lesional] vs [Nonlesional]) | Log FC ([Lesional] vs [Nonlesional]) | FC (abs) ([Lesional] vs [Nonlesional]) | Regulation ([Lesional] vs [Nonlesional]) |
|---------------------------------------------------|----------|------------|------------------------------|----------------------------------|------------------------------------|--------------------------------------|---------------------------------|-------------------------------------|---------------------------------------|-----------------------------------------|----------------------------------|--------------------------------------|----------------------------------------|------------------------------------------|
| C32 H47 N O5                                      | 0        | 0          | 6.0151615                    | 2.5886035                        | 6.0151615                          | up                                   | -101.709                        | -6.6683035                          | 101.709                               | down                                    | -611.79626                       | -9.256907                            | 611.79626                              | down                                     |
| TRANS-ACONITATE (CAS# 4023-65-8); (M-H)-          | 0        | 0          | -40.634403                   | -5.34463                         | 40.634403                          | down                                 | -3731.4768                      | -11.865531                          | 3731.4768                             | down                                    | -91.83048                        | -6.520901                            | 91.83048                               | down                                     |
| C3 H10 N8                                         | 0        | 0          | -607.7184                    | -9.247259                        | 607.7184                           | down                                 | -1.6517838                      | -0.7240249                          | 1.6517838                             | down                                    | 367.91644                        | 8.523234                             | 367.91644                              | up                                       |
| CORTISONE (CAS# 53-06-5); (M+Cl)-                 | 0        | 0          | 16.09224                     | 4.008293                         | 16.09224                           | up                                   | -22.195982                      | -4.4722266                          | 22.195982                             | down                                    | -357.18317                       | -8.48052                             | 357.18317                              | down                                     |
| C25 H53 N8 P                                      | 0        | 0          | 752.5651                     | 9.555673                         | 752.5651                           | up                                   | 2.5488894                       | 1.3498688                           | 2.5488894                             | up                                      | -295.25217                       | -8.205804                            | 295.25217                              | down                                     |
| C6 H10 N6 O4                                      | 0        | 0          | 20.724504                    | 4.3732657                        | 20.724504                          | up                                   | -86.65577                       | -6.437224                           | 86.65577                              | down                                    | -1795.898                        | -10.81049                            | 1795.898                               | down                                     |
| C40 H46 O2                                        | 0        | 0          | 24.019806                    | 4.59E+00                         | 24.019806                          | up                                   | -16.039324                      | -4.0035415                          | 16.039324                             | down                                    | -385.26144                       | -8.589694                            | 385.26144                              | down                                     |
| C31 H46 N4 O                                      | 0        | 0          | 328.15628                    | 8.358239                         | 328.15628                          | up                                   | 2.0338306                       | 1.0241995                           | 2.0338306                             | up                                      | -161.34888                       | -7.3340397                           | 161.34888                              | down                                     |
| C28 H44 Cl N10 P S3                               | 0        | 0          | 169.85263                    | 7.4081397                        | 169.85263                          | up                                   | -31.727089                      | -4.9876432                          | 31.727089                             | down                                    | -5388.9277                       | -12.395782                           | 5388.9277                              | down                                     |
| CORTISOL (CAS# 50-23-7); (M+Cl)-                  | 0        | 0          | 15.776621                    | 3.9797163                        | 15.776621                          | up                                   | -67.005646                      | -6.0662107                          | 67.005646                             | down                                    | -1057.1227                       | -10.045927                           | 1057.1227                              | down                                     |
| C24 H49 Cl N8                                     | 0        | 0          | 1361.6079                    | 10.411096                        | 1361.6079                          | up                                   | 15.147483                       | 3.9210062                           | 15.147483                             | up                                      | -89.890045                       | -6.4900894                           | 89.890045                              | down                                     |
| C28 H55 N3 P2 S                                   | 0        | 0          | 271.41852                    | 8.084375                         | 271.41852                          | up                                   | 2.255019                        | 1.1731396                           | 2.255019                              | up                                      | -120.36201                       | -6.9112363                           | 120.36201                              | down                                     |
| 4-ACETAMINOPHEN SULFATE (CAS# 32113-41-0); (M-H)- | 0        | 0          | -98.3999                     | -6.620585                        | 98.3999                            | down                                 | 46.430477                       | 5.537                               | 46.430477                             | up                                      | 4568.7544                        | 12.157585                            | 4568.7544                              | up                                       |
| C32 H59 Cl N2 O                                   | 0        | 0          | 1199.326                     | 10.228008                        | 1199.326                           | up                                   | 8.959474                        | 3.163414                            | 8.959474                              | up                                      | -133.86122                       | -7.0645923                           | 133.86122                              | down                                     |
| C39 H33 N9                                        | 0        | 0          | 63.909866                    | 5.997967                         | 63.909866                          | up                                   | -74.969574                      | -6.2282333                          | 74.969574                             | down                                    | -4791.2954                       | -12.2262                             | 4791.2954                              | down                                     |
| C28 H38 N4                                        | 0        | 0          | 483.1842                     | 8.9164295                        | 483.1842                           | up                                   | 3.6845436                       | 1.8814859                           | 3.6845436                             | up                                      | -131.13818                       | -7.034944                            | 131.13818                              | down                                     |
| CITRULLINE (CAS# 372-75-8); (M-H)-                | 0.00E+00 | 0.00E+00   | 9.98E+03                     | 13.285395                        | 9983.947                           | up                                   | 67.19895                        | 6.070367                            | 67.19895                              | up                                      | -148.57297                       | -7.215028                            | 148.57297                              | down                                     |
| C20 H20 N10 O2                                    | 0        | 0          | 1385.2249                    | 10.4359045                       | 1385.2249                          | up                                   | 1.0733435                       | 0.10211182                          | 1.0733435                             | up                                      | -1290.57                         | -10.333793                           | 1290.57                                | down                                     |
| C38 H47 N O P2 S                                  | 0        | 0          | 65.65039                     | 6.0367317                        | 65.65039                           | up                                   | -4.0038333                      | -2.0013819                          | 4.0038333                             | down                                    | -262.8532                        | -8.038114                            | 262.8532                               | down                                     |
| C30 H64 N10 S                                     | 0        | 0          | 1857.4663                    | 10.85912                         | 1857.4663                          | up                                   | 9.356867                        | 3.2260256                           | 9.356867                              | up                                      | -198.51364                       | -7.6330943                           | 198.51364                              | down                                     |
| C28 H52 O4                                        | 0        | 0          | 410.80884                    | 8.682323                         | 410.80884                          | up                                   | 91.90448                        | 6.5220633                           | 91.90448                              | up                                      | -4.4699545                       | -2.1602602                           | 4.4699545                              | down                                     |
| C40 H50 N3 O2 P3                                  | 0        | 0          | -1237.6804                   | -10.273423                       | 1237.6804                          | down                                 | -724.7176                       | -9.501275                           | 724.7176                              | down                                    | 1.7078108                        | 0.77214813                           | 1.7078108                              | up                                       |
| C25 H49 N2 O2 P                                   | 0        | 0          | 1404.7128                    | 10.456059                        | 1404.7128                          | up                                   | 2.3544726                       | 1.235404                            | 2.3544726                             | up                                      | -596.61456                       | -9.220655                            | 596.61456                              | down                                     |
| 16:0-18:0 PC (CAS# 59403-51-9); (M+Cl)-           | 0        | 0          | -697.8128                    | -9.446696                        | 697.8128                           | down                                 | 1.0051904                       | 0.0074687                           | 1.0051904                             | up                                      | 701.43445                        | 9.4541645                            | 701.43445                              | up                                       |
| L-ARGININE (CAS# 74-79-3); (M-H)-                 | 0        | 0          | 4314.726                     | 12.075053                        | 4314.726                           | up                                   | 1.2211839                       | 0.2882805                           | 1.2211839                             | up                                      | -3533.232                        | -11.786773                           | 3533.232                               | down                                     |
| C5 H11 N O3 S2                                    | 0        | 0          | 222.51262                    | 7.7977433                        | 222.51262                          | up                                   | -102.17576                      | -6.674909                           | 102.17576                             | down                                    | -22735.395                       | -14.472652                           | 22735.395                              | down                                     |
| C9 H14 N2 O5                                      | 0        | 0          | 6044.9106                    | 12.561505                        | 6044.9106                          | up                                   | -5.7155433                      | -2.5148907                          | 5.7155433                             | down                                    | -34549.95                        | -15.076396                           | 34549.95                               | down                                     |
| DEOXYCYTIDINE (CAS# 951-77-9); (M-H)-             | 0        | 0          | 4.9410067                    | 2.304805                         | 4.9410067                          | up                                   | -524.29083                      | -9.034224                           | 524.29083                             | down                                    | -2590.5242                       | -11.339028                           | 2590.5242                              | down                                     |
| C13 H3 N2 O5 P                                    | 0        | 0          | 4.80E+01                     | 5.585479                         | 48.01718                           | up                                   | -268.6656                       | -8.069668                           | 268.6656                              | down                                    | -12900.564                       | -13.655147                           | 12900.564                              | down                                     |
| C28 H14 N2                                        | 0        | 0          | 4030.9119                    | 11.976891                        | 4030.9119                          | up                                   | 26.264454                       | 4.7150397                           | 26.264454                             | up                                      | -153.47404                       | -7.261851                            | 153.47404                              | down                                     |
| 5'-DEOXYADENOSINE (CAS# 4754-39-6); (M+HCOO)-     | 0        | 0          | -1420.9368                   | -10.472627                       | 1420.9368                          | down                                 | 2.2864847                       | 1.1931312                           | 2.2864847                             | up                                      | 3248.9507                        | 11.665728                            | 3248.9507                              | up                                       |
| RIBOFLAVIN (CAS# 83-88-5); (M-H)-                 | 0        | 0          | 70.943665                    | 6.148602                         | 70.943665                          | up                                   | -5.2962356                      | -2.4049673                          | 5.2962356                             | down                                    | -375.7345                        | -8.55357                             | 375.7345                               | down                                     |
| C11 H13 N3 O5                                     | 0        | 0          | 2836.701                     | 11.469998                        | 2836.701                           | up                                   | -2.4566298                      | -1.2966805                          | 2.4566298                             | down                                    | -6968.724                        | -12.766679                           | 6968.724                               | down                                     |
| C6 H13 N3 O3                                      | 0        | 0          | 10496.448                    | 13.357614                        | 10496.448                          | up                                   | 69.7124                         | 6.1233435                           | 69.7124                               | up                                      | -150.56787                       | -7.23427                             | 150.56787                              | down                                     |
| RAFFINOSE (CAS# 512-69-6); (M+HCOO)-              | 0        | 0          | 196.22076                    | 7.616334                         | 196.22076                          | up                                   | 20.121296                       | 4.3306513                           | 20.121296                             | up                                      | -9.751894                        | -3.2856824                           | 9.751894                               | down                                     |
| INOSINE 5'-PHOSPHATE (CAS# 131-99-7); (M-H)-      | 0.00E+00 | 0.00E+00   | -200.24379                   | -7.6456137                       | 200.24379                          | down                                 | 3.3007457                       | 1.722792                            | 3.3007457                             | up                                      | 660.9537                         | 9.368405                             | 660.9537                               | up                                       |
| THYMINE (CAS# 65-71-4); (M-H)-                    | 0        | 0          | -186.24103                   | -7.541027                        | 186.24103                          | down                                 | 3.9313722                       | 1.9750329                           | 3.9313722                             | up                                      | 732.1827                         | 9.51606                              | 732.1827                               | up                                       |
| MELIBIOSE (CAS# 585-99-9); (M+HCOO)-              | 0        | 0          | -76.41781                    | -6.255837                        | 76.41781                           | down                                 | 21.05834                        | 4.39632                             | 21.05834                              | up                                      | 1609.2322                        | 10.652157                            | 1609.2322                              | up                                       |
| SUCROSE (CAS# 57-50-1); (M+HCOO)-                 | 0        | 0          | -76.41781                    | -6.255837                        | 76.41781                           | down                                 | 21.05834                        | 4.39632                             | 21.05834                              | up                                      | 1609.2322                        | 10.652157                            | 1609.2322                              | up                                       |
| BETA-MALTOSE (CAS# 69-79-4); (M+HCOO)-            | 0        | 0          | -76.41781                    | -6.255837                        | 76.41781                           | down                                 | 21.05834                        | 4.39632                             | 21.05834                              | up                                      | 1609.2322                        | 10.652157                            | 1609.2322                              | up                                       |
| MALTOSE (CAS# 69-79-4); (M+HCOO)-                 | 0        | 0          | -76.41781                    | -6.255837                        | 76.41781                           | down                                 | 21.05834                        | 4.39632                             | 21.05834                              | up                                      | 1609.2322                        | 10.652157                            | 1609.2322                              | up                                       |
| PALATINOSE (CAS# 343336-76-5); (M+HCOO)-          | 0        | 0          | -76.41781                    | -6.255837                        | 76.41781                           | down                                 | 21.05834                        | 4.39632                             | 21.05834                              | up                                      | 1609.2322                        | 10.652157                            | 1609.2322                              | up                                       |
| 869.2725@3.5984445                                | 0        | 0          | 1292.4371                    | 10.335878                        | 1292.4371                          | up                                   | -7.8322153                      | -2.9694204                          | 7.8322153                             | down                                    | -10122.639                       | -13.305298                           | 10122.639                              | down                                     |
| 789.9827@24.123894                                | 0.00E+00 | 0.00E+00   | 25.66566                     | 4.6817675                        | 25.66566                           | up                                   | -27.966011                      | -4.8056026                          | 27.966011                             | down                                    | -717.76636                       | -9.4873705                           | 717.76636                              | down                                     |
| 895.5529@24.245691                                | 0        | 0          | 7.057112                     | 2.819078                         | 7.057112                           | up                                   | -139.88445                      | -7.128092                           | 139.88445                             | down                                    | -9.94717                         | -9.94717                             | 9.94717                                | down                                     |
| 811.5692@24.689384                                | 0        | 0          | 111.66578                    | 6.8030434                        | 111.66578                          | up                                   | -8.798099                       | -3.1371918                          | 8.798099                              | down                                    | -982.4466                        | -9.940235                            | 982.4466                               | down                                     |
| 811.5413@24.925144                                | 0        | 0          | 1461.788                     | 10.513518                        | 1461.788                           | up                                   | -1.5356513                      | -0.6188507                          | 1.5356513                             | down                                    | -2244.7966                       | -11.132369                           | 2244.7966                              | down                                     |
| 899.2533@22.1221                                  | 0        | 0          | 216.52953                    | 7.75842                          | 216.52953                          | up                                   | 2.8784258                       | 1.52528                             | 2.8784258                             | up                                      | -75.22498                        | -6.23314                             | 75.22498                               | down                                     |
| 907.2904@22.43314                                 | 0        | 0          | -182.8187                    | -7.51427                         | 182.8187                           | down                                 | -14.052855                      | -3.8127913                          | 14.052855                             | down                                    | 13.009363                        | 3.7014785                            | 13.009363                              | up                                       |
| 754.1354@22.516384                                | 0        | 0          | 751.34534                    | 9.553332                         | 751.34534                          | up                                   | 2.9099622                       | 1.5410004                           | 2.9099622                             | up                                      | -258.19763                       | -8.012332                            | 258.19763                              | down                                     |
| 950.5183@23.81049                                 | 0        | 0          | 21.94982                     | 4.456137                         | 21.94982                           | up                                   | -20.267328                      | -4.341084                           | 20.267328                             | down                                    | -444.8642                        | -8.797221                            | 444.8642                               | down                                     |
| 910.5611@24.28466                                 | 0        | 0          | 189.93138                    | 7.5693345                        | 189.93138                          | up                                   | -4.8240633                      | -2.270249                           | 4.8240633                             | down                                    | -916.241                         | -9.839583                            | 916.241                                | down                                     |
| 935.5416@24.914215                                | 0        | 0          | 4.970205                     | 2.3133054                        | 4.970205                           | up                                   | -115.381714                     | -6.8502707                          | 115.381714                            | down                                    | -573.47076                       | -9.163576                            | 573.47076                              | down                                     |
| 839.6043@24.974514                                | 0        | 0          | 81.30709                     | 6.3453093                        | 81.30709                           | up                                   | -7.881576                       | -2.9784842                          | 7.881576                              | down                                    | -640.828                         | -9.323793                            | 640.828                                | down                                     |
| 961.5559@25.16651                                 | 0        | 0          | 87.6141                      | 6.453091                         | 87.6141                            | up                                   | -6.804868                       | -2.7665672                          | 6.804868                              | down                                    | -596.2022                        | -9.219658                            | 596.2022                               | down                                     |
| 881.6139@25.22479                                 | 0        | 0          | 4.3001857                    | 2.10E+00                         | 4.3001857                          | up                                   | -162.23013                      | -7.341898                           | 162.23013                             | down                                    | -697.61957                       | -9.446297                            | 697.61957                              | down                                     |
| 924.65@25.827486                                  | 0        | 0          | 704.42365                    | 9.4602995                        | 704.42365                          | up                                   | -6.8642693                      | -2.7791061                          | 6.8642693                             | down                                    | -4835.3535                       | -12.239406                           | 4835.3535                              | down                                     |
| 789.9816@24.124975                                | 0.00E+00 | 0.00E+00   | 4.4986563                    | 2.1694942                        | 4.4986563                          | up                                   | -153.73245                      | -7.264278                           | 153.73245                             | down                                    | -691.5895                        | -9.433772                            | 691.5895                               | down                                     |
| 830.6569@25.71992                                 | 0        | 0          | 148.28773                    | 7.2122555                        | 148.28773                          | up                                   | -2.6691446                      | -2.6691446                          | 6.3605194                             | down                                    | -943.1871                        | -9.8814                              | 943.1871                               | down                                     |
| 745.5704@23.833296                                | 0        | 0          | -684.1071                    | -9.418078                        | 684.1071                           | down                                 | -5.513754                       | -2.4630349                          | 5.513754                              | down                                    | 124.07286                        | 6.955044                             | 124.07286                              | up                                       |
| C8 H12 O18 P2 S3                                  | 1.31E-04 | 0.03453444 | -1.892657                    | -0.920413                        | 1.892657                           | down                                 | 1.4359629                       | 0.52201843                          | 1.4359629                             | up                                      | 2.7177851                        | 1.4424314                            | 2.7177851                              | up                                       |
| HEXACOSANOIC ACID (CAS# 506-46-7); (M-H)-         | 2.33E-04 | 0.03453444 | 5.1831627                    | 2.37E+00                         | 5.1831627                          | up                                   | -5.4293256                      | -2.440773                           | 5.4293256                             |                                         |                                  |                                      |                                        |                                          |

|                                                     |             |             |            |             |           |      |            |             |           |      |            |              |           |      |
|-----------------------------------------------------|-------------|-------------|------------|-------------|-----------|------|------------|-------------|-----------|------|------------|--------------|-----------|------|
| C17 H20 N10 O12 P4                                  | 0.003105738 | 0.043720596 | 1.1644766  | 0.21968174  | 1.1644766 | up   | 1.179104   | 0.23769093  | 1.179104  | up   | 1.0125612  | 0.018009186  | 1.0125612 | up   |
| C15 H15 N9 O                                        | 0.002140158 | 0.043720596 | 1.4677216  | 0.5535784   | 1.4677216 | up   | 1.2524258  | 0.32472515  | 1.2524258 | up   | -1.171903  | -0.22885323  | 1.171903  | down |
| C22 H17 N6 O5 P                                     | 0.002475691 | 0.043720596 | 1.367915   | 0.45197868  | 1.367915  | up   | 1.2658144  | 0.34006596  | 1.2658144 | up   | -1.08066   | -0.11191273  | 1.08066   | down |
| EPIBRASSINOLIDE [ISTD] (CAS# 78821-43-9); (M+HCOO)- | 0.001793256 | 0.043720596 | 1.4215956  | 0.50751114  | 1.4215956 | up   | 1.3150927  | 0.3951645   | 1.3150927 | up   | -1.0809851 | -0.11234665  | 1.0809851 | down |
| GIBBERELIC ACID [ISTD] (CAS# 77-06-5); (M-H)-       | 0.00195093  | 0.043720596 | 1.4352207  | 0.52127266  | 1.4352207 | up   | 1.3358985  | 0.41781044  | 1.3358985 | up   | -1.0743486 | -0.10346222  | 1.0743486 | down |
| N-ACETYL GALACTOSAMINE (CAS# 1811-31-0); (M+Cl)-    | 0.003196951 | 0.043720596 | -2.2835908 | -1.1913042  | 2.2835908 | down | -11.127444 | -3.4760504  | 11.127444 | down | -4.8727837 | -2.2847462   | 4.8727837 | down |
| C24 H24 N4 O4                                       | 0.00271407  | 0.043720596 | 1.25E+00   | 0.32394028  | 1.2517446 | up   | 1.0022553  | 0.003250122 | 1.0022553 | up   | -1.2489278 | -0.32069016  | 1.2489278 | down |
| C15 H18 N6 P2                                       | 2.40E-03    | 0.043720596 | 1.211943   | 0.27732182  | 1.211943  | up   | 1.1319791  | 0.17884731  | 1.1319791 | up   | -1.0706408 | -0.0984745   | 1.0706408 | down |
| EPIBRASSINOLIDE [ISTD] (CAS# 78821-43-9); (M+Cl)-   | 0.001535118 | 0.043720596 | 1.4933105  | 0.5785141   | 1.4933105 | up   | 1.3747592  | 0.45917892  | 1.3747592 | up   | -1.0862342 | -0.119335175 | 1.0862342 | down |
| C10 H13 Cl N6 O                                     | 0.00236889  | 0.043720596 | 1.3362465  | 0.4181862   | 1.3362465 | up   | 1.2842038  | 0.36087418  | 1.2842038 | up   | -1.0405253 | -0.05731201  | 1.0405253 | down |
| C26 H50 N6 O2                                       | 0.003263773 | 0.043720596 | 1.042349   | 0.059838295 | 1.042349  | up   | -3.582591  | -1.8410034  | 3.582591  | down | -3.7343102 | -1.9008417   | 3.7343102 | down |
| C23 H26 N10                                         | 0.002923816 | 0.043720596 | 1.9552897  | 0.96738243  | 1.9552897 | up   | 1.7499456  | 0.8073101   | 1.7499456 | up   | -1.1173432 | -0.16007233  | 1.1173432 | down |
| C18 H13 Cl N10                                      | 0.001458273 | 0.043720596 | 1.409781   | 0.495471    | 1.409781  | up   | 1.286594   | 0.36355686  | 1.286594  | up   | -1.0957465 | -0.13191414  | 1.0957465 | down |
| C9 H19 N4 O4 P                                      | 3.49E-03    | 0.043720596 | 1.3068496  | 0.38609314  | 1.3068496 | up   | 1.2524813  | 0.32478905  | 1.2524813 | up   | -1.0434085 | -0.061304092 | 1.0434085 | down |
| C6 H10 O3                                           | 0.002684098 | 0.043720596 | 1.0970178  | 0.13358688  | 1.0970178 | up   | -13.323462 | -3.735897   | 13.323462 | down | -14.616075 | -3.869484    | 14.616075 | down |
| C34 H29 Cl N6                                       | 0.003549906 | 0.043720596 | 1.537127   | 0.6202364   | 1.537127  | up   | 1.5362941  | 0.6194544   | 1.5362941 | up   | -1.0005422 | -7.82E-04    | 1.0005422 | down |
| C29 H44 N4 O3                                       | 0.001303842 | 0.043720596 | 1.4619148  | 0.5478592   | 1.4619148 | up   | 1.3426979  | 0.42513466  | 1.3426979 | up   | -1.0887891 | -0.12272453  | 1.0887891 | down |
| C30 H50 O17                                         | 0.003302497 | 4.37E-02    | -5.220302  | -2.3841333  | 5.220302  | down | -2.3947885 | -1.2598982  | 2.3947885 | down | 2.1798594  | 1.1242352    | 2.1798594 | up   |
| C26 H34 N6 O P2                                     | 0.003259051 | 0.043720596 | 1.7522734  | 0.80922794  | 1.7522734 | up   | 1.3760393  | 0.4605217   | 1.3760393 | up   | -1.2734182 | -0.34870625  | 1.2734182 | down |
| C38 H55 O P5 S                                      | 0.002109765 | 0.043720596 | 2.2232127  | 1.1526461   | 2.2232127 | up   | 1.982698   | 0.9874649   | 1.982698  | up   | -1.1213069 | -0.16518116  | 1.1213069 | down |
| LIGNOCERIC ACID (CAS# 557-59-5); (M-H)-             | 0.003620581 | 0.043720596 | 6.6391826  | 2.7310057   | 6.6391826 | up   | -8.241286  | -3.0428696  | 8.241286  | down | -5.71541   | -5.71541     | 5.71541   | down |
| C12 H18 O3                                          | 0.001945627 | 0.043720596 | 1.4243855  | 0.51033974  | 1.4243855 | up   | 1.2972339  | 0.3754387   | 1.2972339 | up   | -1.0980175 | -0.13490105  | 1.0980175 | down |
| C9 H17 N O4                                         | 9.26E-04    | 0.043720596 | -1.4631774 | -0.5491047  | 1.4631774 | down | -24.435804 | -4.6109247  | 24.435804 | down | -16.700508 | -4.06182     | 16.700508 | down |
| C24 H48 O2                                          | 0.003672949 | 0.043720596 | 6.60276    | 2.7230692   | 6.60276   | up   | -8.188266  | -3.038558   | 8.188266  | down | -5.065615  | -5.756627    | 5.065615  | down |
| C30 H54 O3 S2                                       | 6.63E-04    | 0.043720596 | 1.4735292  | 0.5592756   | 1.4735292 | up   | 1.3519809  | 0.4350748   | 1.3519809 | up   | -1.0899038 | -0.12420082  | 1.0899038 | down |
| C7 H9 N4 O6 P3 S2                                   | 5.89E-04    | 0.043720596 | -1.6916459 | -0.7584276  | 1.6916459 | down | 1.252887   | 0.32525635  | 1.252887  | up   | 2.1194413  | 1.083684     | 2.1194413 | up   |
| C23 H43 N O4 P2 S                                   | 0.003449571 | 0.043720596 | 2.783075   | 1.4766798   | 2.783075  | up   | -1.2603898 | -0.33386993 | 1.2603898 | down | -3.5077593 | -1.8105497   | 3.5077593 | down |
| C39 H40 N9 O4 P                                     | 0.002764458 | 0.043720596 | 2.4595757  | 1.2984095   | 2.4595757 | up   | 1.5783547  | 0.6584215   | 1.5783547 | up   | -1.5583161 | -0.63998795  | 1.5583161 | down |
| GLUCOSE (CAS# 50-99-7); (M+Cl)-                     | 0.003296553 | 0.043720596 | 3.2809014  | 1.7140923   | 3.2809014 | up   | -1.2900916 | -0.3674736  | 1.2900916 | down | -4.2326636 | -2.0815659   | 4.2326636 | down |
| D-PSICOSE (CAS# 551-68-8); (M+Cl)-                  | 0.003301379 | 0.043720596 | 3.2809014  | 1.7140923   | 3.2809014 | up   | -1.2900507 | -0.36742783 | 1.2900507 | down | -4.232529  | -2.08152     | 4.232529  | down |
| C6 H13 Cl O6                                        | 0.003242508 | 0.043720596 | 3.2962577  | 1.720829    | 3.2962577 | up   | -1.29038   | -0.36779594 | 1.29038   | down | -4.2534246 | -2.088625    | 4.2534246 | down |
| C28 H28 N2 O15                                      | 6.44E-04    | 0.043720596 | 4.8455453  | 2.28E+00    | 4.8455453 | up   | -171.62021 | -7.4230757  | 171.62021 | down | -831.5935  | -9.699735    | 831.5935  | down |
| C25 H48 P2 S3                                       | 0.002629078 | 0.043720596 | 2.7910192  | 1.480792    | 2.7910192 | up   | -1.3938658 | -0.47909164 | 1.3938658 | down | -3.8903062 | -1.9598837   | 3.8903062 | down |
| C19 H16 N10 O8 S                                    | 0.003308749 | 0.043720596 | 1.2939247  | 0.3717537   | 1.2939247 | up   | 1.2652665  | 0.3394413   | 1.2652665 | up   | -1.02265   | -0.032312393 | 1.02265   | down |
| C23 H27 Cl O8 S                                     | 0.00136037  | 0.043720596 | 8.15663    | 3.0279732   | 8.15663   | up   | -84.92112  | -6.4080515  | 84.92112  | down | -692.67017 | -9.436025    | 692.67017 | down |
| D-TAGATOSE (CAS# 87-81-0); (M+Cl)-                  | 0.003296553 | 0.043720596 | 3.2809014  | 1.7140923   | 3.2809014 | up   | -1.2900916 | -0.3674736  | 1.2900916 | down | -4.2326636 | -2.0815659   | 4.2326636 | down |
| C23 H23 Cl N4 O2                                    | 4.68E-04    | 0.043720596 | 1.3906152  | 0.47572327  | 1.3906152 | up   | 1.016041   | 0.022958755 | 1.016041  | up   | -1.3686604 | -0.4527645   | 1.3686604 | down |
| C11 H19 N3 O3                                       | 0.001523063 | 0.043720596 | 14.22387   | 3.8302422   | 14.22387  | up   | -1.0940399 | -0.12966537 | 1.0940399 | down | -15.561481 | -9.599705    | 15.561481 | down |
| C22 H32 N4 O                                        | 0.002704005 | 0.043720596 | -2.6089282 | -1.3834572  | 2.6089282 | down | -4.7787075 | -2.2566204  | 4.7787075 | down | -1.8316746 | -0.8731632   | 1.8316746 | down |
| C12 H15 N O4                                        | 0.002041055 | 0.043720596 | 11.526131  | 3.5268364   | 11.526131 | up   | -20.687637 | -4.370697   | 20.687637 | down | -238.44843 | -7.8975334   | 238.44843 | down |
| C14 H14 O22 P4                                      | 0.001952226 | 0.043720596 | 1.9399897  | 0.95604897  | 1.9399897 | up   | -1.2510067 | -0.3230896  | 1.2510067 | down | -2.4269402 | -1.2791386   | 2.4269402 | down |
| FRUCTOSE (CAS# 57-48-7); (M+Cl)-                    | 0.003296553 | 0.043720596 | 3.2809014  | 1.7140923   | 3.2809014 | up   | -1.2900916 | -0.3674736  | 1.2900916 | down | -4.2326636 | -2.0815659   | 4.2326636 | down |
| 912.2129@8.460721                                   | 0.003673614 | 0.043720596 | 1.8065094  | 0.8532047   | 1.8065094 | up   | 1.830578   | 0.8722992   | 1.830578  | up   | 1.0133233  | 0.019094467  | 1.0133233 | up   |
| 844.225@8.460042                                    | 0.00369896  | 0.043720596 | 2.0805664  | 1.0569763   | 2.0805664 | up   | 2.011349   | 1.0081635   | 2.011349  | up   | -1.0344135 | -0.048812866 | 1.0344135 | down |
| 782.2537@8.460257                                   | 0.003626898 | 0.043720596 | 1.9310604  | 0.9493933   | 1.9310604 | up   | 1.8985088  | 0.9248667   | 1.8985088 | up   | -1.0171459 | -0.024526596 | 1.0171459 | down |
| 900.4308@13.097647                                  | 0.002770544 | 0.043720596 | 2.4495888  | 1.2925396   | 2.4495888 | up   | 2.3109646  | 1.2084951   | 2.3109646 | up   | -1.0599854 | -0.08404446  | 1.0599854 | down |
| 968.4186@13.099865                                  | 0.002947956 | 0.043720596 | 2.3739204  | 1.2472715   | 2.3739204 | up   | 2.3094985  | 1.2075796   | 2.3094985 | up   | -1.0278943 | -0.039691925 | 1.0278943 | down |
| 776.1531@13.099658                                  | 0.002939009 | 0.043720596 | 1.5744107  | 0.65481186  | 1.5744107 | up   | 1.6236984  | 0.6992836   | 1.6236984 | up   | 1.0313054  | 0.04447174   | 1.0313054 | up   |
| 810.3161@13.099784                                  | 0.003070931 | 0.043720596 | 2.301461   | 1.2025499   | 2.301461  | up   | 2.2729673  | 1.184577    | 2.2729673 | up   | -1.0125358 | -0.017972946 | 1.0125358 | down |
| 827.5673@24.247963                                  | 0.002922999 | 0.043720596 | 185.63145  | 7.54E+00    | 185.63145 | up   | -2.109601  | -1.0769701  | 2.109601  | down | -391.6084  | -8.613268    | 391.6084  | down |
| 774.5898@24.286057                                  | 0.002491812 | 0.043720596 | 2.1162844  | 1.0815334   | 2.1162844 | up   | -1.6167837 | -0.6931267  | 1.6167837 | down | -3.4215739 | -1.7746601   | 3.4215739 | down |
| 967.5749@25.17143                                   | 0.001248663 | 0.043720596 | 2.1025271  | 1.0721245   | 2.1025271 | up   | -1.8875644 | -0.91652584 | 1.8875644 | down | -3.9686553 | -1.9886503   | 3.9686553 | down |
| 857.6148@25.444185                                  | 9.73E-04    | 0.043720596 | 38.497406  | 5.2666893   | 38.497406 | up   | -7.5810394 | -2.9223957  | 7.5810394 | down | -291.85034 | -8.189085    | 291.85034 | down |
| 807.2674@22.275352                                  | 6.68E-04    | 0.043720596 | -1.9080013 | -0.93206215 | 1.9080013 | down | -1.2196592 | -0.28647804 | 1.2196592 | down | 1.5643725  | 0.6455841    | 1.5643725 | up   |
| 807.2695@22.306526                                  | 0.001455615 | 0.043720596 | -1.8390754 | -0.87898064 | 1.8390754 | down | -4.783059  | -2.2579336  | 4.783059  | down | -2.6007955 | -1.378953    | 2.6007955 | down |
| 757.8295@0.5829288                                  | 5.06E-04    | 0.043720596 | -2.3773077 | -1.25E+00   | 2.3773077 | down | 1.4154041  | 0.501214    | 1.4154041 | up   | 3.364851   | 1.7505426    | 3.364851  | up   |
| 893.8083@0.5906194                                  | 0.003689032 | 0.043720596 | -8.798628  | -3.1372786  | 8.798628  | down | 1.2665803  | 0.34093857  | 1.2665803 | up   | 11.144169  | 3.4782171    | 11.144169 | up   |
| 825.8165@0.5850002                                  | 0.001390864 | 0.043720596 | -2.017585  | -1.0126295  | 2.017585  | down | 1.507056   | 0.591733    | 1.507056  | up   | 3.0406137  | 1.6043625    | 3.0406137 | up   |
| 841.7887@0.5935558                                  | 0.002608982 | 0.043720596 | -56.440163 | -5.8186502  | 56.440163 | down | 1.4118886  | 0.4976263   | 1.4118886 | up   | 79.687225  | 6.3162766    | 79.687225 | up   |
| C41 H54 O6 P2 S                                     | 0.003928671 | 0.044948332 | 2.0660033  | 1.0468426   | 2.0660033 | up   | 2.099859   | 1.0702925   | 2.099859  | up   | 1.0163871  | 0.023449898  | 1.0163871 | up   |
| C17 H24 N2 O6 P4                                    | 0.004013365 | 0.044948332 | 1.1624594  | 0.21718025  | 1.1624594 | up   | 1.2042979  | 0.2681923   | 1.2042979 | up   | 1.0359914  | 0.05101204   | 1.0359914 | up   |
| C29 H45 N5 O5                                       | 0.003976297 | 0.044948332 | 1.3081945  | 0.38757706  | 1.3081945 | up   | 1.2032483  | 0.2669344   | 1.2032483 | up   | -1.0872191 | -0.12064266  | 1.0872191 | down |
| C19 H22 N14 O3 S2                                   | 0.004063975 | 0.04        |            |             |           |      |            |             |           |      |            |              |           |      |

| <b>Sample ID</b> | <b>Name</b> | <b>GROUP</b>  | <b>FILE</b>                   |
|------------------|-------------|---------------|-------------------------------|
| S00001201        |             | POOLED PLASMA | Pos_Human Plasma Extraction_0 |
| S00001201        |             | POOLED PLASMA | Pos_Human Plasma Extraction_1 |
| S00001201        |             | POOLED PLASMA | Pos_Human Plasma Extraction_2 |
| S00001201        |             | POOLED PLASMA | Pos_Human Plasma Extraction_3 |
| S00001201        |             | POOLED PLASMA | Pos_Human Plasma Extraction_4 |
| S00001201        |             | POOLED PLASMA | Pos_Human Plasma Extraction_5 |
| S00001201        |             | POOLED PLASMA | Pos_Human Plasma Extraction_6 |
| S00016763        |             | POOLED        | Pos_Pool QC 1                 |
| S00016763        |             | POOLED        | Pos_Pool QC 2                 |
| S00016763        |             | POOLED        | Pos_Pool QC 3                 |
| S00016763        |             | POOLED        | Pos_Pool QC 4                 |
| S00015447        | 5022PP      | Lesional      | Pos_S00015447_1               |
| S00015448        | 5258PP      | Lesional      | Pos_S00015448_2               |
| S00015449        | 5311PP      | Lesional      | Pos_S00015449_3               |
| S00015450        | 5397PP      | Lesional      | Pos_S00015450_4               |
| S00015451        | TR PP       | Lesional      | Pos_S00015451_5               |
| S00015452        | KB PP       | Lesional      | Pos_S00015452_6               |
| S00015453        | 5022PN      | Nonlesional   | Pos_S00015453_7               |
| S00015454        | 5258PN      | Nonlesional   | Pos_S00015454_8               |
| S00015455        | 5311PN      | Nonlesional   | Pos_S00015455_9               |
| S00015456        | 5397PN      | Nonlesional   | Pos_S00015456_10              |
| S00015457        | TR PN       | Nonlesional   | Pos_S00015457_11              |
| S00015458        | KB PN       | Nonlesional   | Pos_S00015458_12              |
| S00015459        | 6108 C      | Healthy       | Pos_S00015459_13              |
| S00015460        | 5660 C      | Healthy       | Pos_S00015460_14              |
| S00015461        | 4480 C      | Healthy       | Pos_S00015461_15              |
| S00015462        | 6609 C      | Healthy       | Pos_S00015462_16              |
| S00015463        | 6998 C      | Healthy       | Pos_S00015463_17              |
| S00015464        | DM NN       | Healthy       | Pos_S00015464_18              |









|                                                                                |               |    |   |                    |
|--------------------------------------------------------------------------------|---------------|----|---|--------------------|
| 784.4937@22.412384                                                             |               |    |   |                    |
| 785.5006@8.232729                                                              |               |    |   |                    |
| 785.53@24.35946                                                                |               |    |   |                    |
| 785.5852@25.195345                                                             |               |    |   |                    |
| 785.5877@24.955555                                                             |               |    |   |                    |
| 785.5182@22.788332                                                             |               |    |   |                    |
| 786.5229@22.476688                                                             |               |    |   |                    |
| 787.5016@22.77321                                                              |               |    |   |                    |
| 787.5026@22.468431                                                             |               |    |   |                    |
| 788.5266@22.951626                                                             |               |    |   |                    |
| 789.2611@22.251148                                                             |               |    |   |                    |
| 789.2642@22.332657                                                             |               |    |   |                    |
| 790.996@21.349993                                                              |               |    |   |                    |
| 792.4642@22.26437                                                              |               |    |   |                    |
| 792.5548@22.774387                                                             |               |    |   |                    |
| 793.5564@23.077744                                                             |               |    |   |                    |
| 793.5193@22.47253                                                              |               |    |   |                    |
| 793.5283@22.272923                                                             |               |    |   |                    |
| 794.2594@22.54076                                                              |               |    |   |                    |
| 794.326@17.455503                                                              |               |    |   |                    |
| 794.3295@16.810375                                                             |               |    |   |                    |
| 794.3422@6.6771693                                                             |               |    |   |                    |
| 794.5737@22.256075                                                             |               |    |   |                    |
| 795.5113@24.243965                                                             |               |    |   |                    |
| 795.5152@24.516008                                                             |               |    |   |                    |
| 795.7901@25.479336                                                             |               |    |   |                    |
| 795.7949@25.335617                                                             |               |    |   |                    |
| 796.3903@21.512106                                                             |               |    |   |                    |
| 796.4836@24.792416                                                             |               |    |   |                    |
| 798.3285@15.589261                                                             |               |    |   |                    |
| 800.2489@15.174374                                                             |               |    |   |                    |
| 800.3571@6.6805854                                                             |               |    |   |                    |
| 800.4905@21.98228                                                              |               |    |   |                    |
| 801.6078@19.727795                                                             |               |    |   |                    |
| 802.5058@22.273735                                                             |               |    |   |                    |
| 803.5088@22.430168                                                             |               |    |   |                    |
| 803.4564@17.77778                                                              |               |    |   |                    |
| 803.5417@24.245163                                                             |               |    |   |                    |
| 803.5482@24.494387                                                             |               |    |   |                    |
| 805.0521@24.56559                                                              |               |    |   |                    |
| 806.3896@17.155703                                                             |               |    |   |                    |
| 806.4853@22.410055                                                             |               |    |   |                    |
| 807.2397@22.122429                                                             |               |    |   |                    |
| 807.2472@21.983837                                                             |               |    |   |                    |
| 807.8033@25.364607                                                             |               |    |   |                    |
| 807.8118@25.191593                                                             |               |    |   |                    |
| 808.4348@22.107382                                                             |               |    |   |                    |
| 808.5483@22.446434                                                             |               |    |   |                    |
| 808.5553@22.77996                                                              |               |    |   |                    |
| 808.8757@26.516602                                                             |               |    |   |                    |
| 809.2599@22.43519                                                              |               |    |   |                    |
| 809.2637@22.120275                                                             |               |    |   |                    |
| 810.295@16.42741                                                               |               |    |   |                    |
| 810.4212@22.899628                                                             |               |    |   |                    |
| 811.5453@24.918062                                                             |               |    |   |                    |
| 811.5476@24.620996                                                             |               |    |   |                    |
| 813.2642@22.13976                                                              |               |    |   |                    |
| 813.2651@22.035553                                                             |               |    |   |                    |
| 813.488@22.168575                                                              |               |    |   |                    |
| 814.5071@22.58073                                                              |               |    |   |                    |
| 815.2816@22.42304                                                              |               |    |   |                    |
| 816.3386@16.701916                                                             |               |    |   |                    |
| 818.5481@24.287775                                                             |               |    |   |                    |
| 819.3509@15.503695                                                             |               |    |   |                    |
| 819.5066@24.406973                                                             |               |    |   |                    |
| 819.5132@24.647125                                                             |               |    |   |                    |
| 820.6785@21.350441                                                             |               |    |   |                    |
| 822.3443@6.673502                                                              |               |    |   |                    |
| 823.3579@17.51095                                                              |               |    |   |                    |
| 823.4739@21.999432                                                             |               |    |   |                    |
| 823.5318@25.380026                                                             |               |    |   |                    |
| 823.5383@25.182149                                                             |               |    |   |                    |
| 824.5407@22.774292                                                             |               |    |   |                    |
| 824.546@22.43388                                                               |               |    |   |                    |
| 825.4823@22.123959                                                             |               |    |   |                    |
| 825.4897@22.337337                                                             |               |    |   |                    |
| 827.4613@5.6203575                                                             |               |    |   |                    |
| 827.4636@24.281665                                                             |               |    |   |                    |
| 827.5443@24.206425                                                             |               |    |   |                    |
| 827.5454@24.372906                                                             |               |    |   |                    |
| 828.3997@19.74982                                                              |               |    |   |                    |
| 828.5102@22.623009                                                             |               |    |   |                    |
| 828.5148@22.427803                                                             |               |    |   |                    |
| 829.569@22.580737                                                              |               |    |   |                    |
| 83.9528@3.5160841                                                              |               |    |   |                    |
| 83.9529@0.8059941                                                              |               |    |   |                    |
| 830.5392@22.788803                                                             |               |    |   |                    |
| 830.5403@22.445963                                                             |               |    |   |                    |
| 831.1864@24.859982                                                             |               |    |   |                    |
| 831.5711@22.912127                                                             |               |    |   |                    |
| 831.8173@25.115229                                                             |               |    |   |                    |
| 832.9296@26.10271                                                              |               |    |   |                    |
| 832.9368@25.862532                                                             |               |    |   |                    |
| 833.828@25.63534                                                               |               |    |   |                    |
| 833.8331@25.473904                                                             |               |    |   |                    |
| 834.4018@22.2187047                                                            |               |    |   |                    |
| 838.3228@16.71113                                                              |               |    |   |                    |
| 838.3332@5.899891                                                              |               |    |   |                    |
| 838.4701@22.265482                                                             |               |    |   |                    |
| 840.3294@22.59082                                                              |               |    |   |                    |
| 841.3327@15.513131                                                             |               |    |   |                    |
| 842.3518@16.861749                                                             |               |    |   |                    |
| 842.3581@18.739824                                                             |               |    |   |                    |
| 843.5096@24.13249                                                              |               |    |   |                    |
| 843.5149@24.358906                                                             |               |    |   |                    |
| 843.5152@24.494684                                                             |               |    |   |                    |
| 843.5377@22.50305                                                              |               |    |   |                    |
| 844.5074@5.009975                                                              |               |    |   |                    |
| 844.5132@22.242424                                                             |               |    |   |                    |
| 845.5211@24.264343                                                             |               |    |   |                    |
| 845.5264@24.562315                                                             |               |    |   |                    |
| 846.3861@18.078674                                                             |               |    |   |                    |
| 846.533@22.45591                                                               |               |    |   |                    |
| 846.5348@22.236986                                                             |               |    |   |                    |
| 847.5381@24.538563                                                             |               |    |   |                    |
| 847.5361@24.92951                                                              |               |    |   |                    |
| 847.5401@25.099321                                                             |               |    |   |                    |
| 847.5656@23.07916                                                              |               |    |   |                    |
| 847.5699@22.747322                                                             |               |    |   |                    |
| 849.6956@21.359217                                                             |               |    |   |                    |
| 849.7946@25.00409                                                              |               |    |   |                    |
| 850.4168@17.390692                                                             |               |    |   |                    |
| 850.5027@22.625221                                                             |               |    |   |                    |
| 850.5065@22.444714                                                             |               |    |   |                    |
| 851.8118@25.594587                                                             |               |    |   |                    |
| 851.8178@25.34311                                                              |               |    |   |                    |
| 852.5753@22.548275                                                             |               |    |   |                    |
| 852.5821@22.78476                                                              |               |    |   |                    |
| 853.5228@24.458563                                                             |               |    |   |                    |
| 854.4479@13.245994                                                             |               |    |   |                    |
| 854.4511@22.263014                                                             |               |    |   |                    |
| 855.2961@16.427008                                                             |               |    |   |                    |
| 855.2996@22.330704                                                             |               |    |   |                    |
| 857.3804@13.576004                                                             |               |    |   |                    |
| 857.7144@13.581676                                                             |               |    |   |                    |
| 857.8393@25.265139                                                             |               |    |   |                    |
| 857.8468@25.095256                                                             |               |    |   |                    |
| 858.5306@22.280897                                                             |               |    |   |                    |
| 860.3678@16.733767                                                             |               |    |   |                    |
| 861.5069@22.45328                                                              |               |    |   |                    |
| 861.5118@22.669655                                                             |               |    |   |                    |
| 862.2494@22.540915                                                             |               |    |   |                    |
| 863.5081@24.520555                                                             |               |    |   |                    |
| 865.358@18.392959                                                              |               |    |   |                    |
| 865.4949@22.028224                                                             |               |    |   |                    |
| 866.5028@21.646309                                                             |               |    |   |                    |
| 868.239@15.176519                                                              |               |    |   |                    |
| 868.572@22.445438                                                              |               |    |   |                    |
| 871.5331@24.454992                                                             |               |    |   |                    |
| 872.3648@17.680222                                                             |               |    |   |                    |
| 872.544@22.423755                                                              |               |    |   |                    |
| 873.5456@24.969215                                                             |               |    |   |                    |
| 873.5459@24.643751                                                             |               |    |   |                    |
| 874.5523@22.484612                                                             |               |    |   |                    |
| 874.5603@22.785263                                                             |               |    |   |                    |
| 875.5576@25.349667                                                             |               |    |   |                    |
| 875.558@25.197231                                                              |               |    |   |                    |
| 875.8166@25.536413                                                             |               |    |   |                    |
| 875.82@25.311146                                                               |               |    |   |                    |
| 875.8232@25.200348                                                             |               |    |   |                    |
| 876.3051@19.817077                                                             |               |    |   |                    |
| 879.7467@19.318176                                                             |               |    |   |                    |
| 880.5148@22.278997                                                             |               |    |   |                    |
| 882.338@16.728094                                                              |               |    |   |                    |
| 883.2687@22.436209                                                             |               |    |   |                    |
| 885.5432@24.749071                                                             |               |    |   |                    |
| 886.3777@16.156132                                                             |               |    |   |                    |
| 886.3806@16.197645                                                             |               |    |   |                    |
| 886.381@18.827066                                                              |               |    |   |                    |
| 887.515@24.447718                                                              |               |    |   |                    |
| 888.5332@22.030827                                                             |               |    |   |                    |
| 888.5448@22.161186                                                             |               |    |   |                    |
| 890.3263@6.6908507                                                             |               |    |   |                    |
| 890.4078@18.27498                                                              |               |    |   |                    |
| 890.5538@22.44111                                                              |               |    |   |                    |
| 890.9112@27.177477                                                             |               |    |   |                    |
| 890.9204@27.34777                                                              |               |    |   |                    |
| 894.3493@17.671717                                                             |               |    |   |                    |
| 894.5349@22.419611                                                             |               |    |   |                    |
| 895.4521@5.775376                                                              |               |    |   |                    |
| 895.5347@24.199373                                                             |               |    |   |                    |
| 895.5476@24.376204                                                             |               |    |   |                    |
| 897.5463@24.5801                                                               |               |    |   |                    |
| 785.5006, 3401.2224(786.5021, 1709.946)(787.4953, 643.6; 784.4937@22.412384    | FindByFormula | 28 | + | 784.4937 22.412384 |
| (393.7885, 5463.3647)(394.2588, 2543.9229)(394.76028, 675.785.5006@8.232729    | FindByFormula | 28 | + | 785.5006 8.232729  |
| (786.54156, 3232.5452)(787.5474, 1937.7084)(788.54474, 23.785.53@24.35946      | FindByFormula | 6  | + | 785.53 24.35946    |
| (786.60065, 42649.48)(787.6046, 16397.129)(788.59804, 56.785.5852@25.195345    | FindByFormula | 15 | + | 785.5852 25.195345 |
| (786.5924, 116.62)(787.554, 51.12)(8024.5548, 132.78)(8008.6785.5877@24.955555 | FindByFormula | 1  | + | 785.5877 24.955555 |
| (394.2638, 5242.5073)(394.76407, 2247.1687)(395.27478, 21.786.5182@22.788332   | FindByFormula | 16 | + | 786.5182 22.788332 |
| (394.2681, 872.528)(394.7605, 247.43001)(395.2763, 1344.3-786.5229@22.476688   | FindByFormula | 5  | + | 786.5229 22.476688 |
| (788.5157, 309.1)(789.5003, 292.92)(810.4937, 83.8) 787.5016@22.77321          | FindByFormula | 11 | + | 787.5016 22.77321  |
| (788.5059, 1551.76)(789.5101, 1092.4568)(790.50446, 503.21787.5026@22.468431   | FindByFormula | 1  | + | 787.5026 22.468431 |
| (789.5394, 25.764778)(790.5316, 13.76.0228)(791.5298, 822.788.5266@22.951626   | FindByFormula | 14 | + | 788.5266 22.951626 |
| (790.2712, 1781.453)(791.27374, 694.088)(792.2647, 209.6-789.2611@22.251148    | FindByFormula | 15 | + | 789.2611 22.251148 |
| (790.27124, 2587.855)(791.27545, 981.6931)(792.2751, 427.788.2642@22.332657    | FindByFormula | 16 | + | 789.2642 22.332657 |
| (792.0033, 1249.2)(793.01056, 782.19403)(794.01404, 438.4.790.996@21.349993    | FindByFormula | 5  | + | 790.996 21.349993  |
| (397.2397, 34658.07)(397.7404, 15127.954)(398.244, 4595.2.792.4642@22.26437    | FindByFormula | 28 | + | 792.4642 22.26437  |
| (793.5664, 2277.87)(794.5648, 984.51)(795.5425, 664.07) 792.5548@22.774387     | FindByFormula | 14 | + | 792.5548 22.774387 |
| (793.56433, 7208.9053)(794.5667, 3402.488)(795.5675, 132.792.5504@23.077744    | FindByFormula | 1  | + | 792.5564 23.077744 |
| (794.5366, 6428.08)(795.5362, 4650.43)(802.5548, 1607.6-793.5193@22.47253      | FindByFormula | 5  | + | 793.5193 22.47253  |
| (794.52783, 279.3943)(795.5259, 215.46799)(796.527, 318.6-793.5283@22.272923   | FindByFormula | 7  | + | 793.5283 22.272923 |
| (795.2646, 1742.3591)(796.2711, 780.85516) 794.2594@22.54076                   | FindByFormula | 2  | + | 794.2594 22.54076  |
| (795.33545, 95137.68)(796.33856, 45573.34)(797.3407, 1310.794.326@17.455503    | FindByFormula | 28 | + | 794.326 17.455503  |
| (795.33496, 34160.832)(796.3378, 16569.498)(797.34015, 49.794.3295@16.810375   | FindByFormula | 28 | + | 794.3295 16.810375 |
| (398.1769, 1366.5067)(398.6771, 634.7233) 794.3422@6.6771693                   | FindByFormula | 6  | + | 794.3422 6.6771693 |
| (795.45056, 1668.787)(796.4946, 828.3176)(797.444, 422.39-794.457@22.256075    | FindByFormula | 25 | + | 794.457 22.256075  |
| (398.7615, 57.94)(399.2763, 45.93)(796.52686, 9927.225)(797.795.5113@24.243965 | FindByFormula | 2  | + | 795.5113 24.243965 |
| (398.76248, 8418.239)(399.2623, 4077.2097)(399.76578, 120.795.5152@24.516008   | FindByFormula | 12 | + | 795.5152 24.516008 |
| (796.7996, 4385.94)(797.8053, 2683.93)(798.8053, 1324.43) 795.7901@25.479336   | FindByFormula | 1  | + | 795.7901 25.479336 |
| (796.80963, 6385.6465)(797.811, 3366.6934)(798.811, 1266.795.7949@25.335617    | FindByFormula | 12 | + | 795.7949 25.335617 |
| (797.3932, 1500.3534)(798.3943, 734.0576)(799.3939, 389.7196.3903@21.512106    | FindByFormula | 26 | + | 796.3903 21.512106 |
| (797.48816, 1115.8356)(798.491, 632.9324)(799.4878, 329.795.4837@24.792416     | FindByFormula | 12 | + | 796.4837 24.792416 |
| (400.1719, 13145.6045)(400.6726, 5238.053)(401.1812, 2285.798.3285@15.589261   | FindByFormula | 6  | + | 798.3285 15.589261 |
| (401.1326, 2864.485)(401.63217, 1053.8817) 800.2489@15.174374                  | FindByFormula | 6  | + | 800.2489 15.174374 |
| (801.3602, 4562.161)(802.3642, 2063.056)(803.3694, 714.331.800.3571@6.6805854  | FindByFormula | 10 | + | 800.3571 6.6805854 |
| (801.4961, 10543.395)(802.49774, 4744.088)(803.49457, 151.800.4905@21.98228    | FindByFormula | 15 | + | 800.4905 21.98228  |
| (802.6141, 1375.0049)(803.6123, 851.07) 801.6078@19.727795                     | FindByFormula | 6  | + | 801.6078 19.727795 |
| (402.2656, 617.79)(402.7657, 81.83)(403.2589, 218.73) 802.5058@22.273735       | FindByFormula | 21 | + | 802.5058 22.273735 |
| (402.26428, 9072.524)(402.76117, 2723.828)(403.26736, 14.802.                  |               |    |   |                    |

|                                                               |                                                               |                                                               |                                                               |                                     |               |    |          |             |
|---------------------------------------------------------------|---------------------------------------------------------------|---------------------------------------------------------------|---------------------------------------------------------------|-------------------------------------|---------------|----|----------|-------------|
| 896.4602@22.272749                                            |                                                               |                                                               |                                                               |                                     | FindByFormula | 26 | 898.4602 | 22.272749   |
| 898.4725@13.568503                                            |                                                               |                                                               |                                                               |                                     | FindByFormula | 28 | 898.4725 | 13.568503   |
| 899.5587@24.851969                                            |                                                               |                                                               |                                                               |                                     | FindByFormula | 1  | 899.5587 | 24.851969   |
| 899.5588@25.093525                                            |                                                               |                                                               |                                                               |                                     | FindByFormula | 15 | 899.5588 | 25.093525   |
| 899.8317@25.106229                                            |                                                               |                                                               |                                                               |                                     | FindByFormula | 1  | 899.8317 | 25.106229   |
| 902.5615@22.287943                                            |                                                               |                                                               |                                                               |                                     | FindByFormula | 18 | 902.5615 | 22.287943   |
| 902.5975@23.068104                                            |                                                               |                                                               |                                                               |                                     | FindByFormula | 17 | 902.5975 | 23.068104   |
| 903.4606@10.295564                                            |                                                               |                                                               |                                                               |                                     | FindByFormula | 8  | 903.4606 | 10.295564   |
| 904.3297@16.73777                                             |                                                               |                                                               |                                                               |                                     | FindByFormula | 6  | 904.3297 | 16.73777    |
| 904.3876@16.983585                                            |                                                               |                                                               |                                                               |                                     | FindByFormula | 1  | 904.3876 | 16.983585   |
| 904.3903@16.992311                                            |                                                               |                                                               |                                                               |                                     | FindByFormula | 7  | 904.3903 | 16.992311   |
| 904.3945@16.754278                                            |                                                               |                                                               |                                                               |                                     | FindByFormula | 6  | 904.3945 | 16.754278   |
| 904.5756@22.50441                                             |                                                               |                                                               |                                                               |                                     | FindByFormula | 24 | 904.5756 | 22.50441    |
| 904.5778@22.660416                                            |                                                               |                                                               |                                                               |                                     | FindByFormula | 6  | 904.5778 | 22.660416   |
| 906.2928@16.095007                                            |                                                               |                                                               |                                                               |                                     | FindByFormula | 3  | 906.2928 | 16.095007   |
| 906.3217@25.000583                                            |                                                               |                                                               |                                                               |                                     | FindByFormula | 3  | 906.3217 | 25.000583   |
| 907.4604@24.366047                                            |                                                               |                                                               |                                                               |                                     | FindByFormula | 11 | 907.4604 | 24.366047   |
| 908.3653@18.828564                                            |                                                               |                                                               |                                                               |                                     | FindByFormula | 6  | 908.3653 | 18.828564   |
| 912.5968@22.448559                                            |                                                               |                                                               |                                                               |                                     | FindByFormula | 20 | 912.5968 | 22.448559   |
| 913.233@3.608588                                              |                                                               |                                                               |                                                               |                                     | FindByFormula | 20 | 913.233  | 3.608588    |
| 915.5211@24.535116                                            |                                                               |                                                               |                                                               |                                     | FindByFormula | 12 | 915.5211 | 24.535116   |
| 916.4032@18.132708                                            |                                                               |                                                               |                                                               |                                     | FindByFormula | 12 | 916.4032 | 18.132708   |
| 918.5902@22.784018                                            |                                                               |                                                               |                                                               |                                     | FindByFormula | 18 | 918.5902 | 22.784018   |
| 919.4562@16.677266                                            |                                                               |                                                               |                                                               |                                     | FindByFormula | 6  | 919.4562 | 16.677266   |
| 923.4806@22.453142                                            |                                                               |                                                               |                                                               |                                     | FindByFormula | 15 | 923.4806 | 22.453142   |
| 924.5438@22.285477                                            |                                                               |                                                               |                                                               |                                     | FindByFormula | 27 | 924.5438 | 22.285477   |
| 924.6388@22.793396                                            |                                                               |                                                               |                                                               |                                     | FindByFormula | 1  | 924.6388 | 22.793396   |
| 924.6419@23.040983                                            |                                                               |                                                               |                                                               |                                     | FindByFormula | 1  | 924.6419 | 23.040983   |
| 925.4703@24.515404                                            |                                                               |                                                               |                                                               |                                     | FindByFormula | 17 | 925.4703 | 24.515404   |
| 925.5725@25.451336                                            |                                                               |                                                               |                                                               |                                     | FindByFormula | 1  | 925.5725 | 25.451336   |
| 925.573@25.266247                                             |                                                               |                                                               |                                                               |                                     | FindByFormula | 13 | 925.573  | 25.266247   |
| 925.8507@25.536413                                            |                                                               |                                                               |                                                               |                                     | FindByFormula | 1  | 925.8507 | 25.536413   |
| 925.8544@25.280811                                            |                                                               |                                                               |                                                               |                                     | FindByFormula | 18 | 925.8544 | 25.280811   |
| 926.3747@16.754114                                            |                                                               |                                                               |                                                               |                                     | FindByFormula | 8  | 926.3747 | 16.754114   |
| 926.3777@16.987132                                            |                                                               |                                                               |                                                               |                                     | FindByFormula | 8  | 926.3777 | 16.987132   |
| 926.3777@16.987142                                            |                                                               |                                                               |                                                               |                                     | FindByFormula | 2  | 926.3777 | 16.987142   |
| 929.1763@10.6045015                                           |                                                               |                                                               |                                                               |                                     | FindByFormula | 2  | 929.1763 | 10.6045015  |
| 929.1824@10.6389937                                           |                                                               |                                                               |                                                               |                                     | FindByFormula | 6  | 929.1824 | 10.6389937  |
| 929.4978@22.457798                                            |                                                               |                                                               |                                                               |                                     | FindByFormula | 11 | 929.4978 | 22.457798   |
| 930.2113@19.410568                                            |                                                               |                                                               |                                                               |                                     | FindByFormula | 7  | 930.2113 | 19.410568   |
| 934.4355@18.447943                                            |                                                               |                                                               |                                                               |                                     | FindByFormula | 6  | 934.4355 | 18.447943   |
| 934.5858@22.438871                                            |                                                               |                                                               |                                                               |                                     | FindByFormula | 25 | 934.5858 | 22.438871   |
| 937.2088@19.411821                                            |                                                               |                                                               |                                                               |                                     | FindByFormula | 7  | 937.2088 | 19.411821   |
| 938.564@22.436773                                             |                                                               |                                                               |                                                               |                                     | FindByFormula | 25 | 938.564  | 22.436773   |
| 939.5053@10.673127                                            |                                                               |                                                               |                                                               |                                     | FindByFormula | 19 | 939.5053 | 10.673127   |
| 939.5101@24.245163                                            |                                                               |                                                               |                                                               |                                     | FindByFormula | 2  | 939.5101 | 24.245163   |
| 939.5172@24.440104                                            |                                                               |                                                               |                                                               |                                     | FindByFormula | 3  | 939.5172 | 24.440104   |
| 940.3933@18.134588                                            |                                                               |                                                               |                                                               |                                     | FindByFormula | 13 | 940.3933 | 18.134588   |
| 941.4594@10.395044                                            |                                                               |                                                               |                                                               |                                     | FindByFormula | 6  | 941.4594 | 10.395044   |
| 941.5282@24.661093                                            |                                                               |                                                               |                                                               |                                     | FindByFormula | 12 | 941.5282 | 24.661093   |
| 942.2077@10.67785704                                          |                                                               |                                                               |                                                               |                                     | FindByFormula | 7  | 942.2077 | 10.67785704 |
| 942.218@10.000090                                             |                                                               |                                                               |                                                               |                                     | FindByFormula | 9  | 942.218  | 10.000090   |
| 942.4885@22.279886                                            |                                                               |                                                               |                                                               |                                     | FindByFormula | 24 | 942.4885 | 22.279886   |
| 942.495@13.866499                                             |                                                               |                                                               |                                                               |                                     | FindByFormula | 27 | 942.495  | 13.866499   |
| 943.5407@25.210548                                            |                                                               |                                                               |                                                               |                                     | FindByFormula | 12 | 943.5407 | 25.210548   |
| 946.2066@18.899412                                            |                                                               |                                                               |                                                               |                                     | FindByFormula | 7  | 946.2066 | 18.899412   |
| 946.5839@22.293484                                            |                                                               |                                                               |                                                               |                                     | FindByFormula | 27 | 946.5839 | 22.293484   |
| 946.6215@23.066227                                            |                                                               |                                                               |                                                               |                                     | FindByFormula | 14 | 946.6215 | 23.066227   |
| 946.4163@23.004777                                            |                                                               |                                                               |                                                               |                                     | FindByFormula | 1  | 946.4163 | 23.004777   |
| 948.5966@22.215168                                            |                                                               |                                                               |                                                               |                                     | FindByFormula | 1  | 948.5966 | 22.215168   |
| 948.6022@22.490602                                            |                                                               |                                                               |                                                               |                                     | FindByFormula | 24 | 948.6022 | 22.490602   |
| 949.4684@24.438002                                            |                                                               |                                                               |                                                               |                                     | FindByFormula | 14 | 949.4684 | 24.438002   |
| 950.3874@18.494951                                            |                                                               |                                                               |                                                               |                                     | FindByFormula | 7  | 950.3874 | 18.494951   |
| 951.1641@10.7833265                                           |                                                               |                                                               |                                                               |                                     | FindByFormula | 6  | 951.1641 | 10.7833265  |
| 951.167@23.043814                                             |                                                               |                                                               |                                                               |                                     | FindByFormula | 1  | 951.167  | 23.043814   |
| 953.4982@25.183556                                            |                                                               |                                                               |                                                               |                                     | FindByFormula | 11 | 953.4982 | 25.183556   |
| 954.5524@22.05358                                             |                                                               |                                                               |                                                               |                                     | FindByFormula | 15 | 954.5524 | 22.05358    |
| 956.4175@18.450941                                            |                                                               |                                                               |                                                               |                                     | FindByFormula | 6  | 956.4175 | 18.450941   |
| 958.3127@16.69148                                             |                                                               |                                                               |                                                               |                                     | FindByFormula | 2  | 958.3127 | 16.69148    |
| 959.4948@24.635881                                            |                                                               |                                                               |                                                               |                                     | FindByFormula | 18 | 959.4948 | 24.635881   |
| 961.3857@19.292669                                            |                                                               |                                                               |                                                               |                                     | FindByFormula | 10 | 961.3857 | 19.292669   |
| 961.3955@5.785254                                             |                                                               |                                                               |                                                               |                                     | FindByFormula | 6  | 961.3955 | 5.785254    |
| 961.5032@24.43698                                             |                                                               |                                                               |                                                               |                                     | FindByFormula | 7  | 961.5032 | 24.43698    |
| 962.1421@10.6129925                                           |                                                               |                                                               |                                                               |                                     | FindByFormula | 5  | 962.1421 | 10.6129925  |
| 962.1435@10.61450136                                          |                                                               |                                                               |                                                               |                                     | FindByFormula | 8  | 962.1435 | 10.61450136 |
| 962.6126@22.455866                                            |                                                               |                                                               |                                                               |                                     | FindByFormula | 2  | 962.6126 | 22.455866   |
| 962.621@23.0119042                                            |                                                               |                                                               |                                                               |                                     | FindByFormula | 5  | 962.621  | 23.0119042  |
| 963.5163@24.194642                                            |                                                               |                                                               |                                                               |                                     | FindByFormula | 24 | 963.5163 | 24.194642   |
| 963.5231@24.37688                                             |                                                               |                                                               |                                                               |                                     | FindByFormula | 10 | 963.5231 | 24.37688    |
| 965.9105@27.363674                                            |                                                               |                                                               |                                                               |                                     | FindByFormula | 1  | 965.9105 | 27.363674   |
| 967.5352@24.838104                                            |                                                               |                                                               |                                                               |                                     | FindByFormula | 2  | 967.5352 | 24.838104   |
| 967.546@25.10503                                              |                                                               |                                                               |                                                               |                                     | FindByFormula | 8  | 967.546  | 25.10503    |
| 968.5615@24.031195                                            |                                                               |                                                               |                                                               |                                     | FindByFormula | 2  | 968.5615 | 24.031195   |
| 968.5665@22.293741                                            |                                                               |                                                               |                                                               |                                     | FindByFormula | 8  | 968.5665 | 22.293741   |
| 968.5668@22.29198                                             |                                                               |                                                               |                                                               |                                     | FindByFormula | 8  | 968.5668 | 22.29198    |
| 968.6634@23.068396                                            |                                                               |                                                               |                                                               |                                     | FindByFormula | 6  | 968.6634 | 23.068396   |
| 969.383@16.880194                                             |                                                               |                                                               |                                                               |                                     | FindByFormula | 16 | 969.383  | 16.880194   |
| 970.4065@10.295565                                            |                                                               |                                                               |                                                               |                                     | FindByFormula | 8  | 970.4065 | 10.295565   |
| 970.3987@19.991172                                            |                                                               |                                                               |                                                               |                                     | FindByFormula | 6  | 970.3987 | 19.991172   |
| 970.4013@17.192896                                            |                                                               |                                                               |                                                               |                                     | FindByFormula | 6  | 970.4013 | 17.192896   |
| 970.4048@16.995958                                            |                                                               |                                                               |                                                               |                                     | FindByFormula | 1  | 970.4048 | 16.995958   |
| 972.3756@18.495142                                            |                                                               |                                                               |                                                               |                                     | FindByFormula | 6  | 972.3756 | 18.495142   |
| 976.3546@18.827229                                            |                                                               |                                                               |                                                               |                                     | FindByFormula | 6  | 976.3546 | 18.827229   |
| 980.6528@19.790384                                            |                                                               |                                                               |                                                               |                                     | FindByFormula | 28 | 980.6528 | 19.790384   |
| 982.6736@25.455652                                            |                                                               |                                                               |                                                               |                                     | FindByFormula | 22 | 982.6736 | 25.455652   |
| 983.5043@24.547352                                            |                                                               |                                                               |                                                               |                                     | FindByFormula | 6  | 983.5043 | 24.547352   |
| 984.1201@10.9613991                                           |                                                               |                                                               |                                                               |                                     | FindByFormula | 5  | 984.1201 | 10.9613991  |
| 984.1208@10.71400017                                          |                                                               |                                                               |                                                               |                                     | FindByFormula | 1  | 984.1208 | 10.71400017 |
| 985.4018@19.678767                                            |                                                               |                                                               |                                                               |                                     | FindByFormula | 6  | 985.4018 | 19.678767   |
| 986.5193@22.290657                                            |                                                               |                                                               |                                                               |                                     | FindByFormula | 4  | 986.5193 | 22.290657   |
| 987.456@23.066223                                             |                                                               |                                                               |                                                               |                                     | FindByFormula | 6  | 987.456  | 23.066223   |
| 988.3911@21.798827                                            |                                                               |                                                               |                                                               |                                     | FindByFormula | 2  | 988.3911 | 21.798827   |
| 990.6147@22.29418                                             |                                                               |                                                               |                                                               |                                     | FindByFormula | 24 | 990.6147 | 22.29418    |
| 990.6425@23.054432                                            |                                                               |                                                               |                                                               |                                     | FindByFormula | 16 | 990.6425 | 23.054432   |
| 990.647@22.736769                                             |                                                               |                                                               |                                                               |                                     | FindByFormula | 2  | 990.647  | 22.736769   |
| 992.4453@17.242594                                            |                                                               |                                                               |                                                               |                                     | FindByFormula | 6  | 992.4453 | 17.242594   |
| 992.6131@16.66562                                             |                                                               |                                                               |                                                               |                                     | FindByFormula | 22 | 992.6131 | 16.66562    |
| 992.6256@22.509481                                            |                                                               |                                                               |                                                               |                                     | FindByFormula | 12 | 992.6256 | 22.509481   |
| 992.6305@22.746069                                            |                                                               |                                                               |                                                               |                                     | FindByFormula | 3  | 992.6305 | 22.746069   |
| ABRINE (CAS 526-31-8); (M+H) <sup>+</sup>                     | [tgt=41.502, overall=41.526-31-8    | FindByFormula | 2  | 218.1035 | 3.0661632   |
| ACETAMINOPHEN (TN TYLENO) (CAS 103-90-2)                      | [tgt=103.90-2, overall=103.90-2     | FindByFormula | 24 | 151.0634 | 3.7413893   |
| ACETAMINOPHEN (TN TYLENO) (CAS 103-90-2)                      | [tgt=103.90-2, overall=103.90-2     | FindByFormula | 10 | 151.0635 | 3.0741389   |
| ACETYLCHOLINE (CAS 51-84-3); M+                               | [tgt=51.84-3, overall=51.84-3       | FindByFormula | 24 | 135.0548 | 9.9186375   |
| ADENINE (CAS 73-24-5); (M+H) <sup>+</sup>                     | [tgt=73.24-5, overall=73.24-5       | FindByFormula | 2  | 142.0413 | 17.102896   |
| ADENOSINE 3',5'-BISPHOSPHATE (CAS 1053-1)                     | [tgt=1053.1, overall=1053.1         | FindByFormula | 5  | 427.0323 | 1.1954027   |
| ADENOSINE 5'-DIPHOSPHATE (CAS 58-64-0)                        | [tgt=58.64-0, overall=58.64-0       | FindByFormula | 5  | 427.0323 | 1.1954027   |
| ADENOSINE 5'-MONOPHOSPHATE (CAS 61-19-8)                      | [tgt=61.19-8, overall=61.19-8       | FindByFormula | 11 | 347.0064 | 1.232916    |
| ADIPIC ACID (CAS 124-04-9); (M+Na) <sup>+</sup>               | [tgt=124.04-9, overall=124.04-9     | FindByFormula | 2  | 169.0782 | 1.7273679   |
| ADIP-IBOSSE (CAS 1); (M+H) <sup>+</sup> ±H2O]                 | [tgt=27.99, overall=27.99]          | FindByFormula | 1  | 559.0682 | 1.0160055   |
| AHBA (CAS 76045-71-1); (M+H) <sup>+</sup>                     | [tgt=76.045, overall=76.045-71-1    | FindByFormula | 5  | 551.0413 | 1.4403882   |
| ALANINE (CAS 56-41-7); (M+H) <sup>+</sup>                     | [tgt=56.41-7, overall=56.41-7       | FindByFormula | 1  | 158.0225 | 3.0899895   |
| ALLANTOIN (CAS 97-59-6); (M+H) <sup>+</sup>                   | [tgt=97.59-6, overall=97.59-6       | FindByFormula | 7  | 180.0622 | 1.947869    |
| ALLOSE (CAS 2595-97-3); (M+H) <sup>+</sup> ±H2O]              | [tgt=93.90, overall=93.90-2595-97-3 | FindByFormula | 4  | 260.0273 | 0.8999933   |
| ALPHA-D-GALACTOSE 1-PHOSPHATE (CAS 22-14-3)                   | [tgt=225.14-3, overall=225.14-3     | FindByFormula | 26 | 270.7223 | 22.700765   |
| ALPHA-LINOLENIC ACID (CAS 463-40-1); (M+H) <sup>+</sup> ±H2O] | [tgt=463.40-1, overall=463.40-1     | FindByFormula | 2  | 240.4800 | 1.5682582   |
| ALPHA-TOCOPHEROL (CAS 59-02-9); (M+H) <sup>+</sup>            | [tgt=70.85, overall=70.85-02-9      | FindByFormula |    |          |             |











|                     |                     |                                                 |                        |                        |                                    |               |      |           |           |
|---------------------|---------------------|-------------------------------------------------|------------------------|------------------------|------------------------------------|---------------|------|-----------|-----------|
| C25 H18 O2          | C25 H18 O2          | [C25 H18 O2, lgt=91.68, overall=91.68]          | (351.13834, 2782.8916) | (352.1418, 786.635)    | (353.14328, 126.125 H18 O2         | FindByFormula | 6 +  | 350.1311  | 19.878769 |
| C25 H20 O           | C25 H20 O           | [C25 H20 O, lgt=98.28, overall=98.28]           | (337.15796, 29038.354) | (338.16052, 7503.703)  | (339.16733, 14 C25 H20 O           | FindByFormula | 7 +  | 336.1509  | 12.707867 |
| C25 H24 N8 P2       | C25 H24 N8 P2       | [C25 H24 N8 P2, lgt=61.83, overall=61.83]       | (499.16635, 2240.2866) | (500.16827, 733.73615) | (501.16757, 1 C25 H24 N8 P2        | FindByFormula | 23 + | 498.1599  | 19.252739 |
| C25 H26 N12         | C25 H26 N12         | [C25 H26 N12, lgt=79.70, overall=79.70]         | (495.24847, 2051.503)  | (496.2513, 769.0404)   | (497.24802, 384.1 C25 H26 N12      | FindByFormula | 28 + | 494.24223 | 16.442123 |
| C25 H26 N4 O2       | C25 H26 N4 O2       | [C25 H26 N4 O2, lgt=99.73, overall=99.73]       | (415.21236, 4766.614)  | (416.21589, 957.9177)  | (417.21515, 868 C25 H26 N4 O2      | FindByFormula | 24 + | 414.2051  | 18.717322 |
| C25 H28 N6 O        | C25 H28 N6 O        | [C25 H28 N6 O, lgt=51.99, overall=51.99]        | (429.23627, 868.705)   | (430.24112, 871.3725)  | (431.2243, 790 C25 H28 N6 O        | FindByFormula | 14 + | 428.2291  | 16.427258 |
| C25 H29 N3          | C25 H29 N3          | [C25 H29 N3, lgt=42.75, overall=42.75]          | (372.2434, 16182.577)  | (373.24225, 4659.038)  | (374.2443, 878. C25 H29 N3         | FindByFormula | 22 + | 373.2337  | 17.436047 |
| C25 H29 N5 O2       | C25 H29 N5 O2       | [C25 H29 N5 O2, lgt=83.59, overall=83.59]       | (432.23846, 5184.434)  | (433.24103, 1959.6527) | (434.23987, 13 C25 H29 N5 O2       | FindByFormula | 12 + | 431.2312  | 18.397682 |
| C25 H30 N10         | C25 H30 N10         | [C25 H30 N10, lgt=73.97, overall=73.97]         | (471.27197, 1666.1139) | (472.27643, 628.614)   | (473.2688, 264 C25 H30 N10         | FindByFormula | 5 +  | 470.2617  | 21.500217 |
| C25 H32 O3          | C25 H32 O3          | [C25 H32 O3, lgt=60.52, overall=60.52]          | (381.2443, 7508.383)   | (382.2465, 2072.5918)  | (383.25552, 1836 C25 H32 O3        | FindByFormula | 16 + | 380.2366  | 22.26347  |
| C25 H33 N11         | C25 H33 N11         | [C25 H33 N11, lgt=64.59, overall=64.59]         | (488.2988, 2237.0386)  | (489.29498, 825.7699)  | (490.29355, 21 C25 H33 N11         | FindByFormula | 16 + | 487.2893  | 18.333035 |
| C25 H33 N25 O       | C25 H33 N25 O       | [C25 H33 N25 O, lgt=96.68, overall=96.68]       | (700.3385, 2911.2527)  | (701.34064, 1042.5886) | (702.3487, 35 C25 H33 N25 O        | FindByFormula | 7 +  | 699.3303  | 2.5423071 |
| C25 H34 N19 P3      | C25 H34 N19 P3      | [C25 H34 N19 P3, lgt=79.32, overall=79.32]      | (694.2545, 2046.8937)  | (695.2593, 870.41003)  | (696.26666, 389 C25 H34 N19 P3     | FindByFormula | 8 +  | 693.25    | 21.593277 |
| C25 H34 N4          | C25 H34 N4          | [C25 H34 N4, lgt=97.06, overall=97.06]          | (391.28745, 4612.9785) | (392.29236, 1311.4452) | (393.2899, 21 C25 H34 N4           | FindByFormula | 23 + | 390.2794  | 23.135899 |
| C25 H34 O3 P2       | C25 H34 O3 P2       | [C25 H34 O3 P2, lgt=86.85, overall=86.85]       | (445.2066, 3682.3784)  | (446.20535, 752.3587)  | (447.21582, 21 C25 H34 O3 P2       | FindByFormula | 28 + | 444.1964  | 22.412455 |
| C25 H35 N10 O6      | C25 H35 N10 O6      | [C25 H35 N10 O6, lgt=97.72, overall=97.72]      | (446.25412, 6563.2144) | (447.257, 18098.486)   | (448.25977, 3336. C25 H35 N10 O6   | FindByFormula | 28 + | 445.2467  | 18.397379 |
| C25 H35 N16 O2 P3   | C25 H35 N16 O2 P3   | [C25 H35 N16 O2 P3, lgt=42.47, overall=42.47]   | (687.2646, 1009.876)   | (688.2655, 96.276)     | (689.2769, 14 C25 H35 N16 O2 P3    | FindByFormula | 1 +  | 686.255   | 19.81048  |
| C25 H38 S           | C25 H38 S           | [C25 H38 S, lgt=37.58, overall=37.58]           | (371.27524, 9599.475)  | (372.28012, 2380.7144) | (373.27335, 26 C25 H38 S           | FindByFormula | 26 + | 373.2769  | 21.974281 |
| C25 H39 N10 O6 S2   | C25 H39 N10 O6 S2   | [C25 H39 N10 O6 S2, lgt=29.00, overall=29.00]   | (514.2279, 3473.4785)  | (515.2322, 1198.4904)  | (516.2349, 300. C25 H39 N10 O6 S2  | FindByFormula | 24 + | 513.2208  | 7.766027  |
| C25 H39 O7 P        | C25 H39 O7 P        | [C25 H39 O7 P, lgt=86.77, overall=86.77]        | (483.25208, 3637.611)  | (484.25467, 973.44086) | (485.25787, 16 C25 H39 O7 P        | FindByFormula | 12 + | 482.2434  | 22.059784 |
| C25 H40 N10         | C25 H40 N10         | [C25 H40 N10, lgt=96.73, overall=96.73]         | (481.352, 56073.438)   | (482.35516, 17220.504) | (483.3567, 3478 C25 H40 N10        | FindByFormula | 28 + | 480.3449  | 19.788606 |
| C25 H41 N7 O2 S     | C25 H41 N7 O2 S     | [C25 H41 N7 O2 S, lgt=76.78, overall=76.78]     | (504.31186, 19523.553) | (505.314, 5801.045)    | (506.31302, 135 C25 H41 N7 O2 S    | FindByFormula | 25 + | 503.3059  | 22.021889 |
| C25 H41 N9 O4 S     | C25 H41 N9 O4 S     | [C25 H41 N9 O4 S, lgt=96.03, overall=96.03]     | (554.30505, 1995.2814) | (555.3065, 978.132)    | (556.3043, 1908 C25 H41 N9 O4 S    | FindByFormula | 10 + | 553.2998  | 21.78545  |
| C25 H42 N6 O5       | C25 H42 N6 O5       | [C25 H42 N6 O5, lgt=98.18, overall=98.18]       | (507.3289, 109296.1)   | (508.33234, 31409.65)  | (509.33456, 6547 C25 H42 N6 O5     | FindByFormula | 28 + | 505.3211  | 22.186571 |
| C25 H44 N4 O3       | C25 H44 N4 O3       | [C25 H44 N4 O3, lgt=31.31, overall=31.31]       | (449.34842, 5004.39)   | (450.3512, 1548.15)    | (451.3502, 337 C25 H44 N4 O3       | FindByFormula | 23 + | 448.3407  | 17.285015 |
| C25 H45 N4 O        | C25 H45 N4 O        | [C25 H45 N4 O, lgt=98.98, overall=98.98]        | (424.342, 17825.191)   | (425.34412, 5130.193)  | (426.34634, 940 C25 H45 N4 O       | FindByFormula | 23 + | 424.335   | 21.08845  |
| C25 H45 N8 O        | C25 H45 N8 O        | [C25 H45 N8 O, lgt=82.04, overall=82.04]        | (488.3197, 1036.383)   | (489.32098, 742.9513)  | (490.31894, 12 C25 H45 N8 O        | FindByFormula | 28 + | 487.309   | 5.32748   |
| C25 H45 N14 P3      | C25 H45 N14 P3      | [C25 H45 N14 P3, lgt=89.41, overall=89.41]      | (635.32056, 2017.5798) | (636.3257, 1030.1917)  | (637.3229, 501 C25 H45 N14 P3      | FindByFormula | 9 +  | 634.313   | 14.880903 |
| C25 H46 N7 O2 P S2  | C25 H46 N7 O2 P S2  | [C25 H46 N7 O2 P S2, lgt=82.20, overall=82.20]  | (572.3296, 13286.486)  | (573.33457, 4280.053)  | (574.3325, 12 C25 H46 N7 O2 P S2   | FindByFormula | 25 + | 571.3205  | 21.365922 |
| C25 H47 N4 O        | C25 H47 N4 O        | [C25 H47 N4 O, lgt=97.75, overall=97.75]        | (426.32578, 12169.553) | (427.329, 3696.0928)   | (428.32644, 1362. C25 H47 N4 O     | FindByFormula | 27 + | 425.3499  | 21.559666 |
| C25 H47 N3 O S3     | C25 H47 N3 O S3     | [C25 H47 N3 O S3, lgt=64.64, overall=64.64]     | (502.32903, 1711.8961) | (503.29904, 86.9125)   | (504.2469, 1597 C25 H47 N3 O S3    | FindByFormula | 27 + | 501.2899  | 22.004158 |
| C25 H47 N3 O S5     | C25 H47 N3 O S5     | [C25 H47 N3 O S5, lgt=65.59, overall=65.59]     | (502.329, 20521.48)    | (503.33157, 6785.014)  | (504.34012, 20868 C25 H47 N3 O S5  | FindByFormula | 17 + | 501.327   | 22.494976 |
| C25 H48 N2 O3 S     | C25 H48 N2 O3 S     | [C25 H48 N2 O3 S, lgt=51.83, overall=51.83]     | (457.34604, 25331.607) | (458.3492, 7250.97)    | (459.34558, 248 C25 H48 N2 O3 S    | FindByFormula | 22 + | 456.3404  | 22.75945  |
| C25 H49 N4 O        | C25 H49 N4 O        | [C25 H49 N4 O, lgt=94.96, overall=94.96]        | (428.37195, 1702.7853) | (429.37344, 665.62695) | (430.38144, 8 C25 H49 N4 O         | FindByFormula | 23 + | 427.3633  | 21.881723 |
| C25 H51 N4 O        | C25 H51 N4 O        | [C25 H51 N4 O, lgt=99.89, overall=99.89]        | (430.3888, 4073.2844)  | (431.38999, 1337.4008) | (432.38979, 30 C25 H51 N4 O        | FindByFormula | 8 +  | 430.39    | 19.99119  |
| C25 H51 N2 O P S    | C25 H51 N2 O P S    | [C25 H51 N2 O P S, lgt=72.69, overall=72.69]    | (459.35443, 22832.83)  | (460.35745, 8700.9727) | (461.35394, 12 C25 H51 N2 O P S    | FindByFormula | 28 + | 458.3483  | 21.705878 |
| C25 H51 N5 O10 S    | C25 H51 N5 O10 S    | [C25 H51 N5 O10 S, lgt=87.87, overall=87.87]    | (614.3422, 32051.613)  | (615.34503, 9975.589)  | (616.3477, 2599 C25 H51 N5 O10 S   | FindByFormula | 26 + | 613.3889  | 22.64319  |
| C25 H51 O2 P3       | C25 H51 O2 P3       | [C25 H51 O2 P3, lgt=1.84, overall=1.84]         | (477.31552, 816.6625)  | (478.31665, 337.666)   | (479.31796, 394. C25 H51 O2 P3     | FindByFormula | 14 + | 476.313   | 21.872295 |
| C25 H52 N6 O7 S2    | C25 H52 N6 O7 S2    | [C25 H52 N6 O7 S2, lgt=92.15, overall=92.15]    | (613.33997, 8245.895)  | (614.34283, 2535.0396) | (615.34094, 71 C25 H52 N6 O7 S2    | FindByFormula | 28 + | 612.3333  | 11.198398 |
| C25 H52 O3 P2       | C25 H52 O3 P2       | [C25 H52 O3 P2, lgt=92.38, overall=92.38]       | (463.3437, 2351.142)   | (464.34317, 935.5086)  | (465.33996, 933 C25 H52 O3 P2      | FindByFormula | 11 + | 462.3346  | 22.779625 |
| C25 H53 N10 O2      | C25 H53 N10 O2      | [C25 H53 N10 O2, lgt=95.21, overall=95.21]      | (600.41312, 17088.608) | (601.41556, 4209.0288) | (602.4186, 13 C25 H53 N10 O2       | FindByFormula | 27 + | 599.4067  | 22.195105 |
| C25 H54 N4 O2 S2    | C25 H54 N4 O2 S2    | [C25 H54 N4 O2 S2, lgt=12.07, overall=12.07]    | (607.37564, 3019.7498) | (608.3784, 1013.4087)  | (609.37462, 261 C25 H54 N4 O2 S2   | FindByFormula | 24 + | 506.3681  | 21.028948 |
| C25 H55 N5 O3 P2 S2 | C25 H55 N5 O3 P2 S2 | [C25 H55 N5 O3 P2 S2, lgt=81.42, overall=81.42] | (600.32935, 9816.214)  | (601.3335, 3090.9702)  | (602.336, 1598 C25 H55 N5 O3 P2 S2 | FindByFormula | 23 + | 599.326   | 22.550123 |
| C25 H56 N12 P2 S    | C25 H56 N12 P2 S    | [C25 H56 N12 P2 S, lgt=44.07, overall=44.07]    | (619.4029, 10644.549)  | (620.4041, 4376.837)   | (621.39813, 1467 C25 H56 N12 P2 S  | FindByFormula | 22 + | 618.3911  | 22.09414  |
| C26 H20 N2 O4       | C26 H20 N2 O4       | [C26 H20 N2 O4, lgt=65.01, overall=65.01]       | (425.14667, 2893.3298) | (426.14532, 606.812)   | (427.1621, 53 C26 H20 N2 O4        | FindByFormula | 5 +  | 424.1384  | 17.99406  |
| C26 H23 N6 O3 P     | C26 H23 N6 O3 P     | [C26 H23 N6 O3 P, lgt=90.09, overall=90.09]     | (499.16473, 14611.394) | (500.16733, 4405.0107) | (501.17004, 1 C26 H23 N6 O3 P      | FindByFormula | 28 + | 498.1568  | 18.394302 |
| C26 H24 O2          | C26 H24 O2          | [C26 H24 O2, lgt=94.62, overall=94.62]          | (519.18457, 3820.564)  | (520.18793, 922.8247)  | (521.18506, 17 C26 H24 O2          | FindByFormula | 28 + | 518.1774  | 21.019137 |
| C26 H26 N10 S       | C26 H26 N10 S       | [C26 H26 N10 S, lgt=64.14, overall=64.14]       | (511.21338, 8028.909)  | (512.2159, 2741.4075)  | (513.2259, 647 C26 H26 N10 S       | FindByFormula | 26 + | 510.2205  | 19.974605 |
| C26 H26 N2 O3 P2    | C26 H26 N2 O3 P2    | [C26 H26 N2 O3 P2, lgt=86.82, overall=86.82]    | (477.14996, 3548.2698) | (478.15387, 988.2878)  | (479.1539, 243 C26 H26 N2 O3 P2    | FindByFormula | 28 + | 476.1426  | 17.457865 |
| C26 H27 C1 O5       | C26 H27 C1 O5       | [C26 H27 C1 O5, lgt=53.71, overall=53.71]       | (455.16226, 3984.2031) | (456.16605, 1103.8689) | (457.1616, 14 C26 H27 C1 O5        | FindByFormula | 26 + | 454.1554  | 20.600399 |
| C26 H28 N6 O S2     | C26 H28 N6 O S2     | [C26 H28 N6 O S2, lgt=65.03, overall=65.03]     | (505.1829, 4137.5283)  | (506.18477, 1256.924)  | (507.1892, 193 C26 H28 N6 O S2     | FindByFormula | 27 + | 504.1795  | 18.72028  |
| C26 H30 N14 O P2    | C26 H30 N14 O P2    | [C26 H30 N14 O P2, lgt=99.39, overall=99.39]    | (617.22833, 2030.565)  | (618.22845, 772.8628)  | (619.2311, 210 C26 H30 N14 O P2    | FindByFormula | 8 +  | 616.2196  | 4.250602  |
| C26 H31 N2 O3 P S   | C26 H31 N2 O3 P S   | [C26 H31 N2 O3 P S, lgt=76.81, overall=76.81]   | (451.21625, 1911.064)  | (452.2205, 481.956)    | (453.22155, 35 C26 H31 N2 O3 P S   | FindByFormula | 28 + | 450.2206  | 6.580819  |
| C26 H33 O6 P S      | C26 H33 O6 P S      | [C26 H33 O6 P S, lgt=66.88, overall=66.88]      | (607.37564, 3019.7498) | (608.3784, 1013.4087)  | (609.37462, 261 C26 H33 O6 P S     | FindByFormula | 24 + | 506.3681  | 18.405487 |
| C26 H35 N11         | C26 H35 N11         | [C26 H35 N11, lgt=62.91, overall=62.91]         | (502.3153, 12677.458)  | (503.31766, 4445.737)  | (504.31854, 112 C26 H35 N11        | FindByFormula | 26 + | 501.3072  | 18.39347  |
| C26 H35 N19 O       | C26 H35 N19 O       | [C26 H35 N19 O, lgt=76.70, overall=76.70]       | (630.3325, 2080.377)   | (631.3337, 950.0429)   | (632.32996, 325. C26 H35 N19 O     | FindByFormula | 9 +  | 629.3257  | 21.225883 |
| C26 H35 O4 P3       | C26 H35 O4 P3       | [C26 H35 O4 P3, lgt=72.67, overall=72.67]       | (505.18295, 4800.9756) | (506.18637, 1445.1868) | (507.19247, 2 C26 H35 O4 P3        | FindByFormula | 28 + | 504.1756  | 19.248352 |
| C26 H36 O5          | C26 H36 O5          | [C26 H36 O5, lgt=77.36, overall=77.36]          | (429.26416, 4177.673)  | (430.26868, 1359.2064) | (431.26828, 2 C26 H36 O5           | FindByFormula | 12 + | 428.2656  | 22.335665 |
| C26 H37 N6 O6       | C26 H37 N6 O6       | [C26 H37 N6 O6, lgt=99.17, overall=99.17]       | (460.2697, 57484.758)  | (461.27274, 16609.936) | (462.2754, 31 C26 H37 N6 O6        | FindByFormula | 28 + | 459.2623  | 19.87124  |
| C26 H37 N12 O P     | C26 H37 N12 O P     | [C26 H37 N12 O P, lgt=92.34, overall=92.34]     | (655.30383, 8167.7646) | (656.3068, 3063.5759)  | (657.3086, 39 C26 H37 N12 O P      | FindByFormula | 28 + | 654.3079  | 19.73249  |
| C26 H38 N10         | C26 H38 N10         | [C26 H38 N10, lgt=84.41, overall=84.41]         | (491.33612, 6652.76)   | (492.3395, 21733.891)  | (493.34186, 365 C26 H38 N10        | FindByFormula | 17 + | 490.3329  | 5.498105  |
| C26 H39 N3 O6       | C26 H39 N3 O6       | [C26 H39 N3 O6, lgt=96.60, overall=96.60]       | (490.29117, 36682.98)  | (491.29468, 9365.211)  | (492.2977, 1856 C26 H39 N3 O6      | FindByFormula | 28 + | 489.2836  | 21.935554 |
| C26 H40 S           | C26 H40 S           | [C26 H40 S, lgt=47.53, overall=47.53]           | (385.29187, 43118.81)  | (386.29398, 10974.433) | (387.28635, 278 C26 H40 S          | FindByFormula | 25 + | 384.2854  | 22.35329  |
| C26 H42 N6 O4       | C26 H42 N6 O4       | [C26 H42 N6 O4, lgt=98.06, overall=98.06]       | (503.33414, 14103.052) | (504.33734, 4550.0347) | (505.336, 193 C26 H42 N6 O4        | FindByFormula | 28 + | 500.3261  | 17.901081 |
| C26 H42 N6 O5       | C26 H42 N6 O5       | [C26 H42 N6 O5, lgt=99.59, overall=99.59]       | (519.3295, 112282.305) | (520.3326, 33958.586)  | (521.3348, 696 C26 H42 N6 O5       | FindByFormula | 28 + | 518.3217  | 17.782179 |
| C26 H44 N14 P4      | C26 H44 N14 P4      | [C26 H44 N14 P4, lgt=91.21, overall=91.21]      | (671.29095, 181.624)   | (672.29178, 1813.034)  | (673.29259, 21 C26 H44 N14 P4      | FindByFormula | 6 +  | 670.291   | 20.356282 |
| C26 H44 N23 P       | C26 H44 N23 P       | [C26 H44 N23 P, lgt=45.83, overall=45.83]       | (710.3389, 123.97)     | (711.3399, 79.994)     | (712.33848, 6 C26 H44 N23 P        | FindByFormula | 6 +  | 709.3865  | 3.6179929 |
| C26 H44 N7          |                     |                                                 |                        |                        |                                    |               |      |           |           |

|                    |                    |                                                             |                                                             |                    |               |      |          |            |
|--------------------|--------------------|-------------------------------------------------------------|-------------------------------------------------------------|--------------------|---------------|------|----------|------------|
| C29 H46 N7 O P3    | C29 H46 N7 O P3    | [C29 H46 N7 O P3, t <sub>rt</sub> =93.20, overall=93.20]    | (602.3043, 1811.0023)(603.3064, 824.8014)(564.3034, 31)     | C29 H46 N7 O P3    | FindByFormula | 8 +  | 601.2663 | 18.94598   |
| C29 H46 O4         | C29 H46 O4         | [C29 H46 O4, t <sub>rt</sub> =87.82, overall=87.82]         | (459.34604, 2092.8608)(460.34702, 750.98035)(461.34476, 1)  | C29 H46 O4         | FindByFormula | 8 +  | 488.3778 | 19.47906   |
| C29 H47 N5 O3 P2 S | C29 H47 N5 O3 P2 S | [C29 H47 N5 O3 P2 S, t <sub>rt</sub> =77.73, overall=77.73] | (608.295, 8022.244)(609.2961, 2802.8435)(610.3056, 1790.0)  | C29 H47 N5 O3 P2 S | FindByFormula | 19 + | 607.2872 | 21.76849   |
| C29 H47 O3 P S2    | C29 H47 O3 P S2    | [C29 H47 O3 P S2, t <sub>rt</sub> =25.38, overall=25.38]    | (571.3488, 4395.209)(572.2535, 1478.9712)(573.2594, 461)    | C29 H47 O3 P S2    | FindByFormula | 24 + | 570.2149 | 17.22707   |
| C29 H48 N O8 P     | C29 H48 N O8 P     | [C29 H48 N O8 P, t <sub>rt</sub> =85.75, overall=85.75]     | (570.2185, 13343.78)(571.2324, 4346.2324)(572.2397, 226)    | C29 H48 N O8 P     | FindByFormula | 15 + | 560.3109 | 22.46686   |
| C29 H49 N3 P2 S    | C29 H49 N3 P2 S    | [C29 H49 N3 P2 S, t <sub>rt</sub> =59.44, overall=59.44]    | (534.31995, 3557.5574)(535.3228, 1375.92)(536.3176, 377)    | C29 H49 N3 P2 S    | FindByFormula | 24 + | 533.3128 | 21.82452   |
| C29 H49 N4 O P S3  | C29 H49 N4 O P S3  | [C29 H49 N4 O P S3, t <sub>rt</sub> =66.78, overall=66.78]  | (597.2899, 2812.4185)(598.2901, 932.72925)(599.2914, 529)   | C29 H49 N4 O P S3  | FindByFormula | 26 + | 596.2821 | 20.11911   |
| C29 H50 N5 O2 P S3 | C29 H50 N5 O2 P S3 | [C29 H50 N5 O2 P S3, t <sub>rt</sub> =81.99, overall=81.99] | (628.2942, 2506.2427)(629.2975, 1092.6958)(630.2959, 608)   | C29 H50 N5 O2 P S3 | FindByFormula | 19 + | 627.2884 | 22.10819   |
| C29 H50 N6 O7      | C29 H50 N6 O7      | [C29 H50 N6 O7, t <sub>rt</sub> =99.12, overall=99.12]      | (595.382, 147048.36)(596.38513, 49834.73)(597.38715, 1107)  | C29 H50 N6 O7      | FindByFormula | 25 + | 596.3754 | 22.220516  |
| C29 H50 N7 P S2    | C29 H50 N7 P S2    | [C29 H50 N7 P S2, t <sub>rt</sub> =88.31, overall=88.31]    | (592.33466, 4999.924)(593.33795, 1908.0178)(594.33527, 772) | C29 H50 N7 P S2    | FindByFormula | 20 + | 592.3342 | 22.219652  |
| C29 H55 N3 O3 S3   | C29 H55 N3 O3 S3   | [C29 H55 N3 O3 S3, t <sub>rt</sub> =58.06, overall=58.06]   | (590.3473, 2597.9307)(591.35016, 1411.2786)(592.3442, 123)  | C29 H55 N3 O3 S3   | FindByFormula | 28 + | 589.3361 | 22.40359   |
| C29 H56 S4         | C29 H56 S4         | [C29 H56 S4, t <sub>rt</sub> =40.50, overall=40.50]         | (533.3319, 50.59)(571.2873, 177.51)(555.3072, 11.0)         | C29 H56 S4         | FindByFormula | 1 +  | 593.3322 | 3.6031847  |
| C29 H58 N2 O S3    | C29 H58 N2 O S3    | [C29 H58 N2 O S3, t <sub>rt</sub> =66.72, overall=66.72]    | (547.3785, 4486.8755)(548.37805, 1612.5128)(549.37695, 23)  | C29 H58 N2 O S3    | FindByFormula | 22 + | 546.3764 | 22.07185   |
| C29 H60 N11 O2 P3  | C29 H60 N11 O2 P3  | [C29 H60 N11 O2 P3, t <sub>rt</sub> =40.05, overall=40.05]  | (688.4158, 2087.109)(689.42017, 1031.5049)(690.4306, 214)   | C29 H60 N11 O2 P3  | FindByFormula | 21 + | 687.4086 | 22.564327  |
| C29 H61 N O P S2   | C29 H61 N O P S2   | [C29 H61 N O P S2, t <sub>rt</sub> =87.76, overall=87.76]   | (598.3476, 11672.598)(599.35034, 4297.727)(600.34674, 164)  | C29 H61 N O P S2   | FindByFormula | 22 + | 597.3411 | 22.61362   |
| C29 H61 N2 S       | C29 H61 N2 S       | [C29 H61 N2 S, t <sub>rt</sub> =94.22, overall=94.22]       | (732.5552, 3024.6013)(733.5588, 1546.6887)(734.5597, 524)   | C29 H61 N2 S       | FindByFormula | 17 + | 731.5488 | 24.352007  |
| C29 H62 N8 O S3    | C29 H62 N8 O S3    | [C29 H62 N8 O S3, t <sub>rt</sub> =42.42, overall=42.42]    | (635.4296, 2907.3025)(636.4328, 1127.9559)(637.4360, 32)    | C29 H62 N8 O S3    | FindByFormula | 25 + | 632.4363 | 22.135346  |
| C29 H64 N12 O3 S2  | C29 H64 N12 O3 S2  | [C29 H64 N12 O3 S2, t <sub>rt</sub> =28.05, overall=28.05]  | (693.4741, 14900.701)(694.47656, 5999.735)(695.4655, 284)   | C29 H64 N12 O3 S2  | FindByFormula | 27 + | 692.4675 | 22.438261  |
| C3 H10 N3 O2 P     | C3 H10 N3 O2 P     | [C3 H10 N3 O2 P, t <sub>rt</sub> =92.75, overall=92.75]     | (152.05824, 19421.959)(153.06065, 1622.8419)(154.05824, 4)  | C3 H10 N3 O2 P     | FindByFormula | 16 + | 151.0511 | 0.9337519  |
| C3 H12 N4 O        | C3 H12 N4 O        | [C3 H12 N4 O, t <sub>rt</sub> =86.29, overall=86.29]        | (169.0942, 3267.5977)(170.09372, 711.6741)(171.09508, 11)   | C3 H12 N4 O        | FindByFormula | 25 + | 168.0688 | 0.57720083 |
| C3 H13 N7 O S      | C3 H13 N7 O S      | [C3 H13 N7 O S, t <sub>rt</sub> =17.32, overall=17.32]      | (196.09709, 3011.4944)(197.0935, 492.821)(198.0911, 449)    | C3 H13 N7 O S      | FindByFormula | 20 + | 195.0983 | 0.30510094 |
| C3 H7 N            | C3 H7 N            | [C3 H7 N, t <sub>rt</sub> =33.68, overall=33.68]            | (58.065517, 11715.69)(59.06838, 407.24936)(60.0685, 3405)   | C3 H7 N            | FindByFormula | 16 + | 57.0583  | 4.187526   |
| C3 H9 N2 O2 P      | C3 H9 N2 O2 P      | [C3 H9 N2 O2 P, t <sub>rt</sub> =84.94, overall=84.94]      | (137.0467, 47.998)(138.0459, 3161.63)(139.0465, 519)        | C3 H9 N2 O2 P      | FindByFormula | 28 + | 136.0398 | 1.237206   |
| C3 H9 N2 O4 P      | C3 H9 N2 O4 P      | [C3 H9 N2 O4 P, t <sub>rt</sub> =92.98, overall=92.98]      | (169.0369, 51599.06)(170.04153, 4617.5986)(171.03905, 537)  | C3 H9 N2 O4 P      | FindByFormula | 23 + | 168.0288 | 1.0356109  |
| C3 H9 N3 O2        | C3 H9 N3 O2        | [C3 H9 N3 O2, t <sub>rt</sub> =55.66, overall=55.66]        | (120.07666, 12472.331)(121.080414, 891.69)(122.08048, 193)  | C3 H9 N3 O2        | FindByFormula | 15 + | 119.0686 | 0.6619355  |
| C3 H9 N5 O         | C3 H9 N5 O         | [C3 H9 N5 O, t <sub>rt</sub> =82.26, overall=82.26]         | (132.08757, 170225.88)(133.09033, 9722.79)(134.08876, 13)   | C3 H9 N5 O         | FindByFormula | 11 + | 131.0913 | 0.6656373  |
| C3 H10 N3 O5 P S   | C3 H10 N3 O5 P S   | [C3 H10 N3 O5 P S, t <sub>rt</sub> =88.98, overall=88.98]   | (647.93866, 2449.02)(648.93994, 807.678)(649.9446, 147.8)   | C3 H10 N3 O5 P S   | FindByFormula | 5 +  | 646.933  | 20.786028  |
| C3 H28 P2          | C3 H28 P2          | [C3 H28 P2, t <sub>rt</sub> =70.42, overall=70.42]          | (451.1751, 3132.39)(452.17874, 917.15546)(453.18185, 399)   | C3 H28 P2          | FindByFormula | 5 +  | 450.1686 | 17.914902  |
| C3 H33 N7 O2       | C3 H33 N7 O2       | [C3 H33 N7 O2, t <sub>rt</sub> =71.02, overall=71.02]       | (524.27655, 3330.961)(525.2802, 1235.983)(526.2834, 670)    | C3 H33 N7 O2       | FindByFormula | 22 + | 523.2675 | 22.26179   |
| C3 H36 O6 S        | C3 H36 O6 S        | [C3 H36 O6 S, t <sub>rt</sub> =48.88, overall=48.88]        | (525.23016, 6499.4937)(526.2344, 1909.1539)(527.246, 298)   | C3 H36 O6 S        | FindByFormula | 18 + | 524.2222 | 22.217936  |
| C3 H37 N13 O8 S    | C3 H37 N13 O8 S    | [C3 H37 N13 O8 S, t <sub>rt</sub> =96.65, overall=96.65]    | (740.26935, 1845.665)(741.2723, 761.2829)(742.2695, 299)    | C3 H37 N13 O8 S    | FindByFormula | 24 + | 739.2638 | 22.040712  |
| C3 H38 N6 O6       | C3 H38 N6 O6       | [C3 H38 N6 O6, t <sub>rt</sub> =91.64, overall=91.64]       | (579.2929, 10864.861)(580.2961, 4032.2383)(581.2968, 1226)  | C3 H38 N6 O6       | FindByFormula | 10 + | 578.2585 | 20.754572  |
| C3 H39 N5 P2       | C3 H39 N5 P2       | [C3 H39 N5 P2, t <sub>rt</sub> =38.45, overall=38.45]       | (532.2778, 329.567)(533.27576, 237.99284)(534.2856, 151)    | C3 H39 N5 P2       | FindByFormula | 28 + | 531.2718 | 21.672529  |
| C3 H40 N13 P3      | C3 H40 N13 P3      | [C3 H40 N13 P3, t <sub>rt</sub> =83.03, overall=83.03]      | (676.28345, 1317.246)(677.2877, 708.2051)(678.283, 658.81)  | C3 H40 N13 P3      | FindByFormula | 16 + | 675.2775 | 21.798235  |
| C3 H40 S5          | C3 H40 S5          | [C3 H40 S5, t <sub>rt</sub> =11.88, overall=11.88]          | (633.29282, 3039.8765)(634.2904, 1065.995)(635.2924, 693)   | C3 H40 S5          | FindByFormula | 6 +  | 634.2929 | 22.386541  |
| C3 H41 N14 O3 P3   | C3 H41 N14 O3 P3   | [C3 H41 N14 O3 P3, t <sub>rt</sub> =86.84, overall=86.84]   | (739.2769, 1843.1266)(740.2811, 907.954)(741.2854, 396)     | C3 H41 N14 O3 P3   | FindByFormula | 6 +  | 738.2766 | 17.094946  |
| C3 H41 N6 O3 P     | C3 H41 N6 O3 P     | [C3 H41 N6 O3 P, t <sub>rt</sub> =94.65, overall=94.65]     | (565.3048, 17942.209)(566.30804, 6028.6133)(567.30896, 16)  | C3 H41 N6 O3 P     | FindByFormula | 26 + | 564.2977 | 25.44424   |
| C3 H43 N18 P3      | C3 H43 N18 P3      | [C3 H43 N18 P3, t <sub>rt</sub> =75.72, overall=75.72]      | (749.3211, 3341.6748)(750.3213, 1549.7667)(751.3274, 564)   | C3 H43 N18 P3      | FindByFormula | 6 +  | 748.3147 | 21.15525   |
| C3 H44 N O2 P S2   | C3 H44 N O2 P S2   | [C3 H44 N O2 P S2, t <sub>rt</sub> =47.45, overall=47.45]   | (546.25977, 3490.3848)(547.2657, 1128.0116)(548.27396, 21)  | C3 H44 N O2 P S2   | FindByFormula | 25 + | 545.2544 | 22.028856  |
| C3 H44 N O11       | C3 H44 N O11       | [C3 H44 N O11, t <sub>rt</sub> =97.10, overall=97.10]       | (637.31024, 4264.832)(638.3196, 2032.228)(639.3199, 542)    | C3 H44 N O11       | FindByFormula | 22 + | 636.2994 | 22.538685  |
| C3 H45 N5 O7 S2    | C3 H45 N5 O7 S2    | [C3 H45 N5 O7 S2, t <sub>rt</sub> =90.84, overall=90.84]    | (652.28335, 3330.961)(653.2907, 1119.9216)(654.2936, 700)   | C3 H45 N5 O7 S2    | FindByFormula | 25 + | 651.2753 | 22.26179   |
| C3 H48 N6 O15      | C3 H48 N6 O15      | [C3 H48 N6 O15, t <sub>rt</sub> =97.17, overall=97.17]      | (733.3261, 4611.3833)(734.32916, 2196.7197)(735.3318, 776)  | C3 H48 N6 O15      | FindByFormula | 11 + | 732.3181 | 22.53319   |
| C3 H48 N7 P S      | C3 H48 N7 P S      | [C3 H48 N7 P S, t <sub>rt</sub> =78.94, overall=78.94]      | (570.3512, 13239.536)(571.3548, 4955.2705)(572.34863, 542)  | C3 H48 N7 P S      | FindByFormula | 14 + | 569.3454 | 22.469193  |
| C3 H50 N2 P2       | C3 H50 N2 P2       | [C3 H50 N2 P2, t <sub>rt</sub> =56.03, overall=56.03]       | (501.3514, 898.8767)(502.35077, 319.62997)(503.30756, 529)  | C3 H50 N2 P2       | FindByFormula | 9 +  | 500.3418 | 21.91917   |
| C3 H50 N7 O2 P S2  | C3 H50 N7 O2 P S2  | [C3 H50 N7 O2 P S2, t <sub>rt</sub> =84.56, overall=84.56]  | (636.3264, 5661.851)(637.3329, 1984.5176)(638.3336, 714)    | C3 H50 N7 O2 P S2  | FindByFormula | 26 + | 635.3224 | 22.23822   |
| C3 H51 N O16       | C3 H51 N O16       | [C3 H51 N O16, t <sub>rt</sub> =86.53, overall=86.53]       | (682.3251, 6702.935)(683.2587, 3124.4077)(684.2551, 877)    | C3 H51 N O16       | FindByFormula | 26 + | 681.3206 | 22.69649   |
| C3 H51 O6 P S      | C3 H51 O6 P S      | [C3 H51 O6 P S, t <sub>rt</sub> =85.42, overall=85.42]      | (530.3117, 6818.975)(531.3157, 3241.2044)(532.3157, 723)    | C3 H51 O6 P S      | FindByFormula | 20 + | 530.3117 | 22.56139   |
| C3 H53 N4 O P S    | C3 H53 N4 O P S    | [C3 H53 N4 O P S, t <sub>rt</sub> =98.37, overall=98.37]    | (641.2964, 6478.078)(642.30029, 2191.8807)(643.30426, 360)  | C3 H53 N4 O P S    | FindByFormula | 8 +  | 648.4711 | 22.68411   |
| C3 H53 N4 O2 P S   | C3 H53 N4 O2 P S   | [C3 H53 N4 O2 P S, t <sub>rt</sub> =67.09, overall=67.09]   | (565.307, 6707.558)(566.3689, 2540.9473)(567.36115, 1002)   | C3 H53 N4 O2 P S   | FindByFormula | 22 + | 564.3601 | 22.374556  |
| C3 H55 N O5 P4     | C3 H55 N O5 P4     | [C3 H55 N O5 P4, t <sub>rt</sub> =77.79, overall=77.79]     | (634.3099, 19596.418)(635.31396, 6807.022)(636.3235, 2932)  | C3 H55 N O5 P4     | FindByFormula | 28 + | 633.3019 | 22.102978  |
| C3 H56 N2 P6       | C3 H56 N2 P6       | [C3 H56 N2 P6, t <sub>rt</sub> =89.41, overall=89.41]       | (631.2951, 2703.8699)(632.2987, 960.5571)(633.30066, 52)    | C3 H56 N2 P6       | FindByFormula | 7 +  | 630.3262 | 15.934827  |
| C3 H57 N O2 S4     | C3 H57 N O2 S4     | [C3 H57 N O2 S4, t <sub>rt</sub> =61.80, overall=61.80]     | (592.3328, 4076.604)(593.33795, 1634.3705)(594.3327, 623)   | C3 H57 N O2 S4     | FindByFormula | 22 + | 591.3251 | 22.205902  |
| C3 H57 N O4 P S3   | C3 H57 N O4 P S3   | [C3 H57 N O4 P S3, t <sub>rt</sub> =79.61, overall=79.61]   | (654.29944, 7003.045)(655.3078, 2745.589)(656.3088, 700)    | C3 H57 N O4 P S3   | FindByFormula | 25 + | 652.2988 | 22.30386   |
| C3 H58 N O N4 P    | C3 H58 N O N4 P    | [C3 H58 N O N4 P, t <sub>rt</sub> =81.64, overall=81.64]    | (608.32416, 2361.1936)(609.3295, 877.237)(610.3134, 252)    | C3 H58 N O N4 P    | FindByFormula | 6 +  | 607.3172 | 22.73773   |
| C3 H58 C1 N2 O3 P  | C3 H58 C1 N2 O3 P  | [C3 H58 C1 N2 O3 P, t <sub>rt</sub> =42.42, overall=42.42]  | (650.3191, 13665.849)(652.39435, 4668.7476)(653.3973, 144)  | C3 H58 C1 N2 O3 P  | FindByFormula | 26 + | 560.3894 | 22.303495  |
| C3 H59 N O4 S5     | C3 H59 N O4 S5     | [C3 H59 N O4 S5, t <sub>rt</sub> =73.47, overall=73.47]     | (658.3139, 2386.3743)(659.31445, 1186.0939)(660.3147, 776)  | C3 H59 N O4 S5     | FindByFormula | 27 + | 657.3012 | 22.130884  |
| C3 H61 N4 O3 P S   | C3 H61 N4 O3 P S   | [C3 H61 N4 O3 P S, t <sub>rt</sub> =74.78, overall=74.78]   | (589.42755, 19544.965)(590.4306, 6659.3804)(591.42847, 20)  | C3 H61 N4 O3 P S   | FindByFormula | 23 + | 588.42   | 22.77274   |
| C3 H61 N4 O4 P S   | C3 H61 N4 O4 P S   | [C3 H61 N4 O4 P S, t <sub>rt</sub> =77.67, overall=77.67]   | (605.42316, 28548.803)(606.42444, 9620.7807)(607.41565, 31) | C3 H61 N4 O4 P S   | FindByFormula | 28 + | 604.4153 | 22.41099   |
| C3 H62 N2 O5 P2 S  | C3 H62 N2 O5 P2 S  | [C3 H62 N2 O5 P2 S, t <sub>rt</sub> =46.22, overall=46.22]  | (652.39075, 43715.105)(626.3934, 1566.526)(627.3917, 680)   | C3 H62 N2 O5 P2 S  | FindByFormula | 20 + | 624.3829 | 22.88175   |
| C3 H62 N6 O4 S2    | C3 H62 N6 O4 S2    | [C3 H62 N6 O4 S2, t <sub>rt</sub> =32.17, overall=32.17]    | (619.4386, 8058.676)(620.44316, 3199.8937)(621.431, 119)    | C3 H62 N6 O4 S2    | FindByFormula | 22 + | 618.4308 | 22.63467   |
| C3 H63 N8 O P S2   | C3 H63 N8 O P S2   | [C3 H63 N8 O P S2, t <sub>rt</sub> =43.74, overall=43.74]   | (647.43915, 5660.9175)(648.4391, 2253.1677)(649.4351, 133)  | C3 H63 N8 O P S2   | FindByFormula | 24 + | 646.4322 | 22.606495  |
| C3 H64 N O2 P S3   | C3 H64 N O2 P S3   | [C3 H64 N O2 P S3, t <sub>rt</sub> =79.55, overall=79.55]   | (722.2857, 4872.0)(723.29193, 1695.9708)(724.29236, 457)    | C3 H64 N O2 P S3   | FindByFormula | 24 + | 721.2796 | 22.324274  |
| C3 H27 N4 O P S3   | C3 H27 N4 O P S3   | [C3 H27 N4 O P S3, t <sub>rt</sub> =71.20, overall=71.20]   | (599.1162, 4781.878)(600.1189, 1667.1137)(601.11896, 526)   | C3 H27 N4 O P S3   | FindByFormula | 22 + | 598.1104 | 21.43821   |
| C3 H30 N2          | C3 H30 N2          | [C3 H30 N2, t <sub>rt</sub> =71.72, overall=71.72]          | (431.24557, 2072.04)(432.24875, 557.8755)(433.24918, 605)   | C3 H30 N2          | FindByFormula | 9 +  | 430.2405 | 18.27835   |
| C3 H32 N O P       | C3 H32 N O P       | [C3 H32 N O P, t <sub>rt</sub> =82.75, overall=82.75]       | (466.2301, 1750.1504)(467.2323, 672.2391)(468.2317, 183)    | C3 H32 N O P       | FindByFormula | 22 + | 465.222  | 17.87285   |
| C3 H35 N S         | C3 H35 N S         | [C3 H35 N S, t <sub>rt</sub> =84.19, overall=84.19]         | (678.29196, 3071.2456)(679.29364, 1011.6416)(680.2929, 10)  | C3 H35 N S         | FindByFormula | 12 + | 677.2859 | 20.42958   |
| C3 H37 N9 O2 P2    | C3 H37 N9 O2 P2    | [C3 H37 N9 O2 P2, t <sub>rt</sub> =82.16, overall=82.16]    | (630.2637, 1468.453)(631.2685, 663.0967)(632.27325, 132)    | C3 H37 N9 O2 P2    | FindByFormula | 4 +  | 629.2584 | 20.274014  |
| C3 H37 N9 O6       | C3 H37 N9 O6       | [C3 H37 N9 O6, t <sub>rt</sub> =91.13, overall=91.13]       | (632.29584, 3936.5645)(                                     |                    |               |      |          |            |

|                    |                    |                                                 |                                                                              |                  |      |           |
|--------------------|--------------------|-------------------------------------------------|------------------------------------------------------------------------------|------------------|------|-----------|
| C34 H62 N10 O S2   | C34 H62 N10 O S2   | [C34 H62 N10 O S2, tigt=40.77, overall=40.77]   | (691.46484, 5402.4175)(692.46564, 2366.97588)(693.4624, 14 C34 H62 N10 O S2  | FindByFormula    | 15 + | 690.4555  |
| C34 H64 N4 P2 S    | C34 H64 N4 P2 S    | [C34 H64 N4 P2 S, tigt=96.69, overall=96.69]    | (623.43854, 3874.6714)(624.4379, 2370.094)(625.4424, 1172 C34 H64 N4 P2 S    | FindByFormula    | 22 + | 22.59458  |
| C34 H65 N4 O P S3  | C34 H65 N4 O P S3  | [C34 H65 N4 O P S3, tigt=60.80, overall=60.80]  | (673.41077, 1963.9186)(674.411, 792.923)(675.4086, 264.09 C34 H65 N4 O P S3  | FindByFormula    | 20 + | 672.4042  |
| C34 H68 N2 O9 S2   | C34 H68 N2 O9 S2   | [C34 H68 N2 O9 S2, tigt=57.94, overall=57.94]   | (713.4425, 1939.2037)(714.4437, 878.6655)(715.4423, 231 C34 H68 N2 O9 S2     | FindByFormula    | 27 + | 12.96007  |
| C34 H68 N2 S       | C34 H68 N2 S       | [C34 H68 N2 S, tigt=50.20, overall=50.20]       | (537.517, 1184.537)(538.5159, 4068.5007)(539.5156, 1703 C34 H68 N2 S         | FindByFormula    | 22 + | 25.34427  |
| C34 H69 N4 O5 P S  | C34 H69 N4 O5 P S  | [C34 H69 N4 O5 P S, tigt=66.90, overall=66.90]  | (677.47295, 15894.215)(678.48236, 6442.351)(679.47986, 23 C34 H69 N4 O5 P S  | FindByFormula    | 12 + | 676.4716  |
| C34 H70 N2 O9 S2   | C34 H70 N2 O9 S2   | [C34 H70 N2 O9 S2, tigt=70.34, overall=70.34]   | (715.4558, 322.5389)(716.4666, 503.5175)(717.4557, 225.0 C34 H70 N2 O9 S2    | FindByFormula    | 22 + | 674.4513  |
| C34 H73 N2 O2 P5 S | C34 H73 N2 O2 P5 S | [C34 H73 N2 O2 P5 S, tigt=66.08, overall=66.08] | (729.4132, 900.42)(730.4124, 351.25467)(731.41583, 107.3 C34 H73 N2 O2 P5 S  | FindByFormula    | 15 + | 728.404   |
| C34 H74 N7 P       | C34 H74 N7 P       | [C34 H74 N7 P, tigt=79.75, overall=79.75]       | (612.584, 6296.197)(613.5798, 1708.9485)(614.58154, 173.8 C34 H74 N7 P       | FindByFormula    | 7 +  | 611.5753  |
| C34 H9 N5 O5 P4    | C34 H9 N5 O5 P4    | [C34 H9 N5 O5 P4, tigt=77.53, overall=77.53]    | (691.36295, 1680.3685)(692.3581, 718.55)(693.36615, 411.4 C34 H9 N5 O5 P4    | FindByFormula    | 8 +  | 690.9554  |
| C35 H35 N5         | C35 H35 N5         | [C35 H35 N5, tigt=35.01, overall=35.01]         | (526.2897, 1682.637)(527.29114, 738.487)(528.29395, 296. C35 H35 N5          | FindByFormula    | 14 + | 525.2899  |
| C35 H37 N8 P3      | C35 H37 N8 P3      | [C35 H37 N8 P3, tigt=90.55, overall=90.55]      | (663.24384, 845.4825)(664.2471, 449.61432)(665.247, 168.1 C35 H37 N8 P3      | FindByFormula    | 8 +  | 662.2378  |
| C35 H40 N2 O4      | C35 H40 N2 O4      | [C35 H40 N2 O4, tigt=91.30, overall=91.30]      | (553.30597, 8269.608)(554.3088, 2913.211)(555.3088, 791.44 C35 H40 N2 O4     | FindByFormula    | 17 + | 552.2886  |
| C35 H40 N5 O4 P3   | C35 H40 N5 O4 P3   | [C35 H40 N5 O4 P3, tigt=82.00, overall=82.00]   | (688.23816, 1106.259)(689.2454, 615.39996)(690.2467, 247.1 C35 H40 N5 O4 P3  | FindByFormula    | 10 + | 687.23    |
| C35 H45 N3 O2 P2   | C35 H45 N3 O2 P2   | [C35 H45 N3 O2 P2, tigt=52.34, overall=52.34]   | (602.3051, 3064.8647)(603.30994, 1256.8679)(604.3055, 432 C35 H45 N3 O2 P2   | FindByFormula    | 6 +  | 601.297   |
| C35 H49 N17        | C35 H49 N17        | [C35 H49 N17, tigt=87.46, overall=87.46]        | (708.44214, 1574.0367)(709.4434, 776.1534)(710.4424, 252 C35 H49 N17         | FindByFormula    | 6 +  | 707.4343  |
| C35 H50 N O10 P S2 | C35 H50 N O10 P S2 | [C35 H50 N O10 P S2, tigt=87.80, overall=87.80] | (740.2465, 3049.864)(741.2711, 119.555)(742.2706, 20.55 C35 H50 N O10 P S2   | FindByFormula    | 25 + | 741.2393  |
| C35 H52 N O P3     | C35 H52 N O P3     | [C35 H52 N O P3, tigt=62.49, overall=62.49]     | (596.3534, 2248.777)(597.33417, 1111.5276)(598.34236, 10 C35 H52 N O P3      | FindByFormula    | 20 + | 595.3315  |
| C35 H60 S3         | C35 H60 S3         | [C35 H60 S3, tigt=82.83, overall=82.83]         | (577.3916, 2777.2605)(578.39233, 1038.56)(579.3909, 267. C35 H60 S3          | FindByFormula    | 20 + | 576.38    |
| C35 H62 N7 O4 P S2 | C35 H62 N7 O4 P S2 | [C35 H62 N7 O4 P S2, tigt=76.36, overall=76.36] | (740.4101, 7358.6523)(741.4149, 3239.4478)(742.418, 1439. C35 H62 N7 O4 P S2 | FindByFormula    | 21 + | 739.4033  |
| C35 H64 N6 S3      | C35 H64 N6 S3      | [C35 H64 N6 S3, tigt=47.01, overall=47.01]      | (665.4422, 1499.9268)(666.4413, 692.60895)(667.4351, 292. C35 H64 N6 S3      | FindByFormula    | 20 + | 664.4331  |
| C35 H70 O2 P4      | C35 H70 O2 P4      | [C35 H70 O2 P4, tigt=84.88, overall=84.88]      | (647.4355, 1188.3943)(648.4408, 640.7374)(649.43713, 46 C35 H70 O2 P4        | FindByFormula    | 23 + | 646.4271  |
| C36 H41 N3 O S     | C36 H41 N3 O S     | [C36 H41 N3 O S, tigt=84.21, overall=84.21]     | (564.3039, 6180.4595)(565.3073, 2237.326)(566.3088, 723. C36 H41 N3 O S      | FindByFormula    | 21 + | 565.3073  |
| C36 H43 N2 P       | C36 H43 N2 P       | [C36 H43 N2 P, tigt=1.83, overall=1.83]         | (535.32306, 1723.3307)(536.3243, 647.6984)(537.32104, 16 C36 H43 N2 P        | FindByFormula    | 26 + | 534.3152  |
| C36 H47 N3 O5 S3   | C36 H47 N3 O5 S3   | [C36 H47 N3 O5 S3, tigt=66.04, overall=66.04]   | (698.27167, 2359.2097)(699.2756, 1137.1311)(700.2738, 59 C36 H47 N3 O5 S3    | FindByFormula    | 25 + | 697.2688  |
| C36 H52 N3 O3 P S3 | C36 H52 N3 O3 P S3 | [C36 H52 N3 O3 P S3, tigt=58.73, overall=58.73] | (652.29767, 2697.0579)(703.30316, 1140.57)(704.29803, 46 C36 H52 N3 O3 P S3  | FindByFormula    | 12 + | 651.2954  |
| C36 H54 N5 O4 P    | C36 H54 N5 O4 P    | [C36 H54 N5 O4 P, tigt=44.56, overall=44.56]    | (652.40265, 338.739)(653.3912, 846.94)(654.3794, 305.85)(6 C36 H54 N5 O4 P   | FindByFormula    | 22 + | 701.3944  |
| C36 H54 N7 O4 P3   | C36 H54 N7 O4 P3   | [C36 H54 N7 O4 P3, tigt=59.4, overall=59.4]     | (742.34766, 584.5794)(743.345, 194.82875)(744.3491, 50.1 C36 H54 N7 O4 P3    | FindByFormula    | 28 + | 742.34766 |
| C36 H56 N6 O3 S    | C36 H56 N6 O3 S    | [C36 H56 N6 O3 S, tigt=83.30, overall=83.30]    | (663.4216, 5674.822)(664.421, 2383.322)(665.4157, 778.49 C36 H56 N6 O3 S     | FindByFormula    | 18 + | 662.4147  |
| C36 H64 S2         | C36 H64 S2         | [C36 H64 S2, tigt=79.62, overall=79.62]         | (561.44934, 8021.74)(562.4562, 2467.0938)(563.46136, 693. C36 H64 S2         | FindByFormula    | 26 + | 562.4473  |
| C36 H66 N O P      | C36 H66 N O P      | [C36 H66 N O P, tigt=33.27, overall=33.27]      | (560.4976, 2411.616)(561.49524, 1065.1914)(562.5027, 45 C36 H66 N O P        | FindByFormula    | 25 + | 559.4897  |
| C36 H66 N6 O4 P2   | C36 H66 N6 O4 P2   | [C36 H66 N6 O4 P2, tigt=35.82, overall=35.82]   | (709.46814, 1265.239)(710.4684, 579.9269)(711.4702, 221.9 C36 H66 N6 O4 P2   | FindByFormula    | 28 + | 708.4571  |
| C36 H69 N2 O3 P S3 | C36 H69 N2 O3 P S3 | [C36 H69 N2 O3 P S3, tigt=65.32, overall=65.32] | (705.42737, 781.3554)(706.431, 528.5262)(707.427, 199.87 C36 H69 N2 O3 P S3  | FindByFormula    | 19 + | 704.4277  |
| C36 H71 O P S4     | C36 H71 O P S4     | [C36 H71 O P S4, tigt=39.35, overall=39.35]     | (679.4211, 2642.8716)(680.4179, 1361.39)(681.41864, 1288 C36 H71 O P S4      | FindByFormula    | 22 + | 678.4157  |
| C36 H74 N4         | C36 H74 N4         | [C36 H74 N4, tigt=73.72, overall=73.72]         | (663.5975, 2092.8225)(664.60095, 805.1331)(665.5999, 265 C36 H74 N4          | FindByFormula    | 16 + | 662.5977  |
| C36 H78 N9 O P     | C36 H78 N9 O P     | [C36 H78 N9 O P, tigt=89.03, overall=89.03]     | (684.6177, 3104.5935)(685.6134, 1339.1167)(686.6147, 287 C36 H78 N9 O P      | FindByFormula    | 6 +  | 683.6062  |
| C37 H33 N10 P      | C37 H33 N10 P      | [C37 H33 N10 P, tigt=74.90, overall=74.90]      | (649.27026, 1449.1642)(650.2742, 605.652)(651.27106, 157 C37 H33 N10 P       | FindByFormula    | 26 + | 648.2626  |
| C37 H34 N O P      | C37 H34 N O P      | [C37 H34 N O P, tigt=54.02, overall=54.02]      | (504.2463, 2045.8761)(541.2501, 686.94165)(578.1988, 104. C37 H34 N O P      | FindByFormula    | 18 + | 539.2395  |
| C37 H36 N5 P3      | C37 H36 N5 P3      | [C37 H36 N5 P3, tigt=71.62, overall=71.62]      | (644.22833, 1881.5754)(645.2319, 801.5918)(646.2357, 170. C37 H36 N5 P3      | FindByFormula    | 11 + | 643.23    |
| C37 H39 N2 O P S   | C37 H39 N2 O P S   | [C37 H39 N2 O P S, tigt=85.54, overall=85.54]   | (605.2412, 2081.122)(606.2417, 862.0914)(607.2513, 203. C37 H39 N2 O P S     | FindByFormula    | 7 +  | 604.2412  |
| C37 H39 N5 O P2    | C37 H39 N5 O P2    | [C37 H39 N5 O P2, tigt=57.82, overall=57.82]    | (632.26855, 851.16)(633.2694, 355.14668)(634.27282, 615.4 C37 H39 N5 O P2    | FindByFormula    | 3 +  | 631.2583  |
| C37 H45 O3 P S     | C37 H45 O3 P S     | [C37 H45 O3 P S, tigt=69.75, overall=69.75]     | (601.2923, 2204.8596)(602.2925, 899.1162)(603.2945, 515.4 C37 H45 O3 P S     | FindByFormula    | 16 + | 602.2923  |
| C37 H47 N2 O P S   | C37 H47 N2 O P S   | [C37 H47 N2 O P S, tigt=75.70, overall=75.70]   | (713.2304, 77.5)(714.223, 28.16)                                             | C37 H47 N2 O P S | 1 +  | 690.2383  |
| C37 H47 N5 S       | C37 H47 N5 S       | [C37 H47 N5 S, tigt=25.79, overall=25.79]       | (594.3595, 3800.6392)(595.3679, 2971.7227)(596.3603, 819. C37 H47 N5 S       | FindByFormula    | 19 + | 593.3576  |
| C37 H49 N O S      | C37 H49 N O S      | [C37 H49 N O S, tigt=84.10, overall=84.10]      | (686.3256, 1567.4042)(687.3283, 855.73)(670.32605, 629.8 C37 H49 N O S       | FindByFormula    | 10 + | 667.323   |
| C37 H51 O11 P S    | C37 H51 O11 P S    | [C37 H51 O11 P S, tigt=91.33, overall=91.33]    | (636.2595, 6842.805)(637.2526, 2724.1737)(638.2523, 191.1 C37 H51 O11 P S    | FindByFormula    | 26 + | 734.2685  |
| C37 H51 O3 P S2    | C37 H51 O3 P S2    | [C37 H51 O3 P S2, tigt=91.33, overall=91.33]    | (639.3099, 2697.08)(640.3124, 1051.402)(641.3085, 305.5 C37 H51 O3 P S2      | FindByFormula    | 18 + | 638.3054  |
| C37 H52 S3         | C37 H52 S3         | [C37 H52 S3, tigt=35.34, overall=35.34]         | (593.33093, 1402.2585)(594.33057, 566.6205)(595.3326, 308 C37 H52 S3         | FindByFormula    | 21 + | 592.323   |
| C37 H56 N2 O2 P4   | C37 H56 N2 O2 P4   | [C37 H56 N2 O2 P4, tigt=46.54, overall=46.54]   | (685.3384, 1699.9702)(686.3384, 808.0376)(687.3456, 405.1 C37 H56 N2 O2 P4   | FindByFormula    | 28 + | 686.3261  |
| C37 H69 N8 O P S   | C37 H69 N8 O P S   | [C37 H69 N8 O P S, tigt=63.72, overall=63.72]   | (705.5116, 3986.2444)(706.51294, 1790.5076)(707.50287, 87 C37 H69 N8 O P S   | FindByFormula    | 17 + | 704.5027  |
| C37 H74 N4 O4 S3   | C37 H74 N4 O4 S3   | [C37 H74 N4 O4 S3, tigt=40.95, overall=40.95]   | (735.49615, 3267.1744)(736.49475, 1512.3003)(737.48535, 1 C37 H74 N4 O4 S3   | FindByFormula    | 22 + | 734.4927  |
| C37 H77 N2 O P S   | C37 H77 N2 O P S   | [C37 H77 N2 O P S, tigt=79.90, overall=79.90]   | (721.4792, 137.5444)(722.4894, 933.742)(723.4831, 34.36)( C37 H77 N2 O P S   | FindByFormula    | 22 + | 640.4722  |
| C37 H77 N4 O P S3  | C37 H77 N4 O P S3  | [C37 H77 N4 O P S3, tigt=67.60, overall=67.60]  | (724.50555, 12771.754)(725.50635, 5610.4326)(726.50134, 1 C37 H77 N4 O P S3  | FindByFormula    | 22 + | 720.5011  |
| C37 H79 N O2 P2    | C37 H79 N O2 P2    | [C37 H79 N O2 P2, tigt=33.59, overall=33.59]    | (742.56334, 993.63)(743.5757, 598.14)(744.5637, 594.56)(7 C37 H79 N O2 P2    | FindByFormula    | 5 +  | 741.5682  |
| C37 H80 N4 O2      | C37 H80 N4 O2      | [C37 H80 N4 O2, tigt=98.61, overall=98.61]      | (613.6325, 6079.2246)(614.6379, 2490.0671)(615.6423, 796. C37 H80 N4 O2      | FindByFormula    | 19 + | 612.6261  |
| C38 H23 N17        | C38 H23 N17        | [C38 H23 N17, tigt=75.50, overall=75.50]        | (718.23883, 930.62286)(719.244, 507.98288)(719.937, 67.9 C38 H23 N17         | FindByFormula    | 7 +  | 717.2328  |
| C38 H27 N15        | C38 H27 N15        | [C38 H27 N15, tigt=49.25, overall=49.25]        | (694.2617, 408.655)(695.2666, 94.4425)(712.2382, 239.243 C38 H27 N15         | FindByFormula    | 22 + | 694.2617  |
| C38 H35 N6 O5 P    | C38 H35 N6 O5 P    | [C38 H35 N6 O5 P, tigt=99.58, overall=99.58]    | (687.2486, 4725.875)(688.2522, 2106.482)(689.2555, 53 C38 H35 N6 O5 P        | FindByFormula    | 6 +  | 686.2474  |
| C38 H43 N O S      | C38 H43 N O S      | [C38 H43 N O S, tigt=60.24, overall=60.24]      | (604.4387, 3254.953)(605.437, 1609.6349)(606.4312, 813. C38 H43 N O S        | FindByFormula    | 21 + | 605.4312  |
| C38 H45 N P        | C38 H45 N P        | [C38 H45 N P, tigt=56.04, overall=56.04]        | (578.3113, 1545.3912)(579.3124, 925.5433)(580.30896, 314 C38 H45 N P         | FindByFormula    | 16 + | 577.3106  |
| C38 H46 N2 O6 P2 S | C38 H46 N2 O6 P2 S | [C38 H46 N2 O6 P2 S, tigt=19.45, overall=19.45] | (712.2619, 4009.8489)(722.2665, 1800.9606)(723.26984, 562 C38 H46 N2 O6 P2 S | FindByFormula    | 26 + | 720.2535  |
| C38 H46 O12 S      | C38 H46 O12 S      | [C38 H46 O12 S, tigt=84.51, overall=84.51]      | (727.2769, 9610.635)(728.28033, 3761.1018)(729.2848, 1013 C38 H46 O12 S      | FindByFormula    | 28 + | 726.271   |
| C38 H47 N2 O8 P    | C38 H47 N2 O8 P    | [C38 H47 N2 O8 P, tigt=93.95, overall=93.95]    | (691.31415, 7096.657)(692.3162, 2766.3777)(693.3255, 162 C38 H47 N2 O8 P     | FindByFormula    | 19 + | 690.3071  |
| C38 H49 N5 P2 S2   | C38 H49 N5 P2 S2   | [C38 H49 N5 P2 S2, tigt=89.00, overall=89.00]   | (702.2977, 2842.1228)(703.30225, 1202.7876)(704.29834, C38 H49 N5 P2 S2      | FindByFormula    | 23 + | 701.2951  |
| C38 H54 N O P S    | C38 H54 N O P S    | [C38 H54 N O P S, tigt=22.01, overall=22.01]    | (604.36755, 3034.3762)(605.374, 202.48762)(606.375, 113 C38 H54 N O P S      | FindByFormula    | 18 + | 605.375   |
| C38 H54 O11 S      | C38 H54 O11 S      | [C38 H54 O11 S, tigt=97.23, overall=97.23]      | (719.3433, 3317.5886)(720.3428, 1327.4976)(721.34607, 558 C38 H54 O11 S      | FindByFormula    | 8 +  | 718.3389  |
| C38 H57 N O3 P2    | C38 H57 N O3 P2    | [C38 H57 N O3 P2, tigt=32.73, overall=32.73]    | (638.3885, 17495.982)(639.3946, 9645.319)(640.3981, 2788. C38 H57 N O3 P2    | FindByFormula    | 21 + | 637.3808  |
| C38 H58 N5 O2 P S  | C38 H58 N5 O2 P S  | [C38 H58 N5 O2 P S, tigt=96.74, overall=96.74]  | (680.4106, 3832.7114)(681.4139, 1699.4672)(682.4126, 617. C38 H58 N5 O2 P S  | FindByFormula    | 7 +  | 679.4049  |
| C38 H60 N6 O4 S    | C38 H60 N6 O4 S    | [C38 H60 N6 O4 S, tigt=74.16, overall=74.16]    | (697.4855, 4807.789)(698.44666, 2172.1292)(699.443, 819. C38 H60 N6 O4 S     | FindByFormula    | 28 + | 696.4386  |
| C38 H62 O S2       | C38 H62 O S2       | [C38 H62 O S2, tigt=88.28, overall=88.28]       | (599.4299, 4200.3486)(600.4329, 2001.4363)(601.4288, 1078 C38 H62 O S2       | FindByFormula    | 23 + | 598.4269  |
| C38 H65 O9 P S     | C38 H65 O9 P S     | [C38 H65 O9 P S, tigt=59.41, overall=59.41]     | (729.4132, 937.2958)(729.4132, 1160.4542)(730.4132, 1160 C38 H65 O9 P S      | FindByFormula    | 21 + | 729.4132  |
| C38 H66 N2 O2 S4   | C38 H66 N2 O2 S4   | [C38 H66 N2 O2 S4, tigt=31.45, overall=31.45]   | (711.4072, 1403.1361)(712.4127, 976.4757)(713.405, 546.3 C38 H66 N2 O2 S4    | FindByFormula    | 11 + | 710.4052  |
| C38 H75 N7 O2      | C38 H75 N7 O2      | [C38 H75 N7 O2, tigt=81.43, overall=81.43]      | (662.6076, 2243.2234)(663.60675, 737.2067)(664.6085, 146 C38 H75 N7 O2       | FindByFormula    | 6 +  | 661.6021  |
| C38 H82 N6 P2      | C38 H82 N6 P2      | [C38 H82 N6 P2, tigt=82.07, overall=82.07]      | (685.6148, 84776.42)(686.6184, 38846.46)(687.6223, 9505.4 C38 H82 N6 P2      | FindByFormula    | 21 + | 684.609   |
| C38 H84 N7 O4 P    | C38 H84 N7 O4 P    | [C38 H84 N7 O4 P, tigt=84.77, overall=84.77]    | (734.63995, 1297.7686)(735.63916, 530.95)(736.637, 217.56 C38 H84 N7 O4 P    | FindByFormula    | 7 +  | 733.631   |
| C39 H30 N6         | C39 H30 N6         | [C39 H30 N6, tigt=86.51, overall=86.51]         | (638                                                                         |                  |      |           |

|                 |                 |                                             |                                                                           |               |      |           |            |
|-----------------|-----------------|---------------------------------------------|---------------------------------------------------------------------------|---------------|------|-----------|------------|
| C5 H7 N O3      | C5 H7 N O3      | [C5 H7 N O3, tqt=91.00, overall=91.00]      | (130.05046, 257425.7)(131.0538, 15341.034)(132.06252, 247.05 H7 N O3      | FindByFormula | 20 + | 129.0433  | 1.189201   |
| C5 H9 N O2      | C5 H9 N O2      | [C5 H9 N O2, tqt=90.46, overall=90.46]      | (116.07065, 81583.266)(117.0718, 5213.206)(118.0771, 29.875 C5 H9 N O2    | FindByFormula | 20 + | 115.0636  | 0.63614416 |
| C5 H9 N3        | C5 H9 N3        | [C5 H9 N3, tqt=31.25, overall=31.25]        | (112.08706, 35692.633)(113.0898, 4602.913)(114.08943, 15.05 H9 N3         | FindByFormula | 23 + | 111.0798  | 0.5667404  |
| C5 O H9 N3      | C5 O H9 N3      | [C5 O H9 N3, tqt=73.18, overall=73.18]      | (736.7431, 40120.757)(737.7468, 20551.217)(738.7499, 5.749 C5 O H9 N3     | FindByFormula | 20 + | 25.353846 | 25.353846  |
| C5 H54 O2       | C5 H54 O2       | [C5 H54 O2, tqt=94.71, overall=94.71]       | (735.4214, 2577.6559)(736.4256, 1506.6394)(737.4276, 95.54 H54 O2         | FindByFormula | 18 + | 734.418   | 734.418    |
| C6 H10 N6 O     | C6 H10 N6 O     | [C6 H10 N6 O, tqt=86.22, overall=86.22]     | (183.08971, 2386.7368)(184.0861, 225.52144)(185.0936, 53.06 H10 N6 O      | FindByFormula | 28 + | 182.0192  | 4.775386   |
| C6 H10 O4       | C6 H10 O4       | [C6 H10 O4, tqt=98.83, overall=98.83]       | (147.06555, 1991.7778)(148.06511, 104.55428)(149.0650, 2.06 H10 O4        | FindByFormula | 18 + | 146.0583  | 2.083996   |
| C6 H11 N O      | C6 H11 N O      | [C6 H11 N O, tqt=95.01, overall=95.01]      | (114.09137, 53106.758)(115.09388, 4297.3765)(116.0932, 25.06 H11 N O      | FindByFormula | 26 + | 113.0842  | 4.487415   |
| C6 H11 N O2 S   | C6 H11 N O2 S   | [C6 H11 N O2 S, tqt=97.49, overall=97.49]   | (162.0595, 5170.5913)(163.05779, 397.29736)(164.05931, 32.06 H11 N O2 S   | FindByFormula | 16 + | 161.0521  | 1.9606452  |
| C6 H12 N4 O     | C6 H12 N4 O     | [C6 H12 N4 O, tqt=62.23, overall=62.23]     | (205.09687, 2671.7386)(206.08994, 201.46696)(207.09735, 7.05 H12 N4 O     | FindByFormula | 23 + | 204.0827  | 7.933327   |
| C6 H12 N6       | C6 H12 N6       | [C6 H12 N6, tqt=89.68, overall=89.68]       | (169.1151, 5658.017)(170.12021, 456.94504)(171.1217, 53.06 H12 N6         | FindByFormula | 24 + | 168.1126  | 8.039398   |
| C6 H12 N6 O     | C6 H12 N6 O     | [C6 H12 N6 O, tqt=97.15, overall=97.15]     | (185.11485, 39278.402)(186.11806, 3590.627)(187.11668, 35.06 H12 N6 O     | FindByFormula | 28 + | 184.1078  | 10.05429   |
| C6 H12 N6 O3    | C6 H12 N6 O3    | [C6 H12 N6 O3, tqt=95.18, overall=95.18]    | (127.10501, 49453.426)(128.1084, 4619.847)(129.10791, 800.06 H12 N6 O3    | FindByFormula | 28 + | 216.098   | 3.548855   |
| C6 H13 C1 N6    | C6 H13 C1 N6    | [C6 H13 C1 N6, tqt=75.06, overall=75.06]    | (205.09769, 442335.0)(206.1004, 58660.777)(207.09248, 13.06 H13 C1 N6     | FindByFormula | 27 + | 204.0902  | 3.610258   |
| C6 H13 N O      | C6 H13 N O      | [C6 H13 N O, tqt=91.54, overall=91.54]      | (116.107086, 84411.73)(117.11026, 6366.4883)(118.1154, 5.06 H13 N O       | FindByFormula | 9 +  | 115.0997  | 0.9952329  |
| C6 H13 N O2     | C6 H13 N O2     | [C6 H13 N O2, tqt=95.67, overall=95.67]     | (102.12323, 66014.08)(103.12524, 47666.457)(104.12574, 4.00 H13 N O2      | FindByFormula | 20 + | 131.0975  | 1.6762455  |
| C6 H13 N5 O P5  | C6 H13 N5 O P5  | [C6 H13 N5 O P5, tqt=91.45, overall=91.45]  | (232.05275, 1525.889)(233.06355, 1095.4538)(234.07427, 960.06 H13 N5 O P5 | FindByFormula | 27 + | 231.0975  | 13.483130  |
| C6 H14 O3       | C6 H14 O3       | [C6 H14 O3, tqt=89.03, overall=89.03]       | (135.10065, 1017.71405)(136.10379, 65.409546)(137.10582, 6.06 H14 O3      | FindByFormula | 25 + | 134.0943  | 4.349765   |
| C6 H14 O4       | C6 H14 O4       | [C6 H14 O4, tqt=92.07, overall=92.07]       | (151.09521, 1927.4374)(152.09706, 160.27333)(153.09552, 4.06 H14 O4       | FindByFormula | 28 + | 150.089   | 2.2495933  |
| C6 H15 N3 O     | C6 H15 N3 O     | [C6 H15 N3 O, tqt=60.40, overall=60.40]     | (184.08527, 1616.6068)(185.0782, 204.727)(186.0865, 419.337 H15 N3 O      | FindByFormula | 3 +  | 145.1020  | 0.64600646 |
| C6 H15 N3 O2    | C6 H15 N3 O2    | [C6 H15 N3 O2, tqt=95.10, overall=95.10]    | (162.1234, 90191.82)(163.12642, 7324.6753)(164.12996, 120.06 H15 N3 O2    | FindByFormula | 15 + | 161.1169  | 6.061202   |
| C6 H4 O         | C6 H4 O         | [C6 H4 O, tqt=87.75, overall=87.75]         | (93.033646, 8628.143)(94.039375, 1008.67267)(95.041855, 5.06 H4 O         | FindByFormula | 19 + | 92.0267   | 8.669448   |
| C6 H4 O5        | C6 H4 O5        | [C6 H4 O5, tqt=89.19, overall=89.19]        | (205.98094, 1905.4092)(206.9858, 273.61655)(207.99212, 2.06 H4 O5         | FindByFormula | 25 + | 203.973   | 1.737379   |
| C6 H6 N4 O2     | C6 H6 N4 O2     | [C6 H6 N4 O2, tqt=76.82, overall=76.82]     | (167.05675, 5183.846)(168.05453, 497.13715)(169.0495, 701.06 H6 N4 O2     | FindByFormula | 8 +  | 165.049   | 2.188824   |
| C6 H6 O5        | C6 H6 O5        | [C6 H6 O5, tqt=98.33, overall=98.33]        | (159.0288, 74227.25)(160.03131, 5118.746)(161.03137, 2419.06 H6 O5        | FindByFormula | 19 + | 158.0217  | 1.1088475  |
| C6 H8 O3        | C6 H8 O3        | [C6 H8 O3, tqt=83.80, overall=83.80]        | (129.05501, 2165.7615)(130.05269, 415.5928)(131.0545, 57.06 H8 O3         | FindByFormula | 7 +  | 128.0473  | 2.0527208  |
| C6 H8 O3 P2     | C6 H8 O3 P2     | [C6 H8 O3 P2, tqt=97.34, overall=97.34]     | (191.06628, 15219.508)(192.06441, 1401.7445)(193.00189, 2.06 H8 O3 P2     | FindByFormula | 20 + | 189.9944  | 1.89944    |
| C6 H9 N O4      | C6 H9 N O4      | [C6 H9 N O4, tqt=76.81, overall=76.81]      | (160.06015, 107715.266)(161.06342, 8813.637)(162.06541, 1.06 H9 N O4      | FindByFormula | 7 +  | 159.0535  | 0.8844285  |
| C6 H9 N O5      | C6 H9 N O5      | [C6 H9 N O5, tqt=91.10, overall=91.10]      | (192.03255, 1372.6885)(193.03365, 1095.4538)(194.03489, 5.06 H9 N O5      | FindByFormula | 15 + | 190.0581  | 0.9010974  |
| C7 H10 N5 O2 P  | C7 H10 N5 O2 P  | [C7 H10 N5 O2 P, tqt=90.78, overall=90.78]  | (228.02367, 19807.555)(229.02678, 2816.8835)(230.02737, 3.00 H10 N5 O2 P  | FindByFormula | 8 +  | 227.0528  | 4.953084   |
| C7 H10 N6 O     | C7 H10 N6 O     | [C7 H10 N6 O, tqt=73.76, overall=73.76]     | (195.0999, 22353.738)(196.10144, 2310.1401)(197.09497, 53.07 H10 N6 O     | FindByFormula | 28 + | 194.0685  | 11.904492  |
| C7 H10 N6 O2    | C7 H10 N6 O2    | [C7 H10 N6 O2, tqt=89.41, overall=89.41]    | (211.09343, 1914.664)(212.09529, 2039.121)(213.10153, 889.07 H10 N6 O2    | FindByFormula | 8 +  | 210.0873  | 8.573759   |
| C7 H10 O2 S3    | C7 H10 O2 S3    | [C7 H10 O2 S3, tqt=75.05, overall=75.05]    | (222.99182, 4297.511)(223.9875, 693.693)(224.9815, 1070.07 H10 O2 S3      | FindByFormula | 20 + | 221.983   | 4.076561   |
| C7 H12 N2 O2 S  | C7 H12 N2 O2 S  | [C7 H12 N2 O2 S, tqt=92.74, overall=92.74]  | (189.06923, 127311.61)(190.07219, 14658.383)(191.07474, 1.00 H12 N2 O2 S  | FindByFormula | 20 + | 188.0227  | 3.6117263  |
| C7 H12 N6 O     | C7 H12 N6 O     | [C7 H12 N6 O, tqt=98.36, overall=98.36]     | (197.11446, 27087.849)(198.11734, 2841.3416)(199.11946, 3.00 H12 N6 O     | FindByFormula | 21 + | 196.1075  | 5.65554    |
| C7 H12 O2 P2    | C7 H12 O2 P2    | [C7 H12 O2 P2, tqt=97.27, overall=97.27]    | (223.02835, 22090.031)(224.03143, 2386.728)(225.0312, 47.00 H12 O2 P2     | FindByFormula | 20 + | 222.0629  | 8.6664505  |
| C7 H13 N O2     | C7 H13 N O2     | [C7 H13 N O2, tqt=90.86, overall=90.86]     | (144.10217, 127609.664)(145.10376, 11801.664)(146.10349, 0.00 H13 N O2    | FindByFormula | 18 + | 143.096   | 0.7890560  |
| C7 H13 N7       | C7 H13 N7       | [C7 H13 N7, tqt=90.10, overall=90.10]       | (196.12996, 4002.9673)(197.1283, 1011.7933)(198.12646, 89.07 H13 N7       | FindByFormula | 19 + | 195.1225  | 8.1156     |
| C7 H14 N O2     | C7 H14 N O2     | [C7 H14 N O2, tqt=97.42, overall=97.42]     | (143.11743, 4199.447)(144.11845, 541.3306)(145.11914, 87.87 C7 H14 N O2   | FindByFormula | 27 + | 142.1098  | 3.2588062  |
| C7 H14 N6 O2    | C7 H14 N6 O2    | [C7 H14 N6 O2, tqt=82.03, overall=82.03]    | (215.12532, 3856.0337)(216.12146, 319.5171)(217.12367, 61.00 H14 N6 O2    | FindByFormula | 27 + | 214.1182  | 7.2612743  |
| C7 H14 P2       | C7 H14 P2       | [C7 H14 P2, tqt=22.5, overall=22.5]         | (115.06528, 1534.3655)(116.06528, 79.70064)(117.06528, 4.00 H14 P2        | FindByFormula | 26 + | 116.06528 | 5.990581   |
| C7 H15 N O2     | C7 H15 N O2     | [C7 H15 N O2, tqt=22.67, overall=22.67]     | (146.11725, 5002.692)(147.11342, 3884.5234)(148.11256, 365.00 H15 N O2    | FindByFormula | 12 + | 145.1091  | 0.7967517  |
| C7 H15 N O3     | C7 H15 N O3     | [C7 H15 N O3, tqt=97.03, overall=97.03]     | (162.11269, 59214.324)(163.11456, 4583.0645)(164.11546, 5.00 H15 N O3     | FindByFormula | 24 + | 161.1052  | 6.0995714  |
| C7 H16 N8 O S   | C7 H16 N8 O S   | [C7 H16 N8 O S, tqt=79.63, overall=79.63]   | (261.12537, 9289.571)(262.1265, 1697.9567)(263.12557, 139.00 H16 N8 O S   | FindByFormula | 6 +  | 260.1162  | 5.22365    |
| C7 H17 N5 S     | C7 H17 N5 S     | [C7 H17 N5 S, tqt=95.29, overall=95.29]     | (204.12773, 210826.55)(205.13033, 22098.557)(206.13203, 2.00 H17 N5 S     | FindByFormula | 13 + | 203.1212  | 0.7530034  |
| C7 H18 C1 N5 O  | C7 H18 C1 N5 O  | [C7 H18 C1 N5 O, tqt=69.89, overall=69.89]  | (224.12865, 3604.622)(225.12892, 527.7308)(226.12244, 26.00 H18 C1 N5 O   | FindByFormula | 24 + | 223.1215  | 0.9957517  |
| C7 H18 O2 P2    | C7 H18 O2 P2    | [C7 H18 O2 P2, tqt=98.36, overall=98.36]    | (197.08513, 12717.121)(198.08809, 1399.2491)(199.09186, 4.00 H18 O2 P2    | FindByFormula | 22 + | 196.1077  | 5.65554    |
| C7 H19 N3       | C7 H19 N3       | [C7 H19 N3, tqt=94.97, overall=94.97]       | (146.11675, 5402.586)(147.11617, 5300.445)(148.11666, 241.00 H19 N3       | FindByFormula | 22 + | 145.1577  | 0.5292556  |
| C7 H20 N5 O2 P  | C7 H20 N5 O2 P  | [C7 H20 N5 O2 P, tqt=60.96, overall=60.96]  | (238.14156, 5178.6655)(239.14238, 1028.1906)(240.14365, 1.00 H20 N5 O2 P  | FindByFormula | 26 + | 237.1342  | 12.217126  |
| C7 H21 N3 O3 P2 | C7 H21 N3 O3 P2 | [C7 H21 N3 O3 P2, tqt=93.91, overall=93.91] | (258.11334, 15733.461)(259.11685, 1578.637)(260.11697, 3.00 H21 N3 O3 P2  | FindByFormula | 16 + | 257.104   | 0.64688903 |
| C7 H3 N O6 S    | C7 H3 N O6 S    | [C7 H3 N O6 S, tqt=95.61, overall=95.61]    | (229.97954, 16800.072)(230.97923, 1748.4807)(231.9795, 1.00 H3 N O6 S     | FindByFormula | 21 + | 228.9688  | 0.2300355  |
| C7 H3 P S3      | C7 H3 P S3      | [C7 H3 P S3, tqt=69.10, overall=69.10]      | (214.9176, 74369.391)(215.9177, 2950.651)(216.92154, 1804.20 H3 P S3      | FindByFormula | 21 + | 213.9114  | 1.5430094  |
| C7 H4 O2        | C7 H4 O2        | [C7 H4 O2, tqt=99.05, overall=99.05]        | (131.07867, 99849.071)(132.02455, 7385.5015)(133.03645, 0.00 H4 O2        | FindByFormula | 20 + | 120.0201  | 8.620138   |
| C7 H6 O2        | C7 H6 O2        | [C7 H6 O2, tqt=99.10, overall=99.10]        | (123.04468, 22285.73)(124.04799, 1936.9875)(125.04625, 1.00 H6 O2         | FindByFormula | 10 + | 122.0372  | 1.2647005  |
| C7 H6 O4        | C7 H6 O4        | [C7 H6 O4, tqt=83.84, overall=83.84]        | (155.0327, 6104.115)(156.04008, 920.01105)(157.0321, 190.00 H7 H6 O4      | FindByFormula | 10 + | 154.0254  | 2.970322   |
| C7 H7 N O       | C7 H7 N O       | [C7 H7 N O, tqt=32.77, overall=32.77]       | (122.0595, 500.92)(123.059, 206.41)                                       | C7 H7 N O     | 1 +  | 122.0595  | 2.4820294  |
| C7 H8 N2 O      | C7 H8 N2 O      | [C7 H8 N2 O, tqt=89.77, overall=89.77]      | (153.06549, 34035.05)(154.06524, 2229.422)(155.06648, 508.00 H8 N2 O      | FindByFormula | 8 +  | 151.0579  | 1.9189384  |
| C7 H8 N4 O2     | C7 H8 N4 O2     | [C7 H8 N4 O2, tqt=98.85, overall=98.85]     | (181.07285, 34666.434)(182.076, 3883.644)(183.08177, 411.00 H8 N4 O2      | FindByFormula | 25 + | 180.0659  | 4.1075425  |
| C7 H8 O         | C7 H8 O         | [C7 H8 O, tqt=72.02, overall=72.02]         | (119.06486, 9467.136)(120.06793, 440.6142)(121.07314, 44.00 H8 O          | FindByFormula | 21 + | 8.66963   | 0.8260777  |
| C7 H8 O2        | C7 H8 O2        | [C7 H8 O2, tqt=94.66, overall=94.66]        | (125.049425, 609.575)(126.06045, 96.0651)                                 | C7 H8 O2      | 4 +  | 124.0578  | 2.1430538  |
| C7 H9 C1 N2 O3  | C7 H9 C1 N2 O3  | [C7 H9 C1 N2 O3, tqt=73.53, overall=73.53]  | (205.05555, 3374.641)(206.03638, 347.612)(207.0331, 861.00 H9 C1 N2 O3    | FindByFormula | 7 +  | 204.0629  | 1.0412881  |
| C7 H9 N O       | C7 H9 N O       | [C7 H9 N O, tqt=63.82, overall=63.82]       | (124.07571, 3722.2734)(125.07317, 936.6567)(126.07166, 14.00 H9 N O       | FindByFormula | 3 +  | 123.0765  | 1.1016673  |
| C7 H9 N O3 P2   | C7 H9 N O3 P2   | [C7 H9 N O3 P2, tqt=97.51, overall=97.51]   | (218.01305, 3461.7202)(219.01787, 424.15646)(220.01588, 1.00 H9 N O3 P2   | FindByFormula | 15 + | 217.0665  | 4.8053684  |
| C8 H10 N4 O2    | C8 H10 N4 O2    | [C8 H10 N4 O2, tqt=98.83, overall=98.83]    | (195.08832, 49364.164)(196.09038, 5056.4688)(197.0873, 99.08 H10 N4 O2    | FindByFormula | 23 + | 194.0807  | 5.883994   |
| C8 H10 N6 O6    | C8 H10 N6 O6    | [C8 H10 N6 O6, tqt=96.15, overall=96.15]    | (315.08847, 415305.97)(316.08334, 48487.676)(317.08328, 9.08 H10 N6 O6    | FindByFormula | 7 +  | 314.0792  | 0.80959964 |
| C8 H10 O6       | C8 H10 O6       | [C8 H10 O6, tqt=94.74, overall=94.74]       | (263.05418, 6864.61)(264.05796, 2833.0962)(265.0617, 150.00 H10 O6        | FindByFormula | 20 + | 262.0465  | 6.0392769  |
| C8 H11 N        | C8 H11 N        | [C8 H11 N, tqt=49.65, overall=49.65]        | (122.09654, 12318.351)(123.09829, 1275.7567)(124.10115, 5.00 H11 N        | FindByFormula | 15 + | 121.0981  | 0.7936361  |
| C8 H11 N O      | C8 H11 N O      | [C8 H11 N O, tqt=97.75, overall=97.75]      | (138.09135, 28342.55)(139.0943, 2766.4739)(140.10257, 684.08 H11 N O      | FindByFormula | 5 +  | 137.0842  | 2.6776164  |
| C8 H12 N6 O     | C8 H12 N6 O     | [C8 H12 N6 O, tqt=91.64, overall=91.64]     | (209.11417, 5438.955)(210.11526, 595.79425)(211.11246, 35.08 H12 N6 O     | FindByFormula | 17 + | 208.067   | 12.033246  |
| C8 H12 N6 O4    | C8 H12 N6 O4    | [C8 H12 N6 O4, tqt=75.35, overall=75.35]    | (257.10025, 6252.543)(258.10098, 805.0024)(259.1045, 411.00 H12 N         |               |      |           |            |



|                                                                                                                            |                      |                                                                                                                            |                      |   |                  |   |              |              |          |           |            |
|----------------------------------------------------------------------------------------------------------------------------|----------------------|----------------------------------------------------------------------------------------------------------------------------|----------------------|---|------------------|---|--------------|--------------|----------|-----------|------------|
| N-ACETYLNEURAMINATE (CAS# 131-48-6)                                                                                        | (M-N)                | N-ACETYLNEURAMINATE (CAS# 131-48-6)                                                                                        | (M-N)                | [ | lgt: 131-48-6    | ] | FIND/FORMULA | 2            | 309.108  | 0.7430016 |            |
| N-ACETYLNEURAMINATE (CAS# 131-48-6)                                                                                        | (M-N)                | N-ACETYLNEURAMINATE (CAS# 131-48-6)                                                                                        | (M-Na)               | [ | lgt: 131-48-6    | ] | FIND/FORMULA | 1            | 309.1037 | 0.8280009 |            |
| N-ACETYLSEROTONIN (CAS# 1210-83-9)                                                                                         | (M+H)                | N-ACETYLSEROTONIN (CAS# 1210-83-9)                                                                                         | (M-Na)               | [ | lgt: 1210-83-9   | ] | FIND/FORMULA | 1            | 218.1035 | 5.0831614 |            |
| NAD (CAS# 53-84-9)                                                                                                         | (M+2H) <sup>2+</sup> | NAD (CAS# 53-84-9)                                                                                                         | (M+2H) <sup>2+</sup> | [ | lgt: 53-84-9     | ] | FIND/FORMULA | 1            | 663.1116 | 1.0223553 |            |
| NAD (CAS# 53-84-9)                                                                                                         | (M+H)                | NAD (CAS# 53-84-9)                                                                                                         | (M+H)                | [ | lgt: 53-84-9     | ] | FIND/FORMULA | 1            | 663.1092 | 1.0091053 |            |
| N-ALPHA-ACETYL-LYSINE (CAS# 1946-82-3)                                                                                     | (M-N)                | N-ALPHA-ACETYL-LYSINE (CAS# 1946-82-3)                                                                                     | (M-N)                | [ | lgt: 1946-82-3   | ] | FIND/FORMULA | 9            | 188.1179 | 1.0000053 |            |
| NAPROXEN (CAS# 22204-53-1)                                                                                                 | (M+H)                | NAPROXEN (CAS# 22204-53-1)                                                                                                 | (M+H)                | [ | lgt: 22204-53-1  | ] | FIND/FORMULA | 6            | 230.0446 | 15.708742 |            |
| NAPROXEN (CAS# 22204-53-1)                                                                                                 | (M+Na)               | NAPROXEN (CAS# 22204-53-1)                                                                                                 | (M+Na)               | [ | lgt: 22204-53-1  | ] | FIND/FORMULA | 8            | 230.0251 | 15.709124 |            |
| N-BOC-D-GLUCOSAMINE (CAS# 75251-80-8)                                                                                      | (M-N)                | N-BOC-D-GLUCOSAMINE (CAS# 75251-80-8)                                                                                      | (M-Na)               | [ | lgt: 75251-80-8  | ] | FIND/FORMULA | 1            | 279.1294 | 4.724168  |            |
| N-CYCLOHEXYLFORMAMIDE (CAS# 766-93-8)                                                                                      | (M+H)                | N-CYCLOHEXYLFORMAMIDE (CAS# 766-93-8)                                                                                      | (M+H)                | [ | lgt: 766-93-8    | ] | C11519       | FIND/FORMULA | 6        | 127.0996  | 7.898964   |
| N-CYCLOHEXYLFORMAMIDE (CAS# 766-93-8)                                                                                      | (M+H)                | N-CYCLOHEXYLFORMAMIDE (CAS# 766-93-8)                                                                                      | (M+Na)               | [ | lgt: 766-93-8    | ] | C11519       | FIND/FORMULA | 17       | 127.0995  | 7.802338   |
| N-ETHYLMALAIMIDE (CAS# 128-53-0)                                                                                           | (M+H)                | N-ETHYLMALAIMIDE (CAS# 128-53-0)                                                                                           | (M+H)                | [ | lgt: 128-53-0    | ] | C00157       | FIND/FORMULA | 9        | 230.1046  | 1.0000053  |
| NICOTINAMIDE (CAS# 98-92-0)                                                                                                | (M+H)                | NICOTINAMIDE (CAS# 98-92-0)                                                                                                | (M+H)                | [ | lgt: 98-92-0     | ] | C00153       | FIND/FORMULA | 24       | 122.0482  | 1.131627   |
| NICOTINAMIDE HYPOXANTHINE DINUCLEOTIDENICOTINAMIDE HYPOXANTHINE DINUCLEOTIDENICOTINAMIDE MONOUNUCLEOTIDE (CAS# 22205-73-9) | (M+H)                | NICOTINAMIDE HYPOXANTHINE DINUCLEOTIDENICOTINAMIDE HYPOXANTHINE DINUCLEOTIDENICOTINAMIDE MONOUNUCLEOTIDE (CAS# 22205-73-9) | (M+H)                | [ | lgt: 22205-73-9  | ] | C00153       | FIND/FORMULA | 1        | 664.0907  | 0.9500005  |
| NICOTINAMIDE MONOUNUCLEOTIDE (CAS# 1094-61-7)                                                                              | (M+H)                | NICOTINAMIDE MONOUNUCLEOTIDE (CAS# 1094-61-7)                                                                              | (M+H)                | [ | lgt: 1094-61-7   | ] | FIND/FORMULA | 4            | 334.0759 | 1.0014968 |            |
| NICOTINATE (CAS# 59-67-6)                                                                                                  | (M+H)                | NICOTINATE (CAS# 59-67-6)                                                                                                  | (M+H)                | [ | lgt: 59-67-6     | ] | C00253       | FIND/FORMULA | 1        | 334.0584  | 0.6000015  |
| NICOTINE (CAS# 54-11-5)                                                                                                    | (M+H)                | NICOTINE (CAS# 54-11-5)                                                                                                    | (M+H)                | [ | lgt: 54-11-5     | ] | C00075       | FIND/FORMULA | 11       | 162.1149  | 1.285367   |
| N-METHYL-D-ASPARTIC ACID (CAS# 6384-92-5)                                                                                  | (M+H)                | N-METHYL-D-ASPARTIC ACID (CAS# 6384-92-5)                                                                                  | (M+H)                | [ | lgt: 6384-92-5   | ] | C12269       | FIND/FORMULA | 12       | 147.0522  | 0.78558725 |
| N-METHYL-D-GLUTAMATE (CAS# 6753-62-4)                                                                                      | (M+H)                | N-METHYL-D-GLUTAMATE (CAS# 6753-62-4)                                                                                      | (M+H)                | [ | lgt: 6753-62-4   | ] | C12269       | FIND/FORMULA | 13       | 147.0526  | 0.7703737  |
| N-METHYL-L-GLUTAMATE (CAS# 6753-62-4)                                                                                      | (M+H)                | N-METHYL-L-GLUTAMATE (CAS# 6753-62-4)                                                                                      | (M+H)                | [ | lgt: 6753-62-4   | ] | C10146       | FIND/FORMULA | 1        | 161.069   | 2.01774    |
| N-METHYL-L-GLUTAMATE (CAS# 6753-62-4)                                                                                      | (M+H)                | N-METHYL-L-GLUTAMATE (CAS# 6753-62-4)                                                                                      | (M+Na)               | [ | lgt: 6753-62-4   | ] | C10146       | FIND/FORMULA | 2        | 161.07    | 2.0030015  |
| N-METHYLNICOTINATE (CAS# 535-83-1)                                                                                         | (M+H)                | N-METHYLNICOTINATE (CAS# 535-83-1)                                                                                         | (M+H)                | [ | lgt: 535-83-1    | ] | C00104       | FIND/FORMULA | 6        | 137.0467  | 0.7003338  |
| N-OLEOYLGLYCINE (CAS# 2601-90-3)                                                                                           | (M+Na)               | N-OLEOYLGLYCINE (CAS# 2601-90-3)                                                                                           | (M+Na)               | [ | lgt: 2601-90-3   | ] | FIND/FORMULA | 2            | 339.2755 | 22.577133 |            |
| NORADRENALINE (CAS# 51-41-2)                                                                                               | (M+H)+[H2O]          | NORADRENALINE (CAS# 51-41-2)                                                                                               | (M+H)+[H2O]          | [ | lgt: 51-41-2     | ] | FIND/FORMULA | 2            | 169.0725 | 0.7653994 |            |
| NORLEUCINE (CAS# 327-57-1)                                                                                                 | (M+H)                | NORLEUCINE (CAS# 327-57-1)                                                                                                 | (M+H)                | [ | lgt: 327-57-1    | ] | C01933       | FIND/FORMULA | 28       | 113.0949  | 1.6318899  |
| NORMETANEPHRINE (CAS# 0)                                                                                                   | (M+H)                | NORMETANEPHRINE (CAS# 0)                                                                                                   | (M+H)                | [ | lgt: 0           | ] | FIND/FORMULA | 1            | 183.09   | 2.9570556 |            |
| NORMETANEPHRINE (CAS# 0)                                                                                                   | (M+H)                | NORMETANEPHRINE (CAS# 0)                                                                                                   | (M+H)                | [ | lgt: 0           | ] | FIND/FORMULA | 28           | 183.0898 | 2.5183146 |            |
| NORVALINE (CAS# 6600-40-4)                                                                                                 | (M+H)                | NORVALINE (CAS# 6600-40-4)                                                                                                 | (M+H)                | [ | lgt: 6600-40-4   | ] | C01826       | FIND/FORMULA | 13       | 117.079   | 0.9020053  |
| NORVALINE (CAS# 6600-40-4)                                                                                                 | (M+CO2H)             | NORVALINE (CAS# 6600-40-4)                                                                                                 | (M+CO2H)             | [ | lgt: 6600-40-4   | ] | C01826       | FIND/FORMULA | 12       | 117.0799  | 0.8904466  |
| O-ACETYLARGININE (CAS# 461-77-8)                                                                                           | (M+H)                | O-ACETYLARGININE (CAS# 461-77-8)                                                                                           | (M+H)                | [ | lgt: 461-77-8    | ] | C02571       | FIND/FORMULA | 18       | 203.1161  | 0.9375556  |
| OCTACOSANOIC ACID (CAS# 506-48-9)                                                                                          | (M+H)                | OCTACOSANOIC ACID (CAS# 506-48-9)                                                                                          | (M+H)                | [ | lgt: 506-48-9    | ] | FIND/FORMULA | 5            | 424.4273 | 23.519966 |            |
| OLEAMIDE (CAS# 301-02-0)                                                                                                   | (M+H)                | OLEAMIDE (CAS# 301-02-0)                                                                                                   | (M+H)                | [ | lgt: 301-02-0    | ] | FIND/FORMULA | 11           | 281.2702 | 32.673827 |            |
| OLEAMIDE (CAS# 301-02-0)                                                                                                   | (M+Na)               | OLEAMIDE (CAS# 301-02-0)                                                                                                   | (M+Na)               | [ | lgt: 301-02-0    | ] | FIND/FORMULA | 28           | 281.2716 | 32.67983  |            |
| OLEIC ACID (CAS# 112-80-1)                                                                                                 | (M+H)                | OLEIC ACID (CAS# 112-80-1)                                                                                                 | (M+H)                | [ | lgt: 112-80-1    | ] | FIND/FORMULA | 4            | 282.2556 | 22.575722 |            |
| OMEGA-HYDROXYDOECANOIC ACID (CAS# 505-95-3)                                                                                | (M+H)                | OMEGA-HYDROXYDOECANOIC ACID (CAS# 505-95-3)                                                                                | (M+H)                | [ | lgt: 505-95-3    | ] | FIND/FORMULA | 7            | 282.2565 | 22.516567 |            |
| OMEPRAZOLE (CAS# 73590-58-6)                                                                                               | (M+H)                | OMEPRazole (CAS# 73590-58-6)                                                                                               | (M+H)                | [ | lgt: 73590-58-6  | ] | C07324       | FIND/FORMULA | 5        | 345.1144  | 11.288663  |
| OMEPRAZOLE SULFONE (CAS# 88546-55-8)                                                                                       | (M+H)                | OMEPRazOLE SULFONE (CAS# 88546-55-8)                                                                                       | (M+H)                | [ | lgt: 88546-55-8  | ] | FIND/FORMULA | 6            | 361.1102 | 12.298963 |            |
| OPHOSPHO-D-SERINE (CAS# 17885-08-4)                                                                                        | (M+H)                | OPHOSPHO-D-SERINE (CAS# 17885-08-4)                                                                                        | (M+H)                | [ | lgt: 17885-08-4  | ] | FIND/FORMULA | 2            | 185.0091 | 0.8421029 |            |
| OPHOSPHO-L-SERINE (CAS# 17885-08-4)                                                                                        | (M+H)                | OPHOSPHO-L-SERINE (CAS# 17885-08-4)                                                                                        | (M+Na)               | [ | lgt: 17885-08-4  | ] | FIND/FORMULA | 3            | 185.0072 | 0.8833387 |            |
| O-ACETYLADENINE (CAS# 407-41-0)                                                                                            | (M+H)                | O-ACETYLADENINE (CAS# 407-41-0)                                                                                            | (M+H)                | [ | lgt: 407-41-0    | ] | FIND/FORMULA | 2            | 185.0704 | 0.7510048 |            |
| OPHTHALMIC ACID (CAS# 495-27-2)                                                                                            | (M+H)                | OPHTHALMIC ACID (CAS# 495-27-2)                                                                                            | (M+H)                | [ | lgt: 495-27-2    | ] | FIND/FORMULA | 28           | 128.1264 | 1.1964055 |            |
| O-SUCCINYL-L-HOMOSERINE (CAS# 1492-23-5)                                                                                   | (M+H)                | O-SUCCINYL-L-HOMOSERINE (CAS# 1492-23-5)                                                                                   | (M+H)                | [ | lgt: 1492-23-5   | ] | C01118       | FIND/FORMULA | 6        | 219.0737  | 0.740338   |
| OXIDIZED GLUTATHIONE (CAS# 27025-41-8)                                                                                     | (M+2H) <sup>2+</sup> | OXIDIZED GLUTATHIONE (CAS# 27025-41-8)                                                                                     | (M+2H) <sup>2+</sup> | [ | lgt: 27025-41-8  | ] | C01217       | FIND/FORMULA | 16       | 612.1569  | 1.3847575  |
| Oxidized glutathione (CAS# 27025-41-8)                                                                                     | (M+H)                | Oxidized glutathione (CAS# 27025-41-8)                                                                                     | (M+H)                | [ | lgt: 27025-41-8  | ] | C01217       | FIND/FORMULA | 16       | 612.1627  | 1.3718296  |
| P-ACETAMIDOPHENYL BETA-D-GLUCURONIDE (CAS# 12055-80-4)                                                                     | (M+H)                | P-ACETAMIDOPHENYL BETA-D-GLUCURONIDE (CAS# 12055-80-4)                                                                     | (M+H)                | [ | lgt: 12055-80-4  | ] | FIND/FORMULA | 11           | 327.0949 | 2.5250676 |            |
| P-ACETAMIDOPHENYL BETA-D-GLUCURONIDE (CAS# 12055-80-4)                                                                     | (M+H)                | P-ACETAMIDOPHENYL BETA-D-GLUCURONIDE (CAS# 12055-80-4)                                                                     | (M+H)                | [ | lgt: 12055-80-4  | ] | FIND/FORMULA | 11           | 327.0967 | 2.257109  |            |
| PALATINOSE (CAS# 343336-76-5)                                                                                              | (M+Na)               | PALATINOSE (CAS# 343336-76-5)                                                                                              | (M+Na)               | [ | lgt: 343336-76-5 | ] | FIND/FORMULA | 16           | 342.1191 | 0.716929  |            |
| PALMITOYL-CARNAITINE (CAS# 2364-67-2)                                                                                      | (M+H)                | PALMITOYL-CARNAITINE (CAS# 2364-67-2)                                                                                      | (M+H)                | [ | lgt: 2364-67-2   | ] | C02990       | FIND/FORMULA | 26       | 399.335   | 21.36389   |
| PALMITOYL-CARNAITINE (CAS# 2364-67-2)                                                                                      | (M+H)                | PALMITOYL-CARNAITINE (CAS# 2364-67-2)                                                                                      | (M+Na)               | [ | lgt: 2364-67-2   | ] | C02990       | FIND/FORMULA | 26       | 399.3366  | 21.36531   |
| PANTOTHENATE (CAS# 79-83-4)                                                                                                | (M+H)                | PANTOTHENATE (CAS# 79-83-4)                                                                                                | (M+H)                | [ | lgt: 79-83-4     | ] | C02349       | FIND/FORMULA | 20       | 219.1106  | 3.2639565  |
| PANTOTHENATE (CAS# 79-83-4)                                                                                                | (M+Na)               | PANTOTHENATE (CAS# 79-83-4)                                                                                                | (M+Na)               | [ | lgt: 79-83-4     | ] | C02349       | FIND/FORMULA | 25       | 219.1116  | 3.2634258  |
| PARAXANTHINE (CAS# 611-59-6)                                                                                               | (M+H)                | PARAXANTHINE (CAS# 611-59-6)                                                                                               | (M+H)                | [ | lgt: 611-59-6    | ] | C13747       | FIND/FORMULA | 19       | 180.066   | 4.2879405  |
| PARAXANTHINE (CAS# 611-59-6)                                                                                               | (M+H)                | PARAXANTHINE (CAS# 611-59-6)                                                                                               | (M+Na)               | [ | lgt: 611-59-6    | ] | C13747       | FIND/FORMULA | 19       | 180.0658  | 4.427045   |
| PHENYL ACETATE (CAS# 122-79-2)                                                                                             | (M+H)                | PHENYL ACETATE (CAS# 122-79-2)                                                                                             | (M+H)                | [ | lgt: 122-79-2    | ] | C00548       | FIND/FORMULA | 2        | 136.0531  | 3.9150338  |
| PHENYLACETIC ACID (CAS# 103-82-2)                                                                                          | (M+H)                | PHENYLACETIC ACID (CAS# 103-82-2)                                                                                          | (M+H)                | [ | lgt: 103-82-2    | ] | C07086       | FIND/FORMULA | 2        | 146.0521  | 1.7787575  |
| PHENYLALANINE (CAS# 63-91-2)                                                                                               | (M+H)                | PHENYLALANINE (CAS# 63-91-2)                                                                                               | (M+H)                | [ | lgt: 63-91-2     | ] | C00079       | FIND/FORMULA | 2        | 153.0677  | 2.5833142  |
| PHENYLALANINE (CAS# 63-91-2)                                                                                               | (M+Na)               | PHENYLALANINE (CAS# 63-91-2)                                                                                               | (M+Na)               | [ | lgt: 63-91-2     | ] | C00079       | FIND/FORMULA | 28       | 165.0793  | 2.519279   |
| PHENYLPHRINE (CAS# 59-42-7)                                                                                                | (M+H)                | PHENYLPHRINE (CAS# 59-42-7)                                                                                                | (M+H)                | [ | lgt: 59-42-7     | ] | C07441       | FIND/FORMULA | 4        | 167.0954  | 1.047554   |
| PHTHALATE (CAS# 88-99-3)                                                                                                   | (M+H)                | PHTHALATE (CAS# 88-99-3)                                                                                                   | (M+H)                | [ | lgt: 88-99-3     | ] | C01606       | FIND/FORMULA | 3        | 166.0822  | 4.846525   |
| PICOLINIC ACID (CAS# 98-98-6)                                                                                              | (M+H)                | PICOLINIC ACID (CAS# 98-98-6)                                                                                              | (M+H)                | [ | lgt: 98-98-6     | ] | FIND/FORMULA | 5            | 123.0331 | 1.0490007 |            |
| PNITOL (CAS# 10284-63-6)                                                                                                   | (M+H)                | PNITOL (CAS# 10284-63-6)                                                                                                   | (M+H)                | [ | lgt: 10284-63-6  | ] | C03844       | FIND/FORMULA | 1        | 194.0787  | 0.8093998  |
| PIRELOCATE (CAS# 535-75-1)                                                                                                 | (M+H)                | PIRELOCATE (CAS# 535-75-1)                                                                                                 | (M+H)                | [ | lgt: 535-75-1    | ] | C04008       | FIND/FORMULA | 1        | 129.08    | 1.000408   |
| PIRELOCATE (CAS# 535-75-1)                                                                                                 | (M+Na)               | PIRELOCATE (CAS# 535-75-1)                                                                                                 | (M+Na)               | [ | lgt: 535-75-1    | ] | C04008       | FIND/FORMULA | 1        | 129.08    | 0.7929373  |
| PROCOLLAGEN 5-HYDROXY-L-LYSINE (CAS# 1190-94-9)                                                                            | (M+H)                | PROCOLLAGEN 5-HYDROXY-L-LYSINE (CAS# 1190-94-9)                                                                            | (M+H)                | [ | lgt: 1190-94-9   | ] | C01211       | FIND/FORMULA | 2        | 162.102   | 0.7499975  |
| PROCOLLAGEN 5-HYDROXY-L-LYSINE (CAS# 1190-94-9)                                                                            | (M+H)                | PROCOLLAGEN 5-HYDROXY-L-LYSINE (CAS# 1190-94-9)                                                                            | (M+H)                | [ | lgt: 1190-94-9   | ] | C01211       | FIND/FORMULA | 1        | 162.1005  | 0.8059941  |
| PROGESTERONE (CAS# 57-83-0)                                                                                                | (M+H)                | PROGESTERONE (CAS# 57-83-0)                                                                                                | (M+H)                | [ | lgt: 57-83-0     | ] | FIND/FORMULA | 4            | 314.2128 | 19.7976   |            |
| PROLINE (CAS# 147-85-3)                                                                                                    | (M+H)                | PROLINE (CAS# 147-85-3)                                                                                                    | (M+H)                | [ | lgt: 147-85-3    | ] | C01906       | FIND/FORMULA | 27       | 115.0629  | 0.617386   |
| PROLINE (CAS# 147-85-3)                                                                                                    | (M+Na)               | PROLINE (CAS# 147-85-3)                                                                                                    | (M+Na)               | [ | lgt: 147-85-3    | ] | C01906       | FIND/FORMULA | 1        | 115.064   | 0.617491   |
| PROMETRYN (CAS# 7287-19-6)                                                                                                 | (M+H)                | PROMETRYN (CAS# 7287-19-6)                                                                                                 | (M+H)                | [ | lgt: 7287-19-6   | ] | FIND/FORMULA | 9            | 241.1367 | 15.559841 |            |
| PROSTAGLANDIN E2 (CAS# 363-24-6)                                                                                           | (M+H)                | PROSTAGLANDIN E2 (CAS# 363-24-6)                                                                                           | (M+H)                | [ | lgt: 363-24-6    | ] | FIND/FORMULA | 12           | 352.2216 | 16.911491 |            |
| PROSTAGLANDIN E2 (CAS# 363-24-6)                                                                                           | (M+H)+[H2O]          | PROSTAGLANDIN E2 (CAS# 363-24-6)                                                                                           | (M+H)+[H2O]          | [ | lgt: 363-24-6    | ] | FIND/FORMULA | 2            | 352.2216 | 16.828516 |            |
| PROSTAGLANDIN E2 (CAS# 363-24-6)                                                                                           | (M+Na)               | PROSTAGLANDIN E2 (CAS# 363-24-6)                                                                                           | (M+Na)               | [ | lgt: 363-24-6    | ] | FIND/FORMULA | 2            | 352.2236 | 16.749004 |            |
| PROTODIOPHYRIN (CAS# 553-12-8)                                                                                             | (M+H)                | PROTODIOPHYRIN (CAS# 553-12-8)                                                                                             | (M+H)                | [ | lgt: 553-12-8    | ] | C02191       | FIND/FORMULA | 6        | 562.2576  | 20.91775   |
| PTERIN (CAS# 233-60-4)                                                                                                     | (M+H)                | PTERIN (CAS# 233-60-4)                                                                                                     | (M+H)                | [ | lgt: 233-60-4    | ] | C00465       | FIND/FORMULA | 6        | 120.044   | 1.3700921  |
| PURINE (CAS# 120-73-0)                                                                                                     | (M+H)                | PURINE (CAS# 120-73-0)                                                                                                     | (M+H)                | [ | lgt: 120-73-0    | ] | C00465       | FIND/FORMULA | 8        | 120.044   | 1.3700921  |
| PURINE (CAS# 120-73-0)                                                                                                     | (M+Na)               | PURINE (CAS# 120-73-0)                                                                                                     | (M+Na)               | [ | lgt: 120-73-0    | ] | C00465       | FIND/FORMULA | 3        | 120.0436  | 1.013396   |
| PYRIDINE-2,3-DICARBOXYLATE (CAS# 89-00-9)                                                                                  | (M+H)+[H2O]          | PYRIDINE-2,3-DICARBOXYLATE (CAS# 89-00-9)                                                                                  | (M+H)+[H2O]          | [ | lgt: 89-00-9     | ] | FIND/FORMULA | 1            | 167.0213 | 0.7750005 |            |
| PYRIDINE-2,3-DICARBOXYLATE (CAS# 89-00-9)                                                                                  | (M+H)                | PYRIDINE-2,3-DICARBOXYLATE (CAS# 89-00-9)                                                                                  | (M+H)                | [ | lgt: 89-00-9     | ] | FIND/FORMULA | 3            | 167.0233 | 0.92067   |            |
| PYRIDOXAL (CAS# 66-72-8)                                                                                                   | (M+H)                | PYRIDOXAL (CAS# 66-72-8)                                                                                                   | (M+H)                | [ | lgt: 66-72-8     | ] | C00250       | FIND/FORMULA | 12       | 177.0757  | 1.7787575  |
| PYRIDOXAL (CAS# 66-72-8)                                                                                                   | (M+H)+[H2O]          | PYRIDOXAL (CAS# 66-72-8)                                                                                                   | (M+H)+[H2O]          | [ | lgt: 66-72-8     | ] | C00250       | FIND/FORMULA | 1        | 176.066   | 1.8421029  |
| PYRIDOXAL PHOSPHATE (CAS# 853645-22-4)                                                                                     | (M+H)                | PYRIDOXAL PHOSPHATE (CAS# 853645-22-4)                                                                                     | (M+H)                | [ | lgt: 853645-22-4 | ] | FIND/FORMULA | 4            | 247.0257 | 1.0135002 |            |
| PYRIDOXINE (CAS# 65-23-6)                                                                                                  | (M+H)                | PYRIDOXINE (CAS# 65-23-6)                                                                                                  | (M+H)                | [ | lgt: 65-23-6     | ] | C00314       | FIND/FORMULA | 1        | 149.1074  | 1.1000023  |
| QUINOLIN-2-OL (CAS# 59-31-4)                                                                                               | (M+H)                | QUINOLIN-2-OL (CAS# 59-31-4)                                                                                               | (M+H)                | [ | lgt: 59-31-4     | ] | C06338       | FIND/FORMULA | 20       | 145.0528  | 7.6538368  |
| QUINOLIN-2-OL (CAS# 59-31-4)                                                                                               | (M+Na)               | QUINOLIN-2-OL (CAS# 59-31-4)                                                                                               | (M+Na)               | [ | lgt: 59-31-4     | ] | C06338       | FIND/FORMULA | 25       | 145.0529  | 6.734479   |
| RAC-GLYCEROL 1-MYRISTATE (CAS# 75685-84-6)                                                                                 | (M+H)                | RAC-GLYCEROL 1-MYRISTATE (CAS# 75685-84-6)                                                                                 | (M+H)                | [ | lgt: 75685-84-6  | ] | FIND/FORMULA | 26           | 302.244  | 22.18171  |            |
| RAC-GLYCER                                                                                                                 |                      |                                                                                                                            |                      |   |                  |   |              |              |          |           |            |

Compound

| Compound                                          | Pos_Human Plasma Extraction_1 | Pos_Human Plasma Extraction_2 | Pos_Human Plasma Extraction_3 | Pos_Human Plasma Extraction_4 | Pos_Human Plasma Extraction_5 | Pos_Human Plasma Extraction_6 | Pos_Pool QC 1 | Pos_Pool QC 2 | Pos_Pool QC 3 | Pos_Pool QC 4 | Pos_S00015447_1 | Pos_S00015448_2 | Pos_S00015449_3 | Pos_S00015450_4 | Pos_S00015451_5 | Pos_S00015452_6 | Pos_S00015453_7 | Pos_S00015454_8 | Pos_S00015455_9 | Pos_S00015456_10 | Pos_S00015457_11 | Pos_S00015458_12 | Pos_S00015459_13 | Pos_S00015460_14 | Pos_S00015461_15 | Pos_S00015462_16 | Pos_S00015463_17 | Pos_S00015464_18 |       |
|---------------------------------------------------|-------------------------------|-------------------------------|-------------------------------|-------------------------------|-------------------------------|-------------------------------|---------------|---------------|---------------|---------------|-----------------|-----------------|-----------------|-----------------|-----------------|-----------------|-----------------|-----------------|-----------------|------------------|------------------|------------------|------------------|------------------|------------------|------------------|------------------|------------------|-------|
| C17 H10 N10 O3                                    |                               |                               |                               |                               |                               |                               | 245770        | 258748        | 260330        | 256998        |                 | 124077          |                 | 28606           | 9245            | 118389          | 201564          |                 |                 | 203100           |                  | 100467           | 365691           | 522670           | 3045             | 431769           | 182133           | 7077             |       |
| C22 H49 N5 O3 P2 S2                               | 398265                        | 400238                        | 382854                        | 319652                        | 263192                        | 227928                        | 63114         | 21690         | 13697         | 58274         | 31836           | 23850           | 10482           | 23674           | 27036           | 8668            | 19033           | 17900           | 28546           | 65194            | 95071            | 5287             | 18884            | 19129            | 7509             | 19763            | 29627            | 8017             |       |
| PROLINE (CAS# 147-85-3); (M+H)+                   | 905004                        | 1051452                       | 971546                        | 550515                        | 515840                        | 979468                        | 6259          | 7117          | 6945          | 6615          | 733664          | 6746            | 252448          | 584831          | 868148          | 12591           | 5068            | 13416           |                 | 2200             | 940795           | 33368            | 3700             | 15812            | 14395            | 14604            | 8844             | 5159             |       |
| C15 H36 N8 O7                                     |                               |                               | 9983                          |                               |                               |                               | 52642         | 51828         |               |               | 49925           |                 |                 | 80806           | 37936           |                 |                 |                 |                 | 5952             | 90212            |                  | 56183            | 97651            | 30367            | 45032            | 35626            | 49362            |       |
| C25 H29 N3                                        |                               |                               |                               | 3839                          | 12709                         |                               | 133380        | 175157        | 163171        | 164643        | 531227          | 2437192         | 70979           | 380226          | 128631          | 4434            | 52026           | 50864           | 149411          | 54117            | 15861            |                  | 39870            | 42979            | 35939            | 338674           |                  | 14192            |       |
| C38 H54 O11 S                                     |                               |                               |                               |                               |                               |                               | 89855         | 68688         | 65409         | 65689         |                 |                 |                 |                 | 5345            |                 |                 |                 | 30777           |                  | 1579             |                  | 18484            |                  |                  |                  |                  |                  |       |
| C26 H26 N10 S                                     | 11095                         | 9392                          | 13377                         |                               | 8747                          | 12549                         | 55464         | 70228         | 65197         | 64580         | 41635           | 110384          | 76831           | 125663          | 97072           | 47051           | 82890           | 19883           | 79664           | 10462            | 73811            | 22248            | 166975           | 33712            | 128162           | 54112            | 102775           | 32452            |       |
| GIBBERELLIC ACID [(SITD)] (CAS# 77-06-5); (M+Na)+ | 90950                         | 97084                         | 96328                         | 101406                        |                               |                               | 203812        | 206980        | 202473        | 199993        | 163496          | 180231          | 127193          | 201369          | 181933          | 156634          | 153290          | 186308          | 238951          | 154032           | 188935           | 204709           | 234061           | 207982           | 278997           | 279887           | 229280           | 219841           |       |
| C17 H18 N10 O3                                    |                               |                               |                               |                               |                               |                               | 87404         | 83506         | 79794         |               |                 |                 |                 |                 |                 |                 |                 |                 | 51684           |                  |                  |                  | 30188            |                  |                  |                  |                  |                  |       |
| C22 H36 N6 O11                                    | 6955                          | 7321                          | 6712                          | 6886                          | 5672                          | 5355                          | 306322        | 283054        | 294016        | 290435        | 5153            | 3780            | 4044            | 4841            | 22961           | 5050            | 3461            | 6517            | 116074          |                  | 4791             | 4651             | 90761            | 4455             | 3035             | 3426             | 7445             | 6065             |       |
| C7 H8 O                                           |                               |                               |                               |                               |                               |                               | 70926         | 70108         | 72111         | 72202         | 55288           | 2694            | 10558           | 18538           | 14185           | 13087           | 143016          | 150768          | 191318          | 107072           | 153521           | 52997            | 46928            | 90436            |                  | 121347           |                  | 153668           |       |
| C4 H14 N2 P2 S                                    | 88750                         | 82114                         | 68877                         | 77630                         | 65692                         | 64992                         | 220436        | 223936        | 218495        | 222263        | 168568          | 205792          | 137907          | 217679          | 188572          | 167499          | 162582          | 194096          | 250974          | 166577           | 207116           | 219328           | 116165           | 227151           | 297606           | 307524           | 254356           | 234351           |       |
| C25 H33 N11                                       | 79267                         | 80784                         | 72957                         | 79431                         | 81359                         | 83593                         | 31105         | 34209         |               |               | 1048            | 44085           | 47901           |                 |                 |                 |                 | 49410           |                 | 30313            |                  |                  |                  |                  |                  | 34272            | 44942            | 36019            |       |
| C22 H41 N3 O6                                     |                               |                               |                               | 20119                         | 7012                          |                               | 42785         | 49058         | 51657         | 44048         | 152319          |                 | 244143          | 4195            | 26104           | 10031           |                 | 11278           | 13467           | 8627             | 10383            | 2829             |                  |                  | 8960             | 17908            |                  | 90194            |       |
| C13 H30 N8 O S2                                   |                               |                               |                               |                               |                               |                               | 21866         | 24000         | 21081         | 42248         |                 |                 |                 |                 |                 |                 |                 |                 |                 |                  |                  |                  |                  |                  |                  |                  |                  |                  |       |
| C26 H48 N3 O11 P                                  | 2724672                       | 2594430                       | 2723362                       | 2740019                       | 2522585                       | 2497345                       | 556284        | 589170        | 568196        | 543267        | 538677          | 516390          | 144197          | 425114          | 129039          | 221022          | 417255          | 747579          | 598049          | 1040835          | 832644           | 205765           | 616221           | 447701           | 19282            | 539170           | 427532           | 636420           |       |
| C44 H41 N O3 S2                                   | 60928                         | 59727                         | 55684                         | 56758                         | 55259                         | 49066                         | 28160         | 25636         | 24047         | 27458         | 13810           | 4719            | 3464            | 12475           | 7537            | 1659            | 19608           | 11978           | 27300           | 7554             | 18989            | 6887             | 27465            | 19998            | 10571            | 3815             | 19420            | 19420            |       |
| THEOPHYLLINE (CAS# 58-55-9); (M+H)+               | 102616                        | 109530                        | 97570                         | 99173                         | 103109                        | 95513                         | 67373         | 66629         | 65618         | 64294         | 97493           |                 |                 |                 | 24506           |                 |                 | 60709           | 293117          |                  | 65035            | 216059           | 336229           | 125309           |                  |                  |                  | 272669           |       |
| C23 H25 N3                                        |                               |                               |                               |                               |                               |                               | 178453        | 249165        | 229172        | 229304        | 956458          | 4224080         | 100814          | 193809          | 42143           | 24108           | 73405           | 86054           | 79653           | 45854            | 14657            |                  | 31378            |                  |                  | 222279           | 6140             |                  |       |
| C29 H50 N5 O2 P S3                                | 117989                        | 114748                        | 116261                        | 108749                        | 102662                        | 91471                         | 7473          | 9075          | 6811          | 10399         | 5699            |                 |                 | 5975            | 11112           |                 | 16866           |                 |                 | 15218            | 10662            | 16026            |                  |                  | 16183            |                  |                  | 21498            |       |
| C22 H44 N2 P2                                     | 52903                         | 25698                         | 32346                         | 38739                         | 58617                         | 57229                         | 282206        | 282310        | 287397        | 266232        | 307729          | 238494          | 231202          | 114010          | 67115           | 160074          | 323009          | 279257          | 182354          | 241039           | 369669           | 128952           | 1211862          | 357636           | 153154           | 483601           | 276408           | 322809           |       |
| C18 H33 O P3                                      | 33766                         | 33278                         | 30079                         | 31975                         | 30405                         | 29135                         | 36679         | 36126         | 36002         | 36098         | 34355           | 36722           | 32853           | 35640           | 34265           | 33768           | 32713           | 34650           | 34092           | 30828            | 39122            | 38064            | 37343            | 36041            | 42928            | 39729            | 41180            | 32670            |       |
| C4 H9 N S                                         | 97375                         | 107345                        | 94187                         | 97387                         | 101639                        | 94324                         | 160941        | 2234          | 3864          |               |                 |                 |                 |                 | 96281           | 80183           | 163470          | 57073           |                 |                  | 30631            |                  |                  |                  |                  |                  |                  |                  |       |
| GUANOSINE (CAS# 118-00-3); (M+H)+                 |                               |                               |                               |                               |                               |                               | 825938        | 768938        | 690588        | 769363        | 344389          | 414545          | 160825          | 643101          | 729035          | 430089          | 1439941         | 1171804         | 1376791         | 760932           | 1047965          | 582558           | 1169406          | 908893           | 191027           | 11850            | 1205541          | 979707           |       |
| C16 H33 N O                                       |                               |                               |                               | 3067                          | 3225                          | 2300                          | 323636        | 148940        | 131030        | 122402        | 12618           | 10755           | 20948           |                 | 77909           | 101006          | 8118            | 13911           | 16583           | 117648           | 14765            | 14914            | 10320            | 134529           | 108830           | 18336            | 14450            | 12010            | 17884 |
| C16 H24 O4 S                                      | 391335                        | 400434                        | 395552                        | 423673                        | 418522                        | 420003                        | 2738007       | 3084858       | 3068698       | 3066217       | 6910769         | 1688807         | 1.06E+07        | 1072774         | 2795654         | 1201011         | 1051724         | 706866          | 1505939         | 879431           | 713497           | 521328           | 2400886          | 592675           | 707308           | 1730986          | 1691272          | 908374           |       |
| C11 H64 N2 O2 P2 S                                |                               |                               |                               |                               |                               |                               | 52716         | 54755         | 56275         | 53872         |                 |                 |                 |                 |                 |                 |                 |                 |                 |                  |                  |                  |                  |                  |                  |                  |                  |                  |       |
| C17 H22 C1 N3 O3 P2 S2                            |                               | 1064                          |                               |                               |                               |                               | 42636         | 43494         | 44393         | 45379         |                 |                 | 21114           |                 | 12854           | 3055            | 32675           | 47395           | 27553           | 56329            | 42067            | 11773            | 42039            | 57457            | 65284            | 12495            | 51282            | 48798            |       |
| C15 H35 N7 O                                      |                               |                               |                               |                               |                               |                               | 44539         | 46706         | 44326         | 42187         | 10518           | 21846           |                 |                 | 9760            |                 | 30807           | 128705          | 124106          | 164705           | 129098           | 94554            | 39469            | 78285            | 64547            | 8746             | 69149            | 154220           |       |
| C28 H43 N O8 S2                                   |                               |                               |                               |                               |                               |                               | 48604         | 54312         | 53403         | 53237         | 7077            | 24156           | 41690           | 39070           | 8012            | 19345           | 146543          | 69304           | 153161          | 44406            | 40891            | 34887            | 79750            | 47967            | 35663            | 53017            | 77329            | 46050            |       |
| C28 H41 N7 O2                                     | 54280                         | 52801                         | 53352                         | 48086                         | 42806                         | 40387                         | 40425         | 48674         | 41237         | 42688         | 97881           | 136971          | 15294           | 155855          | 124911          | 73834           | 8628            | 51082           |                 | 12158            | 83168            | 5025             | 27297            | 15805            |                  | 32710            | 36180            |                  |       |
| C28 H57 N4 O3 P S                                 |                               |                               |                               |                               |                               |                               | 280906        | 293237        | 306984        | 286903        | 278040          | 356149          | 179621          | 202822          | 93826           | 87102           | 813635          | 325909          | 449898          | 241314           | 562753           | 87887            | 499887           | 322862           | 65074            | 303300           | 248726           | 635600           |       |
| C12 H21 N4 O3 P                                   | 2613504                       | 2637661                       | 2594945                       | 2585672                       | 2451136                       | 2440242                       | 2963822       | 3192105       | 3086646       | 3051277       | 2844347         | 3040239         | 3445175         | 3156539         | 3132885         | 3025125         | 3621523         | 3115056         | 6880396         | 2971494          | 3372513          | 1112325          | 3740818          | 3337040          | 3354390          | 4014435          | 5283088          | 4782509          |       |
| C7 H17 N5 S                                       |                               |                               |                               |                               |                               |                               | 1250216       | 1274691       | 1209308       | 1254691       |                 |                 | 3969            |                 |                 |                 |                 |                 |                 |                  |                  |                  |                  |                  |                  |                  |                  |                  |       |
| C15 H22 S2                                        | 10354                         | 9935                          | 5184                          | 6114                          | 6867                          | 2033                          | 61366         | 60706         | 55134         | 59607         | 42121           | 45079           | 47496           | 47822           | 45567           | 46472           | 56451           | 56845           | 65209           | 57300            | 55096            |                  |                  | 56434            | 51580            | 56247            | 61699            | 64196            |       |
| C19 H29 N3 O P2                                   | 68449                         | 71291                         | 60980                         | 60990                         | 58074                         | 52426                         | 1532          |               | 5326          | 8778          | 35980           |                 |                 | 4373            | 24878           |                 | 2435            | 7605            |                 | 11737            | 3721             | 32066            | 2524             | 10965            | 5232             |                  |                  | 14182            |       |
| C41 H45 N3 O3 S                                   | 51108                         | 31860                         | 48157                         | 54951                         | 29717                         | 51588                         | 3231          |               | 28247         | 27872         | 19037           |                 |                 |                 |                 |                 |                 |                 |                 |                  |                  |                  |                  |                  |                  |                  |                  |                  |       |
| C30 H64 N O2 P5 S3                                | 176527                        | 118020                        | 175588                        | 167713                        | 223964                        | 62862                         | 26180         | 27522         | 148406        | 147020        | 104608          | 257919          |                 |                 | 9735            | 16739           | 16759           | 25182           | 17132           | 40095            | 36834            | 16059            | 26130            | 19696            |                  | 13695            | 11506            | 30410            |       |
| C18 H31 N7                                        | 2960                          |                               |                               |                               |                               |                               | 130890        | 145106        | 148406        | 147020        | 104608          | 257919          |                 |                 | 108008          | 62851           |                 |                 |                 |                  |                  |                  |                  |                  |                  |                  |                  |                  |       |
| C24 H33 N3 O2                                     |                               |                               |                               |                               |                               |                               | 303397        | 337152        | 334733        | 345795        | 178006          | 7783            | 34969           | 63942           | 73198           | 78338           | 870727          | 793336          | 1482554         | 1033441          | 1394988          | 291533           | 372614           | 209358           | 16606            | 617396           | 23301            | 1046912          |       |
| C18 H22 N4 O                                      |                               |                               |                               |                               |                               |                               | 514937        | 536625        | 526993        | 519653        | 494735          | 522333          | 529838          | 522464          | 484095          | 518071          | 531583          | 503517          | 508053          | 506420           | 521960           | 535740           | 507520           | 540424           | 485576           | 590085           | 569727           | 542352           |       |
| C29 H64 N12 O3 S2                                 | 7719                          | 13845                         | 24719                         | 16738                         | 13734                         | 157482                        | 158350        | 135639        | 166621        | 107956        | 151964          | 97929           | 101116          | 91832           | 41068           | 332480          | 159458          | 213740          | 130629          | 137011           | 44152            | 489103           | 136289           | 33075            | 190369           | 122083           | 316854           |                  |       |
| C12 H17 N5                                        | 200778                        | 206899                        | 183104                        | 176074                        | 155122                        | 146052                        | 266907        | 271577        | 265198        | 262011        | 623714          | 517649          | 123970          | 501027          | 430227          | 137134          | 123970          | 110074          | 736654          | 248359           | 303241           | 50486            | 350022           | 85776            |                  | 162416           | 39070            | 211655           |       |
| C25 H48 N2 O3 S                                   | 12090                         | 17803                         | 22145                         | 33953                         | 22467                         | 215515                        | 33730         |               | 66122         | 61033         |                 |                 | 4134            | 382472          | 2775            | 54928           | 28773           | 44755           | 45272           | 25424            | 34555            | 31023            | 26418            | 35967            | 48799            | 73899            | 29255            | 28350            |       |
| C7 H14 N6 O2</                                    |                               |                               |                               |                               |                               |                               |               |               |               |               |                 |                 |                 |                 |                 |                 |                 |                 |                 |                  |                  |                  |                  |                  |                  |                  |                  |                  |       |





|                                                                            |         |         |         |         |         |         |         |         |         |         |         |         |         |         |         |         |         |         |         |         |          |         |          |         |        |         |         |         |        |       |        |
|----------------------------------------------------------------------------|---------|---------|---------|---------|---------|---------|---------|---------|---------|---------|---------|---------|---------|---------|---------|---------|---------|---------|---------|---------|----------|---------|----------|---------|--------|---------|---------|---------|--------|-------|--------|
| C20 H32 O3                                                                 | 22259   | 249830  | 254213  | 269200  | 257049  | 71886   | 288324  | 376162  | 295968  | 487655  | 401405  | 688712  | 235902  | 173413  | 341988  | 243171  | 232300  | 1061977 | 432842  | 453682  | 1126593  | 220973  | 912341   | 397141  | 587915 | 434990  | 573028  | 1057911 |        |       |        |
| C31 H60 N8 O5 S2                                                           |         |         |         |         |         |         |         |         |         |         |         |         |         |         |         |         |         |         |         |         |          |         |          |         |        |         |         |         |        |       |        |
| C46 H78 N O2 P 5                                                           | 17173   | 14315   | 17779   | 6324    |         |         |         |         |         |         |         |         |         |         |         |         |         |         |         |         |          |         |          |         |        |         |         |         |        |       |        |
| C6 H13 Cl N6                                                               | 9597526 | 9538664 | 9180479 | 955067  | 9247353 | 9040986 | 3630419 | 3663625 | 3546237 | 3569400 | 2405034 | 2020843 | 753883  | 1937177 | 2635346 | 3513920 | 3342043 | 7753906 | 8964846 | 4500354 | 4866243  | 3236516 | 3937325  | 4518989 |        | 6430240 | 2663920 | 8074084 |        |       |        |
| C13 H16 N6 O4                                                              | 37530   | 40012   | 29026   | 44904   | 43366   | 33229   | 474395  | 512962  | 511776  | 505791  | 396711  | 467823  | 443706  | 560106  | 660738  | 375533  | 416282  | 556141  | 546635  | 520238  | 480658   | 489697  | 541953   | 420222  | 489656 | 495235  | 653960  | 518741  |        |       |        |
| C27 H39 N5 O12                                                             | 134614  | 128635  | 135357  | 120204  | 105405  | 98900   | 160443  | 138796  | 143811  | 155482  | 11000   |         |         |         | 61217   |         |         |         | 27189   |         |          |         |          |         |        |         |         |         |        |       |        |
| C35 H45 N3 O2 P2                                                           |         |         |         |         |         |         |         |         |         |         |         |         |         |         |         |         |         |         |         |         |          |         |          |         |        |         |         |         |        |       |        |
| C17 H32 N6 O2                                                              | 507346  | 506228  | 489445  |         | 504212  | 432299  | 1670709 | 1612741 | 1560355 | 1115500 | 657124  | 655714  | 928318  | 111598  | 9393612 | 689745  | 620629  | 681113  | 563952  | 2636565 | 755500   | 46958   | 624001   | 603588  | 671851 | 682050  | 685878  | 948202  |        |       |        |
| C10 H26 N4                                                                 |         |         |         | 1040    |         |         |         |         |         |         |         |         |         |         |         |         |         |         |         |         |          |         |          |         |        |         |         |         |        |       |        |
| C24 H50 O13                                                                | 134157  | 137720  | 137108  | 130860  | 131053  | 129263  | 191609  | 195654  | 189047  | 187224  | 31817   | 76750   | 36733   | 44153   | 244251  | 45126   | 279440  | 335706  | 364526  | 241381  | 279301   | 60555   | 474739   | 257356  | 36165  | 333665  | 133520  | 333297  |        |       |        |
| C31 H27 N4 O P 53                                                          |         |         |         |         |         |         |         |         |         |         |         |         |         |         |         |         |         |         |         |         |          |         |          |         |        |         |         |         |        |       |        |
| C10 H22 O6                                                                 | 170894  | 177407  | 179643  | 174208  | 174237  | 160366  | 484695  | 489731  | 482899  | 469426  | 114841  | 257525  | 152806  | 147114  | 687497  | 169159  | 552538  | 1028034 | 518244  | 423387  | 477674   | 250737  | 981228   | 432032  | 208968 | 743756  | 482561  | 1145805 |        |       |        |
| C15 H13 N O2                                                               | 106653  | 106785  | 104835  | 105950  | 99221   | 97591   | 24300   | 25129   | 23880   | 24901   | 10294   | 20808   |         |         | 15595   |         |         |         |         |         |          |         |          |         |        |         |         |         |        |       |        |
| C26 H52 N2 O2 P 2 5                                                        | 106937  | 110761  | 107603  | 109730  | 106137  | 104578  | 102943  | 100458  | 102742  | 106388  | 117610  | 99929   | 89680   | 118388  | 98702   | 99179   | 102419  | 95253   | 122945  | 91831   | 88173    | 138460  | 113520   | 124820  | 197817 | 159616  | 123774  | 102098  |        |       |        |
| C48 H59 N3 S2                                                              | 20239   | 23611   | 23892   | 5432    | 29638   | 34385   | 23212   | 28660   | 16115   | 20271   | 12690   | 21918   | 6408    | 14091   | 7865    | 42361   | 36477   | 12000   | 50784   | 35523   | 79822    | 8609    | 73996    | 42163   | 5275   | 10913   | 21714   |         |        |       |        |
| C15 H27 N O4                                                               | 493341  | 490071  | 461084  | 409678  | 370023  | 328635  | 37980   | 40745   | 36941   | 38261   | 14167   | 8288    |         |         | 2524    | 3100    | 33066   | 30967   | 61079   | 169607  | 136272   | 2504    | 72321    | 39262   |        | 58914   | 30156   | 65159   |        |       |        |
| QUINOLIN-2-OL (CAS# 59-31-4); (M+H) <sup>+</sup>                           | 1782    |         |         |         |         |         |         |         |         |         |         |         |         |         |         |         |         |         |         |         |          |         |          |         |        |         |         |         |        |       |        |
| C21 H41 N2 O3 P 5                                                          | 19639   | 19580   | 22013   | 22251   |         |         |         |         |         |         |         |         |         |         |         |         |         |         |         |         |          |         |          |         |        |         |         |         |        |       |        |
| C5 H13 N O                                                                 | 224350  | 176552  | 229304  | 203144  | 175921  | 159124  | 3443    | 2848    | 3095    | 2314    | 2023    | 4590    |         |         | 2500    |         |         |         |         |         |          |         |          |         |        |         |         |         |        |       |        |
| C19 H38 N2 O3                                                              | 50077   | 50368   | 57455   | 47285   | 49372   | 44179   | 410535  | 445685  | 429696  | 432776  | 157482  | 2471078 | 83371   | 99905   | 452753  | 394532  | 190451  | 985468  | 395592  | 276151  | 489748   | 128083  | 692743   | 223998  | 74294  | 260291  | 161485  | 2341968 |        |       |        |
| C8 H9 N O                                                                  | 1486552 | 1360839 | 1395961 | 1414518 | 1361847 | 1340170 | 1214008 | 1239732 | 1181555 | 1190443 | 797922  | 712734  | 85903   | 408055  | 868963  | 1177336 | 1213128 | 15470   |         |         |          |         |          |         |        |         |         |         |        |       |        |
| C20 H28 O2 P 2                                                             | 45490   | 45520   | 43259   | 45746   | 44605   | 46502   | 33377   | 34962   | 36481   | 31756   | 9077    | 22018   | 12250   | 17102   | 22018   | 25402   |         |         |         | 43015   | 30861    | 26880   | 8288     | 36799   | 53453  | 13206   | 33033   | 25534   | 41124  |       |        |
| C14 H12 O4                                                                 |         |         |         | 4843    |         |         |         |         |         |         |         |         |         |         |         |         |         |         |         |         |          |         |          |         |        |         |         |         |        |       |        |
| C24 H4 N O11 P 3                                                           |         |         |         |         |         |         |         |         |         |         |         |         |         |         |         |         |         |         |         |         |          |         |          |         |        |         |         |         |        |       |        |
| C14 H14 O2 P                                                               | 253925  | 229811  | 157858  | 272909  | 208445  | 205899  | 434350  | 660103  | 572342  | 539215  | 313271  | 766616  | 315088  | 342872  | 250022  | 184092  | 424274  | 775915  | 851974  | 812807  | 696382   | 224662  | 818679   | 758492  | 182829 | 840001  | 582796  | 510331  |        |       |        |
| C14 H14 S                                                                  |         |         |         |         |         |         |         |         |         |         |         |         |         |         |         |         |         |         |         |         |          |         |          |         |        |         |         |         |        |       |        |
| C24 H49 N2 O P 5                                                           |         |         |         |         |         |         |         |         |         |         |         |         |         |         |         |         |         |         |         |         |          |         |          |         |        |         |         |         |        |       |        |
| C6 H12 N6                                                                  | 91080   | 235895  | 307855  | 243202  |         |         |         |         |         |         |         |         |         |         |         |         |         |         |         |         |          |         |          |         |        |         |         |         |        |       |        |
| C24 H49 N5 O6 P 2                                                          | 3468961 | 3562684 | 3335363 | 3022516 | 2905695 | 2525626 | 273600  | 300102  | 289829  | 283035  | 302955  | 228324  | 71760   | 206255  | 273934  | 157179  | 342988  | 271272  | 397975  | 369414  | 510779   | 111294  | 10284    | 475331  | 243544 | 31098   | 300567  | 204018  | 395520 |       |        |
| C16 H18 O2 P 2                                                             | 57180   | 50405   | 56813   | 55244   | 49735   | 55244   | 49735   | 55244   | 49735   | 55244   | 49735   | 55244   | 49735   | 55244   | 49735   | 55244   | 49735   | 55244   | 49735   | 55244   | 49735    | 55244   | 49735    | 55244   | 49735  | 55244   | 49735   | 55244   | 49735  | 55244 |        |
| C12 H23 N O2                                                               | 76894   | 152815  | 136448  | 141678  | 134997  | 131350  | 201205  | 208707  | 206196  | 208542  |         |         |         |         | 118972  |         |         |         |         |         |          |         |          |         |        |         |         |         |        |       |        |
| C4 H4 N2 O2                                                                |         |         |         |         |         |         |         |         |         |         |         |         |         |         |         |         |         |         |         |         |          |         |          |         |        |         |         |         |        |       |        |
| C12 H23 N O3                                                               | 9938    | 10611   | 9627    | 9945    | 9459    | 9085    | 84828   | 92556   | 90437   | 86082   |         |         |         |         | 112643  | 42032   | 62116   | 85433   | 31616   | 86409   | 137897   | 230251  | 157215   | 207584  | 32788  | 225376  | 227641  | 11224   | 77485  | 52169 | 102346 |
| C12 H23 N O4                                                               | 230417  | 227656  | 210814  | 223480  | 213414  | 203030  | 446522  | 451515  | 438897  | 434550  | 1371700 | 545380  | 288563  | 63116   | 709978  | 87794   | 498917  | 373244  | 834250  | 279842  | 614381   | 65277   | 136002   | 617561  | 226964 | 75409   | 52169   | 162795  |        |       |        |
| C8 H14 N6 O2                                                               | 16807   | 20035   | 16741   | 24432   | 37574   | 22121   | 106526  | 100640  | 136186  | 122584  | 52293   | 182505  | 57172   | 87514   | 86925   | 112045  | 94418   | 123678  | 168618  | 121392  | 136130   | 55557   | 158300   | 123244  | 42850  | 176456  | 129794  | 180151  |        |       |        |
| C8 H14 N6 O3                                                               |         |         |         |         |         |         |         |         |         |         |         |         |         |         |         |         |         |         |         |         |          |         |          |         |        |         |         |         |        |       |        |
| C19 H37 N O4                                                               | 126262  | 125678  | 117992  | 113317  | 97648   | 88110   | 16127   |         |         |         |         |         |         |         | 12087   | 12455   |         |         |         |         |          |         |          |         |        |         |         |         |        |       |        |
| C22 H27 N3 S                                                               | 41583   | 47815   | 44664   | 45423   | 44064   | 42105   | 414193  | 428553  | 410770  | 427466  | 272645  | 295027  | 311183  | 328182  | 307640  | 318237  | 381590  | 455334  | 649562  | 430071  | 377182   | 413765  | 393836   | 352268  | 349286 | 371862  | 500313  | 541899  |        |       |        |
| C7 H20 N5 O2 P                                                             | 3833    |         |         |         |         |         |         |         |         |         |         |         |         |         |         |         |         |         |         |         |          |         |          |         |        |         |         |         |        |       |        |
| CYTOSINE (CAS# 71-30-7); (M+H) <sup>+</sup>                                |         |         |         |         |         |         |         |         |         |         |         |         |         |         |         |         |         |         |         |         |          |         |          |         |        |         |         |         |        |       |        |
| L-HISTIDINE (CAS# 71-00-1); (M+Na) <sup>+</sup>                            |         |         |         |         |         |         |         |         |         |         |         |         |         |         |         |         |         |         |         |         |          |         |          |         |        |         |         |         |        |       |        |
| Cl <sup>-</sup> , 7,10,13,16-DOCOSATETRAENOIC ACID (CAS# 28874-58-0); (M+) | 51840   | 53731   | 50174   |         |         |         |         |         |         |         |         |         |         |         |         |         |         |         |         |         |          |         |          |         |        |         |         |         |        |       |        |
| C24 H36 N6 O4 P 6                                                          | 31078   | 29918   | 32234   | 19986   | 29714   | 12536   | 25878   | 40900   | 31397   |         |         |         |         |         |         |         |         |         |         |         |          |         |          |         |        |         |         |         |        |       |        |
| C23 H49 N5 O9 P 3                                                          | 418353  | 421260  |         | 353301  | 409557  | 385470  | 85188   |         |         |         |         |         |         |         |         |         |         |         |         |         |          |         |          |         |        |         |         |         |        |       |        |
| C24 H50 N6 S2                                                              | 164208  |         |         |         |         |         |         |         |         |         |         |         |         |         |         |         |         |         |         |         |          |         |          |         |        |         |         |         |        |       |        |
| C8 H16 N7 O P                                                              |         |         |         |         |         |         |         |         |         |         |         |         |         |         |         |         |         |         |         |         |          |         |          |         |        |         |         |         |        |       |        |
| STACHYOSINE (CAS# 54261-98-2); (M+Na) <sup>+</sup>                         |         |         |         |         |         |         |         |         |         |         |         |         |         |         |         |         |         |         |         |         |          |         |          |         |        |         |         |         |        |       |        |
| HYPOXANTHINE (CAS# 68-94-0); (M+H) <sup>+</sup>                            | 1244599 | 1220877 | 1128955 | 1212671 | 1127630 | 1141635 | 8854164 | 9171860 | 8934224 | 7349395 | 102E+07 | 1762325 | 2224170 | 8162871 | 6139419 | 9008973 |         |         |         |         | 1.74E+07 | 3872628 | 1.18E+07 |         |        |         |         |         |        |       |        |
| C34 H48 O2 S                                                               | 4073255 | 3865085 | 3928105 | 3592397 | 3214132 | 2946880 | 151360  | 153493  |         |         |         |         |         |         |         |         |         |         |         |         |          |         |          |         |        |         |         |         |        |       |        |





|                                                      |         |         |         |         |        |         |         |         |         |         |          |         |        |         |         |         |         |         |         |         |         |         |         |         |         |         |         |         |       |
|------------------------------------------------------|---------|---------|---------|---------|--------|---------|---------|---------|---------|---------|----------|---------|--------|---------|---------|---------|---------|---------|---------|---------|---------|---------|---------|---------|---------|---------|---------|---------|-------|
| C30 H55 N O5 P4                                      | 513347  | 532607  | 668284  | 676711  | 457408 | 441531  | 173839  | 194025  | 127465  | 182320  | 234667   | 127988  | 53990  | 134009  | 164530  | 111409  | 225387  | 219715  | 230318  | 207076  | 286527  | 88334   | 266766  | 156827  | 15805   | 169161  | 118180  | 235903  |       |
| C18 H20 N P                                          | 5203    | 2990    | 3335    | 4410    |        |         | 54687   | 58814   | 53811   | 53964   |          | 60843   | 19901  | 27289   | 54051   | 19778   | 43556   | 63892   | 113582  | 65501   | 81803   | 17834   | 104262  | 91296   | 8844    | 42669   | 34870   | 65481   |       |
| BIS[2-ETHYLHEXYL]PHTHALATE (CAS# 117-81-7); (M+Na+)  | 2838541 | 2906889 | 2812278 | 2540504 | 766306 | 2145575 | 1792692 |         |         |         | 1.41E+07 |         |        |         | 906570  | 1702534 | 5315    | 351575  | 2147452 |         |         | 1984262 | 436497  | 845739  | 803630  | 1350317 | 1330197 |         |       |
| C11 H12 N10 O                                        |         | 4657    | 4272    |         |        |         | 98775   | 99149   | 97860   | 100836  | 2646     |         | 5019   |         | 8857    | 3392    | 4256    | 40979   | 4248    |         | 4502    | 48327   | 485     | 3208    |         | 9697    | 9178    |         |       |
| C21 H21 N5                                           | 4993    |         |         | 5131    | 4520   | 31200   | 36980   | 36029   | 35625   | 79607   | 21771    | 110355  | 15813  | 36147   | 15496   |         | 27864   | 55120   | 30281   | 17193   | 12532   | 10948   | 6927    | 29029   | 22870   | 21483   | 11335   |         |       |
| C26 H55 N12 O2 P                                     | 746954  | 702260  | 693983  | 506055  | 400898 | 330726  | 147781  | 9928    | 44013   | 39218   | 150449   | 5712    | 15092  |         |         |         | 27864   | 55120   | 30281   | 17193   | 12532   | 10948   | 6927    | 29029   | 55621   | 9278    | 73753   |         |       |
| C14 H24 N6 O                                         | 49558   | 223242  | 344994  | 238876  | 231212 | 705071  | 228140  | 244474  | 81926   | 91842   | 26882    | 726782  | 40812  | 43482   | 55708   | 28960   | 792590  | 59268   | 86582   | 818098  | 51364   | 27980   | 46187   | 51500   | 28010   | 75114   | 772739  | 665375  |       |
| C14 H26 N6 O                                         | 14002   | 22023   | 25133   | 19233   | 38146  | 30073   | 70577   | 29856   | 29601   | 17721   | 35165    |         | 9208   | 56192   |         |         | 32778   | 72914   | 64302   | 45486   | 47501   |         | 54644   | 47397   | 67972   | 22100   | 39882   |         |       |
| C23 H47 N4 O P S                                     |         |         | 25331   | 34760   |        |         | 63736   | 52635   | 71129   | 50995   | 32320    | 60550   | 217247 | 52806   | 60582   | 37440   | 52293   | 52973   | 68866   | 25437   | 87322   | 61080   | 182470  | 114379  | 125872  | 110020  | 61947   | 63366   |       |
| C22 H49 N7                                           |         |         |         |         |        |         | 33263   | 33247   | 40454   | 32543   | 9037     | 24807   |        | 13682   | 27818   | 13243   | 62629   | 82667   | 33677   | 59771   | 91187   | 39583   | 35980   | 44739   | 59756   | 104242  | 52652   |         |       |
| C9 H12 N6 P2                                         |         |         |         |         |        |         | 48008   | 47211   | 47238   | 45777   | 5233     | 32744   |        | 6411    | 5872    | 37239   | 61259   | 113961  | 174858  | 47208   | 31668   | 27833   | 77972   | 78850   |         | 140429  | 21030   | 103647  |       |
| C17 H18 N12                                          | 41330   | 48200   | 52472   | 44171   | 40789  | 46885   | 2199    |         |         |         |          |         |        |         |         |         | 1337    | 7857    |         |         |         | 6213    | 10392   |         | 5263    |         |         |         |       |
| C11 H10 N8 O3                                        |         |         |         |         |        |         | 69824   | 61822   | 62878   | 60619   |          |         |        |         |         |         | 6609    |         |         |         |         |         |         |         |         |         |         |         |       |
| C37 H77 N4 O P S3                                    | 26536   |         | 17658   | 8945    | 22268  | 17266   | 110877  | 88706   |         |         | 14948    | 88101   | 3283   |         | 25167   | 35091   | 194513  | 77632   |         | 67194   | 143561  |         | 650788  | 76163   | 24464   | 92405   | 64909   | 176340  |       |
| C34 H52 N6 O2 S                                      | 63849   |         | 67200   | 60958   | 57970  | 62583   | 123647  | 136017  | 140241  | 126711  | 103609   |         | 127351 | 106352  | 215109  | 87823   | 110271  | 92900   | 160036  | 100319  | 139715  | 92128   | 149632  | 167552  | 124736  | 249079  | 115295  | 130414  |       |
| C28 H24 N9 O P                                       | 35079   | 33783   | 32955   | 34286   | 32419  | 32152   | 16585   | 17197   | 17588   | 17316   | 11259    | 11223   |        | 1406    | 9224    | 11315   | 17413   | 79228   |         | 20771   | 29562   | 51245   | 3260    | 22100   | 28679   |         | 47512   | 5895    | 71752 |
| N-ACETYL-DL-METHIONINE (CAS# 1115-47-5); (M+H)+[H2O] |         |         |         |         |        |         | 2523    |         |         |         |          |         |        |         |         |         |         |         |         |         |         |         |         |         |         |         |         |         |       |
| C7 H19 N3                                            |         |         |         |         |        |         | 271053  | 312402  | 301524  | 316730  | 64831    | 1097112 | 311108 | 42026   | 86876   | 71202   | 324054  | 169322  | 601912  | 259506  | 203995  | 23942   | 693118  | 654301  | 65587   | 395365  | 367743  | 186465  |       |
| C27 H48 N6 O S2                                      |         | 35025   | 42748   |         | 47310  |         | 413585  | 412569  | 416146  | 409753  | 81232    | 67090   | 28168  | 19721   | 3513553 | 74248   | 178739  | 247737  | 205784  | 44603   | 24006   | 19815   | 30196   | 47892   | 968905  | 76410   | 54759   | 204814  |       |
| C11 H20 O3 P2 S                                      |         |         |         |         |        |         | 613501  | 630041  | 616066  | 615820  | 353189   | 527886  | 219557 | 169119  | 428640  | 432835  | 680087  | 622702  | 1179411 | 832308  | 1198015 | 312297  | 788304  | 744836  | 70521   | 901485  | 439145  | 972461  |       |
| C15 H20 N6 O3                                        | 480627  | 497431  | 481393  | 488781  | 496627 | 477268  | 467765  | 492826  | 480218  | 471688  | 424704   | 481595  | 490977 | 490695  | 460470  | 459112  | 495112  | 463468  | 424112  | 475007  | 456966  | 502662  | 430139  | 499768  | 458774  | 494725  | 518203  | 507656  |       |
| C23 H26 N3 P                                         | 11177   | 10650   | 12169   | 9195    | 9608   | 10011   | 21907   | 16595   | 25087   | 18823   | 27892    |         | 22854  | 9533    | 49868   | 16833   |         | 16392   |         | 8711    | 119141  | 12512   | 21768   | 12581   | 14644   | 12839   | 16386   |         |       |
| C15 H20 N6 O2                                        | 4385    | 145732  | 147449  | 146273  | 132857 | 153538  | 60737   | 60916   | 148910  | 58695   | 11465    | 46921   | 49433  | 49850   | 11743   | 13950   | 47002   | 52369   | 73004   | 45152   | 50763   | 157238  | 62387   | 55084   | 17633   | 195818  | 139023  | 180251  |       |
| C13 H25 N7 O                                         | 6972    | 11813   | 10073   | 9800    | 10147  | 17462   | 110685  | 120291  | 133286  | 108081  | 53403    | 198085  | 79912  | 62813   | 71433   | 94351   | 62588   | 66152   | 172376  | 138398  | 175821  | 125789  | 297603  | 163076  | 61223   | 66108   | 61757   | 102657  |       |
| C25 H51 N4 O                                         | 30699   | 27701   |         | 32277   | 29577  | 30538   | 52040   | 44376   | 38588   | 40672   | 50663    | 59151   | 19363  | 19067   | 42259   | 56391   | 56130   | 34076   | 58590   | 106434  | 153855  | 44290   | 41297   | 31605   | 17987   | 39901   | 48458   | 151183  |       |
| C17 H28 N2 O4                                        | 1302562 | 1336779 | 1289151 | 3194    | 133514 | 567307  | 431853  | 424813  | 73862   |         | 97128    | 562635  |        | 126834  | 196313  | 113438  | 269159  | 482961  | 2208    | 289096  | 934591  | 980500  | 411360  | 2065    | 608464  | 458731  | 1034285 |         |       |
| C5 H4 N4 O2 S                                        | 4401    | 42463   | 31838   |         |        |         | 77832   | 91144   | 103189  | 96683   |          | 39814   |        | 38891   | 697309  | 40437   | 24825   | 7877    | 17375   | 37312   | 34727   | 48297   | 14456   | 42493   | 12505   | 26366   | 36033   | 28928   |       |
| C5 H4 N4 P2                                          | 164374  | 159505  | 155801  | 155887  |        | 149510  | 524124  | 553755  | 535052  | 537816  | 1248215  | 1941941 | 263331 | 920554  | 1205077 | 721267  | 369512  | 241214  | 592140  | 317862  | 381636  | 92633   |         |         | 17900   | 303639  | 331397  | 403831  |       |
| C35 H50 N O10 P S2                                   | 191313  | 188785  | 201347  | 171622  | 162818 | 152152  | 17983   | 19535   | 11364   | 11809   | 12167    | 12424   |        | 9043    | 7095    | 4549    | 11369   | 20411   | 15846   | 30662   | 25470   |         | 12115   | 14972   |         | 18816   | 10088   | 14675   |       |
| RAFFINOSE (CAS# 512-69-6); (M+K)+                    |         |         |         |         |        |         | 5900    | 5292    | 6894    | 6114    | 1994     | 4802    |        | 6999    | 4313    | 6931    |         |         |         | 4040    | 6084    | 2414    |         |         | 7856    | 1114    | 13734   | 5226    |       |
| C17 H36 N4 O10 S                                     |         |         |         |         |        |         | 71183   | 79817   | 81480   | 76684   | 239611   | 19706   | 414683 | 9750    | 51730   | 22754   | 11096   | 19692   | 26950   | 18429   | 15346   |         | 16009   |         |         | 14546   | 29214   | 17109   |       |
| NICOTINAMIDE (CAS# 98-92-0); (M+H)+                  | 120009  | 114097  | 105979  | 118009  | 109043 | 106190  | 1153554 | 1195240 | 1125611 | 1145077 | 970252   | 906776  | 256746 | 29340   | 1617502 | 477448  | 1330384 |         |         | 2187693 | 2458456 | 348180  | 1430661 | 1206666 | 106062  |         |         | 5709    |       |
| C37 H49 N O8 S                                       | 114377  | 5133    | 118082  | 5050    | 21235  | 177155  | 12953   |         |         |         | 12465    |         | 18405  |         |         |         |         |         |         |         |         |         | 5303    |         |         |         |         |         |       |
| C32 H63 N4 O6 P S                                    |         |         |         | 17407   |        |         | 49035   | 45376   | 84373   | 49445   |          |         | 48733  | 35763   | 13378   | 43410   | 195257  | 82844   | 208361  | 14717   | 250922  | 18048   | 79286   | 18503   | 21276   | 35959   |         | 208581  |       |
| C5-VACCINIC ACID (CAS# 506-17-2); (M+H)+             | 19140   | 21193   | 21733   |         |        |         | 9936    | 10221   |         |         | 6403     |         |        | 2967    |         | 5520    |         |         |         | 11159   |         | 9207    |         |         |         | 7891    | 13213   |         |       |
| C5 H15 N4 O3 P                                       | 93057   | 109624  | 105447  | 105950  | 101136 | 88079   | 324103  | 318626  | 329613  | 322189  | 201640   | 184390  | 103987 | 131847  | 462358  | 271747  | 199416  | 347399  | 383195  | 273867  | 386432  | 169174  | 281131  | 223145  | 137194  | 325344  | 185320  | 470265  |       |
| C13 H27 N5 P                                         | 64616   | 61360   | 57962   | 56588   | 53371  | 45238   | 95490   | 90666   | 89682   | 91047   | 26908    | 5134    |        | 21173   | 38954   | 54112   | 110692  | 630993  | 1213888 | 109976  | 165456  | 2143    | 71215   | 43432   |         | 66903   | 53669   | 124279  |       |
| C33 H67 N4 O11 P                                     | 756782  | 559663  | 745679  | 721727  | 742004 | 730583  | 1341339 | 1337638 | 1336768 | 1297100 | 959671   | 1209037 | 975156 | 1073990 | 2619006 | 803611  | 1098379 | 1191786 | 1855981 | 1113729 | 1190372 | 1047010 | 1434895 | 1544952 | 1112250 | 2279234 | 1312551 | 1349007 |       |
| C15 H28 N6 O2                                        |         | 18542   | 12145   | 14663   | 27348  | 35355   | 92056   | 93425   | 88110   | 78644   | 64404    | 75810   | 83502  | 62812   | 251459  | 80130   | 37440   | 44064   | 74350   | 80190   | 47316   | 74247   | 73116   | 73697   | 36299   | 81675   | 8519    | 98943   |       |
| C31 H43 N5 O12                                       | 366480  | 346603  | 376838  | 367459  | 341637 | 338206  | 58382   | 59247   | 64441   | 61724   | 56644    | 52466   | 18174  | 63083   | 37664   | 29967   | 47933   | 88502   | 109653  | 90942   | 25468   | 74646   | 51441   | 36543   | 35499   | 48194   | 68194   | 67505   |       |
| C22 H20 O5                                           | 12395   | 12779   | 13103   | 14751   |        |         | 50291   | 54604   | 55802   | 49805   | 43512    | 25686   | 25555  | 19555   | 87666   | 33684   | 21092   | 26015   | 33535   | 23429   | 22514   | 26313   | 57230   | 16281   | 16796   | 52069   | 46215   | 32625   |       |
| C17 H34 N6 O6 S2                                     |         |         |         |         |        |         | 37567   | 38547   | 37271   | 36929   | 130336   | 7589    | 262793 |         | 21094   | 7623    |         |         |         | 11611   |         | 4656    |         |         |         |         |         |         |       |
| C30 H51 O6 P S                                       | 57055   | 59891   | 55818   | 63398   | 57961  | 58849   | 82028   | 77335   | 80620   | 81044   | 88623    | 83471   | 80169  | 98840   | 82060   | 81137   | 84655   | 90512   | 93672   | 78379   | 90857   | 109844  | 90630   | 98062   | 131340  | 111726  | 97293   | 94923   |       |
| THEOPHYLLINE (CAS# 58-55-9); (M+Na+)                 | 106631  | 108422  | 100210  | 106745  | 101490 | 93345   | 18460   | 18025   | 18062   | 2378    | 16097    |         |        |         |         |         |         |         |         | 7280    | 34267   | 7584    | 91024   | 19432   |         |         |         | 39845   |       |
| MONO-METHYL GLUTARATE (CAS# 1501-27-5); (M+Na+)      |         |         |         | 33046   |        |         | 24832   |         | 36637   | 37173   | 38287    | 19410   |        |         |         |         |         |         |         | 35562   | 20366   |         | 50137   | 21705   | 31340   | 5754    |         | 70349   |       |
| C20 H39 N4 O                                         | 45968   | 44265   | 43206   | 46206   | 45113  | 42015   | 5692    |         |         | 6644    | 7728     |         |        | 1501    | 1148    |         |         |         |         |         |         | 9709    |         | 4043    | 16275   |         |         |         |       |





|                                                         |          |          |          |          |          |          |         |         |         |         |         |         |          |         |         |         |          |          |          |          |          |          |          |          |         |          |         |          |        |        |         |
|---------------------------------------------------------|----------|----------|----------|----------|----------|----------|---------|---------|---------|---------|---------|---------|----------|---------|---------|---------|----------|----------|----------|----------|----------|----------|----------|----------|---------|----------|---------|----------|--------|--------|---------|
| C26 H40 S                                               | 4969     |          |          | 24399    | 22238    | 281380   | 301594  | 300076  | 282714  | 324831  | 756604  | 157262  | 146348   | 188656  | 147234  | 689602  | 488375   | 472438   | 220218   | 368439   | 107923   | 300285   | 258945   | 82534    | 330054  | 265881   | 607223  |          |        |        |         |
| N-ACETYL-DL-GLUTAMIC ACID [CAS# 5817-08-3]; (M+H)+[H2O] |          |          |          |          |          | 1126     |         |         |         |         |         | 2679    |          |         |         |         |          |          |          |          |          |          |          |          |         |          | 1909    |          |        |        |         |
| C34 H46 N12                                             | 32959    | 35673    | 48333    | 44685    | 47863    | 31222    | 5571    |         |         |         | 16128   |         | 28902    |         |         |         | 10784    |          | 24138    | 8875     |          |          | 43268    |          | 8081    | 29271    | 11816   |          |        |        |         |
| C5 H7 N O3                                              | 1508935  | 1464110  | 1415897  | 1550969  | 1404236  | 1448504  | 8581064 | 8808021 |         | 803916  | 3911514 |         | 1333799  | 1404106 | 5111950 | 9046911 |          |          |          | 4489097  | 1630579  | 1.27E+07 | 1.51E+07 | 779938   |         | 6991759  |         |          |        |        |         |
| C4 H9 O2 P                                              |          |          |          |          |          | 158834   | 353229  | 153477  | 149193  | 42645   | 398501  |         | 31960    | 48275   | 1525589 | 161058  | 1.48E+07 |          | 246178   | 124957   | 1570492  | 378889   | 46645    | 6714     | 650032  | 193155   | 927506  |          |        |        |         |
| QUINOLIN-2-OL [CAS# 59-31-4]; (M+Na)+                   | 7365     |          | 4645     | 9036     | 6589     | 6381     | 22333   | 25232   | 23051   | 20357   | 9548    | 18748   |          | 17563   | 23345   | 25720   | 36842    | 14301    | 18652    | 21410    | 44828    | 32732    | 16861    | 33475    | 22247   | 21201    |         |          |        |        |         |
| C20 H29 N4 O5 P                                         | 65490    | 33374    |          |          | 49657    | 50347    | 724880  | 839999  | 760187  | 829045  | 316941  | 427062  | 529961   | 644891  | 4809473 | 353272  | 397232   | 624403   | 650318   | 662573   | 675992   | 481007   | 737084   | 358938   | 546337  | 203930   | 608648  | 680803   |        |        |         |
| C25 H26 N4 O2                                           | 231813   | 224879   | 219922   | 248582   | 241358   | 236338   | 2819952 | 3064534 | 3071510 | 3055087 | 1852589 | 2262851 | 2280208  | 2315282 | 3480921 | 1996015 | 2063343  | 2724388  | 2859603  | 2577651  | 3135261  | 2430567  | 3357174  | 2304611  | 2178933 | 2873287  | 3005483 | 3201103  |        |        |         |
| C14 H27 N4 P3                                           | 10412    | 10153    | 12044    | 12002    | 13667    | 11667    | 196739  | 190452  | 187264  | 187059  | 10175   | 9810    | 10719    | 8400    | 56205   | 10906   | 12491    | 12457    | 96475    | 11659    | 9788     | 12850    | 75564    | 8904     | 18297   | 9890     | 15553   | 13228    |        |        |         |
| C21 H17 N                                               |          |          |          |          | 1914     | 6202     |         |         |         | 73432   | 302906  | 18830   |          |         |         |         |          |          |          |          |          |          | 91367    |          |         | 122147   |         | 37846    |        |        |         |
| C12 H11 N9 O                                            |          |          | 11153    | 24981    | 22833    |          | 53521   | 51787   | 53701   | 53150   | 103135  | 216909  | 15304    | 94727   | 94392   | 93951   | 65724    | 59971    | 104570   | 51894    | 106964   | 22375    | 43180    | 36326    | 2642    | 72424    | 38416   | 69348    |        |        |         |
| C20 H35 N4 P3                                           | 60616    | 71965    | 63396    | 59759    | 59084    | 58152    | 109030  | 119229  | 116802  | 121924  | 76713   | 140491  | 102920   | 140061  | 85549   | 97980   | 102134   | 78548    | 100162   | 81215    | 115737   | 90971    | 126939   | 173300   | 95903   | 97174    | 108876  | 90816    |        |        |         |
| C15 H31 N4 O2 P                                         | 72213    | 82800    | 81544    | 70562    | 89486    | 88911    | 159124  | 192803  | 186897  | 181585  | 89841   | 1390372 | 92512    | 93356   | 183894  | 83133   | 134346   | 100188   | 158325   | 64809    | 79058    | 64212    | 137005   | 159626   | 107034  | 157159   | 145838  | 104574   |        |        |         |
| C15 H15 N3 O S                                          | 1558     | 2568     | 2787     |          |          | 1171     | 81029   | 84303   | 74058   | 75783   | 595326  | 73293   | 8484     | 154611  | 92885   | 69356   |          |          |          | 2152     | 169019   | 53331    | 62397    | 98848    | 91540   | 81027    | 124526  |          |        |        |         |
| PHENYLALANINE [CAS# 63-91-2]; (M+H)+                    | 1.56E+07 | 1.54E+07 | 1.45E+07 | 1.56E+07 | 1.49E+07 | 1.48E+07 | 9126915 | 9281787 | 9064085 | 9114624 | 7775118 | 7308179 | 1009688  | 3440474 | 6850878 | 7463582 | 9234501  | 1.83E+07 | 1.83E+07 | 1.05E+07 | 1.57E+07 | 4628126  | 9988971  | 1.23E+07 | 316891  | 1.55E+07 | 5764731 | 1.80E+07 |        |        |         |
| C14 H27 N7 O                                            | 13291    |          |          | 11939    |          |          | 75211   | 89615   | 75150   | 71461   | 29220   | 131297  | 53013    | 38086   | 52250   | 65886   | 35045    | 46569    | 139766   | 106049   | 129610   | 82989    | 238617   | 123073   | 36105   | 33790    | 67049   |          |        |        |         |
| L-HISTIDINE [CAS# 71-00-1]; (M+H)+                      | 6617     |          |          | 15985    | 5895     |          | 36267   | 40082   | 38403   | 40366   | 23219   | 111091  | 4435     | 19534   | 6333    | 137779  | 29195    | 25708    | 21311    | 7161     | 3985     | 55787    | 22474    | 68525    | 34297   | 47753    | 16268   | 16355    |        |        |         |
| C34 H68 N2 O9 S2                                        | 19928    | 15631    | 15056    | 16538    |          | 15005    | 254985  | 247580  | 264323  | 249800  | 77601   | 100353  | 12538    | 40338   | 2589935 | 31922   | 96811    | 100714   | 67294    | 37602    | 26376    | 36899    | 19666    | 25848    | 303434  | 87473    | 62587   | 100434   |        |        |         |
| C36 H66 N O P                                           | 82614    | 89760    | 7917     | 12928    | 4273     | 236197   | 11320   | 13662   | 18660   |         | 19185   | 1543    | 17256    | 18411   | 14184   |         | 20183    | 21948    | 34533    | 32096    | 2285     | 24994    | 18792    | 4477     | 14604   | 16929    | 31236   |          |        |        |         |
| C39 H48 O2 P4                                           | 131242   | 18331    | 131692   | 142477   | 117167   | 120991   | 28270   | 33971   | 30072   | 30694   | 28925   | 27319   | 6799     | 19139   | 20570   | 10557   | 6500     | 40364    | 31736    | 58889    | 45807    | 8892     | 35077    | 24600    |         | 31292    | 22450   | 36792    |        |        |         |
| C27 H51 O4 P S2                                         | 109527   | 101594   | 108795   | 115547   | 99092    | 104158   | 153828  | 125934  | 131872  | 130419  | 124698  | 115153  | 113506   | 142616  | 123004  | 123906  | 126755   | 123895   | 120141   | 104117   | 115202   | 148190   | 122414   | 134489   | 188472  | 152261   | 60489   | 125861   |        |        |         |
| C29 H32 N18 P2                                          | 50132    | 47230    | 48479    | 46509    | 48074    | 44243    | 74729   | 72036   | 66494   | 67317   | 62242   | 65502   | 58251    | 66588   | 71858   | 62399   | 60375    | 62935    | 68834    | 58021    | 62941    | 75329    | 69135    | 69247    | 80738   | 74109    | 70134   | 74243    |        |        |         |
| C25 H53 N O2                                            |          |          |          |          |          |          | 108493  | 108171  | 105268  | 112398  | 15394   | 36954   |          |         | 24939   | 70227   | 141604   | 320373   | 197463   | 258248   | 491769   | 152425   | 152081   | 144517   | 5758    | 226546   | 532658  | 329154   |        |        |         |
| C17 H29 N O S                                           |          |          |          |          |          | 18149    | 17642   | 21696   | 19811   |         |         |         |          |         |         |         |          |          |          |          |          |          |          | 1581     |         |          |         |          |        |        |         |
| C32 H69 N4 P S4                                         | 24537    | 20853    | 4656     | 18437    | 11144    | 3826     | 20687   | 19526   | 1806    |         | 4454    | 42762   |          | 15998   | 10635   | 40990   |          |          | 27785    | 36989    | 67166    |          | 69586    | 28181    |         | 9062     | 41536   |          |        |        |         |
| C50 H93 N3                                              |          |          |          | 195198   | 17044    | 180673   | 316933  | 559489  |         | 552378  | 150563  | 50453   | 225482   | 688976  | 323907  | 586401  |          |          |          |          |          |          | 361854   |          | 41528   | 195530   | 1041431 | 183837   |        |        |         |
| C26 H44 O4                                              |          |          |          | 7095     |          |          | 41582   |         | 36333   |         | 33035   | 216236  | 34457    |         |         |         |          |          | 8859     | 42843    | 57850    | 42677    |          |          |         |          |         |          |        |        |         |
| C30 H59 N O4 S5                                         | 198388   | 15070    | 193152   | 202738   | 188326   | 185258   | 58203   | 47896   | 49764   | 41558   | 41343   | 36799   | 8198     | 30499   | 26719   | 5644    | 36157    | 51118    | 67961    | 60387    | 18021    | 56477    | 43095    |          | 43781   | 25795    | 50569   |          |        |        |         |
| C16 H24 N6                                              | 520241   | 545424   | 543963   | 543482   | 522173   | 509934   | 21396   | 21127   | 31045   | 23763   | 15305   | 18759   |          | 10315   | 8865    |         | 17074    | 70566    | 80439    | 61354    | 85495    | 5572     | 37473    | 50645    | 49829   | 45734    | 13942   | 91917    |        |        |         |
| 16:0-LYSO PC [CAS# 17364-16-8]; (M+Na)+                 | 1.71E+07 | 1.62E+07 | 1.71E+07 | 1.62E+07 | 1.50E+07 | 1.44E+07 | 784305  | 707374  | 694836  | 639740  | 58480   | 288620  | 149226   | 185740  | 28665   | 445428  | 423275   | 753542   | 572071   | 1417201  | 1257295  | 395035   | 701468   | 611490   | 69247   | 394117   | 321508  | 1013916  |        |        |         |
| C13 H11 O5 P                                            | 47809    | 46173    | 44649    | 49252    | 46022    | 44633    | 4417    |         | 4646    |         |         |         |          | 6633    | 10320   | 2612    | 8902     | 15209    | 21783    | 17115    | 17089    |          | 15831    | 15792    | 19505   | 9950     | 26805   |          |        |        |         |
| C26 H50 N10 O11 P                                       | 3546310  | 3597111  | 3515181  | 3298222  | 3121848  | 3005533  | 305535  | 308724  | 289911  | 436692  | 282657  | 96764   | 245367   | 303015  | 233921  | 148903  | 329745   | 203347   | 468562   | 353705   | 157046   | 317153   | 257944   | 28237    | 175948  | 141147   | 343439  |          |        |        |         |
| C17 H22 N10 P2                                          | 24316    | 25744    | 25356    | 20603    | 22867    | 24563    | 15495   | 1651    | 14099   | 13925   | 11665   | 65187   |          | 6633    | 10320   | 2612    | 8902     | 15209    | 21783    | 17115    | 17089    |          | 15831    | 15792    | 19505   | 9950     | 26805   |          |        |        |         |
| C6 H4 O                                                 |          |          |          |          |          |          | 102509  | 105930  | 105598  | 105754  | 74738   |         |          | 10003   | 21218   | 15173   | 14436    | 197490   | 210237   | 261521   | 150461   | 210170   | 72486    | 64901    | 133074  | 169076   |         | 21622    |        |        |         |
| C23 H41 N                                               | 39319    | 39597    | 36714    | 44813    | 38655    | 39510    | 202768  | 213205  | 200578  | 189817  | 35502   | 47732   | 46321    | 17779   | 437828  | 47969   | 49850    | 68556    | 76023    | 50989    | 111925   | 23070    | 63263    | 60010    | 40361   | 48645    | 43666   | 89095    |        |        |         |
| C13 H25 N O2                                            |          |          |          | 40106    | 847716   | 875428   | 855467  | 867975  | 888087  | 1374371 | 620939  | 497291  | 588286   | 729896  | 433922  | 504809  | 1279259  | 1008324  | 134191   | 943609   | 2058298  | 134191   | 943609   | 2058298  | 134191  | 943609   | 2058298 | 134191   |        |        |         |
| C15 H19 N4 O3 P                                         | 360882   | 364521   | 362822   | 389245   | 385902   | 389392   | 2590443 | 2921888 | 2907114 | 2846185 | 6571429 | 1598718 | 1.01E+07 | 1003575 | 2641633 | 1125242 | 985799   | 661885   | 1423185  | 823113   | 667002   | 479199   | 2274848  | 554288   | 657667  | 1634453  | 1599049 | 847934   |        |        |         |
| C24 H54 N12 S2                                          |          |          |          | 7533     |          |          | 1592    | 249186  | 282190  | 258895  | 284000  | 269129  | 123654   | 51088   | 92880   | 94720   |          | 489044   | 71922    | 266991   | 267683   | 354214   | 59888    | 721717   | 74840   | 116825   | 328030  | 341731   |        |        |         |
| C13 H25 N O4                                            |          |          |          | 76637    | 74641    | 64742    | 62380   | 56439   | 50452   | 21011   | 19309   | 20070   | 18761    | 15801   | 8806    | 2636    |          | 36795    | 14448    | 35889    | 57462    | 39821    | 5454     | 17556    | 12433   |          |         | 103022   |        |        |         |
| ALANINE [CAS# 56-41-7]; (M+H)+                          |          |          |          | 2449     | 4770     |          | 5825    | 3945    |         |         |         |         |          |         |         |         |          |          |          |          |          |          | 3677     |          |         |          |         |          |        |        |         |
| C13 H25 N O3                                            |          |          |          | 68827    | 71627    | 68122    | 67215   | 70916   | 63499   | 831233  | 871228  | 847731  | 835084   | 251780  | 923453  | 291066  | 434455   | 847071   | 285266   | 641568   | 979374   | 1710076  | 1037824  | 1300115  | 258624  | 1629328  | 1414689 | 115511   | 681456 | 571133 | 1031048 |
| C25 H51 N5 O10 S                                        | 858057   | 920408   | 815778   | 401038   | 785877   | 715228   | 294486  | 286698  | 53498   | 5920    | 36597   | 1327214 | 43577    |         | 113352  | 122222  | 49413    | 31822    | 79534    | 45929    | 14385    | 111551   | 25363    | 26368    | 95038   | 79961    | 44434   |          |        |        |         |
| C9 H20 N8 O2 S                                          |          |          |          |          |          |          | 164476  | 174177  | 171393  | 158467  |         |         |          |         |         |         |          |          |          |          |          |          |          |          |         |          |         |          |        |        |         |
| C27 H41 N5                                              | 103122   | 104297   | 96739    |          | 95518    | 16022    | 88590   | 69668   | 3334    |         |         |         |          |         |         |         |          |          |          |          |          | 75400    |          | 98940    |         | 35661    | 5961    | 57987    | 83539  |        |         |
| C9 H7 C12 N5                                            | 184287   | 186496   | 174482   | 186226   | 180191   | 172597   | 382964  | 396984  | 380967  | 371301  |         |         | 8120     |         |         |         |          |          |          |          |          |          | 3719618  |          |         |          |         |          |        |        |         |
| C19 H41 N3 O3                                           | 227090   | 613016   | 228050   |          | 22084    | 32581    | 3669679 | 3131445 |         |         |         |         | 5553692  | </      |         |         |          |          |          |          |          |          |          |          |         |          |         |          |        |        |         |























| Compound                                                                                        | Pos_Human Plasma Extrac | Pos_Pool OC 1 | Pos_Pool OC 2 | Pos_Pool OC 3 | Pos_Pool OC 4 | Pos_S00015447_1 | Pos_S00015448_2 | Pos_S00015449_3 | Pos_S00015450_4 | Pos_S00015451_5 | Pos_S00015452_6 | Pos_S00015453_7 | Pos_S00015454_8 | Pos_S00015455_9 | Pos_S00015456_10 | Pos_S00015457_11 | Pos_S00015458_12 | Pos_S00015459_13 | Pos_S00015460_14 | Pos_S00015461_15 | Pos_S00015462_16 | Pos_S00015463_17 | Pos_S00015464_18 |  |  |  |
|-------------------------------------------------------------------------------------------------|-------------------------|-------------------------|-------------------------|-------------------------|-------------------------|-------------------------|---------------|---------------|---------------|---------------|-----------------|-----------------|-----------------|-----------------|-----------------|-----------------|-----------------|-----------------|-----------------|------------------|------------------|------------------|------------------|------------------|------------------|------------------|------------------|------------------|--|--|--|
| (-)-COTININE (CAS# 486-56-6); (M+H)+                                                            | 125925                  |                         |                         |                         |                         |                         |               |               |               |               |                 |                 |                 |                 |                 |                 |                 |                 |                 |                  |                  |                  |                  |                  |                  |                  |                  |                  |  |  |  |
| (-)-SALSOLINOL (CAS# 27740-96-1); (M+H)+                                                        |                         |                         |                         |                         |                         |                         |               |               |               |               |                 |                 |                 |                 |                 |                 |                 |                 |                 |                  |                  |                  |                  |                  |                  |                  |                  |                  |  |  |  |
| (2-AMINOETHYL)PHOSPHONATE (CAS# 2041-14-7); (M+H)+                                              |                         |                         |                         |                         |                         |                         |               |               |               |               |                 |                 |                 |                 |                 |                 |                 |                 |                 |                  |                  |                  |                  |                  |                  |                  |                  |                  |  |  |  |
| (2-AMINOETHYL)PHOSPHONATE (CAS# 2041-14-7); (M+Na)+                                             |                         |                         |                         |                         |                         |                         |               |               |               |               |                 |                 |                 |                 |                 |                 |                 |                 |                 |                  |                  |                  |                  |                  |                  |                  |                  |                  |  |  |  |
| (S)-2-AMINO-3-(3-HYDOXY-4-OXO-4H-PYRIDIN-1-YL)PROPANOATE OR L-MIMOSINE (CAS# 500-44-7); (M+Na)+ |                         |                         |                         |                         |                         |                         |               |               |               |               |                 |                 |                 |                 |                 |                 |                 |                 |                 |                  |                  |                  |                  |                  |                  |                  |                  |                  |  |  |  |
| (S)-DIHYDROOROTATE (CAS# 5988-19-2); (M+H)+                                                     |                         |                         |                         |                         |                         |                         |               |               |               |               |                 |                 |                 |                 |                 |                 |                 |                 |                 |                  |                  |                  |                  |                  |                  |                  |                  |                  |  |  |  |
| 1,2-DIPALMITOYL-SN-GLYCEROL (CAS# 30334-71-5); (M+Na)+                                          | 115880                  | 122615                  | 181660                  |                         |                         |                         | 96941         |               |               |               |                 |                 |                 |                 |                 |                 |                 |                 |                 |                  |                  |                  |                  |                  |                  |                  |                  |                  |  |  |  |
| 1,3-DIAMINOPROPANE (CAS# 109-76-2); (M+H)+                                                      |                         |                         |                         |                         |                         |                         | 2201          |               |               |               |                 |                 |                 |                 |                 |                 |                 |                 |                 |                  |                  |                  |                  |                  |                  |                  |                  |                  |  |  |  |
| 1,3-DIELAIDIN (CAS# 98168-52-6); (M+Na)+                                                        | 32038                   | 12827                   | 3644378                 |                         |                         |                         | 394182        |               |               |               |                 |                 |                 |                 |                 |                 |                 |                 |                 |                  |                  |                  |                  |                  |                  |                  |                  |                  |  |  |  |
| 1,3-DIMETHYLURIC ACID (CAS# 944-73-0); (M+Na)+                                                  |                         |                         |                         |                         |                         |                         |               |               |               |               |                 |                 |                 |                 |                 |                 |                 |                 |                 |                  |                  |                  |                  |                  |                  |                  |                  |                  |  |  |  |
| 10-HYDROXYDECANOATE (CAS# 1679-53-4); (M+Na)+                                                   |                         |                         |                         |                         |                         |                         |               |               |               |               |                 |                 |                 |                 |                 |                 |                 |                 |                 |                  |                  |                  |                  |                  |                  |                  |                  |                  |  |  |  |
| 11BETA-HYDROXYANDROST-4-ENE-3,17-DIONE (CAS# 382-44-5); (M+Na)+                                 |                         |                         |                         |                         |                         |                         |               |               |               |               |                 |                 |                 |                 |                 |                 |                 |                 |                 |                  |                  |                  |                  |                  |                  |                  |                  |                  |  |  |  |
| 11-DEOXYCORTICOSTERONE (CAS# 64-85-7); (M+Na)+                                                  |                         |                         |                         |                         |                         |                         |               |               |               |               |                 |                 |                 |                 |                 |                 |                 |                 |                 |                  |                  |                  |                  |                  |                  |                  |                  |                  |  |  |  |
| 11-DEOXYCORTISOL (CAS# 152-58-9); (M+H)+                                                        |                         |                         |                         |                         |                         |                         |               |               |               |               |                 |                 |                 |                 |                 |                 |                 |                 |                 |                  |                  |                  |                  |                  |                  |                  |                  |                  |  |  |  |
| 11-DEOXYCORTISOL (CAS# 152-58-9); (M+Na)+                                                       | 24829                   | 13525                   | 21656                   | 14929                   | 15068                   |                         |               |               |               |               |                 |                 |                 |                 |                 |                 |                 |                 |                 |                  |                  |                  |                  |                  |                  |                  |                  |                  |  |  |  |
| 16:0 LYSO PC (CAS# 17364-16-8); (M+H)+                                                          | 238740                  | 192398                  | 2318105                 | 2012893                 | 1788653                 | 1626678                 |               |               |               |               |                 |                 |                 |                 |                 |                 |                 |                 |                 |                  |                  |                  |                  |                  |                  |                  |                  |                  |  |  |  |
| 16:0 LYSO PC (CAS# 17364-16-8); (M+Na)+                                                         | 1.71E+07                | 1.62E+07                | 1.71E+07                | 1.62E+07                | 1.50E+07                | 1.44E+07                | 784305        | 707374        | 694836        | 639740        | 504810          | 288620          | 149226          | 185740          | 234786          | 445428          | 423725          | 753542          | 572071          | 1417201          | 1257295          | 395035           | 701468           | 611490           | 67947            | 394117           | 321508           | 1013916          |  |  |  |
| 16:0-18:0 PC (CAS# 59403-51-9); (M+H)+                                                          |                         |                         |                         |                         |                         |                         |               |               |               |               |                 |                 |                 |                 |                 |                 |                 |                 |                 |                  |                  |                  |                  |                  |                  |                  |                  |                  |  |  |  |
| 16:0-18:0 PC (CAS# 59403-51-9); (M+Na)+                                                         |                         |                         |                         |                         |                         |                         |               |               |               |               |                 |                 |                 |                 |                 |                 |                 |                 |                 |                  |                  |                  |                  |                  |                  |                  |                  |                  |  |  |  |
| 17ALPHA,20ALPHA-DIHYDROXYPREGN-4-EN-3-ONE (CAS# 652-69-7); (M+H)+                               | 1368                    | 1226                    |                         |                         |                         |                         |               |               |               |               |                 |                 |                 |                 |                 |                 |                 |                 |                 |                  |                  |                  |                  |                  |                  |                  |                  |                  |  |  |  |
| 17ALPHA-HYDROXYPROGESTERONE (CAS# 68-96-2); (M+Na)+                                             |                         |                         |                         |                         |                         |                         |               |               |               |               |                 |                 |                 |                 |                 |                 |                 |                 |                 |                  |                  |                  |                  |                  |                  |                  |                  |                  |  |  |  |
| 18:0 LYSO-PE (CAS# 69747-55-3); (2M+H)+                                                         |                         |                         |                         |                         |                         |                         |               |               |               |               |                 |                 |                 |                 |                 |                 |                 |                 |                 |                  |                  |                  |                  |                  |                  |                  |                  |                  |  |  |  |
| 18:0 LYSO-PE (CAS# 69747-55-3); (2M+Na)+                                                        |                         |                         |                         |                         |                         |                         |               |               |               |               |                 |                 |                 |                 |                 |                 |                 |                 |                 |                  |                  |                  |                  |                  |                  |                  |                  |                  |  |  |  |
| 18:0 LYSO-PE (CAS# 69747-55-3); (M+H)+                                                          |                         |                         |                         |                         |                         |                         |               |               |               |               |                 |                 |                 |                 |                 |                 |                 |                 |                 |                  |                  |                  |                  |                  |                  |                  |                  |                  |  |  |  |
| 18:0 LYSO-PE (CAS# 69747-55-3); (M+Na)+                                                         |                         |                         |                         |                         |                         |                         |               |               |               |               |                 |                 |                 |                 |                 |                 |                 |                 |                 |                  |                  |                  |                  |                  |                  |                  |                  |                  |  |  |  |
| 1-AMINOCYCLOPROPANE-1-CARBOXYLATE (CAS# 22059-21-8); (M+H)+                                     | 42601                   | 62235                   | 59848                   | 58322                   | 54484                   | 65647                   | 11734         | 37209         | 15955         | 12817         | 16210           | 17170           |                 | 5414            | 13874           | 14652           | 31852           |                 |                 |                  |                  |                  |                  |                  |                  |                  |                  |                  |  |  |  |
| 1-METHYLADENOSINE (CAS# 15763-06-1); (M+H)+                                                     | 10073                   | 10017                   | 10421                   | 11568                   | 10835                   | 12770                   | 1872          |               |               |               |                 |                 |                 |                 |                 |                 |                 |                 |                 |                  |                  |                  |                  |                  |                  |                  |                  |                  |  |  |  |
| 1-METHYLADENOSINE (CAS# 15763-06-1); (M+Na)+                                                    |                         |                         |                         |                         |                         |                         |               |               |               |               |                 |                 |                 |                 |                 |                 |                 |                 |                 |                  |                  |                  |                  |                  |                  |                  |                  |                  |  |  |  |
| 1-METHYLANTHINE (CAS# 6136-37-4); (M+H)+                                                        |                         |                         |                         |                         |                         |                         |               |               |               |               |                 |                 |                 |                 |                 |                 |                 |                 |                 |                  |                  |                  |                  |                  |                  |                  |                  |                  |  |  |  |
| 1-METHYLANTHINE (CAS# 6136-37-4); (M+Na)+                                                       | 2693                    |                         | 3272                    | 1695                    | 4127                    |                         |               |               |               |               |                 |                 |                 |                 |                 |                 |                 |                 |                 |                  |                  |                  |                  |                  |                  |                  |                  |                  |  |  |  |
| 1-OLEOYL-RAC-GLYCEROL (CAS# 111-03-5); (M+H)+                                                   |                         |                         |                         |                         |                         |                         |               |               |               |               |                 |                 |                 |                 |                 |                 |                 |                 |                 |                  |                  |                  |                  |                  |                  |                  |                  |                  |  |  |  |
| 1-OLEOYL-RAC-GLYCEROL (CAS# 111-03-5); (M+H)+[H2O]                                              |                         |                         |                         |                         |                         |                         |               |               |               |               |                 |                 |                 |                 |                 |                 |                 |                 |                 |                  |                  |                  |                  |                  |                  |                  |                  |                  |  |  |  |
| 1-OLEOYL-RAC-GLYCEROL (CAS# 111-03-5); (M+Na)+                                                  | 180138                  | 175693                  | 167616                  | 35378                   | 169450                  | 31308                   | 240166        | 231331        | 109208        |               |                 |                 |                 |                 |                 |                 |                 |                 |                 |                  |                  |                  |                  |                  |                  |                  |                  |                  |  |  |  |
| 1-PHENYLETHANOL (CAS# 1445-91-6); (M+H)+[H2O]                                                   |                         |                         |                         |                         |                         |                         |               |               |               |               |                 |                 |                 |                 |                 |                 |                 |                 |                 |                  |                  |                  |                  |                  |                  |                  |                  |                  |  |  |  |
| 2-(DIPHENYLMETHOXY)-N-METHYLETHYLAMINE (CAS# 17471-10-2); (M+H)+                                |                         |                         |                         |                         |                         |                         |               |               |               |               |                 |                 |                 |                 |                 |                 |                 |                 |                 |                  |                  |                  |                  |                  |                  |                  |                  |                  |  |  |  |
| 2',3'-CYCLIC CMP (CAS# 0); (M+H)+                                                               |                         |                         |                         |                         |                         |                         |               |               |               |               |                 |                 |                 |                 |                 |                 |                 |                 |                 |                  |                  |                  |                  |                  |                  |                  |                  |                  |  |  |  |
| 2,4-DIHYDROXYPTERIDINE (CAS# 487-21-8); (M+Na)+                                                 |                         |                         |                         |                         |                         |                         |               |               |               |               |                 |                 |                 |                 |                 |                 |                 |                 |                 |                  |                  |                  |                  |                  |                  |                  |                  |                  |  |  |  |
| 20:0 LYSO PC (CAS# 108341-80-6); (M+Na)+                                                        | 28880                   | 29828                   | 49794                   |                         | 25069                   |                         |               |               |               |               |                 |                 |                 |                 |                 |                 |                 |                 |                 |                  |                  |                  |                  |                  |                  |                  |                  |                  |  |  |  |
| 24:0 SM (D18:1/24:0) (CAS# 60037-60-7); (M+Na)+                                                 |                         |                         |                         |                         |                         |                         |               |               |               |               |                 |                 |                 |                 |                 |                 |                 |                 |                 |                  |                  |                  |                  |                  |                  |                  |                  |                  |  |  |  |
| 25-HYDROXYCHOLESTEROL (CAS# 2140-46-7); (M+H)+[H2O]                                             |                         |                         |                         |                         |                         |                         |               |               |               |               |                 |                 |                 |                 |                 |                 |                 |                 |                 |                  |                  |                  |                  |                  |                  |                  |                  |                  |  |  |  |
| 25-HYDROXYCHOLESTEROL (CAS# 2140-46-7); (M+Na)+                                                 |                         |                         |                         |                         |                         |                         |               |               |               |               |                 |                 |                 |                 |                 |                 |                 |                 |                 |                  |                  |                  |                  |                  |                  |                  |                  |                  |  |  |  |
| 2-AMINOBUTANOATE (CAS# 2623-91-8); (M+H)+                                                       | 2917                    | 3837                    | 5623                    | 6133                    | 6010                    | 7471                    |               |               |               |               |                 |                 |                 |                 |                 |                 |                 |                 |                 |                  |                  |                  |                  |                  |                  |                  |                  |                  |  |  |  |
| 2-AMINOETHYL DIHYDROGEN PHOSPHATE (CAS# 1071-23-4); (M+H)+                                      |                         |                         |                         |                         |                         |                         |               |               |               |               |                 |                 |                 |                 |                 |                 |                 |                 |                 |                  |                  |                  |                  |                  |                  |                  |                  |                  |  |  |  |
| 2'-DEOXYCYTIDINE 5'-MONOPHOSPHATE (CAS# 1032-65-1); (M+H)+                                      |                         |                         |                         |                         |                         |                         |               |               |               |               |                 |                 |                 |                 |                 |                 |                 |                 |                 |                  |                  |                  |                  |                  |                  |                  |                  |                  |  |  |  |
| 2-DEOXY-D-GLUCOSE (CAS# 154-17-6); (M+Na)+                                                      |                         |                         |                         |                         |                         |                         |               |               |               |               |                 |                 |                 |                 |                 |                 |                 |                 |                 |                  |                  |                  |                  |                  |                  |                  |                  |                  |  |  |  |
| 2'-DEOXYINOSINE (CAS# 890-38-0); (2M+Na)+                                                       |                         |                         |                         |                         |                         |                         |               |               |               |               |                 |                 |                 |                 |                 |                 |                 |                 |                 |                  |                  |                  |                  |                  |                  |                  |                  |                  |  |  |  |
| 2'-DEOXYINOSINE (CAS# 890-38-0); (M+Na)+                                                        |                         |                         |                         |                         |                         |                         |               |               |               |               |                 |                 |                 |                 |                 |                 |                 |                 |                 |                  |                  |                  |                  |                  |                  |                  |                  |                  |  |  |  |
| 2-HYDROXY-3-METHYLBUTYRIC ACID (CAS# 4026-18-0); (M+Na)+                                        | 54573                   |                         |                         |                         |                         |                         |               |               |               |               |                 |                 |                 |                 |                 |                 |                 |                 |                 |                  |                  |                  |                  |                  |                  |                  |                  |                  |  |  |  |
| 2-HYDROXY-4-(METHYLTHIO)BUTYRIC ACID (CAS# 583-91-5); (M+H)+[H2O]                               |                         |                         |                         |                         |                         |                         |               |               |               |               |                 |                 |                 |                 |                 |                 |                 |                 |                 |                  |                  |                  |                  |                  |                  |                  |                  |                  |  |  |  |
| 2-HYDROXY-4-(METHYLTHIO)BUTYRIC ACID (CAS# 583-91-5); (M+Na)+                                   |                         |                         |                         |                         |                         |                         |               |               |               |               |                 |                 |                 |                 |                 |                 |                 |                 |                 |                  |                  |                  |                  |                  |                  |                  |                  |                  |  |  |  |
| 2-HYDROXYBUTYRATE (CAS# ); (M+Na)+                                                              | 40851                   | 41090                   | 43389                   | 43351                   | 45146                   | 40736                   |               |               |               |               |                 |                 |                 |                 |                 |                 |                 |                 |                 |                  |                  |                  |                  |                  |                  |                  |                  |                  |  |  |  |
| 2-METHYLGLUTARIC ACID (CAS# 18069-17-5); (M+H)+[H2O]                                            |                         |                         |                         |                         |                         |                         |               |               |               |               |                 |                 |                 |                 |                 |                 |                 |                 |                 |                  |                  |                  |                  |                  |                  |                  |                  |                  |  |  |  |
| 2-METHYLGLUTARIC ACID (CAS# 18069-17-5); (M+Na)+                                                |                         |                         |                         |                         |                         |                         |               |               |               |               |                 |                 |                 |                 |                 |                 |                 |                 |                 |                  |                  |                  |                  |                  |                  |                  |                  |                  |  |  |  |
| 2-METHYLPROPANAL OXIME (CAS# 151-00-8); (M+H)+[H2O]                                             | 141412                  | 162624                  | 4600                    | 82085                   | 154790                  | 2695                    |               |               |               |               |                 |                 |                 |                 |                 |                 |                 |                 |                 |                  |                  |                  |                  |                  |                  |                  |                  |                  |  |  |  |
| 3-(4-HYDROXYPHENYL)LACTATE (CAS# 6482-98-0); (M+H)+                                             | 9064                    | 11984                   | 10410                   | 10456                   | 8436                    | 10700                   |               |               |               |               |                 |                 |                 |                 |                 |                 |                 |                 |                 |                  |                  |                  |                  |                  |                  |                  |                  |                  |  |  |  |
| 3-(4-HYDROXYPHENYL)LACTATE (CAS# 6482-98-0); (M+Na)+                                            | 28233                   | 28757                   | 26591                   | 30951                   | 27763                   | 26732                   |               |               |               |               |                 |                 |                 |                 |                 |                 |                 |                 |                 |                  |                  |                  |                  |                  |                  |                  |                  |                  |  |  |  |
| 3,3'-DITHIOVALINE (PENICILLAMINE SS DIMER) (CAS# 20902-45-8); (M+H)+                            |                         |                         |                         |                         |                         |                         |               |               |               |               |                 |                 |                 |                 |                 |                 |                 |                 |                 |                  |                  |                  |                  |                  |                  |                  |                  |                  |  |  |  |







| Compound                                            | Component 1 (23.82%) | Component 2 (12.43%) | Component 3 (8.52%) | Component 4 (6.71%) |
|-----------------------------------------------------|----------------------|----------------------|---------------------|---------------------|
| C17 H10 N10 O3                                      | -1.8110192           | 0.7861337            | 1.9194349           | 0.58030605          |
| C22 H49 N5 O3 P2 S2                                 | -2.6638293           | 1.7023263            | -0.47409153         | 0.3951305           |
| PROLINE (CAS# 147-85-3); (M+H)+                     | 1.5461737            | 1.2256405            | -1.606269           | -0.32374325         |
| C15 H36 N8 O7                                       | 0.030021474          | -0.04865852          | -0.24292046         | 0.9486955           |
| C25 H29 N3                                          | 0.4297526            | 0.4352222            | -1.3420265          | 1.2718039           |
| C26 H26 N10 S                                       | 0.6824951            | -0.8423137           | -1.537645           | 2.801491            |
| GIBBERELLIC ACID [ISTD] (CAS# 77-06-5); (M+Na)+     | -1.4155821           | -3.4872868           | -1.1676011          | 0.3857476           |
| C22 H36 N6 O11                                      | -1.9609218           | -0.23847057          | -1.5264182          | -0.07132915         |
| C7 H8 O                                             | -2.4644833           | -1.1968178           | 1.1872263           | -1.7965921          |
| C4 H14 N2 P2 S                                      | -0.39388472          | -2.6071248           | -0.9278337          | -0.60992527         |
| C22 H41 N3 O6                                       | 0.9510055            | 1.2147033            | -0.35062182         | 1.1829151           |
| C13 H30 N8 O S2                                     | -1.2823722           | -0.84280276          | -0.76720685         | 0.6288872           |
| C26 H48 N3 O11 P                                    | -3.0007622           | 1.9824305            | 1.1690322           | -0.106442854        |
| C44 H41 N O3 S2                                     | -2.5529857           | -0.68545777          | 0.011455998         | 0.1466165           |
| C23 H25 N3                                          | 0.82194006           | 0.9446682            | -0.48041186         | 0.9904418           |
| C22 H44 N2 P2                                       | -2.2916527           | -0.1927312           | 1.8713794           | 1.9100627           |
| C18 H33 O P3                                        | 0.51306915           | -2.9044178           | -0.66216534         | 1.2006066           |
| C4 H9 N S                                           | -0.08192217          | 1.7332279            | -0.80622786         | 0.068882585         |
| GUANOSINE (CAS# 118-00-3); (M+H)+                   | -1.2382023           | 1.1255282            | 0.3809381           | -0.5463847          |
| C16 H33 N O                                         | -1.6909117           | -0.46898982          | -2.2381592          | 0.25658423          |
| C16 H24 O4 S                                        | 1.2576525            | 1.5295047            | -1.0450273          | 1.5487266           |
| C17 H22 Cl N3 O3 P2 S2                              | -1.5164626           | -0.7786907           | 2.781347            | 0.21699974          |
| C15 H35 N7 O                                        | -2.0265143           | -0.16898553          | 0.7455468           | -0.7502855          |
| C28 H43 N O8 S2                                     | -2.2495723           | -1.7589899           | 2.123714            | 0.27056715          |
| C23 H41 N7 O2                                       | 0.14805102           | 1.14441              | -2.4623098          | 0.90637463          |
| C28 H57 N4 O3 P S                                   | -3.266388            | 1.0389394            | 1.2862134           | 1.3088032           |
| C12 H21 N4 O3 P                                     | -2.2541168           | -1.7985982           | -0.2408275          | 0.34161794          |
| C15 H22 S2                                          | -2.8952246           | -2.221283            | 1.3586001           | -0.80099213         |
| C41 H45 N3 O3 S                                     | -0.4897147           | 0.89593077           | -1.8331461          | 0.60409623          |
| C30 H64 N O2 P5 S3                                  | -1.1910554           | 0.7458955            | 1.8579415           | 0.063218005         |
| C18 H31 N7                                          | -0.96965015          | -0.3082778           | 1.09371             | 1.3356507           |
| C24 H33 N3 O2                                       | -3.0455503           | 0.3333711            | 1.2400312           | -1.9823217          |
| C18 H22 N4 O                                        | -1.0998708           | -0.9801987           | 1.2725432           | 0.8943161           |
| C29 H64 N12 O3 S2                                   | -3.36718             | 0.74886703           | 0.41376477          | 1.4529076           |
| C12 H17 N5                                          | -0.61754954          | 1.5389912            | -1.823723           | 0.71186006          |
| C25 H48 N2 O3 S                                     | -1.885852            | -0.08919026          | 1.1418288           | 0.70024145          |
| C7 H14 N6 O2                                        | 0.04723926           | -0.7725452           | -1.3154808          | 1.538207            |
| TAURINE (CAS# 107-35-7); (M+Na)+                    | 2.7394686            | 0.689175             | -0.90353596         | 1.2402995           |
| MYO-INOSITOL (CAS# 87-89-8); (M+Na)+                | 0.654366             | 0.2164067            | -0.022376895        | 0.06789872          |
| C38 H35 N6 O5 P                                     | -2.30281             | -1.1333663           | 0.31780237          | -2.204831           |
| C24 H50 N2 O2 P2 S                                  | -0.19141752          | 0.31640458           | -2.4619372          | -0.23466586         |
| 4-HYDROXYBENZALDEHYDE (CAS# 123-08-0); (M+H)+       | -1.5554693           | -1.5842661           | 0.31342906          | 0.4268636           |
| C28 H44 N4 O7 S                                     | -0.84486014          | -3.7732503           | -0.8158323          | 0.43745494          |
| C41 H50 N4 O S2                                     | 2.1632419            | 0.26030955           | 0.45482844          | -0.89646804         |
| C12 H18 N2 S3                                       | -2.2167416           | -0.8472885           | 1.1870003           | -0.06760684         |
| TRICARBALLYLIC ACID (CAS# 99-14-9); (M+H)+[H2O]     | -2.3224525           | 0.62762636           | -0.18938357         | 1.3116117           |
| C8 H17 N O2                                         | -1.8927789           | 1.0182205            | -0.9106842          | 1.0758228           |
| C24 H19 N12 O4 P                                    | -1.6184932           | -0.14214608          | 0.020974783         | 0.06133406          |
| C26 H23 N6 O3 P                                     | -2.7459729           | -1.5730429           | -0.5418917          | -1.1211721          |
| C13 H25 O P S                                       | -1.1311178           | 0.81015587           | -0.6123555          | -1.4264674          |
| C25 H38 S                                           | -0.12846988          | -1.7339305           | 2.463483            | 1.3381757           |
| C19 H43 N3 O5                                       | -3.0220273           | 0.67651784           | 1.1120775           | 0.79487425          |
| GLUCOSE (CAS# 50-99-7); (M+Na)+                     | -0.001271532         | 1.547341             | 0.0521734           | -0.012799507        |
| C23 H53 N5 O P2 S2                                  | -3.0138788           | 1.8746523            | 0.6142985           | 0.043679506         |
| N-ALPHA-ACETYL-L-LYSINE (CAS# 1946-82-3); (M+H)+    | -0.015916223         | -0.02796764          | -0.40819594         | 1.6707612           |
| C17 H19 N O3                                        | -0.9127244           | -0.33957005          | -0.7385104          | -0.42057478         |
| LAUROYL-CARNITINE (CAS# 25518-54-1); (M+H)+         | -2.7716444           | -0.25842315          | -0.6343872          | 0.12542051          |
| C14 H31 N O                                         | 0.22648849           | -1.2894652           | -1.2561339          | -0.7130051          |
| C19 H20 N10                                         | -0.41540715          | -1.6286497           | 0.75168777          | 0.4588017           |
| C22 H24 N8 O P4                                     | -2.1008692           | -0.8336065           | 2.0023148           | 0.07633144          |
| C14 H20 N2 O2                                       | -3.030766            | -0.2538384           | 1.5594546           | -1.0590303          |
| C31 H66 N8 O S3                                     | -2.254258            | 0.1958552            | -1.193163           | -0.61126274         |
| C22 H50 N7 P S3                                     | -2.0082614           | 0.05124879           | -0.35185117         | 1.0198436           |
| THROMBOXANE B2 (CAS# 54397-85-2); (M+H)+[H2O]       | -0.29975468          | 1.0485346            | 0.4947127           | 0.49457735          |
| C29 H46 N2 O2 S2                                    | 0.42273664           | -1.3132164           | 0.33037204          | 1.6874317           |
| C20 H40 N6 O10                                      | -4.0140123           | -0.3338561           | -0.14895475         | -0.22072428         |
| OXIDIZED GLUTATHIONE (CAS# 27025-41-8); (M+H)+      | -0.5793206           | -0.05154653          | -0.95783395         | -1.8208103          |
| C22 H48 N2 O S3                                     | -0.33079976          | -0.17139511          | 1.5475966           | 1.0310913           |
| C16 H29 N4 P3                                       | -3.1109798           | 1.1744331            | -0.83983964         | -0.24933541         |
| C36 H56 N6 O3 S                                     | -0.7496492           | -1.1942801           | 0.019276388         | -1.8386773          |
| C20 H32 N12                                         | -0.61831236          | 0.48122352           | -0.32457703         | 0.119059086         |
| DEOXYCORTICOSTERONE ACETATE (CAS# 56-47-3); (M+Na)+ | -0.54320145          | -0.67997056          | -0.67900586         | 0.29179448          |
| C26 H33 O6 P S                                      | -3.130391            | -1.7117157           | -0.30382884         | -1.0376647          |
| SPERMIDINE (CAS# 124-20-9); (M+H)+                  | -2.592518            | 0.33635157           | 0.43699178          | 2.5060382           |
| C8 H10 O6                                           | 0.6981336            | -0.026660219         | -0.96410215         | -0.920998           |
| C38 H62 O S2                                        | -1.3646892           | 0.022837713          | 0.73524064          | 0.048461035         |
| C16 H31 N7 O                                        | -0.34119427          | 0.18319727           | 1.6903077           | 0.2131108           |
| C16 H31 N2 O4 P3                                    | -3.8821588           | -0.6767182           | 0.43313837          | -0.2442143          |
| C42 H44 N O4 P3                                     | -2.5773184           | 0.30687386           | -0.32623687         | -0.23521051         |
| C40 H59 Cl N5 O3 P                                  | -0.37003624          | 2.3017497            | -1.1966269          | 0.6571088           |
| C18 H26 N6 O                                        | -1.5491207           | -0.21390632          | -0.81100196         | 0.95189714          |
| C16 H32 O2 P2                                       | -1.5708963           | -0.6448884           | -0.45727867         | 2.479775            |
| C14 H9 N4 O P S2                                    | -3.244692            | 1.5651591            | 0.4714679           | 0.41928625          |
| C20 H37 N4 O3 P                                     | -0.96882164          | -0.49063703          | 0.16157795          | 1.8097152           |
| C8 H4 N4 O3 S                                       | -1.606489            | 1.0161108            | 1.4541523           | -1.881242           |
| C22 H39 N4 O4 P3                                    | -1.8356285           | -0.8602085           | -0.44783336         | -0.4848067          |
| C28 H19 N8 P3                                       | -2.7385006           | -2.6528292           | 0.65479803          | -0.76081717         |
| C7 H14 N2 O                                         | -3.0826845           | 0.3552745            | 0.37687132          | -1.3347032          |
| C38 H57 N O3 P2                                     | -0.6651954           | -3.127215            | -1.4126284          | 0.3911884           |
| C6 H12 N4 O4                                        | -2.4300582           | -0.6518424           | -0.04960506         | 0.7893544           |
| C13 H23 N4 O3 P                                     | 3.0713246            | -0.43308932          | 1.4376446           | -0.3967173          |
| C26 H31 N2 O3 P                                     | -3.0293875           | -0.055663645         | -1.9037333          | 0.14251241          |
| C33 H50 N O10 P S2                                  | -1.44333             | 0.7498543            | 1.6593784           | -0.7201575          |
| XANTHINE (CAS# 69-89-6); (M+H)+                     | -0.74701273          | 2.9741054            | -1.3644147          | 0.7518645           |
| C25 H47 N O4                                        | -1.8143421           | 3.492704             | -0.8614134          | 0.19416009          |
| C24 H46 N3 O11 P                                    | -1.6870466           | 3.3043547            | -0.546248           | 0.12997808          |
| THREONINE (CAS# 72-19-5); (M+H)+[H2O]               | 0.1892515            | 0.87379897           | 0.38805324          | -0.7359475          |
| C35 H62 N7 O4 P S2                                  | -1.0092036           | 0.14086005           | 2.800027            | 0.35012192          |
| C12 H10 N6 O2                                       | -3.888624            | 0.59151286           | 0.8838733           | -0.9932523          |
| ETHYLMALONIC ACID (CAS# 601-75-2); (M+Na)+          | -0.78258574          | -0.49367204          | 0.21291262          | -0.13000944         |
| C32 H45 P3                                          | -2.3083754           | -1.5429554           | -0.25483906         | -1.3590018          |
| C16 H26 N2 S3                                       | -1.5683964           | -1.0607796           | -0.45312935         | 1.1837602           |
| C15 H30 N6 O2                                       | 0.014421865          | -2.9275486           | -0.83081675         | 1.5219032           |
| C27 H50 N O2 P S2                                   | -0.8677006           | 1.6469728            | -1.7129443          | 0.7054461           |
| C3 H12 N4 O4                                        | 0.16100293           | 0.02755645           | -0.17708081         | -2.6694257          |
| C14 H33 N4 P3                                       | -2.516133            | -0.49042457          | -1.5677638          | -1.037795           |
| C17 H40 N8 O8                                       | -1.2981651           | -1.1543643           | 1.0587137           | 1.263429            |
| C43 H85 P                                           | 0.18858445           | 1.8356044            | -0.005602211        | -0.56479            |
| C24 H30 O6                                          | -2.7043667           | -1.7350681           | -0.5390655          | -1.2536925          |
| C18 H24 O8 P2                                       | -1.3930186           | -3.3822794           | -1.2232151          | 0.4827523           |
| C28 H41 N5 S                                        | -2.2007232           | 1.2359959            | 0.93230975          | 0.043127865         |
| C27 H54 N2 S3                                       | -2.1286583           | 1.6021094            | 0.45655394          | -0.37128454         |
| C29 H47 O3 P S3                                     | -1.8777238           | -1.9204859           | 1.5567329           | 0.3370874           |
| C37 H51 O3 P S2                                     | -1.253616            | -3.7160714           | -0.6393652          | 0.25012988          |
| C7 H3 N O6 S                                        | -2.6941957           | -0.5108939           | 1.0252237           | -0.007244095        |
| C33 H44 N O6 P                                      | 0.22941677           | 1.0258303            | -2.1793153          | 0.24175638          |
| C22 H42 N2 O3 S                                     | -0.043815292         | -3.4121687           | 0.77167416          | 1.5548468           |
| C10 H11 N5                                          | -0.960321            | -3.853217            | -0.5808439          | 0.42435938          |
| C15 H35 N2 O6 P S2                                  | -1.7231547           | -0.34270155          | 1.0050409           | -0.015969729        |
| C16 H35 N O                                         | -2.4720356           | 0.31064928           | 0.60955375          | -0.25165737         |
| C18 H40 N5 P                                        | -1.1715808           | 0.9735458            | -0.70693105         | 1.8354924           |
| C16 H25 P3                                          | -1.3719358           | -0.42861283          | -0.06024237         | -1.469666           |
| C20 H37 N7                                          | -3.1941073           | -0.37520754          | 1.2295494           | 1.663382            |
| ELAIDIC ACID (CAS# 112-79-8); (M+Na)+               | 0.09923578           | -0.003800951         | -0.6592643          | 0.9269416           |
| C26 H35 O4 P3                                       | 0.8187348            | 0.102336615          | 1.1958869           | 0.07019805          |
| C30 H63 N8 O P S2                                   | -2.7484014           | -0.7432753           | 0.6372396           | 1.012951            |
| C22 H24 N6 O4                                       | -2.8268127           | -0.8996017           | -1.791262           | 0.18380857          |
| C36 H74 N4                                          | -0.050408833         | -0.6222052           | -0.7763956          | -1.8530756          |

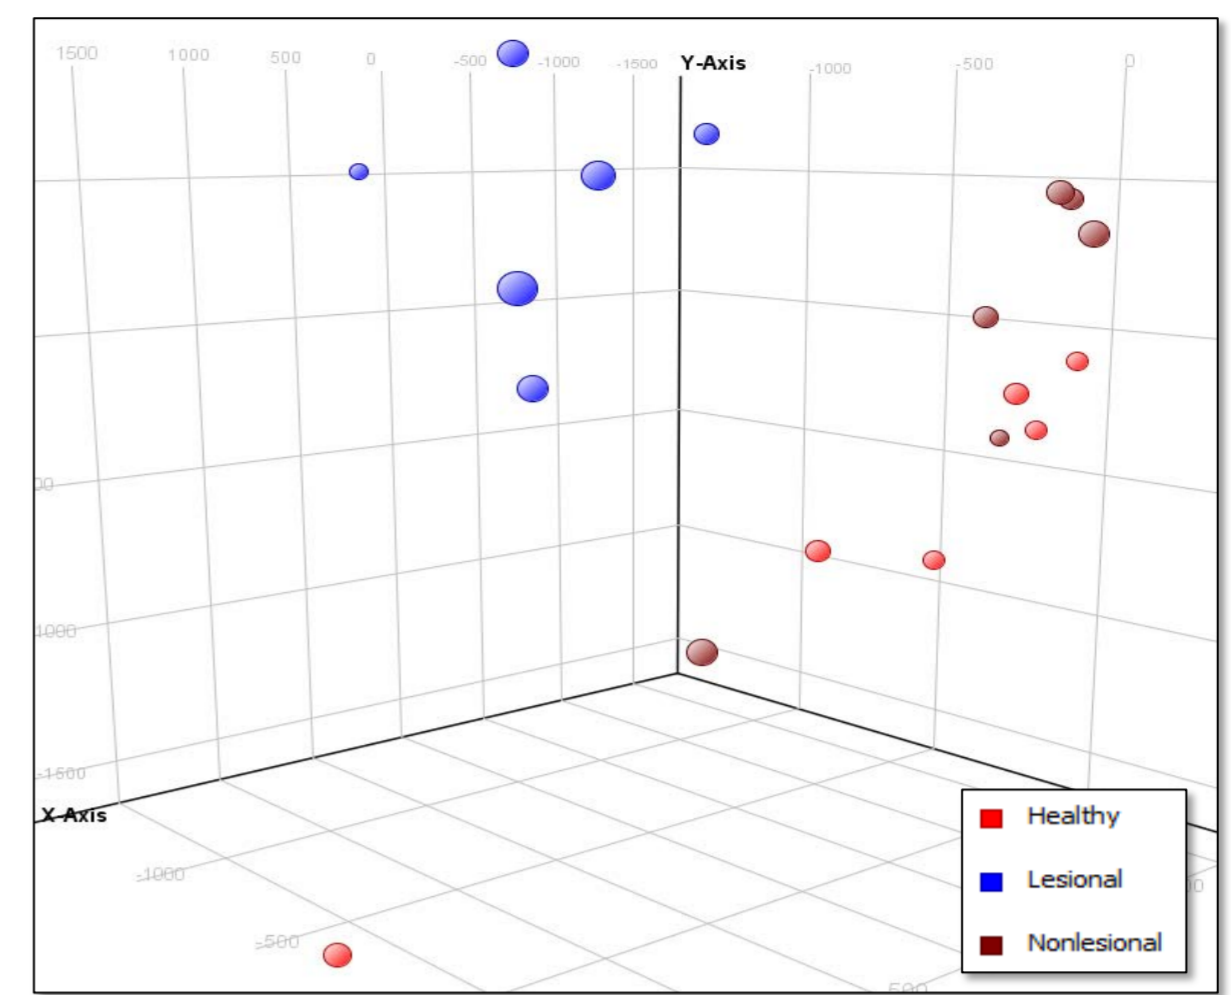

|                                                     |              |              |              |              |
|-----------------------------------------------------|--------------|--------------|--------------|--------------|
| C3 H9 N3 O2                                         | -0.6129747   | -0.8282217   | -1.0129027   | 0.11748785   |
| RIBOFLAVIN (CAS# 83-88-5); (M+Na)+                  | -1.4348856   | -1.0805701   | 2.237447     | -1.514881    |
| C18 H39 N O                                         | -2.2043471   | -0.1264525   | 0.5492704    | -0.8182727   |
| C15 H28 N6 O                                        | -0.035653055 | 0.5333473    | -1.2336273   | -0.92974555  |
| C9 H7 N O                                           | -2.461869    | -0.1991852   | -0.91401863  | -0.923063    |
| C21 H37 N8 P3                                       | -2.9402735   | 0.7600409    | -1.6375077   | 0.5269356    |
| C14 H12 N6                                          | -0.8146719   | 0.14573279   | -0.41921398  | 1.7042925    |
| C18 H43 Cl2 N13                                     | -1.7713125   | 0.77618295   | -0.33318937  | 0.5551579    |
| C38 H43 N O S                                       | -1.2041482   | 2.1571612    | -1.5114666   | 0.087273136  |
| C23 H47 N O4                                        | -0.83816     | 2.0152125    | -0.08318332  | 2.1441298    |
| C6 H12 N6 O3                                        | -3.525665    | -0.4974774   | -1.3877429   | -0.27024162  |
| C24 H33 N O6                                        | -2.1051772   | -2.2312462   | 1.3420029    | 0.52924573   |
| C27 H51 O2 P3                                       | 1.7600093    | -2.801207    | -0.4842854   | 0.118399434  |
| C25 H35 N O6                                        | -1.8518777   | -1.9378976   | -0.3200803   | -1.5709543   |
| C16 H30 O2                                          | -1.4322007   | -0.76784414  | 2.4000301    | 1.4512357    |
| C31 H47 N4 O P5                                     | 0.33760104   | 1.4758443    | -0.20582466  | 1.6222947    |
| C32 H64 N O2 P5 S3                                  | -2.590787    | -0.34134564  | 0.11569515   | -0.71527696  |
| C38 H46 O12 S                                       | 2.2574935    | 1.5927544    | -0.8181315   | -0.5598436   |
| C16 H38 N6 O2 S                                     | -2.3950763   | 2.5482414    | -1.7065572   | -0.2533914   |
| C27 H41 N9 O12 S                                    | -1.6215476   | -0.5526788   | 0.7157018    | -1.0854635   |
| C33 H46 N10 P2                                      | -1.7369746   | 0.06736314   | -0.17072213  | 0.5322056    |
| C42 H87 O P                                         | 0.9967271    | -0.9399774   | -1.3187528   | -0.8810526   |
| CAFFEINE (CAS# 58-08-2); (M+H)+                     | -2.020741    | -0.3900073   | -0.066599935 | 0.52173495   |
| C22 H46 N6 S2                                       | -0.5791972   | -0.95956373  | 0.27005416   | 1.6531515    |
| C33 H47 N5 O5 S2                                    | -1.4017001   | 0.6601058    | 0.118363395  | 0.31675428   |
| C16 H33 N4 O3 P                                     | -0.8489454   | -0.19188544  | -2.9457715   | -0.68692786  |
| C11 H29 N6 P S2                                     | -1.7081144   | 0.55415666   | -0.51959956  | -0.91614646  |
| C10 H18 N2 O5                                       | -0.9591618   | 0.2588809    | -1.1809723   | -1.3641424   |
| C4 H11 O3 P                                         | -1.7090849   | -0.38792142  | 1.3731614    | 0.038580764  |
| C21 H43 N5 O10 S                                    | -2.4585555   | 2.9583356    | -0.122428924 | 0.49939185   |
| C18 H43 N7                                          | -2.549827    | -1.6567835   | 1.7297195    | -0.3452018   |
| 3-HYDROXYPHENYLACETATE (CAS# 621-37-4); (M+H)+      | -2.6201513   | 0.38920516   | 1.5030679    | -1.5957241   |
| C7 H12 O4 P2                                        | -2.7614117   | 1.5740829    | 1.0684202    | -0.95909876  |
| C33 H57 N O4 S4                                     | 0.046093196  | 0.37339106   | -0.13284284  | 1.1320927    |
| C13 H13 N9 O                                        | 0.012458891  | 2.0376399    | -1.7950423   | 0.75195634   |
| C34 H73 N2 O2 P5 S                                  | -1.213471    | -0.64136916  | 0.32017845   | 0.1569298    |
| C10 H14 O                                           | -1.7902223   | -3.4154239   | -0.3419975   | 0.24331696   |
| C32 H70 N2 O10 S2                                   | -2.0816286   | -0.7875426   | 0.47030407   | 0.15178882   |
| C20 H36 O4                                          | -2.2776933   | 1.646414     | -0.013751239 | 1.0563571    |
| C18 H40 N2 O2 S2                                    | -1.3946412   | 1.0868418    | -2.2737768   | 0.709316     |
| C27 H48 N3 O13 P                                    | -2.2516942   | 1.17626      | 0.29786807   | -1.6432809   |
| C9 H8 N6 O2                                         | -2.8789682   | 0.021343503  | -2.0146418   | -1.218037    |
| C36 H52 N3 O3 P S3                                  | -1.603536    | 0.6070125    | 1.0983881    | 1.1856382    |
| C27 H34 N2 O P2                                     | -1.0469767   | -3.6677184   | -1.2199157   | 0.54493666   |
| C30 H41 N6 O3 P                                     | -0.84655255  | -3.8144474   | -0.9967992   | 0.45892662   |
| C27 H51 N3 O6 S                                     | -1.4837523   | 1.4656483    | 1.0436583    | 0.4379838    |
| C31 H43 Cl2 N                                       | -2.7845397   | 0.11141145   | -0.06447366  | -0.25444734  |
| C26 H48 N O7 P                                      | -3.2085686   | 1.9461291    | 0.74841946   | -0.2530142   |
| C24 H52 N2 P2 S                                     | -1.2340915   | -3.4305565   | -0.72461873  | 0.2830431    |
| C25 H47 N3 O S3                                     | -2.8539422   | -0.005094439 | -0.16616595  | -0.32378817  |
| C16 H20 N2 O3                                       | -2.956608    | -1.332033    | -0.89204717  | -0.46277907  |
| C7 H18 Cl N5 O                                      | -1.4234776   | 0.6693722    | -0.17108908  | -0.10357334  |
| C7 H4 O2                                            | -2.9793098   | 1.1195394    | 1.0937942    | -0.965667    |
| C22 H8 N2 O3                                        | -0.5598179   | 1.251503     | -1.644833    | 1.8216293    |
| C4 H8 N6 O2                                         | -3.1785717   | -0.3139683   | -1.602894    | -0.02822563  |
| C16 H33 N O3                                        | -1.9028535   | 1.9528356    | 0.9249439    | 0.07114661   |
| C16 H33 N O2                                        | -1.3420157   | -1.0587993   | -1.1260084   | 0.8251769    |
| C26 H26 N2 O3 P2                                    | -2.1427462   | -1.3628907   | -0.4285949   | -0.34937462  |
| C6 H12 N6 O                                         | 0.090699136  | -1.6242691   | -0.338017    | 1.115976     |
| C10 H20 N2 O3                                       | -2.079581    | 2.6463537    | -0.40932003  | -0.5606792   |
| C32 H63 O3 P S2                                     | 1.3189942    | -0.554193    | -0.39574474  | 2.2601066    |
| C27 H36 N10                                         | -0.73991287  | -0.4727239   | -0.9803268   | 2.0202143    |
| ZEATIN [STD] (CAS# 13114-27-7); (M+H)+              | -0.41960472  | -3.9008493   | -0.91059935  | 0.42690715   |
| C11 H20 N6 O3                                       | 0.037064627  | -0.032357395 | 0.21818477   | 0.14329195   |
| C18 H46 N7 O2 P S2                                  | 0.94115394   | 1.2150999    | -1.721572    | 1.318211     |
| C10 H13 N P2 S2                                     | -2.5137856   | 1.693509     | 0.46958476   | -0.63968635  |
| C8 H14 N6 O                                         | -0.86626863  | 1.3647116    | 0.83859915   | 1.2097605    |
| RAC-GLYCEROL 1-MYRISTATE (CAS# 75685-84-6); (M+Na)+ | 0.5095395    | 0.008328799  | -3.3250427   | 0.09685048   |
| C24 H48 N O7 P                                      | -1.4321856   | 0.5025517    | 0.52108395   | 0.5768461    |
| C19 H25 N5                                          | -2.5213764   | -1.8891839   | 0.06092664   | 0.20766598   |
| OXIDIZED GLUTATHIONE (CAS# 27025-41-8); (M+2H)+2    | -0.42786938  | 0.7958617    | -1.8007054   | -1.1201842   |
| C16 H32 N6 O2                                       | -2.194741    | 1.5481482    | 0.14208099   | 0.9357928    |
| C18 H41 N7                                          | -1.6931152   | -0.2997868   | -0.23282918  | 0.8580241    |
| C21 H36 O9 P2 S                                     | -2.7573092   | -1.0268861   | 0.041866183  | -1.6206478   |
| C31 H35 N5                                          | -2.7059038   | 0.50238115   | 0.1220738    | 0.33269346   |
| C31 H62 N O7 P5 S                                   | 0.5283102    | 1.5547525    | -1.3342835   | 0.67513543   |
| C13 H30 N2 O4 S                                     | -1.8544204   | 0.0945655    | -0.44874245  | -0.007353831 |
| C26 H35 N11                                         | -3.1854641   | -1.1297741   | -0.26931074  | -0.88401324  |
| C15 H20 N6 O                                        | 1.2167463    | -1.7266268   | 0.7271414    | -0.5364442   |
| C12 H5 Cl N6 O3 S                                   | -2.4226677   | -1.8386059   | 1.1605008    | -0.37583724  |
| C14 H28 N6 O                                        | -1.6839077   | 0.79706323   | 0.40107873   | -0.15951738  |
| C24 H5 O11 P5 S2                                    | -0.8694008   | 0.47392827   | -1.0217435   | -1.5961022   |
| C7 H8 N4 O2                                         | -2.9328523   | 0.69814265   | 0.76238894   | 0.22843519   |
| C15 H22 N2 O3                                       | -0.88740426  | 0.2871713    | -1.0460308   | -0.29992938  |
| C15 H22 O2                                          | -1.6132677   | -0.4111204   | 2.6990094    | -0.5880548   |
| C10 H18 O3 P2                                       | -1.6005579   | -3.527548    | -0.91915816  | 0.3972981    |
| C24 H50 N O8 P                                      | -2.0895953   | -1.7568185   | 0.38118082   | 0.17060885   |
| C34 H65 N4 O P S3                                   | -0.017082393 | -0.694564    | -0.5595753   | 0.6183233    |
| C7 H10 N6 O                                         | -3.0245047   | -1.078264    | 0.61050844   | 1.2767832    |
| C32 H61 N O4 P6 S                                   | -0.9604204   | -0.9556467   | -0.4941495   | -0.50464535  |
| C30 H53 N4 O2 P S                                   | -1.9158691   | -0.54559356  | -2.3650923   | 0.66469836   |
| C29 H42 N8 S2                                       | -2.486317    | -0.75823975  | -0.23349816  | 0.4360846    |
| C30 H40 S                                           | -1.7456176   | 1.1092402    | -1.6846038   | 1.4064023    |
| C38 H46 N2 O6 P2 S                                  | 2.062737     | 1.4378054    | -0.7512784   | -1.0049976   |
| C19 H24 O4                                          | 2.5838225    | -2.2435539   | 0.93881285   | -0.20717156  |
| C6 H8 O3 P2                                         | -2.2564778   | -0.025899082 | 0.9103808    | -0.93385637  |
| C25 H51 N2 O P S                                    | -3.493145    | 0.1389477    | 0.4203813    | 0.2306096    |
| C20 H42 O11                                         | -3.699928    | -0.40232652  | 0.006213367  | -0.30984336  |
| GAMMA-LINOLENIC ACID (CAS# 506-26-3); (M+Na)+       | -1.3317596   | -1.6304352   | 0.66926885   | 0.13086995   |
| C32 H44 O S                                         | -2.9816675   | 0.33904195   | -1.8699532   | 1.059677     |
| C26 H50 N O7 P                                      | -3.4308968   | 1.9321854    | 0.27183297   | -0.24671924  |
| C17 H38 N2 O2 S2                                    | -0.22962637  | -0.3433057   | 1.1665725    | 0.48234397   |
| 2'-DEOXYINOSINE (CAS# 890-38-0); (M+Na)+            | -0.32432556  | 1.2626354    | -1.0954539   | 1.0364583    |
| C20 H32 O3                                          | -2.585979    | -0.41184458  | -0.4268613   | 0.8642461    |
| C6 H13 Cl N6                                        | -3.1234236   | -1.1663479   | -0.024309129 | -1.7842351   |
| C13 H16 N6 O4                                       | -1.3213587   | -1.3351054   | -2.3703916   | -0.2749966   |
| C35 H45 N3 O2 P2                                    | -1.2410378   | 1.1592038    | -1.4614979   | 1.5625234    |
| C17 H32 N6 O2                                       | -1.376452    | 1.1789831    | -2.6448689   | -0.2944237   |
| C10 H26 N4                                          | -1.5182264   | -0.41845366  | 0.52488697   | 1.6498927    |
| C24 H50 O13                                         | -4.0064316   | -0.16102879  | -0.33294636  | -0.2676929   |
| C31 H27 N4 O P S3                                   | -2.9126465   | -0.72754425  | -0.25426883  | 0.29767448   |
| C10 H22 O6                                          | -3.645227    | -0.7319036   | -0.68109024  | -0.2886305   |
| C15 H13 N O2                                        | -1.8057715   | -1.1677386   | 1.1978132    | -0.5795674   |
| C26 H52 N2 O2 P2 S                                  | 0.9090315    | -3.5958297   | -0.46843985  | 0.072289646  |
| C48 H59 N3 S2                                       | -2.6745698   | 1.1814549    | 1.3348281    | 0.6285976    |
| C15 H27 N O4                                        | -2.7156      | -0.17937812  | 0.07835108   | 0.4403262    |
| QUINOLIN-2-OL (CAS# 59-31-4); (M+H)+                | -2.1579435   | -0.6558381   | -0.9901736   | 0.020036608  |
| C21 H41 N2 O3 P S                                   | -2.5779712   | 1.4219954    | -0.9266729   | 0.4961825    |
| C5 H13 N O                                          | -1.0544282   | 0.24704719   | 0.5984796    | 0.14049482   |
| C19 H38 N2 O3                                       | -2.671622    | 1.4031583    | -0.8666874   | 0.5918561    |
| C8 H9 N O                                           | 0.047961764  | -0.043207347 | -0.14805602  | 0.7161529    |
| C20 H28 O2 P2                                       | -3.0113032   | 0.104013234  | -1.8966099   | 0.47287536   |
| C14 H12 O4                                          | -1.1503232   | -1.5960568   | 0.7612329    | 0.49734432   |
| C14 H31 N4 O2 P                                     | -3.547164    | 0.26413003   | 0.63887286   | 1.0661994    |
| C24 H49 N2 O P S                                    | -2.5883193   | 0.94549686   | 0.18276913   | 0.6306132    |
| C6 H12 N6                                           | -0.5335025   | -1.9604905   | -0.2779467   | 1.476427     |
| C24 H49 N5 O6 P2                                    | -3.4486275   | 1.9756382    | -0.1736241   | -0.11213213  |
| C16 H18 O2 P2                                       | -0.08400455  | 1.7440577    | -1.8755966   | 0.7607584    |
| C12 H23 N O2                                        | -0.6314309   | 0.91588837   | 1.1339604    | 1.4837229    |

|                                                                  |             |              |              |              |
|------------------------------------------------------------------|-------------|--------------|--------------|--------------|
| C4 H4 N2 O2                                                      | -2.557703   | 2.038757     | 0.4305456    | 0.4452058    |
| C12 H23 N O3                                                     | -3.4442046  | 1.5991731    | 0.059304208  | 0.42961445   |
| C12 H23 N O4                                                     | 0.70305187  | 2.1393158    | -1.3441573   | -0.5952557   |
| C8 H14 N6 O2                                                     | -3.5553784  | 0.50920546   | -0.09929907  | 0.9343488    |
| C8 H14 N6 O3                                                     | -1.0559283  | 0.5302934    | 0.8484343    | 0.5620718    |
| C22 H27 N3 S                                                     | -2.8123558  | -1.7342755   | 0.656439     | -1.2831258   |
| C7 H20 N5 O2 P                                                   | -3.324263   | -0.67595875  | -0.8635602   | 0.7348014    |
| L-HISTIDINE (CAS# 71-00-1); (M+Na)+                              | -0.53454506 | -0.17396542  | -0.10731281  | -0.6736531   |
| C15-7,10,13,16-DOSCOTATETRAENOIC ACID (CAS# 28874-58-0); (M+Na)+ | -0.29517204 | 0.33230558   | -0.66266394  | 0.76793975   |
| C24 H50 N6 S2                                                    | -1.7227273  | 1.5252552    | -0.9723884   | 1.7086477    |
| C8 H16 N7 O P                                                    | -1.6012398  | 1.9312695    | 0.5291655    | -1.2125872   |
| STACHYOSE (CAS# 54261-98-2); (M+Na)+                             | -2.8203487  | -1.9802258   | 0.027828721  | -1.364197    |
| HYPOXANTHINE (CAS# 68-94-0); (M+H)+                              | -2.1064136  | 1.9689856    | -0.19064218  | 0.32878083   |
| C34 H48 O2 S                                                     | -1.528486   | 1.4962565    | -1.9073944   | 0.59773564   |
| C5 H5 N5                                                         | -1.3804045  | -3.6267197   | -0.9644028   | -0.047020346 |
| C28 H48 N3 O11 P                                                 | -3.0339074  | 1.8940784    | 0.75637305   | -0.81739104  |
| C32 H38 N10 O3 S2                                                | 2.51545     | 1.3395578    | -0.5538242   | -0.8526995   |
| C13 H18 N2 O                                                     | -3.4786198  | -0.67821586  | 1.7435861    | -0.28819364  |
| XANTHURENIC ACID (CAS# 59-00-7); (M+H)+                          | -1.6328268  | -0.976271    | 1.042801     | 0.40375108   |
| C31 H58 N2 P2 S2                                                 | -2.0942154  | 0.27427027   | 1.4297799    | 0.7547298    |
| C28 H57 N O5 P4                                                  | -0.9135726  | 2.6472225    | -0.0849804   | 0.019420117  |
| C30 H51 N O16                                                    | -0.6329665  | 0.4561404    | -0.079994254 | 0.17938891   |
| C39 H79 O P S4                                                   | 1.0750953   | 0.10105556   | 0.41198066   | 1.5111954    |
| C33 H54 N2 P2                                                    | -0.9571959  | 1.266038     | -0.6544272   | 1.8301767    |
| C23 H43 N8 O P                                                   | -1.1660886  | -2.2836988   | -0.18202838  | 0.25237307   |
| C36 H47 N3 O5 S3                                                 | -0.5269438  | 1.176951     | -0.43279833  | 1.3099062    |
| C12 H25 N3 O3                                                    | -1.3350897  | 2.8977523    | -0.7999803   | -0.3150881   |
| C16 H30 N6 O2                                                    | -2.1280298  | 1.8195024    | 0.95107293   | 0.276086     |
| C11 H12 N6 O2                                                    | -2.3427134  | -1.3397735   | -1.0902243   | -1.9119565   |
| C40 H61 N O4 P2                                                  | -0.3062867  | -3.121337    | -1.387301    | 0.7692593    |
| C17 H35 N O3                                                     | -3.269943   | 0.15952127   | 1.932386     | -0.5092676   |
| C26 H51 N4 O2 P S                                                | -2.5352912  | -0.8382777   | 1.6429727    | 0.7186745    |
| C37 H33 N10 P                                                    | -0.4730512  | 0.9261138    | 1.3750365    | -0.1388776   |
| C16 H36 N6 O2 S                                                  | -1.2617824  | -1.1202041   | 1.0794013    | 0.21711221   |
| C23 H20 N10                                                      | -1.6795253  | -0.5565544   | -2.6607964   | 0.16468744   |
| C17 H30 N6 O5                                                    | -1.8375367  | -0.27344692  | 0.1873396    | 1.1748016    |
| C16 H33 N4 O2 P3                                                 | -0.94302607 | 1.3992387    | -0.9948313   | -0.23837814  |
| C12 H24 N6                                                       | -0.9069268  | -0.24601977  | 0.46239105   | 2.092834     |
| C32 H40 O6 S                                                     | 0.42833224  | -0.05897829  | -2.6799235   | 2.113511     |
| C5 H9 N3                                                         | -2.879429   | 1.5302732    | -0.2361941   | -1.3665009   |
| C6 H6 O5                                                         | -2.68171    | -0.14731872  | 0.46873868   | 0.59034574   |
| C18 H43 N7 O                                                     | -3.1789649  | -1.5568995   | 0.053403318  | -0.6727695   |
| C20 H8 S2                                                        | -2.5126476  | 0.9158701    | 0.5204826    | -0.4695596   |
| C30 H44 N O2 P S2                                                | -1.6385255  | -0.065847546 | -0.01912731  | 1.2086604    |
| C35 H64 N6 S3                                                    | 0.37540707  | 1.3511277    | -0.602083    | 1.8560952    |
| C23 H45 Cl N4 O3                                                 | -0.567095   | -0.42438853  | -2.27869     | 0.029445956  |
| C24 H29 N2 P3 S                                                  | -3.037068   | -2.368517    | 0.8510951    | -0.515206    |
| C3 H10 N3 O2 P                                                   | -2.2562091  | -0.57704383  | 0.762924     | -0.041431665 |
| C12 H14 N6 O                                                     | 2.2686536   | -0.7397944   | 1.1746154    | -0.051007755 |
| C9 H14 N4 O2 S                                                   | -3.6308432  | 0.38013658   | 0.8106497    | 1.1666074    |
| C15 H27 Cl O S                                                   | -0.86584795 | 0.3482622    | 0.7862782    | 0.84950393   |
| C16 H28 N4 P2                                                    | -1.0857748  | 0.09530035   | -0.17126498  | -0.022718381 |
| C15 H18 N6 O                                                     | -2.1433852  | 0.022448301  | -0.95564127  | 0.9227145    |
| C13 H19 N3 O7 S                                                  | -1.1569183  | -0.24486014  | 0.018981874  | 0.30177385   |
| C25 H24 N8 P2                                                    | -2.488781   | -0.30593038  | -1.6154324   | 0.19768512   |
| C20 H19 N2 P                                                     | -1.1169033  | -0.2329594   | -1.3568861   | 0.31962866   |
| C36 H43 N2 P                                                     | -1.5469201  | -1.4645189   | -1.1889714   | -0.58075196  |
| C28 H57 N4 O9 P S                                                | -3.8942442  | 0.24469426   | -0.8323957   | -0.39841068  |
| C16 H35 N O3                                                     | -1.4652175  | -0.06844614  | -1.3659254   | -0.931805    |
| C14 H14 O S                                                      | -2.5581489  | -0.68772614  | -1.3132188   | 0.5493528    |
| PALMITOYL-CARNITINE (CAS# 2364-67-2); (M+Na)+                    | -2.684665   | 0.33893973   | -0.25004846  | -0.09972918  |
| C16 H35 N O2                                                     | -0.6481234  | -1.1737231   | -0.53861386  | -0.81408036  |
| C8 H10 N4 O2                                                     | -1.9488537  | 1.2251433    | 0.6225436    | 1.1125948    |
| C12 H23 N7 O                                                     | -1.8572614  | 0.40037942   | 0.42102522   | 1.1762774    |
| C21 H16 N10                                                      | 0.25344712  | 0.539888     | 0.42322946   | -0.8836698   |
| C16 H22 N6 O2                                                    | -2.6220307  | 0.23070404   | -0.33521435  | 1.241884     |
| C19 H25 N6 P3                                                    | -2.7942939  | -0.09601774  | 0.5769035    | -0.97458386  |
| C26 H51 N4 O3 P S                                                | -2.8235388  | 0.85831904   | 0.49761856   | -0.09545168  |
| C18 H37 N O3                                                     | -3.2064939  | 1.3829465    | 1.5978804    | -0.36756277  |
| C12 H22 N4 P2                                                    | -4.0838957  | 0.24028268   | 0.36579198   | 0.08243111   |
| C30 H62 N2 O5 P2 S                                               | -0.34689862 | 0.11067003   | -2.744165    | -0.7697966   |
| C37 H74 N4 O4 S3                                                 | -2.579517   | -0.5039576   | -0.550817    | 0.68749577   |
| C14 H18 N2 O2                                                    | -3.731638   | 0.9802223    | 0.56477815   | -0.51057005  |
| C22 H28 O2                                                       | 0.20655318  | -0.4699707   | 0.15913627   | 0.071746856  |
| C25 H46 N7 O2 P S2                                               | -1.0284488  | 0.781335     | -0.5773204   | 0.105566174  |
| C22 H46 O12                                                      | -4.007866   | -0.33419925  | -0.14339525  | -0.22220826  |
| C10 H14 N2 O                                                     | -3.2916117  | -0.2070967   | 1.9244423    | -0.9755474   |
| C27 H54 N5 P S                                                   | 0.09708911  | -3.8981972   | -0.8306422   | 0.2124446    |
| C14 H18 N6                                                       | 0.57104033  | -2.0983245   | -0.29761642  | -1.1784627   |
| JASMONIC ACID [ISTD] (CAS# 77026-92-7); (M+H)+                   | -1.7107263  | -3.307788    | -0.70424694  | 0.55899495   |
| C12 H15 N6 O3 P                                                  | -3.4474993  | -0.5759835   | -0.60114205  | -0.19865663  |
| BENZOATE (CAS# 65-85-0); (M+H)+                                  | -1.5320184  | -1.6089373   | 0.29550135   | 0.41920418   |
| C11 H15 N5                                                       | -2.167644   | 2.4226515    | -0.5242731   | 0.42785615   |
| C24 H47 N4 O6 P                                                  | 0.14453319  | -3.9625347   | -0.7581564   | 0.21630043   |
| C40 H53 N O2 P4                                                  | 0.40022555  | -0.8453919   | 1.5072305    | -0.013352454 |
| C17 H7 N6 O P                                                    | -2.8005326  | -0.8657101   | 1.043972     | -0.53067     |
| C8 H16 N6 O                                                      | -0.6783592  | -0.954904    | 1.4839137    | 1.3601494    |
| C11 H22 O4 P2                                                    | -0.99979645 | -3.7017832   | -0.7077645   | 0.46457282   |
| C23 H40 O P2 S2                                                  | -1.7297742  | -3.415017    | -1.1551683   | 0.17939346   |
| C12 H20 N6                                                       | -2.5714715  | 0.50198895   | -0.60143226  | -1.3975856   |
| HISTAMINE (CAS# 51-45-6); (M+Na)+                                | -1.8810128  | -0.30957943  | -0.07717003  | 0.023000155  |
| C38 H65 O9 P S                                                   | -1.2056212  | -0.58225614  | 0.33320653   | 0.17556705   |
| C31 H39 N O S                                                    | -2.6891353  | -1.964104    | 1.3619943    | 0.82208014   |
| C26 H48 N10 S3                                                   | -0.8579906  | -3.8328736   | -0.28590912  | 0.23170212   |
| C3 H13 N7 O S                                                    | -1.8866587  | -0.9050912   | 1.0134718    | 1.99999418   |
| C28 H49 N4 P3                                                    | 1.3342322   | -3.0592012   | -0.34552115  | 0.9307182    |
| C18 H38 O10                                                      | -3.9778159  | -0.6050532   | 0.08459178   | -0.20902477  |
| C14 H27 N4 O3 P                                                  | -2.8440723  | 0.1805251    | -0.0732275   | 0.6456424    |
| STACHYOSE (CAS# 54261-98-2); (M+K)+                              | -1.5335232  | -1.049953    | -0.3563915   | -0.107705325 |
| LEUCINE (CAS# 328-39-2); (M+H)+                                  | 0.88537276  | 1.2880313    | -0.21365419  | 1.3761312    |
| C13 H24 N2 O                                                     | 0.42880347  | -2.4620988   | -1.233915    | 0.5465057    |
| GLYCOCHENODEOXYCHOLATE (CAS# 640-79-9); (M+Na)+                  | -0.5683355  | -0.16634735  | -0.4004168   | -0.44382983  |
| C34 H45 N4 O8 P S                                                | -0.27193832 | -3.8982384   | -0.8821032   | 0.23758033   |
| C15 H14 N6 O                                                     | -0.38461667 | 1.0685048    | 0.3024841    | -1.5729955   |
| RAFFINOSE (CAS# 512-69-6); (M+Na)+                               | -1.4057988  | -0.56657183  | 0.5772118    | -1.0769364   |
| C23 H47 O P S2                                                   | -0.8752514  | 0.89896584   | 1.0860094    | 1.2857876    |
| N-ACETYL-DL-METHIONINE (CAS# 1115-47-5); (M+H)+                  | -1.9224414  | -0.6746156   | 0.07670759   | 0.51278424   |
| C17 H11 N7 O6 S                                                  | -1.7468479  | -1.2691876   | 2.0909042    | 5.56E-04     |
| C20 H47 N7 O2 S                                                  | 0.90099406  | 2.4352386    | -0.75739825  | 0.69892323   |
| C16 H35 N                                                        | -2.0189774  | -1.0876995   | -1.4810696   | -0.09909929  |
| 1-OLEOYL-RAC-GLYCEROL (CAS# 111-03-5); (M+Na)+                   | -1.792089   | 1.2368438    | -1.851403    | 0.20630306   |
| C11 H14 N2 O5                                                    | -1.2179183  | -3.6101239   | -0.93018675  | 0.51599395   |
| C34 H61 N4 O5 P S                                                | 0.009749591 | -0.19679263  | -3.3793855   | -0.54893523  |
| C38 H66 N2 O2 S4                                                 | 1.8431304   | -1.0065193   | -0.23286545  | -0.70218384  |
| C16 H38 N2 O6                                                    | -1.3156747  | -0.0588565   | 0.27304298   | 0.44120318   |
| C7 H12 N2 O2 S                                                   | -2.204101   | -1.3750087   | -0.6883463   | -1.1189032   |
| C23 H40 N4 O3                                                    | -2.0118096  | 0.6951542    | 1.103343     | -1.9926896   |
| C16 H24 N8 O4                                                    | -2.2317088  | 1.3673209    | 0.6574846    | 0.48511377   |
| C10 H19 N O3                                                     | -0.61875165 | -0.3761592   | 0.15877387   | 0.37049183   |
| C29 H46 N6 O14                                                   | -1.627816   | -0.83979154  | -0.6588407   | 0.97500294   |
| C11 H31 Cl N10                                                   | -0.9116694  | 1.2907778    | -1.775228    | -0.06281473  |
| C26 H54 N O7 P                                                   | -2.1078525  | 1.5582509    | 1.5103111    | 0.17331493   |
| C28 H55 N4 O4 P S                                                | -3.3354588  | 0.053930968  | 0.97087216   | -0.03747478  |
| C38 H60 N6 O4 S                                                  | -2.3722646  | -0.29773143  | -1.795211    | 1.1511779    |
| C31 H60 N O7 P5 S                                                | -0.805899   | -0.29627728  | -0.5971516   | -0.97616446  |
| C8 H9 N O2                                                       | -1.1893934  | 1.549257     | 0.96985865   | 1.0523889    |
| C23 H45 N O4                                                     | -2.4202366  | 0.45193142   | 0.3345098    | -0.048963368 |
| C22 H2 O S5                                                      | -1.2882074  | 0.47627386   | 2.5243783    | 0.86566      |
| C28 H50 N O7 P                                                   | -2.6854377  | 2.6778955    | -0.12679207  | -0.44266382  |

|                                                  |              |              |             |              |
|--------------------------------------------------|--------------|--------------|-------------|--------------|
| C23 H28 N2 O3 S                                  | -0.5983506   | 1.2488241    | -0.8375437  | 2.1116085    |
| C13 H22 N4 S                                     | -3.837069    | -0.45618522  | 0.29980755  | 0.37232342   |
| C21 H32 Cl N2 O P                                | -0.4620298   | 0.36516324   | 0.3208124   | -0.98919666  |
| C25 H14 N2 O3                                    | 0.018762631  | -2.0661705   | -1.0645568  | 1.7131431    |
| C41 H66 N6 S2                                    | -0.7393994   | 0.6663743    | -1.0455828  | -0.74139875  |
| C13 H23 P S                                      | -3.006574    | -1.0221837   | -0.4098743  | -0.89568526  |
| C7 H15 N O3                                      | -0.13875034  | 1.6872091    | -0.7262174  | 0.6755185    |
| C16 H34 O9                                       | -3.9015882   | -0.75326556  | 0.13870107  | -0.28130963  |
| C24 H40 N5 O3 P                                  | -2.2217698   | -0.16285712  | -0.37648436 | 0.83057004   |
| C28 H37 N4 O P S2                                | -0.52781326  | -0.48832348  | -1.482877   | 2.9296737    |
| C11 H19 N7 O                                     | -3.806268    | 1.0665777    | -0.34944502 | 0.5516082    |
| C28 H53 Cl O P2                                  | -0.2724341   | -1.0073507   | 0.03266443  | -1.4391776   |
| C29 H30                                          | 0.73006797   | -1.0074127   | 0.82491195  | -0.552251    |
| 3-METHYLHISTAMINE (CAS# 644-42-8); (M+H)+        | -0.9963517   | 0.6899124    | -1.4900931  | -0.15721908  |
| C26 H51 N3 O S2                                  | 0.8513994    | 1.5209352    | -0.8398854  | 0.42883265   |
| OLEIC ACID (CAS# 112-80-1); (M+Na)+              | 1.486107     | -0.5062395   | 0.58140105  | -1.5466195   |
| C13 H10 N10                                      | -1.7523265   | -1.6030536   | 0.5174086   | 0.2761181    |
| OPHTHALMIC ACID (CAS# 495-27-2); (M+H)+          | -0.68598044  | 1.7098026    | -0.57633805 | -1.1948482   |
| C29 H45 N3 O P2                                  | 0.47865322   | 1.4377685    | -2.2030776  | 0.20910539   |
| C8 H8 O3                                         | -2.8482122   | 0.5381946    | 1.2812766   | -1.9603312   |
| C8 H12 N6 O                                      | -2.0477405   | 1.9469728    | 0.38856634  | 0.10897944   |
| C18 H30 O2                                       | -2.1092556   | -0.8320708   | 0.6466523   | 0.020696227  |
| C19 H37 P S                                      | -2.24126     | -1.2741507   | 0.6311614   | 1.8270042    |
| C9 H24 N6 O2 S                                   | -2.545555    | -0.10405266  | 0.2605688   | 1.431413     |
| C19 H37 O P S2                                   | 0.5646168    | 1.5282812    | -0.0652404  | 0.62753576   |
| C10 H15 N2 O P                                   | -3.8941584   | 0.4615011    | 0.61939067  | 0.2072291    |
| C12 H14 N8                                       | -3.1017      | -0.050714105 | 2.0404558   | -0.38391095  |
| C25 H52 N6 O7 S2                                 | -3.9436479   | 0.037387967  | -0.5670347  | -0.36669162  |
| C29 H50 N6 O7                                    | -1.8767904   | -0.5504375   | -2.8927968  | 0.87038934   |
| C18 H18 O3                                       | -0.981238    | -3.5560863   | -1.1220775  | 0.7482836    |
| C20 H38 N6 O5                                    | -1.6409062   | -0.48842895  | 1.1819241   | 0.5725369    |
| 5-OXOPROLINE (CAS# 4042-36-8); (M+H)+            | -1.4990902   | 0.46441057   | 1.4690636   | 1.2454655    |
| C17 H37 N4 O3 P                                  | -3.5073888   | 1.4843628    | 0.30292135  | -0.10596073  |
| C12 H12 N8                                       | -3.6438644   | 1.2214867    | 0.62184364  | -0.35758942  |
| C25 H34 N4                                       | -1.292741    | 0.026212394  | -0.5418974  | 2.0855284    |
| C22 H45 N4 P S                                   | -3.2421446   | 1.6193696    | 0.3220579   | 1.289182     |
| C33 H47 N7 S2                                    | 0.30061534   | 0.27440965   | 0.0228692   | 1.6837595    |
| C17 H4 N4 O4                                     | -3.1260989   | 1.9819947    | 0.48383692  | 0.21892966   |
| C30 H57 N O2 S4                                  | -1.0039228   | 0.16967604   | -0.29789978 | 0.95427036   |
| C22 H34 N4                                       | -3.568965    | 0.83671916   | -0.30198583 | 0.43984705   |
| C11 H12 N5 O12 P3                                | -0.78432     | -0.51563686  | 2.655273    | 1.0493503    |
| KYNURENINE (CAS# 343-65-7); (M+H)+               | -3.1842337   | 0.8371433    | -0.42316607 | -1.0112402   |
| C9 H16 N2 O2                                     | -0.95383245  | -0.74892473  | 0.12656352  | -1.3072805   |
| C12 H25 N O2                                     | -3.2098935   | 0.65779966   | 0.91713554  | 0.75643194   |
| C16 H38 N4 O4 S2                                 | -0.11578165  | 1.411642     | -1.9650513  | -1.361313    |
| C38 H54 N O P S                                  | -0.037738502 | -0.98401624  | -0.2845663  | 2.05981      |
| C17 H27 N5 O15 S                                 | -3.1720316   | 0.70318556   | -0.45109868 | -0.44988108  |
| C24 H31 O4 P3                                    | -1.5541413   | -2.262147    | -0.68170977 | 0.19745924   |
| C6 H14 N5 O P S                                  | -1.6958358   | -2.4573169   | 1.3038672   | 0.016175568  |
| C36 H69 N2 O3 P S3                               | -0.8688624   | 0.7440169    | 0.27659562  | 0.47567546   |
| C13 H20 N2 O                                     | -2.3697796   | -0.19255581  | 0.71169984  | -0.88776803  |
| C29 H47 N5 O3 P2 S                               | -0.63861775  | 1.0088459    | -0.97372144 | 0.15445969   |
| C12 H14 N8 O                                     | -1.4391114   | -0.14428788  | -0.9568284  | 0.2512659    |
| C24 H45 P                                        | -0.23104815  | -0.858065    | 0.79502517  | -1.1209384   |
| C25 H44 N4 O3                                    | -2.4907143   | 0.4876861    | 1.1970344   | -1.7949463   |
| C18 H20 P2                                       | -2.7684937   | -1.9843507   | -0.34605002 | -1.5470408   |
| C32 H44 N13 P3                                   | 0.7578278    | -0.7113665   | 1.4599562   | -0.58766985  |
| C28 H52 N O2 P S2                                | 0.8152689    | 1.2693583    | -0.0461964  | -0.02344215  |
| C32 H52 O6 S2                                    | -0.46261254  | -3.8200407   | -1.0364127  | 0.08882958   |
| C7 H10 O2 S3                                     | -2.6531847   | -0.8373215   | -0.2247502  | 0.8183775    |
| C16 H36 N2 O5                                    | -2.463318    | -1.1642834   | -1.0118464  | 1.8769995    |
| C13 H22 O3                                       | 0.8249457    | 0.3313735    | 1.3484138   | -0.19006279  |
| C15 H14 P2                                       | -0.20710087  | -3.509773    | -0.68946564 | 0.8719148    |
| C36 H71 O P S4                                   | 0.35045058   | -0.42051938  | -1.6533626  | 0.5299125    |
| C18 H48 N8 O2 S2                                 | -0.8388306   | -0.05575522  | 1.7692661   | 0.36622527   |
| C8 H16 N2 O3                                     | -2.8827982   | 1.6768484    | -0.5566831  | -0.3969028   |
| FERULATE (CAS# 1135-24-6); (M+H)+                | 0.18329042   | 0.74892056   | -1.4050504  | -0.88105965  |
| C13 H16 N6                                       | 2.9642324    | 0.59634984   | 0.61558604  | -0.9716052   |
| C15 H18 N6 O S                                   | -2.3789008   | 0.38592222   | 1.577905    | -1.6373224   |
| C13 H31 N3 O3                                    | -1.2056282   | -1.839304    | 0.8591075   | 1.8758631    |
| C21 H46 N O P S                                  | -0.8949916   | -0.41283822  | 2.8344157   | 1.2972097    |
| C21 H37 N                                        | -0.7868902   | 0.92449373   | -3.22057    | -0.8064803   |
| C10 H18 N6 O3                                    | -1.7416226   | -0.25317606  | 1.2008743   | 1.4179223    |
| C8 H15 N O4                                      | -0.9955815   | 0.9047992    | 0.34301296  | -0.88091373  |
| N-ACETYL-DL-SERINE (CAS# 97-14-3); (M+H)+[H2O]   | -1.3434834   | 0.7818122    | 0.0813066   | 0.3240615    |
| C13 H26 N6 O                                     | -0.6748641   | 1.0656413    | 0.64067674  | 1.9410596    |
| C40 H76 O12                                      | -1.3165092   | -0.6071454   | -0.09742066 | 0.37908825   |
| C10 H9 N O3                                      | -3.7955844   | 1.1768328    | -0.6227312  | -0.7814392   |
| C30 H57 N O4 P2 S3                               | -2.1183305   | -0.24727291  | 0.3524888   | 0.24635275   |
| C15 H30 N6 O                                     | -1.8386497   | -0.035384625 | 1.4706063   | 1.526237     |
| C25 H49 N O4                                     | -0.96916264  | 0.74424684   | 1.1975647   | -0.3862605   |
| PROSTAGLANDIN E2 (CAS# 363-24-6); (M+Na)+        | -1.057416    | 0.20742206   | -0.8643784  | -1.291334    |
| C12 H21 N3 O5                                    | -3.1377301   | -0.22655863  | -0.06458884 | 0.5556354    |
| C15 H26 N2 O4                                    | -2.1785462   | -0.5409069   | -0.3899839  | 0.50768995   |
| C16 H22 O4                                       | -2.1941526   | -1.801065    | -0.20474404 | 0.3300118    |
| ALPHA-LINOLENIC ACID (CAS# 463-40-1); (M+Na)+    | -1.3317596   | -1.6304352   | 0.66926885  | 0.13086995   |
| C30 H36 O6 S                                     | 0.84348094   | -0.70580053  | -0.63163656 | 1.9340677    |
| C8 H16 N6 O4                                     | -3.6480403   | -0.7253966   | -0.6675352  | -0.29859534  |
| C8 H16 N6 O2                                     | 0.1240489    | -1.5539788   | 0.7453752   | 1.9532802    |
| C12 H28 O2 S2                                    | -2.942992    | -0.7840021   | -0.37931484 | -1.0546898   |
| C12 H14 O5                                       | 0.29046708   | -0.6118406   | -0.2633012  | -0.16762048  |
| C28 H45 N7 O4 P2                                 | -0.22478154  | 0.19407108   | 0.15094668  | -0.066190615 |
| C11 H14 N6 O2                                    | -1.6977525   | -1.1438372   | 0.92469364  | 0.8447863    |
| L-TRYPTOPHAN-15N2 [ISTD] (CAS#); (M+H)+          | -1.4129399   | -2.119947    | -1.4432677  | -1.279818    |
| C6 H13 N O2                                      | 0.9571188    | 1.2422783    | -0.328742   | 1.3841684    |
| C18 H28 O3                                       | -2.5467653   | -1.2306739   | 1.7175896   | 0.7827469    |
| C14 H39 Cl N10 O                                 | -0.4272654   | 1.0368086    | 0.44320965  | 2.2305093    |
| C12 H21 N4 O4 P                                  | -2.0690746   | -2.9101777   | 1.4982846   | 0.042711362  |
| C18 H28 O2                                       | -0.9783491   | 0.23612046   | -1.5764129  | 0.35208607   |
| METHYL JASMONATE (CAS# 1211-29-6); (M+Na)+       | 2.1247923    | 0.9073864    | 1.2088023   | 0.7607207    |
| C15 H29 N O4                                     | -2.4811547   | -0.034050435 | 0.9604906   | 0.20969684   |
| JASMONIC ACID [ISTD] (CAS# 77026-92-7); (M+Na)+  | -1.3333988   | -3.605035    | -0.9280966  | 0.45793965   |
| C15 H14 N6                                       | -2.68001     | 0.19918884   | -0.46115172 | -0.28609776  |
| C8 H12 P2 S2                                     | -0.2348295   | 2.3174767    | -2.2211218  | -0.54335207  |
| C21 H40 N2 O S                                   | -1.3684893   | -0.7809839   | 0.058613148 | 0.76206744   |
| C33 H39 N3                                       | -1.168969    | 1.0472331    | -0.19384512 | 1.0016146    |
| C19 H24 N10 O5                                   | -1.8789372   | -0.33890897  | -2.1788828  | 0.22878043   |
| C33 H44 O12                                      | -0.37446105  | -3.8893852   | -0.9037441  | 0.17749396   |
| C27 H51 O3 P S2                                  | 1.8378421    | -2.9053972   | 0.48399764  | 0.06675321   |
| C12 H6 N4 O2 P2 S4                               | -1.5973027   | -0.2918124   | -2.309619   | 0.21888162   |
| C11 H21 N7 O                                     | -1.4377849   | 0.352964     | 0.7802347   | 1.2264699    |
| C26 H51 N7 O4                                    | -0.2328046   | -3.8841336   | -0.6787214  | -0.053887427 |
| C31 H62 Cl2 N2 O2 P2                             | 0.014689431  | -1.2589974   | 1.0264157   | 0.48606613   |
| C22 H47 N                                        | -0.15663928  | 1.4038491    | -0.7464515  | 2.2943811    |
| C26 H44 N7 O5 P                                  | -3.2179546   | 1.7112396    | 0.4692979   | -0.6463922   |
| C8 H9 N                                          | -3.4836438   | 1.6258802    | 0.12129421  | -0.9203101   |
| C19 H24 N10 P2                                   | 0.3378684    | -1.5889173   | -1.314361   | 1.4895552    |
| C18 H39 Cl N4 O3                                 | -0.26156563  | 1.3064289    | -2.529562   | -0.22399637  |
| C13 H17 P S                                      | -2.2195508   | -0.58278626  | 0.45313329  | -0.7071752   |
| C26 H28 N6 O S2                                  | -2.3008924   | -0.5496447   | -1.6244138  | 0.11511711   |
| C16 H20 N4 O2 P2                                 | -2.5514488   | -1.1571907   | 0.118986845 | 0.6851344    |
| C26 H52 N O7 P                                   | -2.722033    | 2.4432104    | -0.30748862 | -0.37696946  |
| C14 H19 P S                                      | -3.6244783   | -0.3377337   | 0.8360598   | -0.8332908   |
| N-ACETYL-DL-METHIONINE (CAS# 1115-47-5); (M+Na)+ | -2.3723052   | 0.3880761    | -0.5027405  | 0.9602256    |
| C31 H53 N O9 P2 S                                | -2.4912858   | 1.654848     | 0.27985123  | 0.43337333   |
| LEUKOTRIENE B4 (CAS# 71160-24-2); (M+H)+         | 0.6732704    | -0.46714255  | -0.46478832 | 0.033953212  |
| C15 H23 N5 O3                                    | -0.44029203  | -0.02797804  | -0.7873759  | 0.2510338    |
| C23 H30 O3                                       | 0.9975152    | -0.9851292   | -0.37811267 | -1.5577122   |
| C14 H24 N6                                       | -2.6350932   | 0.14731318   | 0.093862355 | 2.0670946    |



|                                                     |              |             |              |              |
|-----------------------------------------------------|--------------|-------------|--------------|--------------|
| C35 H70 O2 P4                                       | 0.27911067   | -0.56471336 | -2.6221297   | -0.3693717   |
| C26 H53 N4 O P S                                    | -2.5401177   | 0.69916975  | 1.77561      | 0.76350236   |
| C16 H23 N5                                          | -2.0915666   | 0.24697253  | 0.11248317   | 0.54632974   |
| C14 H26 N4 P2                                       | -3.3063567   | -0.2093288  | 0.0299232    | 1.257437     |
| C23 H46 N O2 P3                                     | -0.9408423   | 0.8785209   | -0.12574802  | 0.5672213    |
| C9 H5 N O4                                          | -2.3110569   | 0.115735605 | -1.0341995   | -1.9708568   |
| C13 H32 N2 O P2 S                                   | -1.6721852   | -0.09505564 | 1.3696065    | 1.2264802    |
| C25 H29 N5 O2                                       | -0.41844994  | -1.6274889  | -0.9199759   | -1.0961945   |
| C5 H10 N2 O S                                       | -1.9703293   | -1.206024   | -0.8658367   | -0.96177363  |
| C16 H31 O P3 S                                      | -0.6819438   | 0.4584741   | -3.0215716   | 0.09952554   |
| C5 H9 N O2                                          | 0.7783901    | 2.0439384   | -0.76184493  | 0.12372125   |
| C15 H34 N2 O5                                       | -0.49500663  | 0.33408463  | -0.41874987  | -0.1490111   |
| C23 H47 N5 S3                                       | -2.8141212   | 2.4013622   | 0.5666471    | -0.088118955 |
| C19 H39 N4 O4 P                                     | -1.2973654   | 0.7431546   | -2.2988377   | 2.2898479    |
| C25 H40 N10                                         | -0.48622626  | -4.013825   | -0.15321806  | 0.34591642   |
| C33 H5 O9 P5 S                                      | -1.1563135   | 1.442202    | -0.32357526  | -0.59401613  |
| C41 H53 N2 P S2                                     | 0.006936431  | 0.16335848  | -0.24427676  | 2.3355722    |
| C23 H34 O2 P2                                       | -1.7117599   | -0.27597845 | -1.5702329   | -1.6223966   |
| C21 H23 N2 O9 P S2                                  | -3.3154047   | -0.4462774  | -0.11125556  | 0.39834684   |
| C28 H56 N2 O6 S2                                    | -0.4907223   | -0.5787221  | -2.8995137   | -0.5115645   |
| C27 H38 N10                                         | -0.33637512  | -3.9749305  | -0.51640075  | 0.3629254    |
| C9 H11 N                                            | -3.1607258   | 0.44684738  | 0.20453696   | -0.845454    |
| C31 H32 N O P                                       | -2.133883    | 0.9557488   | 0.85302603   | -1.8891648   |
| C9 H11 N O3                                         | -0.6451698   | 1.0930635   | 0.36333093   | 1.0531056    |
| C14 H38 N4 O6 P2                                    | 0.92503834   | 2.211652    | -0.7024074   | 0.48408383   |
| C34 H49 Cl P2 S3                                    | -1.5139349   | -0.8473667  | 1.3099754    | -1.5352638   |
| C23 H46 N5 O3 P3                                    | -0.35408485  | -1.3747739  | -1.4619274   | 1.7878395    |
| C6 H14 O4                                           | -3.3032238   | -0.33257142 | -1.6184118   | -0.08928284  |
| C17 H32 N8 O                                        | -2.6536386   | 1.3973045   | -0.86513317  | 0.58493733   |
| C14 H34 N2 O6                                       | 1.0201678    | -1.6787924  | 0.31678203   | 1.167074     |
| C34 H56 O2 P2                                       | -1.3997166   | 0.119522266 | 0.08198981   | 0.0476294    |
| C9 H11 N O2                                         | -3.475202    | 1.6352051   | 0.10573781   | -0.93291396  |
| C12 H25 N O                                         | -0.79872674  | -1.4480178  | 2.7266896    | 0.68432635   |
| C23 H32 O4                                          | -0.7876915   | 0.24237227  | -1.2589808   | -0.3347191   |
| C47 H34 N3 P                                        | -2.4026256   | 2.1525257   | 1.0582318    | -1.0768117   |
| C16 H14 N2 P4                                       | -2.5350754   | 0.6817584   | 1.5508347    | -0.33742657  |
| C33 H55 N P6                                        | 0.6062651    | 1.9165235   | -1.3426484   | 0.34697413   |
| C21 H43 N4 O5 P                                     | -1.5275222   | 0.32373205  | -2.8185031   | 1.7794255    |
| C34 H62 N10 O S2                                    | -2.1412222   | 1.8101802   | 0.24228145   | -0.058830738 |
| C21 H25 N11                                         | -2.5600443   | -0.85910296 | -0.3287924   | 0.9293349    |
| C24 H51 N O2                                        | -2.3930393   | -1.5149329  | 1.8192888    | -0.37755492  |
| C22 H23 N3                                          | 0.71830237   | 0.8888848   | -0.90388817  | 1.3691064    |
| URIDINE (CAS# 58-96-8); (M+Na)+                     | -3.337608    | 1.4968606   | 0.63917315   | 0.19937573   |
| C23 H43 N3 O3 S2                                    | -3.151598    | -0.73476535 | -0.39902008  | -0.73213106  |
| 5'-METHYLTHIOADENOSINE (CAS# 2457-80-9); (M+H)+     | 0.5187355    | 1.2371997   | -0.38853636  | 0.2664074    |
| C26 H39 N3 O6                                       | -2.7090073   | 2.7618566   | -0.2417179   | 0.19701724   |
| C18 H28 N4 O10                                      | -1.8639069   | -1.4094297  | 0.6612856    | 1.1100347    |
| C33 H64 N12 O3 S2                                   | -1.8422446   | -1.2129576  | -1.201676    | 1.1851974    |
| C34 H34 O7                                          | -0.08377248  | -0.44385302 | -1.1896963   | 3.1859322    |
| (-)-SALSOLINOL (CAS# 27740-96-1); (M+H)+            | -0.9303589   | 0.84444636  | -0.121444374 | 1.1776818    |
| C16 H31 P3                                          | 1.45409      | -0.6820437  | -1.0952138   | -1.2632142   |
| C21 H44 N6 S2                                       | -0.7173506   | 1.0139636   | -1.0139425   | 1.2084687    |
| C24 H19 N6 O3 P                                     | -3.020796    | -0.9762962  | -0.7990893   | 0.39975184   |
| C36 H38 N2 O4                                       | -2.0538673   | -1.6803122  | -1.4916426   | -1.1507511   |
| C21 H41 N O4                                        | -1.8918039   | 0.17958337  | -0.78468484  | 0.1715483    |
| C10 H12 N4 O5                                       | 0.0779763    | 1.3228431   | 0.89268434   | 0.63092625   |
| C3 H9 N2 O2 P                                       | -3.2232912   | 1.5068239   | -0.15810895  | 0.098381236  |
| C19 H45 N7                                          | -1.8921871   | -1.4352933  | 1.9418081    | 0.49913687   |
| HISTAMINE (CAS# 51-45-6); (M+H)+                    | -2.8192756   | 1.5860589   | -0.2706797   | -1.3639263   |
| C3 H9 N2 O4 P                                       | 0.8716119    | 1.5958061   | 0.017834403  | 0.77206445   |
| C5 H10 N6 O                                         | 0.31144547   | -0.9996286  | -1.7575706   | 0.23180282   |
| C17 H26 O4                                          | -0.8099831   | -0.15693319 | -0.9477377   | 0.44559354   |
| C18 H12 N10                                         | -1.4110717   | -3.5011985  | -1.1434186   | 0.3483774    |
| C32 H59 N4 O4 P2 S3                                 | -0.14834033  | 1.6379851   | -0.5982574   | -0.629639    |
| C23 H31 N O6                                        | -1.6392821   | -2.379481   | 1.6513839    | -0.17731547  |
| C18 H25 N4 O5 P                                     | -1.4662533   | -0.62250876 | -1.8304433   | 0.73771447   |
| C29 H46 O4                                          | -1.0545561   | -3.7499475  | -0.4940603   | 0.5176574    |
| PANTOTHENATE (CAS# 79-83-4); (M+Na)+                | -2.5931046   | 0.28602707  | 0.09570083   | -0.28899282  |
| TYROSINE (CAS# 60-18-4); (M+H)+                     | -2.546705    | 1.2996312   | 0.180734     | -0.6370119   |
| NAD (CAS# 53-84-9); (M+H)+                          | 0.46440828   | 0.77522814  | -2.4924366   | -0.958249    |
| C26 H38 N10                                         | -1.6424911   | 0.32634795  | 0.78751045   | -1.1960614   |
| C13 H23 N4 P                                        | -3.021763    | -1.5210049  | -1.0222526   | -0.453725    |
| C27 H49 N4 O2 P5                                    | -2.3409967   | -1.303094   | 0.7799925    | -0.73264706  |
| C18 H40 N5 O2 P                                     | -1.216688    | 1.2504787   | 0.34847152   | -0.35703975  |
| C11 H12 N6 O                                        | -0.0434165   | -1.611689   | 1.6104758    | 0.65363276   |
| C24 H35 N O S2                                      | -1.6081812   | -0.418997   | 1.2427925    | 0.114243455  |
| C9 H19 N2 O3 P                                      | -2.810835    | 0.40706152  | 0.3565895    | -0.6139711   |
| C9 H8 N5 O11 P3                                     | -0.10903058  | -0.4970411  | 2.1700907    | 1.7174007    |
| C13 H20 O4                                          | -3.2540736   | 0.7873666   | -0.55641246  | 0.65270984   |
| C11 H11 N O3                                        | -1.3927623   | -1.4080682  | -0.76707405  | 0.63989896   |
| C13 H20 O2                                          | -1.5531888   | -0.24955577 | 0.11848647   | -0.9482984   |
| C21 H24 N4 O4                                       | 1.1624027    | -1.8361392  | -0.7054998   | 2.163001     |
| S-ADENOSYL-L-HOMOCYSTEINE (CAS# 979-92-0); (M+H)+   | -1.3930523   | 0.27375588  | -0.72545934  | -2.0499868   |
| C22 H26 O6                                          | -2.9378746   | -2.4299026  | 1.0294114    | -0.49207193  |
| C30 H55 N O5 P4                                     | -3.143554    | 2.2944813   | 0.080285296  | -0.4995067   |
| C18 H20 N P                                         | -3.56117     | 1.4881521   | -0.4189207   | 0.48777837   |
| BIS(2-ETHYLHEXYL)PHTHALATE (CAS# 117-81-7); (M+Na)+ | 0.29441693   | 0.26293138  | -0.27852386  | 2.2934747    |
| C11 H12 N10 O                                       | -2.2030475   | -0.67148364 | -0.785097    | 1.0573977    |
| C21 H21 N5                                          | 1.3246123    | 1.0368407   | -0.7789979   | 1.369925     |
| C14 H24 N6 O                                        | -1.8375827   | 0.7136058   | 0.62384593   | 0.92211616   |
| C14 H26 N6 O                                        | -1.9916086   | -0.5320938  | -0.36841777  | -0.7258844   |
| C23 H47 N4 O P S                                    | -0.062287726 | -1.9913726  | 0.062489294  | 2.4112506    |
| C22 H49 N7                                          | -2.1964662   | -1.3178734  | 0.9794999    | -0.11866776  |
| C9 H12 N6 P2                                        | -2.4978676   | -1.417713   | 1.5853488    | -0.05373214  |
| C37 H77 N4 O P S3                                   | -2.8408024   | -0.5043814  | 0.6036434    | 0.512692     |
| C34 H52 N6 O2 S                                     | -1.6631095   | -0.88720953 | -2.2695282   | 1.3411736    |
| C28 H24 N9 O P                                      | -2.7288408   | -0.07032862 | 0.3719665    | -0.32635212  |
| C7 H19 N3                                           | -2.594733    | 0.3385852   | 0.43932837   | 2.504736     |
| C27 H48 N6 O S2                                     | -0.08485809  | -0.52320886 | -2.9643157   | -1.0076337   |
| C11 H20 O3 P2 S                                     | -3.79427     | 1.3782586   | 0.4589143    | -0.25616407  |
| C15 H20 N6 O3                                       | 0.30418497   | -0.67084515 | 1.2623825    | 0.4647657    |
| C23 H26 N3 P                                        | -0.58682114  | 1.373982    | -1.245364    | 0.50251126   |
| C15 H20 N6 O2                                       | -2.1774423   | -1.8226835  | 1.5169814    | 0.40243298   |
| C13 H25 N7 O                                        | -2.0219238   | 0.34090114  | 0.5942794    | 1.3724834    |
| C25 H51 N O4                                        | -2.549553    | 1.7206575   | 0.4703652    | -0.6271171   |
| C17 H28 N2 O4                                       | -1.413315    | 1.6007912   | 0.77730435   | 0.98279464   |
| C19 H44 N2 P2 S                                     | 0.8184459    | 1.4941815   | -2.406882    | -0.18710016  |
| C5 H4 N4 O2                                         | -0.8045942   | 3.1011634   | -1.183265    | 0.78429824   |
| C35 H50 N O10 P S2                                  | -1.9671538   | -0.42434978 | 1.2231797    | -0.29898006  |
| RAFFINOSE (CAS# 512-69-6); (M+K)+                   | -1.6844046   | 0.8469633   | 0.34711856   | 0.41335484   |
| C17 H36 N4 O10 S                                    | 1.9506555    | 0.9650649   | -0.4227391   | 0.28606868   |
| NICOTINAMIDE (CAS# 98-92-0); (M+H)+                 | -0.33425203  | 1.4665644   | -0.1566468   | 0.029289491  |
| C32 H63 N4 O6 P S                                   | -2.0079856   | 0.57612836  | 1.0119458    | 0.5375158    |
| C5 H15 N4 O3 P                                      | -3.2375026   | 0.722772    | -1.6091368   | -1.4133008   |
| C13 H27 N S2                                        | -2.4487584   | -0.28318727 | -0.001753181 | -0.8258197   |
| C33 H67 N4 O11 P                                    | -2.282196    | -0.9927593  | -2.861115    | 0.19018449   |
| C15 H28 N6 O2                                       | -0.24735357  | 0.98031026  | -2.7466145   | -0.017516177 |
| C31 H43 N5 O12                                      | -3.0320117   | 2.2974217   | 0.44149986   | -0.3559481   |
| C22 H20 O5                                          | -0.87684965  | 0.4589346   | -2.6973872   | -0.012257889 |
| C17 H34 N6 O6 S2                                    | 1.4118364    | 0.79099107  | 0.19977903   | 0.1807589    |
| C30 H51 O6 P S                                      | 0.48212135   | -3.7905126  | -0.101022035 | -0.13517699  |
| C10 H13 N5                                          | -0.6011265   | 2.0919893   | 0.2129242    | 0.99724925   |
| C27 H43 N7 O16                                      | -0.697048    | -0.50239456 | -0.006752558 | 0.72844803   |
| LYSINE (CAS# 56-87-1); (M+Na)+                      | 0.8565466    | -0.60583484 | -0.625834    | -0.47107795  |
| C23 H20 N4 O                                        | -3.3330393   | -1.8335449  | 0.6150744    | -0.4425868   |
| C18 H33 N7                                          | -1.4163085   | 0.8956879   | -1.2872088   | 0.6788082    |
| C10 H28 N6 O S                                      | 1.8742523    | -0.7782141  | 0.19121788   | -1.0781043   |
| C28 H41 N O6                                        | -3.1205096   | -1.6268837  | -0.41023397  | -0.7784794   |
| C34 H46 N3 O3 P                                     | -0.8971503   | -1.1497995  | -1.24172     | 1.4168925    |

|                                         |             |             |              |              |
|-----------------------------------------|-------------|-------------|--------------|--------------|
| C14 H31 N6 O P S                        | -2.179431   | -0.6678458  | -0.006038189 | -1.5983853   |
| C14 H20 N2 O                            | -2.9765277  | 0.19555348  | 1.3711474    | -1.6826026   |
| C40 H41 N7 O S2                         | 0.57698673  | 0.42319083  | -1.464516    | 0.7719332    |
| C34 H55 N5 O11                          | 1.7895309   | 1.8090847   | -1.2311745   | -0.5681226   |
| C14 H27 N4 O2 P                         | 3.4212785   | -1.2863847  | -0.33984     | -0.4477488   |
| C23 H44 N2 O2 S                         | -1.4549971  | 1.4889709   | 0.013958603  | 1.8278941    |
| C26 H27 Cl O5                           | -1.3818434  | -1.0116944  | -1.4894403   | 2.5248098    |
| C10 H18 N6 O                            | -0.82154906 | -1.8163897  | 0.020863034  | 0.76211566   |
| C16 H24 N6 O                            | -1.1799576  | 2.2797146   | -1.3427334   | 0.10932675   |
| C18 H42 N5 P                            | -1.9774412  | 1.7729076   | 0.6010467    | 0.52662337   |
| C26 H50 N O2 P S2                       | -1.2152525  | 1.4566998   | -0.36627242  | -0.027483642 |
| C16 H19 N8 O3 P                         | -0.91831076 | 0.22202273  | -0.21801805  | -0.96303874  |
| C29 H49 N3 P2 S                         | -2.4957068  | 2.447485    | -0.746608    | 0.80663514   |
| C23 H36 N17 O P                         | 1.934663    | 0.7851167   | -0.49641567  | -0.018218003 |
| C41 H51 N3 O4 S                         | -0.1365713  | 0.9487623   | -2.0693111   | 1.2244427    |
| C15 H31 N O2                            | -1.8990791  | -0.4398917  | -1.9410796   | 1.1056299    |
| C37 H56 N2 O2 P4                        | 0.87752753  | 1.0859064   | -0.118912324 | 0.7511898    |
| C24 H50 N O7 P                          | -3.187512   | 1.6661218   | 1.2988892    | -1.0906082   |
| C27 H46 N6 O6                           | -1.7529426  | -0.28354144 | -2.947007    | 0.8713429    |
| XANTHOSINE (CAS# 146-80-5); (M+Na)+     | 1.3178105   | 1.4454154   | -1.6789218   | -0.15018973  |
| C4 H11 O2 P                             | -2.6744719  | 0.7945962   | 0.099191986  | -0.6618179   |
| INOSINE (CAS# 58-63-9); (M+Na)+         | -0.7928662  | 0.9005589   | 0.4277577    | 0.9627808    |
| C24 H29 O6 P S                          | -2.8928735  | -2.2909963  | 1.1365883    | -0.55561805  |
| C20 H41 N O3                            | -3.3486717  | 0.075364724 | 1.7783133    | -0.48853528  |
| C16 H16 O4                              | -2.4234247  | -0.26294878 | 1.307554     | 0.922678     |
| C15 H11 N9                              | -2.0896447  | 0.601145    | -1.0208343   | 0.3224817    |
| C10 H13 N5 O                            | -0.19186951 | -3.9258687  | -0.8144287   | 0.48616758   |
| LYSINE (CAS# 56-87-1); (M+H)+           | 1.7208912   | 0.49590546  | -1.3599594   | -2.3655195   |
| C12 H24 N6 O                            | -3.2682366  | -0.31778073 | 1.1211922    | 0.47359636   |
| C13 H14 O4 P2                           | -1.4799974  | -0.7355219  | 1.3989365    | 0.37457895   |
| C27 H50 N7 P S2                         | -3.3488908  | 1.2309847   | -0.19664553  | -0.6512173   |
| C7 H18 O2 P2                            | -3.6692696  | 0.35740626  | 0.79786706   | 1.060679     |
| C40 H51 N3 O4 S3                        | -1.5501273  | -2.0396678  | 1.6301292    | 1.3773642    |
| C4 H8 N6 O                              | 0.54897374  | 0.42919147  | -1.282306    | 1.2576783    |
| C27 H32 N6 O2 P4                        | -1.4108886  | 0.07381738  | 1.6212491    | 0.117373936  |
| C26 H52 N2 O2 S2                        | -1.1010486  | 0.70340705  | -0.042864725 | 0.7562456    |
| C20 H41 N O2                            | -2.5332134  | -0.9478686  | 1.9209479    | 0.23878138   |
| C21 H26 S2                              | -0.2494868  | -3.5499218  | -0.17343098  | -0.67273164  |
| C10 H14 N6                              | 0.021141317 | 0.6053931   | 0.6751953    | -0.6287955   |
| PHENYLALANINE (CAS# 63-91-2); (M+Na)+   | -3.3943985  | 1.725188    | 0.10723989   | -0.96528393  |
| C18 H41 N13 S                           | 0.9178934   | 2.400365    | -0.429247    | 0.60870045   |
| C21 H40 N2 O3 S                         | 0.959175    | 1.2449143   | -0.5767095   | 1.5278773    |
| C10 H18 N O6 P                          | -1.057164   | 2.0523863   | -0.07628386  | -0.44931805  |
| C16 H28 N P S                           | -1.872255   | 0.14047562  | 0.28471267   | 1.2501595    |
| C30 H28 P2                              | -2.5311677  | -0.1663066  | -0.8619591   | 0.40824974   |
| NORMETANEPHRINE (CAS# 0); (M+H)+[H2O]   | -3.4768162  | 1.6336782   | 0.105398856  | -0.9313097   |
| C42 H41 N O3 S2                         | -2.976767   | 1.8772143   | 0.6133791    | -1.5053883   |
| C22 H38 N10 O2                          | 0.44429946  | -1.4722084  | -2.1419895   | -0.30557746  |
| C21 H39 N3 O3 S2                        | -1.0294995  | -2.7108278  | 1.0689812    | 0.091822565  |
| C22 H38 N8 O                            | -2.584483   | -0.73459363 | 0.88656634   | 0.2906121    |
| C36 H41 N3 O S                          | 0.16620329  | 0.12904067  | -0.7994133   | 1.4692539    |
| FRUCTOSE (CAS# 57-48-7); (M+Na)+        | 0.62752813  | 0.49657622  | -0.11321928  | 0.26126263   |
| C24 H27 N3                              | 0.5143176   | 1.5730917   | -0.5334772   | 0.93903023   |
| C42 H65 N O5 P2                         | -0.18906955 | -1.2329373  | 3.3165383    | 0.6736731    |
| C24 H46 N2 O3 S                         | -0.34366626 | 2.7419562   | -0.15276214  | 0.804878     |
| C11 H8 O S3                             | -2.5961952  | 0.68180436  | 1.2880679    | -2.0200512   |
| C20 H43 N O4                            | -1.6650671  | -1.7191294  | -0.20606238  | 0.7920922    |
| C20 H43 N O3                            | -2.0749602  | -1.0581517  | 1.4669526    | 0.22319864   |
| C44 H86 N2                              | -1.7757478  | 0.5462092   | 0.024454072  | -0.25669938  |
| C4 H11 N3 O                             | -0.16478236 | 0.2525591   | -0.1598764   | -1.169029    |
| C14 H35 N7                              | -3.2280962  | 0.991594    | 0.63845587   | -0.43778947  |
| C31 H64 N2 O3 S4                        | 0.2397959   | 0.66952616  | 0.24532297   | -0.03524429  |
| C20 H35 N7                              | -2.8537922  | 0.40233982  | 1.4518205    | 1.8268226    |
| C12 H18 N2 O                            | -3.141184   | 0.09596422  | 1.5607386    | -1.7203114   |
| C18 H24 Cl N4 O4 P                      | -2.46888    | -1.4701505  | -0.94768727  | 1.4629153    |
| C25 H41 N7 O2 S                         | -2.081546   | 1.1131183   | -0.8617533   | 1.1295877    |
| C9 H16 N6 O2                            | -1.8751132  | -1.2677754  | 0.7819985    | 2.1530013    |
| C44 H86 O3                              | -0.82405996 | -0.3999859  | -0.62328094  | -0.65445197  |
| CHOLINE (CAS# 62-49-7); M+              | 1.1054405   | 1.1545273   | -1.4431905   | 1.1899222    |
| C37 H69 N8 O P S                        | -0.38370454 | -0.37028226 | 0.80927044   | 1.9503996    |
| C11 H9 N9 O                             | -3.5972872  | -0.38881463 | 0.08815856   | -0.67520726  |
| C15 H35 N4 O3 P                         | -3.0747097  | -0.34977302 | 1.0646961    | 0.7665492    |
| C9 H19 N O                              | 1.4369434   | 0.10731107  | 0.30858237   | 1.3942978    |
| C35 H40 N2 O4                           | -1.7198716  | 0.013036888 | 0.8610764    | -0.8700451   |
| C20 H32 O10                             | -1.337029   | -0.8649652  | -1.2380102   | -0.001063943 |
| C39 H83 N4 O P                          | 0.3837369   | -0.31290197 | -0.28252026  | -1.4425733   |
| C18 H34 N6 O2                           | -0.9997245  | 0.7329143   | -1.6243795   | 0.51311886   |
| C11 H18 N4 S                            | -4.060697   | 0.012310207 | 0.5527016    | 0.19040355   |
| C19 H39 N7 O2                           | 0.22965598  | 2.100902    | -2.4336417   | 1.208274     |
| C34 H69 N4 O5 P S                       | -2.4088316  | 0.32563886  | 0.71342814   | 0.10262379   |
| C29 H62 N8 O S3                         | -0.10653184 | -1.0392276  | -0.93665695  | 2.3816285    |
| C20 H27 N4 P                            | -0.8686928  | -0.90859175 | 0.66199243   | -0.567844    |
| C33 H50 Cl N O6                         | 0.17425802  | 0.29823408  | 2.2149363    | 1.0070224    |
| C6 H4 O6 S                              | -0.21822317 | 0.42043018  | -0.18909878  | -0.27727124  |
| C18 H36 N6 O9                           | -4.01029    | -0.42210126 | -0.012967959 | -0.23133004  |
| C22 H27 N11                             | -1.922956   | -0.5243874  | -2.0952306   | 0.11792205   |
| C18 H39 N9 S                            | -2.0766897  | -0.84315515 | -0.36145002  | -1.2458003   |
| C17 H35 N2 O P3 S                       | -0.93431896 | 0.613497    | -2.3893356   | -0.580998    |
| C32 H66 N8 S4                           | -3.7172291  | -0.74611366 | 0.567598     | 0.7309977    |
| C25 H42 N6 O5                           | -1.8127514  | -0.57999504 | -2.7492557   | 1.6323388    |
| C5 H10 P2                               | -2.3211322  | 1.755446    | -0.32519838  | -0.5061576   |
| HYPOXANTHINE (CAS# 68-94-0); (M+Na)+    | -2.1142962  | 0.22089863  | 0.3198531    | 0.84797144   |
| GLUTATHIONE (CAS# 27025-41-8); (M+H2)+2 | -0.42786938 | 0.7958617   | -0.8007054   | -1.1201842   |
| C32 H30 O7                              | -1.1188438  | -0.6955401  | -1.3051231   | 2.627499     |
| C14 H28 N6 O2                           | -1.3548312  | 0.3270161   | -0.15176137  | 2.067302     |
| C37 H47 N5 S                            | 0.2241396   | 0.102959126 | 0.45331317   | -0.48361325  |
| C31 H41 N8 P                            | -2.405971   | 1.1174704   | 0.6383574    | 0.76455563   |
| SPERMINE (CAS# 71-44-3); (M+H)+         | -1.4724699  | -0.48232645 | 0.98494756   | 1.6386261    |
| C5 H13 N4 O5 P                          | -2.0830278  | 0.2587247   | -0.8396586   | 0.18973774   |
| C28 H34 O S                             | -2.565796   | -1.3313075  | -1.414851    | 0.61599433   |
| C15 H36 N2 O P2 S                       | -2.5265934  | -0.15423894 | 0.29181325   | -0.013741657 |
| C34 H44 O S                             | 0.3786145   | -0.14090577 | -0.8828739   | 2.7217443    |
| C33 H67 N4 O5 P S                       | -0.54813707 | 1.0159677   | -1.2902151   | -0.52247804  |
| C33 H44 O2 S3                           | -0.69098973 | -0.5295145  | -1.5647521   | 2.4806046    |
| C27 H33 N5 O2                           | -2.6873767  | -0.43004328 | -1.9420924   | 1.6762724    |
| C11 H21 N O4                            | 0.35463363  | 1.2372783   | -0.56311464  | 1.6644078    |
| XANTHOSINE (CAS# 146-80-5); (M+H)+      | 0.5693944   | 1.8235838   | -1.7599267   | 1.2719653    |
| C22 H25 N4 O2 P3                        | -1.7845329  | -0.47684512 | -0.60096556  | -1.2278816   |
| C15 H20 O4                              | -1.2848021  | 0.34222728  | 0.051127367  | 0.6478447    |
| C19 H44 N4 S2                           | -2.5818446  | 1.5095164   | -0.80024195  | 0.41746026   |
| C27 H50 N O4 P S                        | -1.3634415  | 3.07518     | -1.5152714   | 0.6247584    |
| C16 H14 N2 O4 S2                        | -2.1260589  | -0.4010983  | 0.69945896   | -2.236611    |
| C31 H39 O2 P5 S                         | -3.2798429  | -0.6123199  | -0.23776561  | 0.5728971    |
| C23 H28 O3                              | -1.1875893  | 0.32382485  | -0.181075    | -0.2032182   |
| C15 H20 O3                              | -2.1084585  | -0.8934052  | 1.2067223    | 0.6846894    |
| C18 H39 N O3                            | -0.79396    | -1.7999752  | -0.34364468  | 0.81750447   |
| C31 H52 O2 P4                           | -1.872562   | -3.3209677  | -0.8438075   | 0.14631023   |
| C11 H15 N O3                            | -3.3402073  | 0.05524803  | 1.3920562    | -1.6038486   |
| C12 H24 N2 O3                           | -1.4156773  | 2.6835446   | -0.50119513  | -0.5210086   |
| C11 H33 Cl N10 O                        | -0.14473605 | 1.0667293   | 0.88681495   | 1.449045     |
| C41 H69 Cl N O4 P S                     | -1.2173558  | -1.245638   | -0.7123915   | -0.24698922  |
| C9 H17 N2 O3 P                          | 0.1527536   | -0.9756197  | 0.05625136   | -0.04384329  |
| C24 H48 N3 O11 P                        | -2.8135076  | 1.7517741   | 1.3918991    | -1.4843936   |
| C11 H20 N4 O3                           | -1.9097579  | 0.15401979  | 0.2433273    | -0.3505216   |
| C25 H26 N12                             | -1.4895638  | -2.3532188  | -0.3146832   | 0.72809356   |
| C32 H48 N2 O4 P2                        | -0.3152967  | -3.4775326  | -0.6716405   | -0.05226709  |
| C30 H38 N6 O6                           | -2.217404   | -1.6959329  | -0.26365936  | 0.42705804   |
| C14 H22 N2 O2                           | -2.9781218  | -0.40678203 | 2.5125046    | -0.8289071   |
| C14 H22 N2 O3                           | -0.7763522  | 0.5676595   | 0.083179474  | -0.29929233  |

|                                                             |             |             |              |              |
|-------------------------------------------------------------|-------------|-------------|--------------|--------------|
| C24 H27 N5 O2                                               | -2.569183   | -1.0259805  | -1.1560919   | 0.02097787   |
| C38 H45 N P2                                                | 0.41074485  | -0.0741137  | -1.2635521   | 1.6554695    |
| C10 H10 N8                                                  | -1.3801056  | -1.0778587  | -0.030124873 | 0.2659476    |
| C34 H40 N6 O S2                                             | 0.6212681   | -0.6253468  | -0.26243016  | 1.2133362    |
| C9 H8 O3                                                    | -2.3081973  | 1.6398762   | 0.3316581    | -0.60779923  |
| C9 H8 O2                                                    | -3.2516687  | -0.48286426 | -0.33203435  | -1.0087023   |
| C32 H67 O5 P S3                                             | 0.8403674   | -0.96592367 | 0.7793864    | 0.49936825   |
| C10 H19 N7 O                                                | -2.5631657  | -0.19270962 | -0.077308714 | 1.0182031    |
| C22 H26 N O P                                               | -0.6273321  | 0.27898994  | 0.601552     | -1.4613223   |
| C13 H31 N7                                                  | -1.7861114  | -0.37457713 | 1.9300246    | -0.91676635  |
| METHIONINE (CAS# 63-68-3); (M+H)+                           | 0.39339742  | 1.7002417   | -0.014037641 | 0.5661249    |
| C28 H44 O4                                                  | -0.9457129  | -3.8322854  | -0.88295823  | 0.22819833   |
| C20 H39 N O2 P2                                             | -3.8927822  | -0.7983079  | 0.056466836  | -0.37344325  |
| C12 H29 N4 O3 P                                             | -2.4048326  | -1.201638   | 1.2923999    | 1.1738257    |
| C24 H32 O3 P6                                               | -2.9286754  | -2.6074295  | 0.2311258    | -0.60867316  |
| C38 H49 N5 P2 S2                                            | -1.1910388  | 0.7905516   | 0.6776308    | 0.49557638   |
| C11 H21 Cl N4 O3 S3                                         | -2.78245    | -0.87357944 | 1.1033089    | -0.5571558   |
| C16 H20 P2                                                  | -2.8303294  | -0.02361992 | -2.2925568   | 0.93575746   |
| 1-AMINOCYCLOPROPANE-1-CARBOXYLATE (CAS# 22059-21-8); (M+H)+ | -0.18683308 | 1.4025908   | 0.17046556   | -0.23272222  |
| C26 H37 N12 O P                                             | -0.7709343  | -3.8845398  | -0.8397014   | 0.3643929    |
| C26 H52 N2 S3                                               | -0.46155572 | 0.6959591   | -1.194835    | 1.9812045    |
| C4 H4 N4 O3 S                                               | -1.6650536  | 1.1359941   | -0.29450256  | -0.4357684   |
| C11 H14 N6 O                                                | 2.0374207   | 1.3794377   | 1.4729135    | 0.70738274   |
| C41 H62 N5 O P S                                            | -1.620256   | 2.3118987   | 0.058413923  | 1.1651245    |
| C21 H40 N2 O2 S                                             | -0.915529   | -0.08301538 | -2.0771165   | 1.9053531    |
| C18 H26 N6                                                  | -2.4745262  | 1.3081623   | -0.096214674 | -0.2244426   |
| C32 H40 Cl N3                                               | -3.4147706  | -0.8438026  | 0.36777842   | 0.33062238   |
| C34 H43 N4 O3 P                                             | 0.08314637  | -3.4359403  | -1.2496223   | -0.948853    |
| C18 H37 N9 O S                                              | -1.7449074  | -0.4141979  | 0.26848263   | -1.2678397   |
| C20 H30 N8 O P4                                             | -0.65903413 | -1.9273384  | 0.69745815   | 1.4735435    |
| C30 H61 N4 O3 P S                                           | -1.9585905  | 0.022175506 | 1.5755622    | 1.335317     |
| C21 H43 N4 P S                                              | 1.6904793   | -1.552038   | 0.28185385   | 1.5812641    |
| C17 H25 N12 P                                               | 0.29292172  | -0.62832433 | -0.4267869   | 1.8672929    |
| C15 H19 N7 O2 S3                                            | -2.4536922  | 1.0608481   | 0.41788608   | -0.17857379  |
| C24 H28 O3                                                  | -1.788072   | -0.28276846 | -0.6920932   | 0.14021924   |
| C24 H28 O2                                                  | -1.7322998  | -0.59460455 | 0.09009376   | 0.2725147    |
| LEUCINE (CAS# 328-39-2); (M+Na)+                            | -1.4444165  | -0.38930625 | -1.2948031   | 0.02162695   |
| C12 H30 N2 O4 S2                                            | 2.8624387   | -0.69142425 | -0.056247517 | -0.27241585  |
| C9 H10                                                      | -2.8066947  | -1.7445331  | -0.54219306  | -0.815472    |
| C28 H52 N3 P S3                                             | -2.0458956  | 0.33511603  | 0.07217221   | -0.11774642  |
| C29 H49 N4 O P S3                                           | 1.1482825   | -1.7873992  | 0.43348235   | -0.15745291  |
| C26 H54 N6 O S2                                             | -1.8639265  | 0.78943545  | -1.0771527   | 1.4792682    |
| C30 H44 N4 O11                                              | 2.207239    | 1.5924603   | -0.8796319   | -0.619435    |
| C21 H30 O5                                                  | -0.8647858  | -0.37023312 | 0.64123833   | -1.3708183   |
| C29 H58 N2 O S3                                             | 1.2313832   | -1.5761112  | -0.18502611  | 1.8582547    |
| C21 H30 O3                                                  | -0.966231   | 1.6194232   | -1.3435256   | 1.34384      |
| C8 H6                                                       | -2.7115002  | -0.30883497 | -0.22211505  | -0.7482686   |
| C7 H14 P2                                                   | -3.161009   | -1.2522731  | -0.74292105  | 0.06797283   |
| C29 H61 N O P2 S3                                           | -1.5305443  | -0.09472809 | -0.9041861   | -0.023290493 |
| C10 H17 N7 O                                                | -2.603875   | 0.81531596  | 1.2503074    | 0.430794     |
| C16 H28 N6 O2                                               | -1.8889366  | 1.1345959   | -2.2213817   | 1.4976355    |
| THEOBROMINE (CAS# 83-67-0); (M+H)+                          | -0.9467404  | 0.35950112  | 0.10052814   | -1.0745842   |
| C30 H62 N6 O3 S2                                            | -2.2078123  | 1.1161628   | -0.8375847   | 1.010348     |
| C12 H22 O2 S3                                               | -1.6233032  | -3.4761684  | -0.8761188   | 0.5072347    |
| C18 H15 O P                                                 | -2.2272055  | -1.0909793  | 0.3069124    | -2.279276    |
| C18 H33 N3 O3                                               | -1.3898236  | 0.18224819  | -1.4697437   | 1.2023038    |
| C45 H61 N O3 S2                                             | -0.16637176 | -0.4294921  | -0.074697554 | 0.22208619   |
| C31 H64 N6 O4 S2                                            | -3.2963057  | 0.805253    | 0.96840274   | 1.6004059    |
| C14 H30 O2 P2                                               | -2.4089208  | 2.089634    | 0.21851227   | 0.12945601   |
| C20 H34 N2 S3                                               | 0.6951906   | 0.64246607  | 0.67265195   | 1.6268091    |
| C22 H44 N6 O11                                              | -4.0175004  | -0.10673125 | -0.3018859   | -0.30213764  |
| C12 H19 N O2 S2                                             | -2.0526128  | -0.14322022 | 1.7974864    | 0.80446297   |
| C34 H52 O3 P4                                               | -0.9692929  | -3.6680236  | -1.0741669   | 0.3207746    |
| C11 H22 N2 O3                                               | -1.9285351  | 2.3921406   | 0.008385062  | -0.354084    |
| C21 H34 O6                                                  | -1.879443   | -0.76146907 | 0.021656195  | -0.48260945  |
| C11 H28 N5 O3 P                                             | -0.63308096 | -0.9155462  | 0.4153787    | -1.248221    |
| C25 H55 N5 O3 P2 S2                                         | -1.9203286  | 0.21114072  | 0.4140254    | -0.84157413  |
| C20 H26 O3 P2                                               | -2.4961576  | -1.536549   | 1.0134574    | 0.711536     |
| PALMITOYL-CARNITINE (CAS# 2364-67-2); (M+H)+                | -2.3083832  | 0.49806675  | 0.105006814  | -0.18443897  |
| C10 H12 N2 O3                                               | -2.5707867  | -0.846345   | -0.8782654   | -1.0373552   |
| C6 H10 N6 O                                                 | 0.2754684   | 0.05525829  | -1.4007286   | 1.331529     |
| CIS-ZEATIN (CAS# 1637-39-4); (M+H)+                         | -0.4201027  | -3.9006648  | -0.9105878   | 0.42689693   |
| GLUTATHIONE (CAS# 27025-41-8); (M+H)+                       | -0.5793206  | -0.05154653 | -0.95783395  | -1.8208103   |
| C29 H50 N7 P S2                                             | -1.5561215  | 0.6503134   | -1.3932365   | 0.22404402   |
| AZELAIC ACID (CAS# 123-99-9); (M+Na)+                       | -3.1299403  | 0.81008613  | -1.4422836   | -1.4165155   |
| C17 H35 N4 O3 P                                             | -1.1180226  | 0.88309586  | -1.7002059   | 2.4426382    |
| C24 H33 N4 P                                                | -0.25362027 | -2.6761765  | -0.12945026  | -0.45344973  |
| C23 H29 N11                                                 | -0.826315   | 1.3887455   | -0.7382666   | -1.1302816   |
| C21 H20 N8 P4                                               | -0.81995714 | -0.9678023  | -0.11490905  | -0.4439449   |
| NORLEUCINE (CAS# 327-57-1); (M+H)+                          | 1.0404081   | 0.9623961   | -0.5133288   | 1.5111212    |
| 4-ACETAMIDO-BUTANOATE (CAS# 3025-96-5); (M+Na)+             | -2.4631655  | -1.1882318  | 0.21306837   | -0.13937147  |
| C11 H12 N6                                                  | -2.9822955  | -0.40019894 | 1.7200354    | -0.34629804  |
| C24 H49 N4 O P S                                            | -3.3523226  | 1.6320684   | 0.17529792   | 1.0687658    |
| C14 H33 N4 O2 P                                             | -3.4017413  | -0.53856635 | -0.57567555  | 0.27728158   |
| C25 H54 N4 O2 S2                                            | -3.271101   | 1.7340217   | -0.4549206   | 0.32021484   |
| C12 H26 O7                                                  | -3.8268924  | -0.8478243  | -0.21607164  | -0.3024776   |
| C17 H37 N O3                                                | -2.732467   | -1.0837011  | -0.32149985  | -0.74921656  |
| C17 H37 N O2                                                | -0.80330515 | -0.9402544  | 0.29374582   | -1.9303854   |
| C13 H18 O2                                                  | 0.52069646  | -0.19092578 | 0.59810627   | -1.5705454   |
| C16 H22 N2 P2 S                                             | -1.8350623  | 0.40450373  | -2.8569293   | -1.1447672   |
| C25 H45 N O4                                                | -1.4635088  | 3.1497617   | -1.3230102   | 0.8263296    |
| C25 H45 N O8                                                | 0.18014513  | 0.41581666  | 0.13475657   | -2.0159664   |
| C23 H25 N5 O2                                               | -2.7797492  | -2.2771661  | 0.85691583   | -0.3147609   |
| C17 H18 N6 O3                                               | 1.6009111   | 0.21947986  | 0.9603101    | -0.3057463   |
| C5 H4 O4 P2                                                 | 0.8226571   | 1.6412295   | -2.0452955   | -0.002666593 |
| C30 H45 N5 O7 S2                                            | 0.2809836   | 2.5823164   | -0.9093129   | 0.966123     |
| ISOLEUCINE (CAS# 73-32-5); (M+H)+                           | 0.9349172   | 1.4446275   | 0.14903757   | 1.4926987    |
| C24 H36 O5                                                  | -0.27926755 | -0.64663804 | -2.6511507   | -0.82587695  |
| GLUTAMATE (CAS# 56-86-0); (M+H)+[-H2O]                      | 0.56274635  | 1.0588931   | -1.0864909   | 0.001961008  |
| ASCORBATE (CAS# 50-81-7); (M+H)+[-H2O]                      | -2.9173715  | -0.21005988 | 0.4337232    | 0.43063426   |
| C25 H39 N O6 S2                                             | -2.059012   | -1.7253608  | 2.1965508    | 0.1383245    |
| C18 H41 Cl N6 O S                                           | 0.22006708  | -0.69259465 | -1.0952579   | 1.5801868    |
| C34 H68 N2 S                                                | 0.33676127  | 0.8299302   | -0.85166854  | -0.9744285   |
| C21 H30 S2                                                  | -2.5498548  | -1.0395691  | 1.0600046    | 0.001785696  |
| INOSINE (CAS# 58-63-9); (M+H)+                              | -2.5350058  | 1.755865    | 0.6250512    | -0.47881138  |
| C37 H45 O3 P S                                              | 0.35526836  | 1.120194    | -0.6102664   | 0.35236308   |
| C10 H13 N                                                   | -3.0214548  | -1.3294933  | 1.2575492    | -1.2440262   |
| C31 H56 N2 O P6                                             | 2.2066207   | 1.5929185   | -0.8946528   | -0.6174226   |
| C19 H22 N6 O2                                               | -1.5113672  | -0.5802331  | -0.27376142  | 0.2257811    |
| C28 H59 N P2 S3                                             | -2.1608481  | 0.8317865   | -0.015097857 | 0.5091136    |
| C23 H45 N2 O3 P S                                           | -2.4579387  | 1.6133301   | -0.95880544  | 0.40847474   |
| C29 H55 N3 O3 S3                                            | -1.1232305  | 0.39993262  | -0.95062006  | 2.0266302    |
| C9 H17 N6 O P                                               | -1.7250009  | 0.3625476   | 1.6732081    | 0.2988295    |
| C11 H19 P3                                                  | -3.3454404  | 1.558203    | 0.5880763    | 0.20506614   |
| C26 H47 N6 O4 P S                                           | -0.9153549  | -3.875309   | -0.431529    | 0.39789674   |
| C5 H10 N4 O2                                                | -1.4204123  | -0.15839247 | -0.02418144  | -1.1528546   |
| C12 H22 N8                                                  | -2.4051878  | 1.8015163   | 1.5759989    | 0.61454135   |
| C28 H47 N4 P S                                              | 0.45753914  | -3.8859985  | -0.6023104   | -0.054563403 |
| CAFFEINE (CAS# 58-08-2); (M+Na)+                            | -1.7747911  | 0.72083783  | 0.068304434  | 1.366834     |
| C26 H42 N6 O4                                               | 0.52323896  | -3.8589365  | -0.91144186  | 0.3780163    |
| C24 H49 N5 O5 S3                                            | 0.85156685  | 0.28283107  | -1.2518072   | 0.8388003    |
| C32 H50 N10 O4                                              | -1.9256002  | -0.77536416 | -2.9935637   | 0.55131745   |
| C26 H42 N6 O5                                               | -0.22092357 | -3.9160583  | -0.92101604  | 0.35505745   |
| C24 H47 N4 O2 P S                                           | -3.6115005  | 0.9015045   | 0.23518114   | -0.26053602  |
| DEBRISOQUIN (CAS# 581-88-4); (M+H)+                         | 0.9159082   | 0.2123944   | 0.13889118   | 0.3559305    |
| C17 H23 Cl O                                                | -2.1015012  | 0.9003232   | -1.9405293   | -0.92224526  |
| C32 H36 N8 O3                                               | -1.0326775  | -2.6388087  | -1.2173208   | 1.5747638    |
| 5'-METHYLTHIOADENOSINE (CAS# 2457-80-9); (M+Na)+            | 0.9873009   | 0.78674877  | -0.0767608   | 0.5151356    |
| C19 H40 O2 S                                                | -0.9320564  | 1.1703225   | 0.1166603    | 0.83229536   |

|                                                         |              |              |              |              |
|---------------------------------------------------------|--------------|--------------|--------------|--------------|
| C18 H32 N6 O3                                           | -1.0421462   | 0.27779284   | -1.5605522   | 0.33721638   |
| C18 H39 O7 P                                            | 0.9000418    | 2.2117705    | -0.70227     | 0.50629723   |
| C8 H12 O S3                                             | 0.63958657   | 0.9185847    | -0.91437536  | -0.46819395  |
| C10 H17 N2 O2 P                                         | -3.6344306   | 0.38425463   | 0.8077787    | 1.1033921    |
| C10 H21 N6 P                                            | -1.9915897   | 0.31568348   | 0.86835396   | -1.7025832   |
| PIPECOLATE (CAS# 535-75-1); (M+H)+                      | 0.020270104  | 2.0813816    | -1.1817509   | -0.9992457   |
| C27 H57 N O2                                            | -1.3305688   | -1.4377587   | -0.023987733 | -1.33011     |
| C26 H37 N O6                                            | -2.688886    | -1.6709335   | -0.02198276  | -1.1029866   |
| C13 H24 N2 O4                                           | -3.7947245   | 0.05881849   | 0.40113842   | 0.17862675   |
| C31 H63 N4 O10 P                                        | -2.0524595   | -0.9271771   | -2.9519703   | 0.33988956   |
| C32 H37 N2 O P                                          | -0.31341884  | 0.51340747   | 0.21848918   | 0.28110808   |
| C22 H46 N O7 P                                          | -2.6760228   | 2.87958      | -0.15487677  | 0.38421327   |
| C16 H36 N2 O2 S2                                        | -2.1878152   | 0.97456753   | -0.6659534   | -0.072297096 |
| 3'-CMP (CAS# 63-37-6); (M+H)+                           | -0.800255    | 1.3853083    | -0.91564757  | 0.013159439  |
| C23 H30 N10 P6                                          | -2.465314    | 0.08979222   | -0.75536466  | 0.30899203   |
| C22 H46 N8 O S3                                         | -0.8032601   | -2.6048622   | -0.67647016  | -0.77277     |
| C11 H20 N2 O3                                           | -3.2444563   | 2.0066342    | -0.44166505  | -0.065648854 |
| C15 H18 N5 O2 P S3                                      | -3.1555371   | -0.94203424  | 0.10304649   | -0.3633859   |
| BETAINE (CAS# 107-43-7); (M+Na)+                        | 0.17615424   | -0.69782907  | 0.3230062    | -1.4677306   |
| C15 H33 Cl N4 O                                         | -1.9816093   | -1.1635113   | -0.6120607   | -1.290493    |
| C6 H11 N O                                              | -1.0402366   | -0.96091     | -1.4753895   | -0.64407456  |
| C26 H48 N2 O2 S3                                        | 0.18221232   | -3.0800796   | -0.52345765  | -0.5109757   |
| L-ARGININE-(GUANIDINEIMINO-15N2) [ISTD] (CAS# ); (M+H)+ | 2.455324     | -0.8164439   | 0.23420995   | 0.23392113   |
| C14 H32 N2 S2                                           | -3.1535602   | -0.066664726 | 0.4863919    | 2.1262956    |
| C14 H35 N7 O2                                           | -2.7975955   | 0.2591924    | 0.3843004    | -0.17077656  |
| C21 H33 N3 O3                                           | -2.1613255   | 0.6126399    | 1.1801457    | -1.8766453   |
| C21 H28 N10 P6                                          | 0.24761665   | -0.46458918  | -0.453092    | 0.683571     |
| C31 H38 O6 S                                            | 0.40431857   | -0.37620574  | -1.4180899   | 2.7914858    |
| C22 H43 N7 O4 S2                                        | -0.22204679  | -1.5132259   | -0.79459643  | 0.6443212    |
| C8 H19 N                                                | 1.5068749    | 0.63243365   | -0.27610946  | 0.7370734    |
| CMP (CAS# 63-37-6); (M+H)+                              | -1.6521672   | 0.16065486   | 0.10496664   | 1.009805     |
| C12 H18 O3                                              | -1.3902559   | -3.511129    | -0.87153786  | 0.57382864   |
| C24 H10 N2 O4                                           | -0.8926612   | -3.3410938   | -1.3214732   | 0.5922127    |
| C16 H32 N8 S5                                           | -2.9509618   | -1.3447529   | 0.17114234   | 0.20781523   |
| C20 H16 N4 O                                            | -1.6660924   | -3.0784311   | -1.321156    | 0.57912016   |
| C30 H58 Cl N2 O3 P                                      | -0.899711    | 0.8736598    | -0.03450544  | -0.3017166   |
| C9 H17 N O2                                             | -1.5948788   | -0.42260742  | 0.25795537   | -0.22345376  |
| ISOLEUCINE (CAS# 73-32-5); (M+Na)+                      | -0.6322275   | 0.2908464    | -1.2654359   | -0.54647386  |
| C9 H17 N O4                                             | -1.4700621   | 2.240821     | -0.7529726   | 0.5174755    |
| C17 H19 P S2                                            | -0.8496146   | -1.2875836   | 1.933502     | 0.5831768    |
| C9 H18 N2 O3                                            | -0.88311327  | 1.2579893    | -1.3701508   | -0.41679347  |
| C22 H34 N2 O P2 S                                       | -2.1804414   | 0.55784124   | -1.9876138   | -1.1000556   |
| C25 H34 O3 P2                                           | 2.6306808    | 0.16653825   | -0.38697064  | 0.73470086   |
| C30 H61 N4 O4 P S                                       | -3.3451693   | 1.0727993    | 0.65575397   | 1.4803919    |
| C29 H60 N11 O2 P3                                       | -0.81063306  | 1.3885523    | -0.4517434   | -0.48169512  |
| C19 H23 P                                               | -0.004701974 | -0.50477993  | -0.7715693   | 2.1119483    |
| C15 H29 P S                                             | 1.672865     | -1.3149023   | 2.0235431    | 0.9704685    |
| C30 H50 N7 O2 P S2                                      | -1.5262157   | 0.9418884    | -1.1678815   | 0.011010855  |
| C39 H37 N3 O2                                           | -0.00337281  | 0.66429037   | 0.357515     | 0.32037103   |
| C26 H52 N3 O11 P                                        | -0.89842176  | 2.3310246    | 0.13046044   | 1.8557563    |
| C19 H35 O P S                                           | -2.812059    | 2.246336     | -0.40005866  | 0.2544191    |
| C10 H21 N4 O3 P                                         | 0.70400697   | -1.344861    | -0.8492375   | 0.8301645    |
| C17 H34 N6 O S2                                         | -3.0119808   | 1.3759003    | -0.5132402   | -0.4653518   |
| C21 H29 O4 P                                            | -0.46729064  | -0.24698038  | 0.5301953    | -0.8735655   |
| C37 H34 N O P                                           | -1.7595633   | 0.44970414   | 0.9144659    | -0.48334116  |
| SUBERIC ACID (CAS# 505-48-6); (M+Na)+                   | -2.3372936   | 0.24483895   | -0.60351133  | -0.54602313  |
| C13 H24 N6 O2                                           | -2.565735    | 0.2345376    | -1.0955749   | -0.36115986  |
| C16 H39 N7                                              | -2.977581    | -1.1020622   | 0.3820385    | -0.6685385   |
| C10 H14 N2 O2                                           | -2.8630767   | -0.41943976  | 1.0489948    | 0.21649265   |
| C13 H24 N6 O3                                           | -1.2227757   | -0.8956388   | 0.26569265   | 0.50700444   |
| C22 H46 N2 O P2 S                                       | -0.37526888  | -0.6224128   | -2.8084404   | -1.2218671   |
| C11 H21 N7                                              | -2.1817799   | -0.038139343 | -0.19885612  | 1.260706     |
| C14 H33 N7                                              | -1.7714157   | 0.3726176    | -0.094569504 | -1.1385244   |
| C17 H33 N2 O P S2                                       | -0.66518176  | -0.8270929   | -0.99747974  | 0.1718282    |
| PANTOTHENATE (CAS# 79-83-4); (M+H)+                     | -1.6983728   | 0.5888702    | -0.14895846  | 0.060058296  |
| C26 H40 S                                               | -3.0164807   | 1.6316212    | 0.25449747   | 0.95056695   |
| C5 H7 N O3                                              | -1.9166262   | 0.36456174   | 1.4787228    | 1.1904776    |
| C4 H9 O2 P                                              | -1.4160053   | 0.56677324   | 1.1411588    | -1.3797493   |
| QUINOLIN-2-OL (CAS# 59-31-4); (M+Na)+                   | -2.3281374   | -0.5223669   | -1.0092891   | 1.0219636    |
| C20 H29 N4 O5 P                                         | -0.28090334  | 0.59043944   | -2.9899757   | -0.57850087  |
| C25 H26 N4 O2                                           | -2.8149436   | -0.84862053  | -1.832703    | 0.14682889   |
| C14 H27 N4 P3                                           | -1.449138    | -0.9307176   | -2.184616    | -0.07811267  |
| C12 H11 N9 O                                            | -1.8634112   | 2.9373853    | -0.8023087   | 0.001104772  |
| C20 H35 N4 P3                                           | -0.3360408   | -0.29040676  | 0.66372657   | 2.8554215    |
| C15 H31 N4 O2 P                                         | -0.6221055   | 0.5516157    | -1.5241657   | 2.5978038    |
| C15 H15 N3 O S                                          | -0.18015173  | 0.11000836   | -1.4114119   | 0.200831     |
| PHENYLALANINE (CAS# 63-91-2); (M+H)+                    | -3.47659     | 1.6337947    | 0.1053538    | -0.93130374  |
| C14 H27 N7 O                                            | -2.283327    | 0.1419703    | 0.33421814   | 1.0528297    |
| L-HISTIDINE (CAS# 71-00-1); (M+H)+                      | 0.535075     | -0.79187787  | 0.6550308    | 0.14525077   |
| C34 H68 N2 O9 S2                                        | 0.14085308   | -0.3079712   | -3.4921167   | -0.87787634  |
| C36 H66 N O P                                           | -2.9102216   | 1.2615827    | -0.7432839   | 0.049583733  |
| C39 H48 O2 P4                                           | -2.5140915   | -0.07350227  | -0.98119676  | -0.015322149 |
| C27 H51 O4 P S2                                         | 1.4660705    | -3.5059004   | -0.4183405   | -0.08587012  |
| C29 H32 N18 P2                                          | -0.17558366  | -3.3436742   | -1.7797967   | 0.13272539   |
| C25 H53 N O2                                            | -2.6074934   | 0.1025264    | 1.7483596    | -0.4909326   |
| C50 H93 N3                                              | -0.51051056  | -0.74196273  | -0.29819965  | -1.9893136   |
| C30 H59 N O4 S5                                         | -2.8096802   | -0.28160182  | -0.3038973   | 0.31222567   |
| C16 H24 N6                                              | -2.291918    | -0.44818506  | 0.90627927   | 0.023580372  |
| 16:0 LYSO PC (CAS# 17364-16-8); (M+Na)+                 | -3.1719608   | 1.6643655    | 1.2767842    | -1.114255    |
| C26 H50 N3 O11 P                                        | -2.145818    | 2.9821892    | -0.26768672  | -0.6194793   |
| C17 H22 N10 P2                                          | -1.7350199   | -0.32104635  | -0.38529387  | 1.5623258    |
| C6 H4 O                                                 | -2.862411    | -0.84616905  | 1.0480105    | -0.559262    |
| C23 H41 N                                               | -0.9276067   | 1.0527897    | -3.3050396   | -0.47811922  |
| C13 H25 N O2                                            | -1.9377297   | 0.37788555   | 0.4373712    | 1.2103382    |
| C15 H19 N4 O3 P                                         | 1.2445924    | 1.5317042    | -1.0503185   | 1.5571406    |
| C24 H54 N12 S2                                          | -2.4477189   | 0.3108641    | 0.47011635   | 0.6990042    |
| C13 H25 N O4                                            | -2.3848212   | 0.13015506   | 0.80546355   | -0.72080135  |
| C13 H25 N O3                                            | -3.8153675   | 1.0531999    | -0.335806    | 0.55016166   |
| C25 H51 N5 O10 S                                        | -0.4125616   | 1.6652141    | -0.32186195  | 2.2270908    |
| C27 H41 N5                                              | -0.1765033   | 0.50431097   | -0.2588837   | 0.7250476    |
| C19 H41 N3 O3                                           | -0.21193415  | -0.310225    | -0.45329502  | 1.4201757    |
| C17 H33 O2 P S2                                         | 0.8623839    | 0.9109814    | -0.04936862  | 0.7632493    |
| C13 H25 N7                                              | -1.8187919   | 0.01670222   | -1.4561292   | 1.1435982    |
| C9 H24 N4 O2                                            | -0.14215603  | 0.1888665    | 0.07217372   | 0.6151617    |
| C22 H29 N3 O2                                           | -2.384029    | -0.40573943  | -0.35983124  | -1.3595994   |
| C26 H58 N4 O2 S2                                        | -2.8838975   | 1.2346417    | 0.3855582    | 0.91291225   |
| C32 H65 N4 O4 P S                                       | -2.1897807   | 0.5465899    | 1.5819854    | 1.4987729    |
| C29 H15 N8 O2 P                                         | -1.3228158   | -1.5502125   | 0.93104404   | 0.44416627   |
| C31 H43 N3 O3 S                                         | 1.2703378    | 0.6481671    | -2.4226532   | -0.06282191  |
| O-ACETYLCARNITINE (CAS# 461-77-8); (M+H)+               | -1.9016253   | 1.7323239    | -0.34413695  | 0.32612163   |
| C16 H37 N7                                              | -3.5521493   | -0.65984666  | 1.6952922    | -0.75136405  |
| C36 H66 N6 O4 P2                                        | 0.5407739    | 1.9235818    | -0.34100312  | 1.5942875    |
| C19 H41 N3 O5                                           | -3.2433107   | -0.021940462 | 0.49688154   | -0.017239347 |
| C8 H14 N2 O3                                            | -2.1494737   | 2.0360065    | -0.27266398  | 1.6424339    |
| C30 H33 N7 O2                                           | -2.7778862   | 1.2456592    | 0.6974162    | -1.0813364   |
| C28 H53 N5 O5 S3                                        | -1.3092748   | 0.91677123   | -0.6819412   | -1.0493118   |
| C6 H15 N3 O2                                            | -1.1118852   | 0.79566646   | 0.9538605    | -1.9947717   |
| C33 H27 N7 O2 P2                                        | -2.4883726   | 1.0062563    | -0.26818478  | -1.1441529   |
| C31 H37 N9 O6                                           | -0.77764595  | -0.42948803  | 1.2877584    | 1.1042563    |
| C19 H41 N                                               | -2.909659    | 0.654234     | -0.8644799   | 0.8841508    |
| C26 H55 N O2                                            | -2.907174    | -0.24001545  | 1.689203     | -0.57549775  |
| C19 H21 N9                                              | -1.6176797   | 0.38296217   | -0.12459368  | -0.22165361  |
| C17 H38 N2 S2                                           | 0.90069944   | -0.25480807  | 0.5686795    | 1.2617636    |
| SERINE (CAS# 56-45-1); (M+H)+                           | -0.7678914   | 0.63687336   | 0.11695189   | 0.73615736   |
| C21 H34 S5                                              | -1.7127398   | -0.16253382  | 0.97692555   | -0.41466036  |
| C35 H60 S3                                              | 1.18297      | 1.5417689    | -1.0611129   | 1.7368314    |
| C31 H68 N12 O4 S2                                       | -3.45781     | 0.7120056    | 0.4453294    | 1.6488909    |
| C14 H30 O8                                              | -3.8241472   | -0.84312403  | 0.09045547   | -0.32810897  |
| C14 H34 N2 S2                                           | 0.534711     | 0.87463343   | 0.68519163   | -1.1509943   |

|                                                          |              |              |              |              |
|----------------------------------------------------------|--------------|--------------|--------------|--------------|
| C25 H56 N12 P2 S                                         | -2.1143537   | 0.02245161   | -0.021685451 | -0.90621895  |
| TAURINE (CAS# 107-35-7); (M+H)+                          | 0.76844406   | 0.47388414   | 1.0040014    | 0.39297175   |
| C19 H28 N6 O                                             | -1.6187874   | -0.6070419   | 1.1022297    | -0.5827672   |
| C20 H45 N3 S2                                            | -0.2822333   | 1.5939156    | 0.9308505    | 0.48558742   |
| C4 H11 N                                                 | -2.780722    | -1.7659676   | 0.72089547   | -1.1499754   |
| C42 H86 N2                                               | 1.1800228    | -0.3466407   | -0.26359123  | 0.14799711   |
| N-ACETYL-L-ALANINE (CAS# 97-69-8); (M+Na)+               | -1.6347704   | 2.2952836    | -0.79736954  | 0.14185011   |
| C32 H8 N2 O P6 S3                                        | 0.06538431   | -0.4090121   | -0.18010804  | -2.3882694   |
| ACETYLCHOLINE (CAS# 51-84-3); M+                         | -0.8655904   | 1.7714357    | -1.6501684   | -0.85534865  |
| C19 H27 N3 O P2                                          | -0.5269767   | 0.2573803    | 0.49181807   | -0.07394842  |
| CORTISOL (CAS# 50-23-7); (M+Na)+                         | -0.6662936   | 0.044468783  | 0.3758621    | 0.047200523  |
| C33 H50 N5 O3 P5                                         | -0.92209965  | 0.81498045   | -1.1711361   | 1.4879258    |
| C38 H82 N6 P2                                            | 0.122279406  | -0.62248033  | -0.48856646  | -0.9578908   |
| C21 H32 N6 O2                                            | -2.1526122   | 0.29305547   | -0.19093189  | 0.17249721   |
| LL-2,6-DIAMINOHEPTANEDIOATE (CAS# 583-93-7); (M+H)+[H2O] | -0.31178278  | 0.8098593    | -0.38024768  | -0.48301673  |
| C9 H15 O P S                                             | -2.1166484   | 0.84750724   | 0.018924996  | -0.044335186 |
| C16 H20 O                                                | -1.371158    | -0.52811515  | 2.311214     | 0.34410638   |
| C43 H83 P                                                | -1.5291489   | 0.2537691    | -1.0262668   | -1.5384846   |
| C20 H36 N2 S                                             | -0.8420156   | 0.2553447    | 0.6973457    | 0.2990107    |
| C12 H16 O4                                               | -0.69368345  | -1.0567733   | 1.3245394    | 1.0393218    |
| C13 H18 O3 S                                             | -1.7595942   | -0.33174354  | 0.47004682   | -0.23983082  |
| C19 H36 S5                                               | 0.6685475    | 0.36934212   | -1.3506957   | -1.4899983   |
| C41 H45 N7 S                                             | 1.9303429    | 1.8148142    | -1.1541102   | -0.5197281   |
| C23 H39 O7 P                                             | -1.0706313   | 0.5452222    | 0.5277791    | -0.12613921  |
| C16 H30 O2 P2                                            | -2.01192     | -1.015799    | 0.32191992   | 0.24304107   |
| C15 H24 N2 O3                                            | -3.2572901   | 0.60805315   | 1.1614771    | -1.1466576   |
| BETAINE (CAS# 107-43-7); (M+H)+                          | -0.37598276  | 2.4193182    | -1.0862541   | 0.7661112    |
| C21 H39 N3 S                                             | -2.04E-04    | 0.21904132   | -0.33056733  | 2.1596715    |
| SPHINGANINE (CAS# 764-22-7); (M+H)+                      | -1.003644    | -0.422272    | -0.97796655  | 1.2873054    |
| C20 H46 N4 O P2                                          | -0.6178836   | -0.81665003  | -0.23142417  | -0.011427254 |
| C37 H52 S3                                               | -0.53668475  | -0.7697058   | -0.5922158   | 0.1915589    |
| C6 H14 O3                                                | 0.76897144   | -2.1254287   | -0.9142275   | 1.1650923    |
| C40 H86 N2 O4                                            | 0.08853406   | -0.5266889   | 0.45573092   | -0.09168099  |
| C47 H37 N O3 S                                           | -2.357916    | -0.70370317  | 0.4800816    | 0.22379391   |
| C18 H32 O2                                               | -0.13532886  | -0.48710632  | 0.20809129   | 0.029394746  |
| C22 H36 N P                                              | -1.7811922   | -0.27337602  | -0.4113684   | 1.6251421    |
| C17 H36 N6 O2 S                                          | -0.1828109   | 1.1894494    | -0.8047407   | 1.2260027    |
| C28 H48 N6 O S                                           | -2.2257326   | 1.035175     | 0.24311101   | 2.141442     |
| C26 H55 N5 S5                                            | -0.7487448   | 0.59391177   | -0.9878284   | 0.14912829   |
| C31 H66 N8 O2 S3                                         | -0.09545933  | -0.6142831   | -1.2322397   | 0.16917491   |
| C41 H82 O                                                | -0.3428986   | 1.5428442    | -1.08895     | -1.1072782   |
| C37 H80 N4 O2                                            | -0.47074848  | 0.59376884   | -1.0756961   | -1.6648291   |
| C43 H91 N2 P                                             | -1.7499524   | 1.7508134    | -0.12637375  | -1.3998361   |
| C28 H38 O6 P6                                            | -2.017348    | -0.5381319   | 0.62650526   | 0.151021     |
| C32 H2 O5 P2 S5                                          | 0.08294627   | 1.0633451    | -0.24891165  | 0.1991936    |
| C43 H90 N5 P                                             | -1.3191514   | 0.03184442   | 0.32445377   | -0.8037986   |
| C34 H64 N4 P2 S                                          | -1.9763083   | 0.78502464   | 0.24885064   | -0.6480430   |
| C6 H9 N O4 S                                             | -0.6582972   | 0.479218     | -1.6867607   | -0.38556182  |
| C30 H37 N13 O8 S                                         | -0.4048864   | -0.732766    | -0.7602055   | 0.6703085    |
| C13 H21 N O2                                             | -1.3177867   | -0.12827902  | 0.5718017    | -0.32219037  |
| C49 H101 N                                               | 0.6738378    | 0.09538162   | -1.734575    | -0.18994945  |
| C32 H54 N2 O3 P2 S                                       | -0.8700016   | 1.3289783    | -0.40891945  | 0.83614457   |
| L-CARNITINE (CAS# 541-15-1); (M+H)+                      | -0.48420376  | 0.19912083   | -0.921164    | -0.5743407   |
| C24 H37 N11 O5                                           | -0.63058674  | -0.4168931   | -0.68541354  | -1.5609187   |
| D-GALACTOSAMINE (CAS# 7535-00-4); (M+H)+[H2O]            | 0.56483096   | 0.14363825   | -1.0266951   | 0.48380283   |
| C25 H47 N3 O5 S                                          | -1.6242768   | 0.39577955   | -0.5330588   | 0.1585083    |
| C39 H47 N P2                                             | 0.18893452   | -1.4997265   | -0.5121084   | 1.6046941    |
| HOMOSERINE (CAS# 672-15-1); (M+Na)+                      | -0.009428233 | 0.6503602    | -1.2359178   | -1.0011944   |
| D-MANNOSAMINE (CAS# 14307-02-9); (M+H)+[H2O]             | 0.56483096   | 0.14363825   | -1.0266951   | 0.48380283   |
| N(PAI)-METHYL-L-HISTIDINE (CAS# 332-80-9); (M+H)+        | 0.56839526   | 0.6502844    | 0.12715934   | -0.25883344  |
| C23 H48 N O7 P                                           | 0.7589052    | 1.337892     | -0.79690266  | -0.998718    |
| C5 H5 N5 O                                               | 0.069346935  | 1.4159623    | -0.3799913   | 0.86852956   |
| C38 H47 N2 O8 P                                          | 0.9607913    | 0.44412968   | -1.7561116   | -0.09910063  |
| C14 H22 N2 O                                             | -0.56243527  | 0.56866944   | 0.21965945   | -1.0004287   |
| MELANIN (CAS# 8049-97-6); (M+H)+                         | -0.5513027   | -0.15168649  | -0.14979348  | 0.5496983    |
| BIS(2-ETHYLHEXYL)PHTHALATE (CAS# 117-81-7); (M+H)+       | 0.53341085   | 1.0396384    | -0.2806837   | 0.9324283    |
| C10 H15 N4 P                                             | -2.7237012   | 0.41507423   | -0.017599922 | -1.0249571   |
| VALINE (CAS# 72-18-4); (M+Na)+                           | -1.8509051   | -0.5131101   | 0.98530877   | -1.7584146   |
| C10 H18 N2 O                                             | -0.1903761   | 0.27304414   | 0.042691447  | 0.4995675    |
| TAURINE (CAS# 107-35-7); (M+K)+                          | -0.6062918   | -1.3427849   | -0.38771334  | -0.01004532  |
| C7 H13 N O2                                              | 0.25909254   | 1.0302854    | -0.6323632   | 1.8298174    |
| L-ALLOTHREONINE (CAS# 28954-12-3); (M+H)+                | 1.3134838    | 0.6000143    | -0.07406078  | -0.22656216  |
| HOMOSERINE (CAS# 672-15-1); (M+H)+                       | 1.3134838    | 0.6000143    | -0.07406078  | -0.22656216  |
| C40 H38 N5 P3                                            | -1.4764123   | 0.46536747   | 0.42611203   | 0.09916575   |
| GUANINE (CAS# 73-40-5); (M+H)+                           | -0.2487285   | 0.2070626    | -0.14342019  | -1.299055    |
| C5 H11 N O2 S                                            | 0.39013368   | 1.6998246    | -0.011307837 | 0.5661986    |
| C12 H18 N8                                               | -0.022234444 | -0.34453958  | 0.5037062    | 0.9398397    |
| C18 H33 N6 O2 P5                                         | -1.0346354   | 0.13746454   | 0.30472612   | -0.8208366   |
| TYROSINE (CAS# 60-18-4); (M+Na)+                         | -2.2257247   | -0.851846    | -0.33259523  | -0.83227634  |
| SUCROSE (CAS# 57-50-1); (M+Na)+                          | 0.85790384   | -0.09594981  | -2.0631404   | -0.29919556  |
| NORVALINE (CAS# 6600-40-4); (M+H)+                       | -1.170278    | 1.73229      | -0.38000676  | 0.03255901   |
| BETA-ALANINE (CAS# 107-95-9); (M+H)+                     | -0.5941436   | -0.059084453 | -1.5174391   | -0.4500078   |
| CELLOBIOSE (CAS# 528-50-7); (M+Na)+                      | 0.85790384   | -0.09594981  | -2.0631404   | -0.29919556  |
| MELIBIOSE (CAS# 585-99-9); (M+Na)+                       | 0.85790384   | -0.09594981  | -2.0631404   | -0.29919556  |
| VALINE (CAS# 72-18-4); (M+H)+                            | -1.1694851   | 1.7363962    | -0.37619135  | 0.034828518  |
| BETA-MALTOSE (CAS# 69-79-4); (M+Na)+                     | 0.85790384   | -0.09594981  | -2.0631404   | -0.29919556  |
| LACTOSE (CAS# 63-42-3); (M+Na)+                          | 0.8582601    | -0.096490055 | -2.062766    | -0.3008445   |
| C5 H11 N O2                                              | 0.41108897   | 1.9850076    | -1.2280855   | 1.1903361    |
| PALATINOSIDE (CAS# 343336-76-5); (M+Na)+                 | 0.85790384   | -0.09594981  | -2.0631404   | -0.29919556  |
| SARCOSINE (CAS# 107-97-1); (M+H)+                        | -0.5941436   | -0.059084453 | -1.5174391   | -0.4500078   |
| URACIL (CAS# 66-22-8); (M+H)+                            | -0.49581882  | 1.0910883    | -1.2493235   | 0.96567726   |
| SPHINGANINE (CAS# 764-22-7); (M+Na)+                     | -1.7665622   | 0.42062566   | -0.6012409   | 0.6995569    |
| MALTOSE (CAS# 69-79-4); (M+Na)+                          | 0.8582601    | -0.096490055 | -2.062766    | -0.3008445   |
| 5-AMINOPENTANOATE (CAS# 660-88-8); (M+H)+                | -0.4155491   | 1.5047652    | -1.6625125   | 0.87145287   |
| C19 H30 O4 P2                                            | 0.025088236  | -0.80140036  | -0.6536106   | -0.46980318  |
| UROCANATE (CAS# 104-98-3); (M+H)+                        | -0.31037295  | -0.3818244   | -0.12329705  | -0.96736974  |
| C22 H27 N2 O3 P                                          | -0.5312381   | -0.010013178 | 0.04940693   | -0.6584667   |
| 100.001@0.5352921                                        | 0.16412914   | 0.3495564    | 1.5191069    | 0.21195203   |
| 284.0765@2.291664                                        | 0.61268085   | 1.6767333    | -1.7048345   | 1.4425174    |
| 226.0954@3.0594227                                       | -2.965444    | -0.66347253  | -0.28079778  | 0.1498254    |
| 260.1374@3.1285338                                       | 0.6586319    | 0.6347213    | -1.9348218   | -0.68691593  |
| 913.233@3.608588                                         | -1.2571018   | -1.0077349   | 1.4767283    | -0.16466562  |
| 987.5345@7.6266623                                       | -2.2357683   | 0.48103446   | -0.52235234  | -0.75561684  |
| 785.5006@8.232729                                        | -3.3811388   | -0.36604983  | -0.60161185  | -0.9833654   |
| 1039.5897@9.211685                                       | -2.9704952   | 0.4780026    | -0.5416486   | -1.6201197   |
| 1053.6014@10.078312                                      | -1.6771326   | -0.3559702   | -0.22722168  | -1.2355721   |
| 939.5053@10.673127                                       | -3.2486427   | 0.27962577   | -0.002281278 | -0.97655517  |
| 1005.4501@10.68129                                       | -3.0068686   | 0.24528679   | 0.086904116  | -0.95831954  |
| 766.3968@12.524396                                       | -3.6357691   | 0.5967283    | -1.2316749   | -0.49425656  |
| 810.4211@12.899628                                       | -3.524336    | 0.8156637    | -1.5854195   | -0.10295531  |
| 854.4479@13.245994                                       | -3.436826    | 0.8213225    | -1.5884084   | -0.47098106  |
| 898.4725@13.568503                                       | -3.2934394   | 1.0110323    | -1.6458393   | -0.6694556   |
| 942.4985@13.866499                                       | -2.6954756   | -0.26289642  | -2.1467936   | -0.50219166  |
| 1030.5504@14.407582                                      | -3.118217    | 0.88869303   | -2.0793436   | -0.5690428   |
| 856.2961@16.427088                                       | -3.015727    | -2.3159213   | 0.69787276   | -0.56994987  |
| 1196.4637@16.426586                                      | -3.114346    | -2.2405977   | 0.6917736    | -0.64135313  |
| 810.295@16.42741                                         | -3.080004    | -2.270409    | 0.8272909    | -0.64661527  |
| 794.3295@16.810375                                       | -3.121972    | -1.5414342   | -0.6859598   | 0.5808411    |
| 794.326@17.455503                                        | -2.8074403   | -1.0101734   | -0.7901785   | 0.5737963    |
| 822.3579@17.51095                                        | -2.1449137   | 0.21224381   | -2.4849718   | -0.525661    |
| 866.3585@18.392859                                       | -2.9016666   | -1.8014011   | -0.48186633  | -0.9293755   |
| 445.2466@19.244831                                       | -0.5296072   | 0.21577355   | -3.1368089   | 0.021820083  |
| 982.6736@19.445652                                       | 0.48032218   | -3.715164    | -0.26398352  | 0.16855511   |
| 1484.9976@19.447369                                      | 0.8294047    | -3.5186996   | 0.011755079  | 0.06499675   |
| 828.3997@19.74982                                        | -0.39976084  | 0.7023258    | -1.6332053   | 1.5834197    |
| 1614.941@19.78335                                        | -0.5769902   | -3.7234483   | -0.95336163  | 0.39338467   |
| 1608.9333@19.784367                                      | -0.5638368   | -3.8360445   | -0.9435173   | 0.3029771    |
| 1546.945@19.785664                                       | -0.75003904  | -3.8333268   | -0.98309267  | 0.323585     |
| 1478.96@19.788363                                        | -1.0699009   | -3.8123696   | -0.62493956  | 0.47000355   |

|                     |              |             |              |              |
|---------------------|--------------|-------------|--------------|--------------|
| 1066.6136@19.785637 | -4.55E-04    | -3.851453   | -0.59747845  | 0.8789802    |
| 1134.606@19.783178  | -0.6634289   | -3.7631912  | -0.9938318   | 0.0082075    |
| 1959.3063@19.789024 | 1.0602012    | -1.843538   | -0.83862895  | 0.030881375  |
| 1484.9901@19.787737 | -0.77564615  | -3.9231732  | -0.224803    | 0.2770639    |
| 796.4833@19.792416  | -0.4672908   | -0.6141853  | -3.122058    | -0.09503983  |
| 359.3533@21.494558  | -1.097992    | 0.58036906  | -3.560374    | -0.3714043   |
| 359.3371@21.756748  | -1.4537189   | 0.47858936  | -0.5948731   | 0.80843896   |
| 988.3911@21.79887   | -0.41267532  | -1.8841902  | 2.972952     | 0.8612528    |
| 778.4451@21.968401  | 0.6257381    | 0.16757329  | -2.778667    | -0.16278602  |
| 756.4574@21.98579   | -0.06415888  | -0.40934306 | -3.5022597   | -0.015260607 |
| 822.4739@21.999432  | 0.5668273    | -0.40014803 | -3.1677854   | -0.22778423  |
| 1018.4765@21.967066 | 2.828886     | -1.5884718  | -1.6188385   | -0.034849927 |
| 866.4949@22.026224  | -0.25587797  | 0.7876873   | -3.229449    | -0.25260866  |
| 764.412@22.092783   | -1.299006    | -0.44963726 | -0.82381636  | -1.2496815   |
| 954.5524@22.05358   | -0.7026156   | 0.42912236  | -2.603876    | 0.3481785    |
| 808.4348@22.107382  | -1.2976373   | 0.47841227  | -0.98295164  | -0.95509166  |
| 1138.606@22.160442  | -1.4454733   | -0.50520927 | -1.6396536   | -0.35560942  |
| 1182.6368@22.152647 | -2.1714933   | 1.4615786   | -0.7937895   | 0.22143173   |
| 750.4164@22.246555  | -0.73968196  | -1.5062995  | -2.7196357   | 0.12021892   |
| 748.44@22.25464     | -1.6927853   | -1.3720008  | -2.8986127   | 0.10146748   |
| 794.4457@22.256075  | -1.8493072   | -0.8668705  | -2.361962    | 0.35113037   |
| 854.4511@22.263014  | -2.4082384   | -0.574216   | -2.9453168   | -0.17284527  |
| 792.4642@22.26437   | -1.998589    | -1.4633468  | -2.7938497   | -0.03741055  |
| 838.4701@22.265482  | -2.3424723   | -1.4172603  | -1.5788046   | -0.86439484  |
| 770.4795@22.26616   | -2.5268018   | -1.0230439  | -2.7195923   | -0.25649822  |
| 898.4602@22.272749  | -2.76495     | -0.7793151  | -2.1214411   | -0.8236143   |
| 836.4918@22.271847  | -2.4311512   | -1.038885   | -2.5021164   | -0.9517447   |
| 814.5071@22.272953  | -2.7230067   | -1.0140438  | -2.4287324   | -0.68591535  |
| 942.4895@22.279886  | -2.5765831   | -0.9320904  | -0.6893071   | -1.2812144   |
| 880.5145@22.278997  | -2.5452716   | -0.4362031  | -2.0072927   | -1.4894061   |
| 858.5306@22.280897  | -2.8018057   | -0.471175   | -2.0297613   | -1.1694361   |
| 902.5615@22.287943  | -2.704971    | 0.07564606  | -1.5250709   | -1.4924477   |
| 924.5438@22.285477  | -2.5220652   | 0.25688428  | -1.3772837   | -1.6549523   |
| 946.5839@22.293484  | -2.5434048   | 0.3770061   | -1.0708764   | -1.7440593   |
| 968.5668@22.29198   | -2.309438    | 0.43737683  | -1.0141076   | -1.8870124   |
| 990.6147@22.29418   | -2.4984605   | 0.5434772   | -0.77680105  | -1.6467692   |
| 1012.5953@22.298977 | -1.2082728   | -1.0322262  | -1.346019    | -1.8083262   |
| 1080.592@22.3007    | -2.8425608   | 0.6910039   | -0.20789067  | -1.3051335   |
| 1056.6182@22.300308 | -2.0162976   | 0.47606778  | -0.48484522  | -2.0162644   |
| 1124.6028@22.293247 | -1.0520512   | -0.54988027 | -1.2749617   | -1.3056477   |
| 1168.6357@22.313885 | -1.3579533   | 0.48737502  | -0.5531902   | -1.6028947   |
| 1144.6743@22.311687 | -1.9125451   | 0.5053896   | -0.4402694   | -1.8459238   |
| 1232.7281@22.32031  | -2.0435483   | 0.5162121   | -0.38941255  | -1.4822232   |
| 367.417@22.331345   | -2.2632394   | 2.1664658   | -1.1032573   | 0.2623653    |
| 781.4594@22.326466  | -2.1317627   | -2.60799    | -0.5548234   | 0.7286661    |
| 825.4897@22.337337  | -1.1370274   | -2.6883116  | -0.86262196  | 0.49544305   |
| 806.4853@22.410055  | -0.70123243  | -1.7241931  | -2.5481207   | 0.63226753   |
| 850.5065@22.444714  | 0.116760895  | -0.2944993  | -1.9587244   | 1.9890904    |
| 784.4937@22.412384  | -2.9630787   | -0.704131   | -1.8688354   | 0.67195445   |
| 828.5144@22.427803  | -3.0833902   | -0.22040573 | -1.2846974   | 0.057210803  |
| 758.4818@22.426146  | -3.2933521   | 1.0410728   | 0.637151     | 1.5150822    |
| 872.544@22.427355   | -3.273843    | 0.08884093  | -1.4593308   | 0.23286214   |
| 802.5088@22.430168  | -3.1748803   | 1.6627078   | 0.6831033    | 0.85701954   |
| 780.5207@22.436514  | -3.509741    | 0.8486444   | 0.15303475   | 1.5863944    |
| 824.546@22.43388    | -3.0996475   | 0.95889306  | 0.42513475   | 0.2742019    |
| 934.5858@22.438871  | -3.2703366   | 0.57413447  | 0.2910257    | 1.1043471    |
| 868.572@22.445438   | -3.4628239   | 0.7000948   | 0.20803207   | 0.49025682   |
| 912.5968@22.448559  | -3.1726594   | -0.5597121  | -0.5351518   | 1.2457788    |
| 1066.6592@22.45198  | -2.8568704   | 0.22600812  | -0.11193704  | 0.73618686   |
| 904.5756@22.50441   | -2.826008    | 0.9944166   | -0.29817784  | 2.113467     |
| 1036.6488@22.501652 | -1.4711394   | 0.9902615   | 0.58783233   | 2.0646303    |
| 1168.7233@22.505514 | -0.81396306  | 0.76747656  | 0.8946537    | 2.3730135    |
| 763.4031@22.503992  | -2.905166    | 1.0057354   | 1.9542351    | -0.04063937  |
| 948.6022@22.490602  | -2.0088577   | 1.2325108   | -0.32170075  | 2.6593182    |
| 1080.6711@22.493565 | -1.8897781   | 1.1581717   | -0.5398027   | 1.6270409    |
| 1344.8298@22.509373 | -0.94737625  | 0.413022    | 0.98968947   | 2.6877642    |
| 1432.8842@22.508942 | -1.5021545   | 0.76250124  | 0.6787473    | 2.2903562    |
| 1212.753@22.50781   | -1.1422384   | 0.20075254  | 0.47492087   | 2.4207077    |
| 1124.6996@22.511711 | -0.5750532   | 0.5846409   | 0.70231044   | 2.55178      |
| 1256.7773@22.507423 | -0.6171715   | 0.9925729   | -0.37830678  | 2.3089542    |
| 1300.8066@22.50717  | -0.47405547  | 0.58459175  | 1.0488569    | 2.326171     |
| 862.2494@22.540915  | 2.0332382    | 1.126893    | -0.9471235   | -0.7404379   |
| 794.2594@22.54076   | 2.4909315    | 0.58574396  | -1.1090535   | -0.66278636  |
| 750.5114@22.61297   | -1.7202623   | -0.4194867  | -1.0606234   | 0.7909405    |
| 757.5616@24.534454  | -0.25068274  | 0.52565956  | 0.8346377    | 0.052632615  |
| 829.5609@24.580767  | -0.16320789  | 0.48330402  | 0.4135195    | 0.7893194    |
| 983.5043@24.547352  | -0.64234746  | 0.11587797  | 1.0127871    | 0.51181066   |
| 873.5459@24.643751  | -0.1281141   | 0.15246436  | 0.46694762   | 1.2388698    |
| 959.4948@24.635881  | -0.35725328  | 0.20188706  | 0.7057124    | 0.9069576    |
| 849.7948@25.00409   | -0.24859564  | 0.5815352   | -0.66942275  | -2.253247    |
| 899.8317@25.102629  | -0.54616076  | -0.11961137 | -0.90866524  | -2.3863087   |
| 831.8173@25.115229  | -1.3181657   | 1.0213486   | -0.39928073  | -2.8248353   |
| 807.8118@25.191593  | -1.3649106   | 0.8886391   | -0.8423552   | -1.4598292   |
| 875.8232@25.200348  | -1.6474032   | 0.6054729   | -0.5794347   | -1.5863667   |
| 925.8544@25.280811  | -1.0179827   | -0.5978279  | -0.36822262  | -1.8399799   |
| 588.6146@25.369286  | -1.1985176   | 1.8494838   | -1.2035127   | -1.9102168   |
| 767.7954@25.46408   | -0.3301623   | -0.4998979  | -0.77204525  | -2.0919895   |
| 851.8118@25.594587  | 0.45719063   | -0.5248392  | -1.1666756   | -0.8889386   |
| 1185.4827@5.0349865 | 0.36276293   | 1.3490485   | -1.7445568   | -0.91546583  |
| 756.3904@6.6820736  | -1.212087    | 0.023725867 | -0.5999614   | 0.076318204  |
| 822.3443@6.673502   | -0.9882525   | -0.8720015  | -0.19076703  | 0.7571432    |
| 980.6528@19.790384  | 1.4399601    | -3.450898   | -0.09484346  | -0.017360002 |
| 1054.6086@22.301497 | -2.0957096   | 0.5524047   | -0.44374782  | -1.8896326   |
| 764.5205@22.788843  | -2.597632    | -0.22326759 | 0.5051686    | 1.1981924    |
| 1342.8453@23.021261 | -0.03754004  | -0.38746583 | 1.7533503    | 1.8471206    |
| 1298.8292@23.027048 | -0.40511116  | -0.31166935 | 2.5575845    | 0.934256     |
| 1210.7787@23.040709 | -0.03026098  | -0.54005885 | 1.3802359    | 1.9753644    |
| 1166.7499@23.045338 | 0.2821926    | -0.1518658  | -0.109127715 | 1.8421941    |
| 1122.7275@23.046068 | 0.26409256   | -0.15079154 | -0.14114834  | 1.622332     |
| 1078.6967@23.051666 | 0.25740358   | 0.021866016 | -0.0620273   | 1.6097625    |
| 871.5331@24.445992  | -0.23041794  | 0.3984509   | 0.7881726    | 1.2395511    |
| 803.5482@24.449387  | -0.06605914  | 0.60979086  | 0.7183601    | 0.87436324   |
| 795.5152@24.516008  | 0.15458573   | 0.4668205   | 0.5461925    | 0.97059137   |
| 925.4703@24.515404  | -0.03724107  | 0.6494166   | 0.71075016   | 0.6089351    |
| 1819.008@24.514679  | -0.014913574 | 0.659459    | 0.5843771    | 0.87668854   |
| 1825.0208@24.524853 | 0.012680426  | 0.3536985   | 0.34289718   | 0.78906167   |
| 779.5456@24.53104   | -0.5165795   | 0.36505646  | 0.9657357    | 0.002262257  |
| 915.5211@24.535116  | 0.14078175   | 0.65420365  | 0.68221414   | 0.8546211    |
| 847.5322@24.538563  | -0.116289586 | 0.53604496  | 0.90813977   | 0.29463938   |
| 783.5801@24.648405  | -0.18144883  | 0.16921979  | 0.46569952   | 1.0501392    |
| 1053.4802@7.6255107 | -1.7537252   | 0.3572247   | -0.96805173  | -1.0007141   |
| 844.5074@22.009975  | 0.6337739    | 0.18939619  | -3.153501    | -0.609717    |
| 888.5332@22.030827  | 0.30238402   | 0.15047115  | -2.86988     | 0.13642639   |
| 769.46@22.165522    | -0.7104667   | -3.6980329  | -1.2123183   | 0.67987525   |
| 1074.5717@22.300463 | -1.3095697   | 1.8890297   | 0.47037515   | -1.5623145   |
| 890.5538@22.44111   | -3.4580703   | 0.9800283   | -0.3817491   | 1.1800768    |
| 1388.8752@22.508917 | -0.7268254   | 1.3142902   | -0.29394308  | 2.2970953    |
| 521.5911@22.722954  | -0.25890252  | 1.437565    | 0.543279     | 1.4091403    |
| 1006.6558@22.773655 | -2.5751688   | 0.39584634  | 0.73855776   | 0.41691765   |
| 918.5902@22.784018  | -2.7482407   | -0.6831187  | 1.3379585    | 1.1394196    |
| 852.5821@22.78476   | -2.2125044   | 0.13212608  | 1.6248322    | 0.8256672    |
| 808.5553@22.77996   | -2.6582105   | -0.3071209  | 1.616416     | 1.3752242    |
| 786.5182@22.788322  | -2.012808    | 0.24925832  | 1.247339     | 1.3302791    |
| 830.5392@22.788803  | -1.8733913   | 0.13729185  | 1.0571501    | 1.3270203    |
| 788.5265@22.951626  | -1.1584473   | -0.32701015 | 0.54578865   | 0.45447728   |
| 1474.927@23.01443   | -0.23659551  | -0.1324678  | 2.167883     | 1.6936723    |
| 1430.9071@23.017159 | -0.16865402  | -0.15124543 | 2.0625093    | 1.5095196    |
| 1454.8632@23.030483 | -0.91223276  | 0.6185347   | 0.080804236  | 0.34541225   |
| 1386.8802@23.00639  | 0.014213324  | -0.1463407  | 1.1603017    | 0.7234416    |

|                     |              |              |             |              |
|---------------------|--------------|--------------|-------------|--------------|
| 1410.8372@23.022943 | -0.5843329   | 1.370288     | 0.4190223   | -0.03366426  |
| 1366.8147@23.031672 | 0.19167826   | 0.034984946  | 0.07920424  | 1.6478257    |
| 1254.8029@23.033033 | 0.22378314   | -0.04377941  | -0.05440586 | 1.8241614    |
| 1278.7646@23.037779 | -0.27884975  | -0.08038813  | 0.007164996 | 1.6708889    |
| 1234.7437@23.039314 | -0.6254495   | -0.017898895 | 0.14381535  | 1.3402479    |
| 1190.7104@23.050585 | 0.4011259    | -0.2771787   | 1.9813964   | 1.6403872    |
| 1102.6552@23.055687 | 0.63566816   | 0.40672785   | 0.19617064  | 0.9673574    |
| 1034.6707@23.058197 | 0.30744165   | 0.73283553   | 0.20588782  | 0.9532256    |
| 968.6634@23.068396  | 0.007600963  | 0.46482086   | 1.8179661   | 1.2568288    |
| 990.6445@23.054432  | 0.083702564  | -0.39270943  | 1.7334217   | 1.5368601    |
| 946.6215@23.066227  | 0.45765305   | 0.51337117   | 0.22082183  | 1.1394573    |
| 924.6419@23.040983  | -0.105006695 | 1.5552266    | 0.6335422   | -0.21194051  |
| 902.5975@23.068104  | 0.27043056   | 0.16216555   | 0.0642433   | 1.1528131    |
| 792.5564@23.077744  | 0.28790012   | 0.4847381    | 0.13310328  | 1.3627756    |
| 580.276@19.786844   | -1.7687696   | -3.5725284   | -0.6850851  | 0.19814743   |
| 968.5658@22.031195  | -1.0293839   | -0.6583518   | -2.3330114  | 0.62307954   |
| 796.3903@21.512106  | -1.1981789   | -0.9945609   | 0.45411915  | 0.08566591   |
| 813.488@22.168575   | -0.344835    | -3.332937    | -1.0688767  | 1.2139883    |
| 1320.7703@22.341627 | -2.20808     | 0.7721035    | -0.44742143 | -0.033212632 |
| 938.564@22.436773   | -0.7535994   | 0.76874286   | 0.6810486   | 0.7061027    |
| 846.533@22.45591    | -3.1896753   | 1.4119911    | -0.33094817 | 1.4442244    |
| 749.7589@25.361473  | -0.56598157  | 0.062352262  | -0.79821104 | -1.3753767   |
| 113.9797@0.5336199  | 0.7590653    | -0.69577014  | 1.3736111   | 0.47318026   |
| 762.242@19.776638   | -0.027886383 | -3.5981152   | -1.6728379  | 0.81320393   |
| 763.2595@22.065031  | -2.030754    | -0.5510601   | 0.017154321 | 0.5579724    |
| 769.2738@22.124748  | -1.1572421   | 1.3249271    | -0.26858985 | 0.46515694   |
| 789.2611@22.251148  | -0.5382751   | -0.42299145  | -0.44695988 | 0.029075932  |
| 789.2642@22.332657  | -0.54382384  | 0.6216276    | -0.10265769 | -0.57954633  |
| 1110.6819@22.456293 | -2.6151953   | -1.3377303   | -0.5283869  | 0.5311138    |
| 644.697@27.795586   | -1.0705788   | 2.2092388    | -0.81762815 | 0.3758279    |
| 1066.6133@19.442995 | -1.3860914   | -2.2540905   | -0.21002571 | 0.45281813   |
| 1198.6483@22.548525 | -1.1031477   | -0.30919892  | -0.5145377  | -0.57893884  |
| 894.5349@22.419611  | -2.6662657   | -0.7736501   | -0.6523726  | -0.07638407  |
| 719.4407@22.357714  | 0.37796888   | 1.3684976    | 0.9710736   | -0.13884753  |
| 629.7354@26.437578  | 0.41156536   | 1.3952956    | -0.6918311  | 1.2668812    |
| 808.8757@26.516602  | -0.2398255   | 0.8261973    | 0.087129265 | -1.0408125   |
| 765.7811@25.317173  | -0.3902478   | -0.72350514  | -1.1854254  | -0.84860766  |

| Compound                                            | p | p (Corr) | FC ([Healthy] vs [Lesional]) | Log FC ([Healthy] vs [Lesional]) | FC (abs) ([Healthy] vs [Lesional]) | Regulation ([Healthy] vs [Lesional]) | FC ([Healthy] vs [Nonlesional]) | Log FC ([Healthy] vs [Nonlesional]) | FC (abs) ([Healthy] vs [Nonlesional]) | Regulation ([Healthy] vs [Nonlesional]) | FC ([Lesional] vs [Nonlesional]) | Log FC ([Lesional] vs [Nonlesional]) | FC (abs) ([Lesional] vs [Nonlesional]) | Regulation ([Lesional] vs [Nonlesional]) |
|-----------------------------------------------------|---|----------|------------------------------|----------------------------------|------------------------------------|--------------------------------------|---------------------------------|-------------------------------------|---------------------------------------|-----------------------------------------|----------------------------------|--------------------------------------|----------------------------------------|------------------------------------------|
| C13 H30 N8 O S2                                     | 0 | 0        | 8.840688                     | 3.1441586                        | 8.840688                           | up                                   | -173.33847                      | -7.437448                           | 173.33847                             | down                                    | -1532.4315                       | -10.581607                           | 1532.4315                              | down                                     |
| C4 H9 N S                                           | 0 | 0        | -4959.664                    | -12.276027                       | 4959.664                           | down                                 | -44.505363                      | -5.4759073                          | 44.505363                             | down                                    | 111.43966                        | 6.800119                             | 111.43966                              | up                                       |
| C20 H32 N12                                         | 0 | 0        | 342.2992                     | 8.419114                         | 342.2992                           | up                                   | -3.9035184                      | -1.9647751                          | 3.9035184                             | down                                    | -1336.1713                       | -10.383889                           | 1336.1713                              | down                                     |
| DEOXYCORTICOSTERONE ACETATE (CAS# 56-47-3); (M+Na)+ | 0 | 0        | 30.917631                    | 4.950358                         | 30.917631                          | up                                   | -91.93015                       | -6.522466                           | 91.93015                              | down                                    | -2842.2625                       | -11.472824                           | 2842.2625                              | down                                     |
| C3 H9 N3 O2                                         | 0 | 0        | 1914.624                     | 10.902845                        | 1914.624                           | up                                   | 8.095078                        | 3.017045                            | 8.095078                              | up                                      | -236.51704                       | -7.8858004                           | 236.51704                              | down                                     |
| C31 H47 N4 O P5                                     | 0 | 0        | -552.31604                   | -9.10935                         | 552.31604                          | down                                 | -1379.4188                      | -10.429845                          | 1379.4188                             | down                                    | -2.4975173                       | -1.3204947                           | 2.4975173                              | down                                     |
| C33 H46 N10 P2                                      | 0 | 0        | 272.2588                     | 8.088835                         | 272.2588                           | up                                   | -23.292688                      | -4.5418053                          | 23.292688                             | down                                    | -6341.639                        | -12.63064                            | 6341.639                               | down                                     |
| C8 H14 N6 O                                         | 0 | 0        | 3306.5928                    | 11.69113                         | 3306.5928                          | up                                   | 7.512436                        | 2.9092808                           | 7.512436                              | up                                      | -440.14923                       | -8.781849                            | 440.14923                              | down                                     |
| C18 H41 N7                                          | 0 | 0        | 1996.0295                    | 10.962917                        | 1996.0295                          | up                                   | 1.1455369                       | 0.19602394                          | 1.1455369                             | up                                      | -1742.4402                       | -10.766893                           | 1742.4402                              | down                                     |
| C13 H30 N2 O4 S                                     | 0 | 0        | 57.208805                    | 5.8381653                        | 57.208805                          | up                                   | -286.88498                      | -8.164329                           | 286.88498                             | down                                    | -16412.346                       | -14.002494                           | 16412.346                              | down                                     |
| C8 H16 N7 O P                                       | 0 | 0        | 8709.0625                    | 13.088302                        | 8709.0625                          | up                                   | 2.8549564                       | 1.5134687                           | 2.8549564                             | up                                      | -3050.506                        | -11.574833                           | 3050.506                               | down                                     |
| C30 H51 N O16                                       | 0 | 0        | -559.07196                   | -9.12689                         | 559.07196                          | down                                 | -35.025238                      | -5.130323                           | 35.025238                             | down                                    | 15.96198                         | 3.9965677                            | 15.96198                               | up                                       |
| C39 H79 O P 54                                      | 0 | 0        | -4.780502                    | -2.257162                        | 4.780502                           | down                                 | 219.90396                       | 7.78073                             | 219.90396                             | up                                      | 1051.2516                        | 10.037892                            | 1051.2516                              | up                                       |
| C25 H46 N7 O2 P S2                                  | 0 | 0        | -5193.781                    | -12.342569                       | 5193.781                           | down                                 | -893.32983                      | -9.803049                           | 893.32983                             | down                                    | 5.8139563                        | 2.5395203                            | 5.8139563                              | up                                       |
| GLYCOCHENODEOXYCHOLATE (CAS# 640-79-9); (M+Na)+     | 0 | 0        | 1830.2837                    | 10.837852                        | 1830.2837                          | up                                   | 3.2361462                       | 1.6942768                           | 3.2361462                             | up                                      | -565.5751                        | -9.143575                            | 565.5751                               | down                                     |
| C29 H46 N6 O14                                      | 0 | 0        | -41.020863                   | -5.358286                        | 41.020863                          | down                                 | -233.56319                      | -7.867669                           | 233.56319                             | down                                    | -5.693764                        | -2.5093827                           | 5.693764                               | down                                     |
| C9 H16 N2 O2                                        | 0 | 0        | 309.697                      | 8.2747135                        | 309.697                            | up                                   | -6.8298345                      | -2.7718506                          | 6.8298345                             | down                                    | -2115.1792                       | -11.046564                           | 2115.1792                              | down                                     |
| C12 H14 N8 O                                        | 0 | 0        | 43466.797                    | 15.407626                        | 43466.797                          | up                                   | -5.625378                       | -2.49195                            | 5.625378                              | down                                    | -244517.16                       | -17.899576                           | 244517.16                              | down                                     |
| C28 H52 N O2 P S2                                   | 0 | 0        | -1665.4698                   | -10.701714                       | 1665.4698                          | down                                 | -7.887179                       | -2.9795094                          | 7.887179                              | down                                    | 7.722204                         | 211.16168                            | 7.722204                               | down                                     |
| C8 H15 N O4                                         | 0 | 0        | 107.7828                     | 6.751983                         | 107.7828                           | up                                   | -77.39283                       | -6.274128                           | 77.39283                              | down                                    | -8341.618                        | -13.026112                           | 8341.618                               | down                                     |
| C12 H14 O5                                          | 0 | 0        | 7061.6167                    | 12.785783                        | 7061.6167                          | up                                   | 6.009079                        | 2.587144                            | 6.009079                              | up                                      | -1175.158                        | -10.198639                           | 1175.158                               | down                                     |
| C28 H45 N7 O4 P2                                    | 0 | 0        | -4.2674932                   | -2.0933888                       | 4.2674932                          | down                                 | -1805.6877                      | -10.818333                          | 1805.6877                             | down                                    | -423.12616                       | -8.724944                            | 423.12616                              | down                                     |
| C17 H34 N6 O6 S2                                    | 0 | 0        | -1691.4209                   | -10.72402                        | 1691.4209                          | down                                 | -5.5830827                      | -2.481062                           | 5.5830827                             | down                                    | 302.95465                        | 8.242958                             | 302.95465                              | up                                       |
| LYSINE (CAS# 56-87-1); (M+Na)+                      | 0 | 0        | 23.6933                      | 4.566407                         | 23.6933                            | up                                   | -104.9409                       | -6.7134333                          | 104.9409                              | down                                    | -2486.3962                       | -11.27984                            | 2486.3962                              | down                                     |
| C23 H36 N17 O P                                     | 0 | 0        | -1177.8597                   | -10.201952                       | 1177.8597                          | down                                 | -115.79925                      | -6.855482                           | 115.79925                             | down                                    | 10.171566                        | 3.3464699                            | 10.171566                              | up                                       |
| C4 H11 N3 O                                         | 0 | 0        | 4923.071                     | 12.265343                        | 4923.071                           | up                                   | 5.569805                        | 2.4776268                           | 5.569805                              | up                                      | -883.8856                        | -9.787716                            | 883.8856                               | down                                     |
| C18 H34 N6 O2                                       | 0 | 0        | -35.73226                    | -5.1591554                       | 35.73226                           | down                                 | 40.522186                       | 5.34064                             | 40.522186                             | up                                      | 1447.9498                        | 10.499796                            | 1447.9498                              | up                                       |
| C23 H28 O3                                          | 0 | 0        | 309.6552                     | 8.274519                         | 309.6552                           | up                                   | -74.91731                       | -6.227227                           | 74.91731                              | down                                    | -23198.537                       | -14.501746                           | 23198.537                              | down                                     |
| C10 H10 N8                                          | 0 | 0        | 87.109604                    | 6.44476                          | 87.109604                          | up                                   | -200.24048                      | -7.64559                            | 200.24048                             | down                                    | -17442.863                       | -14.090349                           | 17442.863                              | down                                     |
| THEOBROMINE (CAS# 83-67-0); (M+H)+                  | 0 | 0        | 1515.3821                    | 10.565466                        | 1515.3821                          | up                                   | 3.1265824                       | 1.6445866                           | 3.1265824                             | up                                      | -484.67685                       | -8.920879                            | 484.67685                              | down                                     |
| C11 H28 N5 O3 P                                     | 0 | 0        | 1020.37823                   | 9.994888                         | 1020.37823                         | up                                   | 126.682175                      | 6.9850698                           | 126.682175                            | up                                      | -8.054634                        | -3.009819                            | 8.054634                               | down                                     |
| C25 H45 N O8                                        | 0 | 0        | 65.96303                     | 6.043586                         | 65.96303                           | up                                   | -110.172905                     | -6.7836256                          | 110.172905                            | down                                    | -7267.3384                       | -12.827211                           | 7267.3384                              | down                                     |
| C37 H45 O3 P S                                      | 0 | 0        | -6.3587456                   | -2.6687422                       | 6.3587456                          | down                                 | 63.176792                       | 5.981323                            | 63.176792                             | up                                      | 401.725                          | 8.650064                             | 401.725                                | up                                       |
| C5 H10 N4 O2                                        | 0 | 0        | 2748.148                     | 11.424244                        | 2748.148                           | up                                   | 6.1738                          | 2.6261587                           | 6.1738                                | up                                      | -445.1307                        | -8.798085                            | 445.1307                               | down                                     |
| C32 H37 N20 P                                       | 0 | 0        | 2699.8108                    | 11.398643                        | 2699.8108                          | up                                   | 106.33839                       | 6.7325187                           | 106.33839                             | up                                      | -25.388863                       | -4.666124                            | 25.388863                              | down                                     |
| C22 H43 N7 O4 S2                                    | 0 | 0        | -110.7875                    | -6.7916512                       | 110.7875                           | down                                 | 35.767227                       | 5.1605663                           | 35.767227                             | up                                      | 3962.56                          | 11.952217                            | 3962.56                                | up                                       |
| C39 H37 N3 O2                                       | 0 | 0        | 6.142653                     | 2.618862                         | 6.142653                           | up                                   | -681.82904                      | -9.413266                           | 681.82904                             | down                                    | -4188.2397                       | -12.032128                           | 4188.2397                              | down                                     |
| C17 H33 N2 O P S2                                   | 0 | 0        | 51.858852                    | 5.6965184                        | 51.858852                          | up                                   | -1160.6011                      | -10.180656                          | 1160.6011                             | down                                    | -60187.42                        | -15.877174                           | 60187.42                               | down                                     |
| PANTOTHENATE (CAS# 79-83-4); (M+H)+                 | 0 | 0        | 284.40744                    | 8.151815                         | 284.40744                          | up                                   | -5.902441                       | -2.5613117                          | 5.902441                              | down                                    | -1678.6981                       | -10.713127                           | 1678.6981                              | down                                     |
| C27 H41 N5                                          | 0 | 0        | 9.218407                     | 3.2045174                        | 9.218407                           | up                                   | 1051.4504                       | 10.038165                           | 1051.4504                             | up                                      | 114.05989                        | 6.8336477                            | 114.05989                              | up                                       |
| C9 H24 N4 O2                                        | 0 | 0        | 28536.275                    | 14.800509                        | 28536.275                          | up                                   | 7.6470237                       | 2.9348984                           | 7.6470237                             | up                                      | -3731.6838                       | -11.865611                           | 3731.6838                              | down                                     |
| T19 H21 N9                                          | 0 | 0        | 989.87744                    | 9.951106                         | 989.87744                          | up                                   | -8.938792                       | -3.16008                            | 8.938792                              | down                                    | -8848.309                        | -13.111186                           | 8848.309                               | down                                     |
| TAURINE (CAS# 107-35-7); (M+H)+                     | 0 | 0        | -1544.0804                   | -10.592532                       | 1544.0804                          | down                                 | 4.54675                         | 2.1848357                           | 4.54675                               | up                                      | 7020.5464                        | 12.777368                            | 7020.5464                              | up                                       |
| C19 H27 N3 O P2                                     | 0 | 0        | 249.43451                    | 7.9625173                        | 249.43451                          | up                                   | 2.3992836                       | 1.2626038                           | 2.3992836                             | up                                      | -103.962074                      | -6.6999133                           | 103.962074                             | down                                     |
| CORTISOL (CAS# 50-23-7); (M+Na)+                    | 0 | 0        | 5.581934                     | 2.480765                         | 5.581934                           | up                                   | -170.62178                      | -7.414658                           | 170.62178                             | down                                    | -952.3994                        | -9.895423                            | 952.3994                               | down                                     |
| C33 H50 N5 O3 P5                                    | 0 | 0        | -361.0817                    | -8.4961815                       | 361.0817                           | down                                 | -3.320095                       | -1.7312245                          | 3.320095                              | down                                    | 108.75647                        | 6.7649574                            | 108.75647                              | up                                       |
| C9 H15 O P S                                        | 0 | 0        | 21657.904                    | 14.402606                        | 21657.904                          | up                                   | 44.640102                       | 5.4802685                           | 44.640102                             | up                                      | -485.16696                       | -8.922338                            | 485.16696                              | down                                     |
| C12 H16 O4                                          | 0 | 0        | 4839.5425                    | 12.240655                        | 4839.5425                          | up                                   | 106.308655                      | 6.7321153                           | 106.308655                            | up                                      | -45.523518                       | -5.50854                             | 45.523518                              | down                                     |
| C13 H18 O3 S                                        | 0 | 0        | 2432.0227                    | 11.247941                        | 2432.0227                          | up                                   | 4.7210727                       | 2.2391148                           | 4.7210727                             | up                                      | -515.14197                       | -9.008826                            | 515.14197                              | down                                     |
| C17 H36 N6 O2 S                                     | 0 | 0        | -10.700421                   | -3.4195957                       | 10.700421                          | down                                 | 865.98474                       | 9.758198                            | 865.98474                             | up                                      | 9266.401                         | 13.1777935                           | 9266.401                               | up                                       |
| C32 H2 O5 P2 S5                                     | 0 | 0        | -4346.283                    | -12.0855665                      | 4346.283                           | down                                 | 6.146725                        | 2.619818                            | 6.146725                              | up                                      | 26715.404                        | 14.705384                            | 26715.404                              | up                                       |
| C13 H21 N O2                                        | 0 | 0        | -202.73122                   | -7.6634245                       | 202.73122                          | down                                 | -15.275737                      | -3.93317                            | 15.275737                             | down                                    | 13.271455                        | 3.7302547                            | 13.271455                              | up                                       |
| D-GALACTOSAMINE (CAS# 7535-00-4); (M+H)+[H2O]       | 0 | 0        | -2547.24                     | -11.314719                       | 2547.24                            | down                                 | -3.781635                       | -1.9190102                          | 3.781635                              | down                                    | 673.58167                        | 9.395709                             | 673.58167                              | up                                       |
| C25 H47 N3 O5 S                                     | 0 | 0        | 55.419514                    | 5.792322                         | 55.419514                          | up                                   | -201.80743                      | -7.6568356                          | 201.80743                             | down                                    | -1184.07                         | -13.449158                           | 1184.07                                | down                                     |
| HOMOSERINE (CAS# 672-15-1); (M+Na)+                 | 0 | 0        | -258.56808                   | -8.0144005                       | 258.56808                          | down                                 | -1.0062054                      | -0.008924961                        | 1.0062054                             | down                                    | 256.97354                        | 8.005476                             | 256.97354                              | up                                       |
| D-MANNOSAMINE (CAS# 14307-02-9); (M+H)+[H2O]        | 0 | 0        | -2547.24                     | -11.314719                       | 2547.24                            | down                                 | -3.781635                       | -1.9190102                          | 3.781635                              | down                                    | 673.58167                        | 9.395709                             | 673.58167                              | up                                       |
| N(PIA)-METHYL-L-HISTIDINE (CAS# 332-80-9); (M+H)+   | 0 | 0        | -20.955084                   | -4.3892283                       | 20.955084                          | down                                 | 12.864526                       | 3.6853263                           | 12.864526                             | up                                      | 269.57715                        | 8.074554                             | 269.57715                              | up                                       |
| C14 H22 N2 O                                        | 0 | 0        | -12617.024                   | -13.623084                       | 12617.024                          | down                                 | 435.5415                        | 8.766666                            | 435.5415                              | up                                      | 5495234                          | 22.38975                             | 5495234                                | up                                       |
| MELANIN (CAS# 8049-97-6); (M+H)+                    | 0 | 0        | 335.86285                    | 8.391728                         | 335.86285                          | up                                   | -2.4939818                      | -1.3184509                          | 2.4939818                             | down                                    | -837.6358                        | -9.710179                            | 837.6358                               | down                                     |
| C10 H18 N2 O                                        | 0 | 0        | 3.520555                     | 1.8158029                        | 3.520555                           | up                                   | -241.58884                      | -7.91641                            | 241.58884                             | down                                    | -850.52686                       | -9.732213                            | 850.52686                              | down                                     |
| L-ALLOTHREONINE (CAS# 28954-12-3); (M+H)+           | 0 | 0        | -558.5363                    | -9.125507                        | 558.5363                           | down                                 | -1.0883156                      | -0.122097015                        | 1.0883156                             | down                                    | 513.21173                        | 9.00341                              | 513.21173                              | up                                       |
| HOMOSERINE (CAS# 672-15-1); (M+H)+                  | 0 | 0        | -558.5363                    | -9.125507                        | 558.5363                           | down                                 | -1.0883156                      | -0.122097015                        | 1.0883156                             | down                                    | 513.21173                        | 9.00341                              | 513.21173                              | up                                       |
| C18 H33 N6 O2 P5                                    | 0 | 0        | 250.76637                    | 7.9702                           | 250.76637                          | up                                   | 3.0495892                       | 1.6086149                           | 3.0495892                             | up                                      | -82.22955                        | -6.361585                            | 82.22955                               | down                                     |
| SUCROSE (CAS# 57-50-1); (M+Na)+                     | 0 | 0        | -934.73334                   | -9.868411                        | 934.73334                          | down                                 | -4.1201835                      | -2.0427086                          | 4.1201835                             | down                                    | 226.86688                        | 7.825702                             | 226.86688                              | up                                       |
| NORVALINE (CAS# 6600-40-4); (M+H)+                  | 0 | 0        | -24583.139                   | -14.5853815                      | 24583.139                          | down                                 | -1.5746406                      | -0.6550226                          | 1.5746406                             | down                                    | 15611.904                        | 13.930359                            | 15611.904                              | up                                       |
| BETA-ALANINE (CAS# 107-95-9); (M+H)+                | 0 | 0        | -1423.1665                   | -10.474889                       | 1423.1665                          | down                                 | -4.6294413                      | -2.210838                           | 4.6294413                             | down                                    | 307.41644                        | 8.2640505                            | 307.41644                              | up                                       |
| CELLOBIOS (CAS# 528-50-7); (M+Na)+                  | 0 | 0        | -934.73334                   | -9.868411                        | 934.73334                          | down                                 | -4.1201835                      | -2.0427086                          | 4.1201835                             | down                                    | 226.86688                        | 7.825702                             | 226.86688                              | up                                       |
| MELIBIOS (CAS# 585-99-9); (M+Na)+                   | 0 | 0        | -934.73334                   | -9.868411                        | 934.73334                          | down                                 | -4.1201835                      | -2.0427086                          | 4.1201835                             | down                                    | 226.86688                        | 7.825702                             | 226.86688                              | up                                       |
| VALINE (CAS# 72-18-4); (M+H)+                       | 0 | 0        | -24635.031                   | -14.588424                       | 24635.031                          | down                                 | -1.5746406                      | -0.6550226                          | 1.5746406                             | down                                    | 15644.859                        | 13.933401                            | 15                                     |                                          |



|                                                 |             |             |            |             |            |      |             |              |            |      |             |             |            |      |
|-------------------------------------------------|-------------|-------------|------------|-------------|------------|------|-------------|--------------|------------|------|-------------|-------------|------------|------|
| C22 H26 O6                                      | 1.91E-05    | 0.003912708 | 1.1402967  | 0.18940926  | 1.1402967  | up   | 1.0001758   | 2.54E-04     | 1.0001758  | up   | -1.1400962  | -0.18915558 | 1.1400962  | down |
| C28 H19 N8 P3                                   | 5.11E-05    | 0.007912692 | 1.4099609  | 0.49565506  | 1.4099609  | up   | 1.0046287   | 0.006662369  | 1.0046287  | up   | -1.4034647  | -0.4889927  | 1.4034647  | down |
| C24 H29 N2 P3 S                                 | 5.21E-05    | 0.007912692 | 1.2942225  | 0.37208557  | 1.2942225  | up   | -1.000615   | -8.87E-04    | 1.000615   | down | -1.2950183  | -0.2972925  | 1.2950183  | down |
| 810.295@16.42741                                | 5.78E-05    | 0.007912692 | 1.5967796  | 0.6751652   | 1.5967796  | up   | -1.0233587  | -0.033311844 | 1.0233587  | down | -1.6340781  | -0.708477   | 1.6340781  | down |
| C24 H29 O6 P S                                  | 9.87E-05    | 0.009192768 | 1.2273555  | 0.2955532   | 1.2273555  | up   | -1.000283   | -4.08E-04    | 1.000283   | down | -1.2277029  | -0.29596138 | 1.2277029  | down |
| C20 H41 N O2                                    | 8.45E-05    | 0.009192768 | 25.255663  | 4.658535    | 25.255663  | up   | -7.659135   | -2.9371815   | 7.659135   | down | -193.43654  | -7.5957165  | 193.43654  | down |
| C24 H32 O3 P2                                   | 1.04E-04    | 0.009192768 | 1.2475631  | 0.31911278  | 1.2475631  | up   | 1.024682    | 0.035176277  | 1.024682   | up   | -1.2175125  | -0.2839365  | 1.2175125  | down |
| C16 H37 N7                                      | 9.30E-05    | 0.009192768 | 4.673698   | 2.2245646   | 4.673698   | up   | -1.3939266  | -0.4791546   | 1.3939266  | down | -6.514792   | -2.7037191  | 6.514792   | down |
| 1196.4637@16.426586                             | 9.00E-05    | 0.009192768 | 2.0429664  | 1.0306654   | 2.0429664  | up   | -1.0252329  | -0.035951614 | 1.0252329  | down | -2.094516   | -1.066617   | 2.094516   | down |
| C11 H21 Cl N4 O3 S3                             | 1.60E-04    | 0.01263669  | -1.6057535 | -0.6832504  | 1.6057535  | down | 53.52464    | -5.742131    | 53.52464   | down | -33.333035  | -5.058881   | 33.333035  | down |
| C6 H4 O                                         | 1.64E-04    | 0.01263669  | -1.4955806 | -0.58070564 | 1.4955806  | down | -65.66424   | -6.037036    | 65.66424   | down | -43.905518  | -5.4563303  | 43.905518  | down |
| C7 H8 O                                         | 2.35E-04    | 0.013794394 | -6.394786  | -2.676896   | 6.394786   | down | -59.730125  | -5.900387    | 59.730125  | down | -9.340442   | -3.2234907  | 9.340442   | down |
| C17 H7 N6 O P                                   | 2.08E-04    | 0.013794394 | 1.3590013  | 0.44254684  | 1.3590013  | up   | -80.54767   | -6.331771    | 80.54767   | down | -109.464386 | -6.7743177  | 109.464386 | down |
| C12 H21 N4 O4 P                                 | 2.31E-04    | 0.013794394 | 2.5816045  | 1.368268    | 2.5816045  | up   | 1.379234    | 0.4638672    | 1.379234   | up   | -1.8717669  | -0.9044008  | 1.8717669  | down |
| C20 H43 N O3                                    | 2.34E-04    | 0.013794394 | 105.6023   | 6.7224975   | 105.6023   | up   | -5.6675925  | -2.502736    | 5.6675925  | down | -598.5106   | -9.225233   | 598.5106   | down |
| 856.2961@16.427088                              | 2.30E-04    | 0.013794394 | 1.7075974  | 0.7719679   | 1.7075974  | up   | -1.0117236  | -0.016815186 | 1.0117236  | down | -1.7276165  | -0.7887831  | 1.7276165  | down |
| C19 H45 N7                                      | 3.16E-04    | 0.01735956  | 93.81588   | 6.55176     | 93.81588   | up   | -5.795971   | -2.5350504   | 5.795971   | down | -543.7543   | -9.086811   | 543.7543   | down |
| C17 H37 N O3                                    | 3.24E-04    | 0.01735956  | 35.789196  | 5.1614523   | 35.789196  | up   | -4.538605   | -2.182249    | 4.538605   | down | -162.43304  | -7.3437014  | 162.43304  | down |
| C22 H49 N7                                      | 3.88E-04    | 0.019924572 | 2.785615   | 1.4779959   | 2.785615   | up   | -6.4386916  | -2.6867676   | 6.4386916  | down | -17.935717  | -4.1647635  | 17.935717  | down |
| 580.276@19.786844                               | 4.27E-04    | 0.021037083 | 1.3268285  | 0.40798187  | 1.3268285  | up   | 1.1562991   | 0.20951462   | 1.1562991  | up   | -1.1474786  | -0.19846725 | 1.1474786  | down |
| C23 H25 N5 O2                                   | 4.49E-04    | 0.021287674 | 1.1516702  | 0.20372772  | 1.1516702  | up   | 1.0045902   | 0.006607056  | 1.0045902  | up   | -1.1464081  | -0.19712067 | 1.1464081  | down |
| C27 H49 N4 O2 P5                                | 5.36E-04    | 0.023572594 | 2.5568116  | 1.3543458   | 2.5568116  | up   | -3.9289012  | -1.9741259   | 3.9289012  | down | -10.04546   | -3.3284717  | 10.04546   | down |
| C23 H20 N4 O                                    | 5.17E-04    | 0.023572594 | 1.2472967  | 0.31880474  | 1.2472967  | up   | -1.0261997  | -0.037311554 | 1.0261997  | down | -1.2799755  | -0.3561163  | 1.2799755  | down |
| C31 H39 N O S                                   | 6.37E-04    | 0.02708072  | 1.1390898  | 0.18788147  | 1.1390898  | up   | 1.0235901   | 0.033638     | 1.0235901  | up   | -1.1128379  | -0.15424347 | 1.1128379  | down |
| C31 H52 O2 P4                                   | 8.87E-04    | 0.035254396 | 1.6648515  | 0.7353935   | 1.6648515  | up   | 1.3484678   | 0.43132114   | 1.3484678  | up   | -1.2346245  | -0.30407238 | 1.2346245  | down |
| C41 H45 N7 S                                    | 8.69E-04    | 0.035254396 | -16.280941 | -4.025112   | 16.280941  | down | -10.5699625 | -3.4018984   | 10.5699625 | down | 1.5403025   | 0.62321377  | 1.5403025  | up   |
| C37 H51 O3 P S2                                 | 9.42E-04    | 0.03625557  | 1.4394517  | 0.5255194   | 1.4394517  | up   | 1.2685871   | 0.3432262    | 1.2685871  | up   | -1.1346889  | -0.18229675 | 1.1346889  | down |
| C14 H20 N2 O2                                   | 0.001079289 | 0.04029345  | 4.988992   | 2.3187485   | 4.988992   | up   | -2.2306514  | -1.157465    | 2.2306514  | down | -11.128702  | -3.4762135  | 11.128702  | down |
| TAURINE (CAS# 107-35-7); (M+Na)+                | 0.002006192 | 0.040899575 | -5.2470765 | -2.3915138  | 5.2470765  | down | 1.2515237   | 0.32368565   | 1.2515237  | up   | 6.5668406   | 2.7151995   | 6.5668406  | up   |
| C22 H24 N8 O P4                                 | 0.001854072 | 0.040899575 | 22.654655  | 4.5017357   | 22.654655  | up   | 1.1895987   | 0.25047493   | 1.1895987  | up   | -19.04395   | -4.2512608  | 19.04395   | down |
| C10 H11 N5                                      | 0.001948791 | 0.040899575 | 1.3653125  | 0.44923115  | 1.3653125  | up   | 1.2340362   | 0.30338478   | 1.2340362  | up   | -1.1063795  | -0.14584637 | 1.1063795  | down |
| C24 H33 N O6                                    | 0.001214501 | 0.040899575 | 1.0911236  | 0.12581444  | 1.0911236  | up   | 1.0171754   | 0.024568558  | 1.0171754  | up   | -1.0726994  | -0.10124588 | 1.0726994  | down |
| C10 H14 O                                       | 0.001902117 | 0.040899575 | 1.4924824  | 0.57771397  | 1.4924824  | up   | 1.2495605   | 0.32142067   | 1.2495605  | up   | -1.194406   | -0.2562933  | 1.194406   | down |
| C30 H41 N6 O3 P                                 | 0.001562281 | 0.040899575 | 1.4081092  | 0.49375916  | 1.4081092  | up   | 1.3016044   | 0.380291     | 1.3016044  | up   | -1.0818257  | -0.11346817 | 1.0818257  | down |
| C24 H52 N2 P2 S                                 | 0.002174182 | 0.040899575 | 1.4764904  | 0.56217194  | 1.4764904  | up   | 1.2886393   | 0.36584854   | 1.2886393  | up   | -1.1457747  | -0.1963234  | 1.1457747  | down |
| C10 H18 O3 P2                                   | 0.001519089 | 0.040899575 | 1.4069926  | 0.49261475  | 1.4069926  | up   | 1.2435862   | 0.31450653   | 1.2435862  | up   | -1.1313993  | -0.17810822 | 1.1313993  | down |
| C13 H18 N2 O                                    | 0.002100437 | 0.040899575 | 6.7886577  | 2.7631264   | 6.7886577  | up   | -1.7791219  | -0.8311653   | 1.7791219  | down | -12.077849  | -3.5942917  | 12.077849  | down |
| C10 H14 N2 O                                    | 0.002155893 | 0.040899575 | 6.085707   | 2.605425    | 6.085707   | up   | -3.3096461  | -1.726677    | 3.3096461  | down | -20.141537  | -4.332102   | 20.141537  | down |
| JASMONIC ACID [ISTD] (CAS# 77026-92-7); (M+H)+  | 0.001322842 | 0.040899575 | 12.8623085 | 3.6850777   | 12.8623085 | up   | 1.2450421   | 0.31619453   | 1.2450421  | up   | -10.330822  | -3.3688831  | 10.330822  | down |
| C11 H22 O4 P2                                   | 0.001770443 | 0.040899575 | 1.3572704  | 0.44070816  | 1.3572704  | up   | 1.2518687   | 0.32408333   | 1.2518687  | up   | -1.0841954  | -0.11662483 | 1.0841954  | down |
| C23 H40 O P2 S2                                 | 0.00196233  | 0.040899575 | 1.926049   | 0.9456444   | 1.926049   | up   | 1.5130521   | 0.5974617    | 1.5130521  | up   | -1.2729561  | -0.34818268 | 1.2729561  | down |
| C26 H48 N10 S3                                  | 0.001600862 | 0.040899575 | 1.3582783  | 0.44177914  | 1.3582783  | up   | 1.1767968   | 0.23486519   | 1.1767968  | up   | -1.1542165  | -0.20691395 | 1.1542165  | down |
| C11 H14 N2 O5                                   | 0.001532536 | 0.040899575 | 1.3998919  | 0.48531532  | 1.3998919  | up   | 1.2782955   | 0.35422134   | 1.2782955  | up   | -1.0951238  | -0.13109398 | 1.0951238  | down |
| C16 H34 O9                                      | 0.002289758 | 0.040899575 | 4.8663845  | 2.2828503   | 4.8663845  | up   | -1.0931666  | -0.12851334  | 1.0931666  | down | -5.319769   | -2.4113636  | 5.319769   | down |
| C13 H20 N2 O                                    | 0.001475415 | 0.040899575 | 1.0437044  | 0.06171322  | 1.0437044  | up   | -83.02242   | -6.375429    | 83.02242   | down | -86.65087   | -6.4371424  | 86.65087   | down |
| JASMONIC ACID [ISTD] (CAS# 77026-92-7); (M+Na)+ | 0.001673901 | 0.040899575 | 1.4459662  | 0.5320339   | 1.4459662  | up   | 1.2951107   | 0.3730755    | 1.2951107  | up   | -1.1164808  | -0.15895844 | 1.1164808  | down |
| C23 H31 N O6                                    | 0.002144916 | 0.040899575 | 1.0603632  | 0.08455849  | 1.0603632  | up   | 1.0050445   | 0.007259369  | 1.0050445  | up   | -1.0550411  | -0.07729912 | 1.0550411  | down |
| C29 H46 O4                                      | 0.002076582 | 0.040899575 | 1.4566016  | 0.54260635  | 1.4566016  | up   | 1.2336806   | 0.30296898   | 1.2336806  | up   | -1.1806959  | -0.23963737 | 1.1806959  | down |
| C34 H55 N5 O11                                  | 0.001777541 | 0.040899575 | -3.0123253 | -1.5908775  | 3.0123253  | down | -1.8616177  | -0.89655685  | 1.8616177  | down | 1.6181223   | 0.6943207   | 1.6181223  | up   |
| C20 H41 N O3                                    | 0.002384401 | 0.040899575 | 32.99508   | 5.044179    | 32.99508   | up   | -2.1363642  | -1.0951576   | 2.1363642  | down | -70.48951   | -6.1393366  | 70.48951   | down |
| C12 H18 N2 O                                    | 0.002343498 | 0.040899575 | 3.4940474  | 1.8048992   | 3.4940474  | up   | -3.6546128  | -1.8697186   | 3.6546128  | down | -12.76939   | -3.6746178  | 12.76939   | down |
| C11 H15 N O3                                    | 0.002076821 | 0.040899575 | 3.509747   | 1.811367    | 3.509747   | up   | -3.2092702  | -1.6822453   | 3.2092702  | down | -11.263726  | -3.4936123  | 11.263726  | down |
| C28 H44 O4                                      | 0.00211477  | 0.040899575 | 1.4309068  | 0.5169296   | 1.4309068  | up   | 1.2832568   | 0.35980988   | 1.2832568  | up   | -1.1150588  | -0.15711975 | 1.1150588  | down |
| C26 H37 N12 O P                                 | 0.002030677 | 0.040899575 | 1.2872533  | 0.36429596  | 1.2872533  | up   | 1.192206    | 0.2536335    | 1.192206   | up   | -1.079724   | -0.11066246 | 1.079724   | down |
| C12 H22 O2 S3                                   | 0.001248244 | 0.040899575 | 1.3882676  | 0.47328568  | 1.3882676  | up   | 1.2382412   | 0.3082924    | 1.2382412  | up   | -1.1211609  | -0.16499329 | 1.1211609  | down |
| C34 H52 O3 P4                                   | 0.001549289 | 0.040899575 | 1.3808469  | 0.46555328  | 1.3808469  | up   | 1.2628407   | 0.33667278   | 1.2628407  | up   | -1.0934448  | -0.1288805  | 1.0934448  | down |
| 4-ACETAMIDOBUTANOATE (CAS# 3025-96-5); (M+Na)+  | 0.002140249 | 0.040899575 | 12.087709  | 3.595469    | 12.087709  | up   | 4.7283654   | 2.2413416    | 4.7283654  | up   | -2.5564244  | -1.3541274  | 2.5564244  | down |
| C26 H47 N6 O4 P S                               | 0.00215928  | 0.040899575 | 1.3562031  | 0.4395733   | 1.3562031  | up   | 1.2095572   | 0.2744789    | 1.2095572  | up   | -1.1212394  | -0.16509438 | 1.1212394  | down |
| C12 H18 O3                                      | 0.002239034 | 0.040899575 | 1.434957   | 0.52100754  | 1.434957   | up   | 1.2936956   | 0.3714981    | 1.2936956  | up   | -1.1091923  | -0.14950943 | 1.1091923  | down |
| C35 H60 S3                                      | 0.001792084 | 0.040899575 | -1.9182893 | -0.9398203  | 1.9182893  | down | -20.134693  | -4.3316116   | 20.134693  | down | -10.496172  | -3.3917913  | 10.496172  | down |
| C14 H30 O8                                      | 0.002354058 | 0.040899575 | 4.25234    | 2.0882568   | 4.25234    | up   | -1.1032516  | -0.14176178  | 1.1032516  | down | -4.6914005  | -2.2300186  | 4.6914005  | down |
| C4 H11 N                                        | 0.001554156 | 0.040899575 | 1.3496888  | 0.43262672  | 1.3496888  | up   | -1.0666735  | -0.09311867  | 1.0666735  | down | -1.4396772  | -0.5257454  | 1.4396772  | down |
| C16 H30 O2 P2                                   | 0.002390235 | 0.040899575 | -10.404966 | -3.3792005  | 10.404966  | down | 4.799605    | 2.2629156    | 4.799605   | up   | 49.939728   | 5.642116    | 49.939728  | up   |
| C23 H48 N O7 P                                  | 0.001489625 |             |            |             |            |      |             |              |            |      |             |             |            |      |
